# Supplementary material for: Sterically Controlled 5-exo-dig Cyclization Enables Modular Synthesis of Non-benzenoid Polycyclic Aromatic Hydrocarbons with Intriguing (Anti)aromaticity and Diradical
Source: Research Square preprint supplement (doi:10.21203/rs.3.rs-7977582/v1), 2025-11-07
Supplement: Supplementary file 1 [file 78e62855d2ccf4f36e1dadbc.docx]

**Sterically Controlled 5-exo-dig Cyclization Enables Modular Synthesis of Non-benzenoid Polycyclic Aromatic Hydrocarbons with Intriguing (Anti)aromaticity and Diradical**

Liangliang Chen,‡,*,[a] Zhichun Shangguan,‡,[b] Tianyu Shi,‡,[c] Liyuan Qin,‡,[c] Yiyun Zeng,[a] Qinqiu Zhu,[a] Jin Chen,[a] Junhong Liang,[a] Xiaosong Qiu,[a] Xunchang Wang,[a] Deqing Zhang,[c] Renqiang Yang*[a]

[a] Key Laboratory of Flexible Optoelectronic Materials and Technology (Ministry of Education), School of Optoelectronic Materials & Technology, Jianghan University, Wuhan, 430056, China

[b] College of Chemistry and Materials Engineering, Wenzhou University, Key Lab of Biohealth Materials and Chemistry of Wenzhou, Wenzhou, 325027, China.

[c] Beijing National Laboratory for Molecular Sciences, Institute of Chemistry, Chinese Academy of Sciences, Beijing, 100190, China.

[‡] These authors contribute equally to this work.

CONTENTS

[1. Materials and characterization techniques S2](#_Toc204874817)

[2. Synthesis and characterization S4](#_Toc204874818)

[3. The 1H-1H NOESY of compounds S19](#_Toc204874819)

[4. Crystallographic data S22](#_Toc204874820)

[5. Thermogravimetric analysis (TGA) analysis S31](#_Toc204874821)

[6. Calculations on electronic properties S32](#_Toc204874822)

[7. The stabilities of **1**, **2** and **3** S43](#_Toc204874823)

[8. The variable-temperature 1H NMR S44](#_Toc204874824)

[9. The magnetic properties S46](#_Toc204874825)

[10. OFETs fabrication and characterization S48](#_Toc204874826)

[11. Other substrates used for this synthetic strategy S50](#_Toc204874827)

[12. Atomic Cartesian coordinates of the optimized geometry S91](#_Toc204874828)

[13. 1H NMR and 13C NMR spectra S129](#_Toc204874829)

[14. HRMS spectra S158](#_Toc204874830)

[15. Reference S168](#_Toc204874831)

1. Materials and characterization techniques

All reagents and starting materials were purchased from commercial suppliers and used without further purification unless otherwise specified.

1H NMR and 13C NMR spectra were recorded on AVANCE III 400 MHz, AVANCE III 500 MHz 600MHz and Bruker NEO 700 WB spectrometers. High-resolution mass spectral (HRMS) data were collected on either 9.4T Solarix Mass instrument or APEX Ⅱ Mass instrument. Elemental analyses (EA) were performed on a Carlo-Erba-1106 instrument. Thermogravimetric analysis (TGA) analysis was carried on a PerkinElmer TGA 8000 Thermogravimetric Analyzer instrument under N2 at a heating rate of 10 °C/min from 50 °C to 600 °C. UV-vis-NIR absorption spectra were collected on a HITACHI UH4150 UV-vis spectrophotometer. Cyclic voltammograms (CV) and differential pulse voltammograms (DPV) measurements were carried out in a conventional three-electrode cell using a glassy carbon as the working electrode, Pt as the counter electrode, and Ag/AgCl (saturated KCl) as the reference electrode on a computer-controlled CHI660C instrument at ambient temperature; *n*-Bu4NPF6 (0.1 M in dichloromethane) was used as the supporting electrolyte. For calibration, the redox potential of ferrocene/ferrocenium (Fc/Fc+) was measured under the same conditions. HOMO and LUMO energies of these conjugated polymers were estimated with the following equations: HOMO = - (*E*oxonset -*E*Fc1/2 + 4.8) eV, LUMO = -(*E*redonset -*E*Fc1/2 + 4.8) eV. The single-crystal X-ray diffraction was carried out on a Rigaku Synergy-R diffractometer. XRD measurements were conducted on a PANalytical Empyrean with X-ray wavelength of 1.54 Å. The electron-spin resonance (ESR) spectra of solution and solid were conducted on Bruker E 500. The superconducting quantum interference device (SQUID) magnetometry was measured on MPMS3. The FET device performances were evaluated on a Keithley 4200 SCS semiconductor parameter analyzer.

Density functional theory (DFT) calculations were employed with the Gaussian 09 package.[S1] The geometry optimization and frequency analysis were calculated at the (U)B3LYP-D3(BJ)/6-31G(d,p) level of theory.[S2-S4] The vertical electronic excitation energies were calculated using time-dependent density functional theory (TDDFT)[S5], and 30 lowest-lying singlet excited states were considered at (U)B3LYP-D3(BJ)/6-31G(d,p) level of theory. Nucleus-independent chemical shifts (NICS)[S6], the anisotropy of current-induced density (ACID)[S7], and the iso-chemical shielding surfaces (ICSS)[S8] were calculated at the (U)B3LYP/6-31G(d,p) level of theory, with the assistance of the Multiwfn program[S9]. The diradical character (*y0*) was calculated according to following equation[S10]:

where T is defined as:

Here, *n*HOMO and *n*LUMO represent the occupation numbers of the HOMO and LUMO orbitals, respectively.

2. Synthesis and characterization

2.1 *Synthesis and characterization of compound* ***1***

**Scheme S1** The synthetic routes of compound **1**

*Synthesis of compound* ***5***

To a 100 mL two-necked flask equipped with a magnetic stir bar, 1,4-Dibromo-2,5-diiodobenzene (compound **4**, 3 g, 6.15 mmol), Pd(PPh3)2Cl2 (440 mg, 0.62 mmol) and CuI (240 mg, 1.24 mmol) were added. The mixture was degassed and charged with nitrogen for three times and then 1-(tert-butyl)-4-ethynylbenzene (1.943 g, 12.3 mmol), diisopropylamine (20 mL) and DMF (20 mL) were added subsequently. The mixture was stirred at room temperature overnight. The reaction was quenched with hydrochloric acid solution (2 M, 60 mL), and the mixture was extracted with dichloromethane (100 mL×3) and washed with hydrochloric acid solution (2 M, 60 mL×3). The organic layer was dried by anhydrous Na2SO4 and concentrated under reduced pressure. The crude product was then purified by flash column chromatography using petroleum ether (b.p. 60-90 oC) as eluent to give compound **5** as a white solid (2.7 g, 80.1% yield).

1H NMR (400 MHz, CDCl3, 298 K) δ (ppm) 7.77 (s, 2H), 7.51 (d, *J* = 8.4 Hz, 4H), 7.39 (d, *J* = 8.4 Hz, 4H), 1.33 (s, 18H).

13C NMR (101 MHz, CDCl3, 298 K) δ (ppm) 152.6, 135.9, 131.6, 126.5, 125.5, 123.7, 119.3, 96.9, 86.4, 34.9, 31.2.

HRMS (MALDI- FTICR) m/z: [M]+ calcd for C30H28Br2 546.0552; found 546.0557.

*Synthesis of compound* ***6***

To a 250 mL three-necked flask equipped with a magnetic stir bar, compound **5** (1.5 g, 2.75 mmol), 2-Methoxy-5-formylphenylboronic acid (1.98 g, 11mmol), Na2CO3 (1.75 g, 16.5 mmol) and Pd(PPh3)4 (318 mg, 0.275 mmol) were added. The mixture was degassed and charged with nitrogen for three times. Then toluene (80 mL), ethanol (15 mL) and water (15 mL) were added into the flask. The mixture was heated at 110 oC (oil bath) for 15 h. After cooling to room temperature, the solvent was removed by rotary evaporation. The crude product was then purified by flash column chromatography using petroleum ether (b.p. 60-90 oC) and dichloromethane (2/1, v/v) as eluent to give compound **6** as a light-yellow solid. (1.58 g, 87.3% yield).

1H NMR (400 MHz, CDCl3, 298 K) δ (ppm) 9.97 (s, 2H), 8.01-7.96 (m, 4H), 7.65 (s, 2H), 7.27 (d, *J* = 8.5 Hz, 4H), 7.15 (d, *J* = 9.1 Hz, 2H), 7.11 (d, *J* = 8.5 Hz, 4H), 3.92 (s, 6H), 1.28 (s, 18H).

13C NMR (101 MHz, CDCl3) δ 190.8, 162.1, 151.7, 138.9, 133.7, 133.5, 131.5, 131.1, 129.7, 129.5, 125.3, 123.1, 120.0, 111.0, 94.0, 88.0, 56.1, 34.8, 31.1.

HRMS (MALDI- FTICR) m/z: [M]+ calcd for C46H42O4 658.3077; found 658.3076.

*Synthesis of compound* ***7***

To a Pyrex tube equipped with a magnetic stir bar, compound **6** (50 mg×25, 1.82 mmol), Pd(OAc)2 (2.2 mg×24, 0.23 mmol), 2-dicyclohexylphosphino-2',6'-dimethoxybiphenyl (Sphos, 6.8 mg×24, 0.41 mmol), Tri-n-butylphosphine (20 μL×24, 1.92 mmol) and toluene (2 mL×24) were added sequentially. Then through a freeze-pump-thaw cycle, the tube was charged with nitrogen for three times again. After rising to room temperature, the mixture was heated at 120 oC for 24 h. After cooling to room temperature, a large amount of precipitation was generated and filtered off. The precipitation was washed with MeOH. The residue was collected and dried under vacuum to afford compound **7** (985 mg, 82.1%), which was directly used for the next step without further purification.

1H NMR (400 MHz, CDCl3, 298 K) δ (ppm) 10.37 (s, 2H), 8.70 (s, 2H), 8.54 (s, 2H), 7.79 (d, *J* = 8.5 Hz, 2H), 7.72 -7.66 (m, 4H), 7.57-7.52 (m, 4H), 6.92 (d, *J* = 8.6 Hz, 2H), 3.83 (s, 6H), 1.43 (s, 18H).

13C NMR (176 MHz, CDCl3, 298 K) δ (ppm) 190.8, 159.2, 151.4, 143.2, 137.2, 137.1, 136.3, 136.0, 134.1, 133.8, 130.0, 128.6, 126.8, 125.4, 119.0, 109.4, 55.5, 34.9, 31.5.

HRMS (MALDI- FTICR) m/z: [M]+ calcd for C46H42O4 658.3077; found 658.3080.

*Synthesis of compound* ***9***

First step: To a 100 mL three-necked flask equipped with a magnetic stir bar, compound **7** (250 mg, 0.38 mmol) and THF (30 mL) were added. The mixture was degassed and charged with nitrogen for three times and stirred at 0 oC (ice-water bath) for 5 min. Then, 2-mesitylmagnesium bromide (1 M solution in THF, 3.8 mL, 3.8 mmol) was added to the mixture at 0 oC. After dripping completely, the mixture was warmed to room temperature for 2 h. Then, H2O was added to quench the reaction. The residual was extracted by ethyl acetate three times (50 mL×3), and washed with saturated sodium chloride aqueous solution (50 mL×3). The organic layer was dried by anhydrous Na2SO4. The crude product of compound **8** was obtained by the removal of solvent and used directly for the next step.

HRMS (MALDI- FTICR) m/z: [M]+ calcd for C64H66O4 898.4955; found 898.4960.

Second step: A 100 mL three-necked flask containing the obtained crude product was under vacuum for 15 min. Then, 20 mL of dry dichloromethane (DCM) was added, and 0.6 mL of BF3·OEt2 was added dropwise through the syringe (turned dark immediately). The mixture was stirred for 5 h at room temperature. Then, 5 mL of saturated sodium carbonate (Na2CO3) solution was added to quench the reaction. The mixture was extracted by DCM (50 mL×3), and washed with saturated sodium chloride aqueous solution (50 mL×3). The organic layer was dried with anhydrous Na2SO4. The solvent was removed under reduced pressure and the residual, containing a small amount DCM solvent, was added to MeOH to precipitate the solid. The precipitation was filtered and the filter residue was washed with MeOH. After drying under the vacuum, the obtained orange crude product of compound **9** was directly used for the next reaction.

HRMS (MALDI- FTICR) m/z: [M]+ calcd for C64H62O2 862.4744; found 862.4745.

*Synthesis of compound* ***1***

To a 100 mL three-necked flask equipped with a magnetic stir bar, compound **9** (crude product obtained from the above-mentioned two steps) and 20 mL dry toluene were added. The mixture was degassed and charged with nitrogen for three times and stirred at 0 oC (ice-water bath) for 3 min. Then, 2,3-dichloro-5,6-dicyano-1,4-benzoquinone (DDQ) (250 mg, 1.1 mmol) in 5 mL dry toluene was added to the mixture and the mixture was stirred under N2 at room temperature for 1 h (the color of the mixture turned to red-brown). Then H2O was added to quench the reaction. The mixture was extracted by DCM (50 mL×3), and washed with saturated sodium chloride aqueous solution (50 mL×3). The organic layer was dried by anhydrous Na2SO4. The crude product was further purified by a short silica gel column (PE/DCM = 1/1, v/v). Compound **1** was obtained as an army green solid (57 mg, 17.3% yield in three steps).

1H NMR (700 MHz, C2D2Cl4, 298 K) δ (ppm) 7.55 (s, 2H), 7.24 (d, *J* = 8.5 Hz, 4H), 7.14 (d, *J* = 8.4 Hz, 4H), 6.84 (s, 4H), 6.63 (d, *J* = 7.6 Hz, 2H), 6.44 (d, *J* = 7.7 Hz, 2H), 3.79 (s, 6H), 2.28 (s, 6H), 2.02 (s, 12H), 1.26 (s, 18H).

13C NMR (176 MHz, C2D2Cl4, 298 K) δ (ppm) 155.5, 153.7, 153.3, 149.9, 147.5, 145.4, 137.3, 136.3, 133.7, 132.9, 132.4, 132.1, 128.5, 128.0, 127.3, 125.8, 125.3, 121.8, 116.5, 110.6, 56.0, 34.6, 31.5, 21.5, 20.5.

HRMS (MALDI- FTICR) m/z: [M]+ calcd for C64H60O2 860.4587; found 860.4584.

2.2 *Synthesis and characterization of compound* ***2***

**Scheme S2** The synthetic routes of compound **2**

*Synthesis of compound* ***Na-4Br-2OH***

In a 500 mL three-necked flask equipped with a magnetic stir bar, 2,6-dihydroxynaphthalene (10 g, 62.4 mmol) was dissolved in 250 mL of acetic acid. Elemental bromine (59.8 g, 374 mmol) was then slowly added and the dark orange solution was refluxed for 24 h. Then, iron dust (401.4 mg, 7.16 mmol) was added slowly. The mixture was refluxed for 92 h. After cooling to room temperature, 400 mL of water was added and the precipitate was collected by filtration, washed with acetone and dried under reduced pressure to afford compound ***Na-4Br-2OH*** as a gray solid (24 g, 80.9 % yield), which was directly used for the next step without further purification.

HRMS (MALDI- ESI) m/z: [M]+ calcd for C10H4O2Br4 475.6898; found 475.6897.

*Synthesis of compound* ***Na-2Br-2OH***

In a 250 mL three-necked flask equipped with a magnetic stir bar, compound ***Na-4Br-2OH*** (5.0 g, 10.6 mmol) and tin (2.5 g, 21.2 mmol) were added. The mixture was degassed and charged with nitrogen for three times and AcOH (60 mL) was added. The mixture was heated at 120 oC for 48 h. After cooling to room temperature, the mixture was filtered off. The filtrate was then poured into 300 mL H2O and a large amount of precipitation was generated. The precipitation was washed with H2O. The residue was collected and dried under vacuum to afford compound ***Na-2Br-2OH*** (1.83 g, 54.8% yield), which was directly used for the next step without further purification.

1H NMR (400 MHz, DMSO-*d*6, 298 K) δ (ppm) 10.34 (s, 2H), 7.99 (s, 2H), 7.18 (s, 2H).

13C NMR (101 MHz, DMSO-*d*6, 298 K) δ (ppm) 150.3, 130.3, 129.2, 114.1, 109.5.

HRMS (MALDI- ESI) m/z: [M]+ calcd for C10H6O2Br2 317.8709; found 317.8706.

*Synthesis of compound* ***10***

To a 250 mL three-necked flask equipped with a magnetic stir bar, compound ***Na-2Br-2OH*** (5 g, 15.87 mmol), CH2Cl2 (250 mL) and pyridine (25 mL) were added. The mixture was degassed and charged with nitrogen for three times and then cooled to 0 oC (ice-water bath) for 3 min. Then, Trifluoromethanesulfonic anhydride (13.4 g, 47.6 mmol) was added slowly to the mixture under ice-water bath. After that, it was warmed to room temperature overnight. The reaction was quenched with hydrochloric acid solution (1 M, 200 mL), and the mixture was extracted with dichloromethane (200 mL×3) and washed with hydrochloric acid solution (1 M, 200 mL×3). The organic layer was dried with anhydrous Na2SO4 and concentrated under reduced pressure. The crude product was then purified by flash column chromatography using petroleum ether (b.p. 60-90 oC) and dichloromethane (8/1, v/v) as eluent to give compound **10**asa white solid (4.18 g, 45.5% yield).

1H NMR (400 MHz, CDCl3, 298 K) δ (ppm) 8.23 (s, 2H), 7.80 (s, 2H).

13C NMR (101 MHz, CDCl3, 298 K) δ (ppm) 145.7, 133.7, 131.8, 119.8, 118.7 (q, *J* = 322 Hz), 116.1.

HRMS (MALDI- ESI) m/z: [M]+ calcd for C12H4O6Br2F6S2 581.7694; found 581.7697.

*Synthesis of compound* ***11***

To a 100 mL three-necked flask equipped with a magnetic stir bar, compound **10** (3 g, 5.18 mmol), Pd(PPh3)2Cl2 (363 mg, 0.518 mmol) and CuI (198 mg, 1.036 mmol). The mixture was degassed and charged with nitrogen for three times and then 1-(tert-butyl)-4-ethynylbenzene (1.637 g, 10.36 mmol), diisopropylamine (30 mL) and DMF (30 mL) were added subsequently. The mixture was stirred at room temperature overnight. The reaction was quenched with hydrochloric acid solution (1 M, 100 mL), and the mixture was extracted with dichloromethane (100 mL×3) and washed with hydrochloric acid solution (1 M, 100 mL×3). The organic layer was dried with anhydrous Na2SO4 and concentrated under reduced pressure. The crude product was then purified by flash column chromatography using petroleum ether (b.p. 60-90 oC) and dichloromethane (10/1, v/v) as eluent to give compound **11** as a light-yellow solid (2.358 g, 76.4% yield).

1H NMR (400 MHz, CDCl3, 298 K) δ (ppm) 8.04 (s, 2H), 7.93 (s, 2H), 7.56 (d, *J* = 8.1 Hz, 4H), 7.41 (d, *J* = 8.4 Hz, 4H), 1.34 (s, 18H).

13C NMR (101 MHz, CDCl3, 298 K) δ (ppm) 152.4, 131.8, 131.6, 131.3, 130.5, 125.5, 124.6, 123.3, 119.7, 95.4, 87.5, 34.9, 31.2.

HRMS (MALDI- FTICR) m/z: [M]+ calcd for C34H30Br2 596.0717; found 596.0708.

*Synthesis of compound* ***12***

To a 100 mL three-necked flask equipped with a magnetic stir bar, compound **11** (2 g, 3.35 mmol), 2-methoxy-5-formylphenylboronic acid (1.81 g, 10 mmol), K2CO3 (2.311 g, 16.75 mmol) and Pd(PPh3)4 (194 mg, 0.167 mmol) were added. The mixture was degassed and charged with nitrogen for three times. Then toluene (80 mL), ethanol (15 mL) and water (15 mL) were added to the flask. The mixture was heated at 110 oC (oil bath) overnight. After cooling to room temperature, the solvent was removed by rotary evaporation. The crude product was then purified by flash column chromatography using petroleum ether (b.p. 60-90 oC) and dichloromethane (2/1, v/v) to dichloromethane and ethyl acetate (20:1, v/v) as eluent to give a light-yellow solid **12** (1.227 g, 51.7% yield).

1H NMR (400 MHz, CDCl3, 298 K) δ (ppm) 9.99 (s, 2H), 8.11 (s, 2H), 8.02 (dt, *J* = 8.5, 1.7 Hz, 2H), 7.97 (t, *J* = 1.6 Hz, 2H), 7.83 (s, 2H), 7.28 (d, *J* = 7.6 Hz, 4H), 7.17 (d, *J* = 8.5 Hz, 2H), 7.12 (d, *J* = 8.6 Hz, 4H), 3.88 (s, 6H), 1.29 (s, 18H).

13C NMR (101 MHz, CDCl3, 298 K) δ (ppm) 191.0, 162.5, 151.6, 137.6, 133.4, 131.7, 131.5, 131.1, 130.6, 129.6, 128.4, 125.4, 122.6, 120.1, 110.9, 93.0, 88.4, 56.1, 34.8, 31.1.

HRMS (MALDI- FTICR) m/z: [M]+ calcd for C50H44O4 708.3234; found 708.3239.

*Synthesis of compound* ***13***

To a Pyrex tube equipped with a magnetic stir bar, compound **12** (50 mg × 22, 1.55 mmol), Pd(OAc)2 (2.2 mg × 22, 0.21 mmol), 2-dicyclohexylphosphino-2',6'-dimethoxybiphenyl (Sphos, 6.8 mg × 22, 0.36 μmol), Tri-n-butylphosphine (20 μL × 22, 1.76 mmol) and toluene (2 mL × 22) were added sequentially. Then through a freeze-pump-thaw cycle, the tube was charged with nitrogen for three times again. After raising to room temperature, the mixture was heated at 120 oC for 12 h. After cooling to room temperature, a large amount of precipitation was generated and filtered off. The precipitation was washed with MeOH. The residue was collected and dried under vacuum to afford compound **13** (952 mg, 86.5%), which was directly used for the next step without further purification.

1H NMR (400 MHz, CDCl3, 298 K) δ (ppm) 10.47 (s, 2H), 8.47 (s, 2H), 8.15 (s, 2H), 7.89 (d, *J* = 8.5 Hz, 2H), 7.79 (s, 2H), 7.57 (s, 8H), 7.04 (d, *J* = 8.6 Hz, 2H), 4.08 (s, 6H), 1.49 (s, 18H).

13C NMR (176 MHz, CDCl3, 298 K) δ (ppm) 190.7, 160.0, 151.6, 143.8, 136.5, 136.3, 136.0, 135.0, 134.7, 134.1, 132.4, 128.9, 128.5, 127.1, 126.4, 125.7, 123.7, 123.1, 109.7, 55.7, 34.9, 31.5.

HRMS (MALDI- FTICR) m/z: [M]+ calcd for C50H44O4 708.3234; found 708.3233.

*Synthesis of compound* ***15***

First step: To a 100 mL three-necked flask equipped with a magnetic stir bar, compound **13** (380 mg, 0.53 mmol) and THF (80 mL) were added. The mixture was degassed and charged with nitrogen for three times and stirred at 0 oC (ice-water bath) for 5 min. Then, 2-mesitylmagnesium bromide (1 M solution in THF, 5.3 ml, 5.3 mmol) was added to the mixture at 0 oC. After dripping completely, the mixture was warm to room temperature overnight. H2O was added to quench the reaction. The residual was extracted by DCM and washed with saturated sodium chloride aqueous solution. The organic layer was dried with anhydrous Na2SO4. The crude product of compound **14** was obtained by removal of solvent and used to conduct the next reaction as a yellow solid.

HRMS (MALDI- FTICR) m/z: [M]+ calcd for C68H68O4 948.5112; found 948.5115.

Second step: A 100 mL three-necked flask containing the obtained crude product (**14**) was under vacuum for 15 min, then 40 mL of dry DCM was added, and 0.8 mL of BF3·OEt2 was added dropwise through the syringe (turned to dark brown immediately). The mixture was stirred for 30 min at room temperature. Then 5 mL of saturated sodium carbonate (Na2CO3) solution was added to quench the reaction, the color of the mixture turned green. The mixture was extracted by DCM, and washed with saturated sodium chloride aqueous solution. The organic layer was dried with anhydrous Na2SO4. The solvent was removed under reduced pressure and the residue was directly used for the next reaction (compound **15**).

HRMS (MALDI- FTICR) m/z: [M]+ calcd for C68H64O2 912.4900; found 912.4899.

*Synthesis of compound* ***2***

To a 100 mL Schlenk flask equipped with a magnetic stir bar, compound **15** (crude product obtained from the above-mentioned second step) and 30 mL dry toluene were added. Then, through a freeze-pump-thaw cycle, the tube was charged with nitrogen for three times again. After the mixture had thawed, 2,3-dichloro-5,6-dicyano-1,4-benzoquinone (DDQ) (430 mg, 1.89 mmol) in 4 mL dry toluene was added to the mixture and the mixture was stirred under N2 at room temperature for 2 h (the color of the mixture turned to blue-green). After the reaction finished, the mixture was poured into hexane (300 mL) and a large amount of precipitation was generated and filtered off. The precipitation was washed with MeOH. The crude product was further purified by a short silica gel column (DCM/toluene = 4/1, v/v). Compound **2** was obtained as a purple solid (305 mg, 63.3% yield in three steps).

1H NMR (700 MHz, C2D2Cl4, 298 K) δ (ppm) 7.75 (s, 2H), 7.62 (s, 2H), 7.39 (d, *J* = 8.5 Hz, 4H), 7.26 (d, *J* = 8.3 Hz, 4H), 6.95 (s, 4H), 6.81 (d, *J* = 7.5 Hz, 2H), 6.59 (d, *J* = 7.7 Hz, 2H), 4.03 (s, 6H), 2.39 (s, 6H), 2.13 (s, 12H), 1.39 (s, 18H).

13C NMR (176 MHz, C2D2Cl4, 298 K) δ (ppm) 154.7, 154.6, 152.3, 149.8, 144.2, 143.7, 137.2, 136.4, 134.4, 133.0, 132.7, 132.5, 130.8, 129.6, 128.5, 127.7, 127.3, 125.4, 122.6, 120.4, 116.7, 110.1, 56.3, 34.7, 31.5, 21.5, 20.6.

HRMS (MALDI- FTICR) m/z: [M]+ calcd for C68H62O2 910.4744; found 910.4743.

2.3 *Synthesis and characterization of compound* ***3***

**Scheme S3** The synthetic routes of compound **3**

*Synthesis of compound* ***16***

In a 250 mL three-necked flask equipped with a magnetic stir bar, 2,6-dibromo-1,5-dihydroxynaphthalene (10 g, 31.4 mmol), CH2Cl2 (100 mL) and pyridine (10 mL) were added. The mixture was degassed and charged with nitrogen for three times and then cooled to 0 oC (ice-water bath) for 3 min. Then, Trifluoromethanesulfonic anhydride (26.6 g, 94.3 mmol) was added slowly to the mixture under an ica-water bath. After that, it was warmed to room temperature for 12 h. The reaction was quenched with hydrochloric acid solution (1 M, 100 mL), and the mixture was extracted with dichloromethane (100 mL× 3) and washed with water (100 mL× 3). The organic layer was dried with anhydrous Na2SO4 and concentrated under reduced pressure. The crude product was then purified by flash column chromatography using petroleum ether (b.p. 60-90 oC) and dichloromethane (10:1, v/v) as eluent to give a white solid **16**(11.904 g, 65.5% yield).

1H NMR (400 MHz, CDCl3, 298 K) δ (ppm): 8.02 (d, *J* = 9.0 Hz, 2H), 7.88 (d, *J* = 9.1 Hz, 2H).

13C NMR (101 MHz, CDCl3, 298 K) δ (ppm): 142.5, 133.1, 128.6, 122.9, 122.9, 118.6 (q, 12.8 Hz), 116.6.

*Synthesis of compound* ***17***

In a 250 mL three-necked flask equipped with a magnetic stir bar, compound **16**(5.2 g, 8.9 mmol), Pd(PPh3)2Cl2 (627 mg, 0.9 mmol) and CuI (343 mg, 1.8 mmol). The mixture was degassed and charged with nitrogen for three times and then 1-(tert-butyl)-4-ethynylbenzene (2.8 g, 17.9 mmol), diisopropylamine (20 mL) and DMF (50 mL) were added subsequently. The mixture was stirred at room temperature overnight. The reaction was quenched with hydrochloric acid solution (3 M, 50 mL), and the mixture was extracted with dichloromethane (100 mL×3) and washed with hydrochloric acid solution (3 M, 50 mL×3). The organic layer was dried by anhydrous Na2SO4 and concentrated under reduced pressure. The crude product was then purified by flash column chromatography using petroleum ether (b.p. 60-90 oC) as eluent to give a light-yellow solid **17** (4.6 g, 85.3% yield).

1H NMR (400 MHz, CDCl3, 298 K) δ (ppm) 8.22 (d, *J* = 8.9 Hz, 2H), 7.75 (d, *J* = 8.9 Hz, 2H), 7.65-7.60 (m, 4H), 7.47-7.42 (m, 4H), 1.36 (s, 18H).

13C NMR (101 MHz, CDCl3, 298 K) δ (ppm) 152.5, 132.9, 131.6, 131.6, 131.3, 127.6, 125.6, 125.5, 123.2, 119.7, 100.2, 85.4, 34.9, 31.2.

HRMS (MALDI- FTICR) m/z: [M]+ calcd for C34H30Br2 596.0708; found 596.0716.

*Synthesis of compound* ***18***

In a 250 mL three-necked flask equipped with a magnetic stir bar, compound **17** (3 g, 5 mmol), 2-Methoxy-5-formylphenylboronic acid (2.7 g, 15 mmol), K2CO3 (3.5 g, 25 mmol) and Pd(PPh3)4 (290 mg, 0.25 mmol) were added. The mixture was degassed and charged with nitrogen for three times. Then toluene (120 mL), ethanol (20 mL) and water (20 mL) were added into the flask. The mixture was heated at 110 oC (oil bath) overnight. After cooling to room temperature, the solvent was removed by rotary evaporation. The crude product was then purified by flash column chromatography using petroleum ether (b.p. 60-90 oC) and dichloromethane (2/1, v/v) as eluent to give a light-yellow solid **18** (1.6 g, 44.1% yield).

1H NMR (400 MHz, CDCl3, 298 K) δ (ppm) 10.00 (s, 2H), 8.57 (d, *J* = 8.5 Hz, 2H), 8.09 (d, *J* = 2.2 Hz, 2H), 8.01 (dd, *J* = 8.5, 2.1 Hz, 2H), 7.64 (d, *J* = 8.5 Hz, 2H), 7.34-7.31(m, 4H), 7.26-7.22 (m, 4H), 7.18 (d, *J* = 8.6 Hz, 2H), 3.90 (s, 6H), 1.31 (s, 18H). .

13C NMR (101 MHz, CDCl3, 298 K) δ (ppm) 191.0, 162.2, 151.8, 138.8, 134.1, 132.6, 131.5, 131.1, 130.8, 129.5, 128.9, 126.6, 125.4, 120.9, 120.2, 111.1, 98.4, 86.1, 56.1, 34.8, 31.2.

HRMS (MALDI- FTICR) m/z: [M]+ calcd for C50H44O4 708.3234; found 708.3231.

*Synthesis of compound* ***19***

To a Pyrex tube equipped with a magnetic stir bar, compound **18** (50 mg × 20, 1.41 mmol), Pd(OAc)2 (2.2 mg × 20, 0.19 mmol), 2-dicyclohexylphosphino-2',6'-dimethoxybiphenyl (Sphos, 6.8 mg × 20, 0.32 mmol), Tri-n-butylphosphine (20 μL × 20, 1.6 mmol) and toluene (2 mL × 20) were added sequentially. Then, through a freeze-pump-thaw cycle, the tube was charged with nitrogen for three times again. After raising to room temperature, the mixture was heated at 120 oC for 12 h. After cooling to room temperature, a large amount of precipitation was generated and filtered off. The precipitation was washed with MeOH. The residue was collected and dried under vacuum to afford compound **19** (967 mg, 96.7%), which was directly used for the next step without further purification.

1H NMR (400 MHz, CDCl3, 298 K) δ (ppm) 9.74 (s, 2H), 8.63 (d, *J* = 8.8 Hz, 2H), 8.47 (d, *J* = 8.7 Hz, 2H), 8.23 (s, 2H), 7.70 (d, *J* = 8.6 Hz, 2H), 7.37 (s, 8H), 7.02 (d, *J* = 8.6 Hz, 2H), 4.15 (s, 6H), 1.33 (s, 18H).

13C NMR (101 MHz, CDCl3, 298 K) δ (ppm) 188.3, 159.2, 152.1, 142.2, 138.5, 138.2, 137.3, 133.9, 129.4, 128.7, 127.7, 127.3, 126.3, 125.1, 124.8, 123.2, 110.9, 55.8, 34.8, 31.2.

HRMS (MALDI- FTICR) m/z: [M]+ calcd for C50H44O4 708.3234; found 708.3232.

*Synthesis of compound* ***3***

First step: To a 50 mL three-necked flask equipped with a magnetic stir bar, compound 9 (200 mg, 0.28 mmol) and THF (25 mL)were added. The mixture was degassed and charged with nitrogen for three times and stirred at 0 oC (ice-water bath) for 5 min. Then, 2-Mesitylmagnesium bromide (1 M solution in THF, 4.5 mL, 4.5 mmol) was added to the mixture at 0 oC. After dripping completely, the mixture was warm to room temperature overnight. Then, H2O was added to quench the reaction. The residual was extracted by DCM, and washed with saturated sodium chloride aqueous solution. The organic layer was dried with anhydrous Na2SO4. The crude product of compound **20** was obtained by removal of solvent and used to conduct the next reaction as a yellow solid.

HRMS (MALDI- FTICR) m/z: [M]+ calcd for C68H68O4 948.5112; found 948.5115.

Second step: A 100 mL three-necked flask containing the obtained crude product was under vacuum for 15 min, then 25 mL of dry DCM was added, 0.4 mL of BF3·OEt2 was added dropwise through syringe (turned to dark brown immediately) under 0 oC (ice-water bath). Then, the mixture was kept stirred for 4 h at 50 oC. Then 2 mL of saturated sodium carbonate (Na2CO3) solution was added to quench the reaction. The mixture was extracted by DCM, and washed with saturated sodium chloride aqueous solution. The organic layer was dried with anhydrous Na2SO4. The solvent was removed under reduced pressure and the residue was directly used for the next reaction (compound **21**).

HRMS (MALDI- FTICR) m/z: [M]+ calcd for C68H64O2 912.4900; found 912.4899.

Third step: To a 50 mL Schlenk flask equipped with a magnetic stir bar, compound **21** (crude product obtained from the second step) and 15 mL dry toluene were added. Then, through a freeze-pump-thaw cycle, the tube was charged with nitrogen for three times. After the mixture had thawed, 2,3-dichloro-5,6-dicyano-1,4-benzoquinone (DDQ) (71.8 mg, 0.32 mmol) in 2 mL dry toluene was added to the mixture and the mixture was stirred under N2 at room temperature for 0.5 h. Then, H2O (5 mL) and Et3N (2 mL) were added to quench the reaction. The residual was extracted by DCM, and washed with saturated sodium chloride aqueous solution. The organic layer was dried with anhydrous Na2SO4 and the solvent was removed by rotary evaporation. The crude product was then purified by flash column chromatography using dichloromethane and methanol (1/0~20/1, v/v) as eluent to give a brown solid of **3** (19 mg, 19.7% yield).

1H NMR (700 MHz, CDCl3, 298 K) δ (ppm) 9.85 (s, 2H), 9.32 (d, *J* = 8.6 Hz, 2H), 9.23 (d, *J* = 8.5 Hz, 2H), 8.46 (d, *J* = 8.2 Hz, 2H), 8.02 (dd, *J* = 8.1, 1.9 Hz, 2H), 7.89 (d, *J* = 1.9 Hz, 2H), 7.54 (d, *J* = 10.0 Hz, 2H), 7.14 (s, 4H), 6.93 (d, *J* = 10.0 Hz, 2H), 2.50 (s, 6H), 1.88 (s, 12H), 1.25 (s, 18H).

13C NMR (176 MHz, CDCl3, 298 K) δ (ppm) 154.4, 141.6, 140.3, 139.2, 138.2, 138.0, 137.9, 137.6, 137.4, 136.1, 135.9, 134.2, 133.4, 130.3, 130.2, 129.1, 129.0, 128.9, 128.6, 126.7, 126.0, 123.7, 35.3, 30.9, 21.3, 20.1.

HRMS (MALDI- FTICR) m/z: [M]+ calcd for C66H56O2 880.4274; found 880.4269.

3. The 1H-1H NOESY of compounds


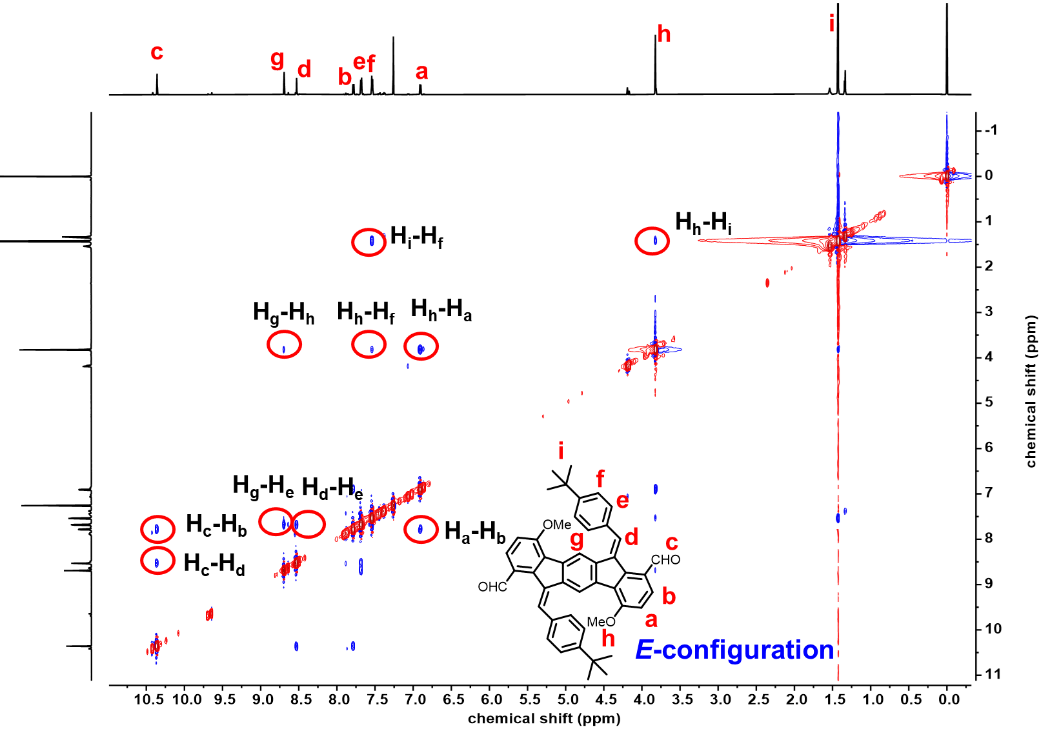


**Figure S1** The NOESY of compound **7** (700 MHz, C2D2Cl4, 298 K).


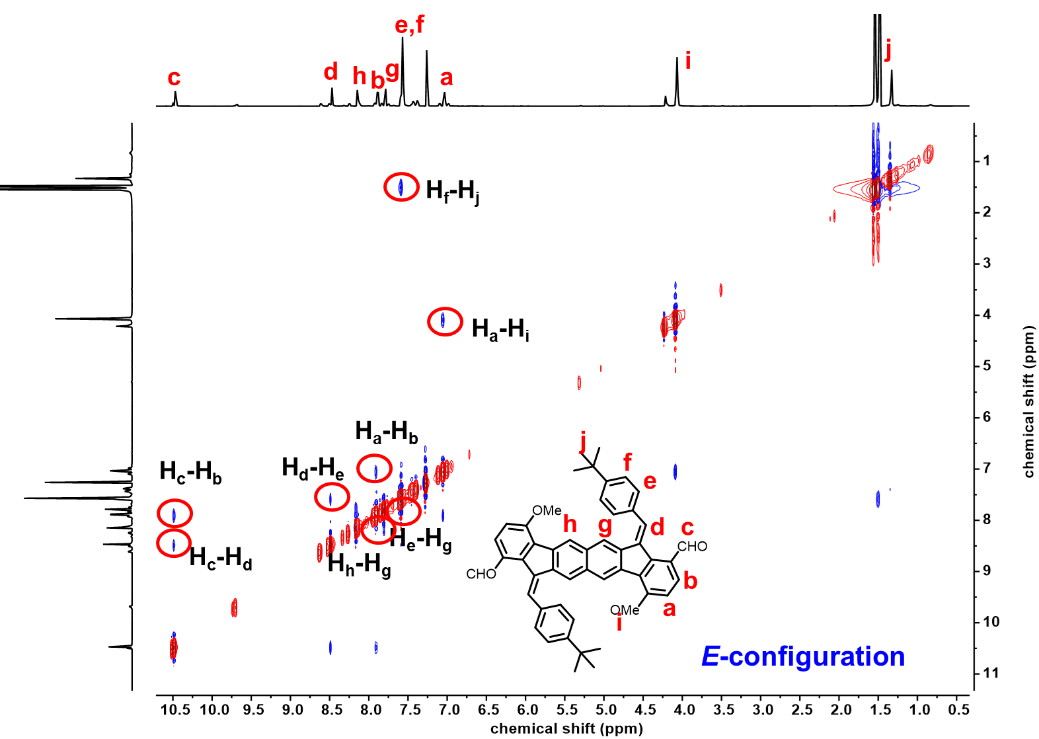


**Figure S2** The NOESY of compound **13** (700 MHz, C2D2Cl4, 298 K).


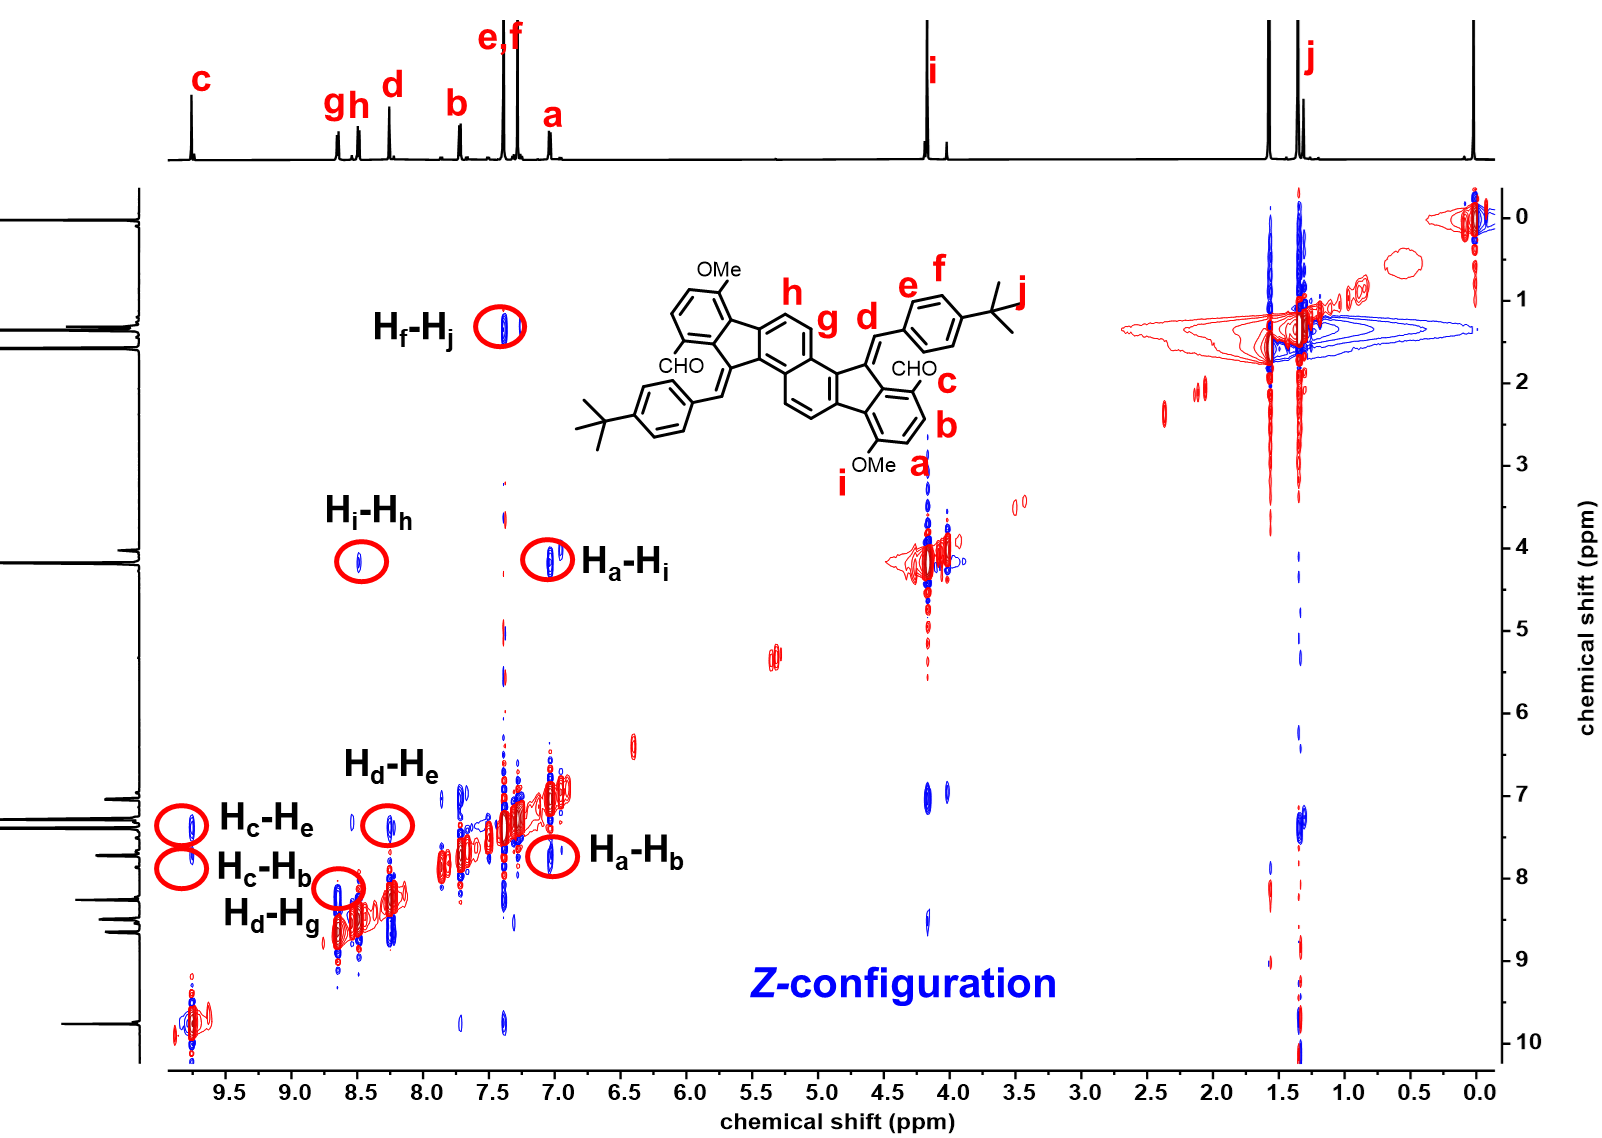


**Figure S3** The NOESY of compound **19** (700 MHz, C2D2Cl4, 298 K).


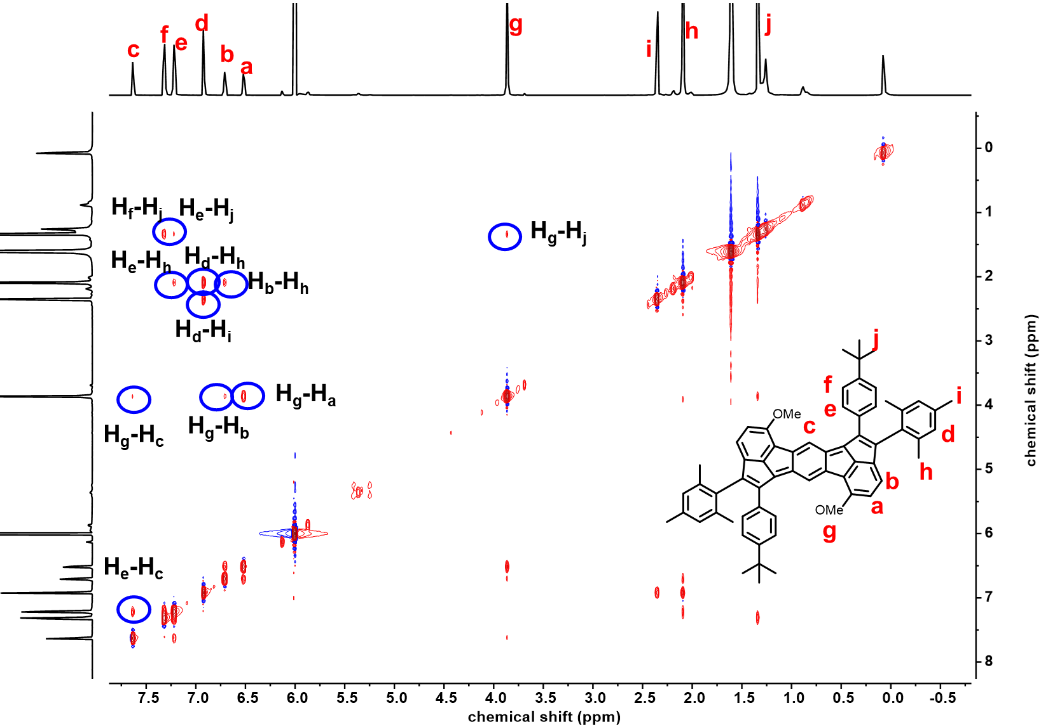


**Figure S4** The NOESY of compound **1** (700 MHz, C2D2Cl4, 298 K).


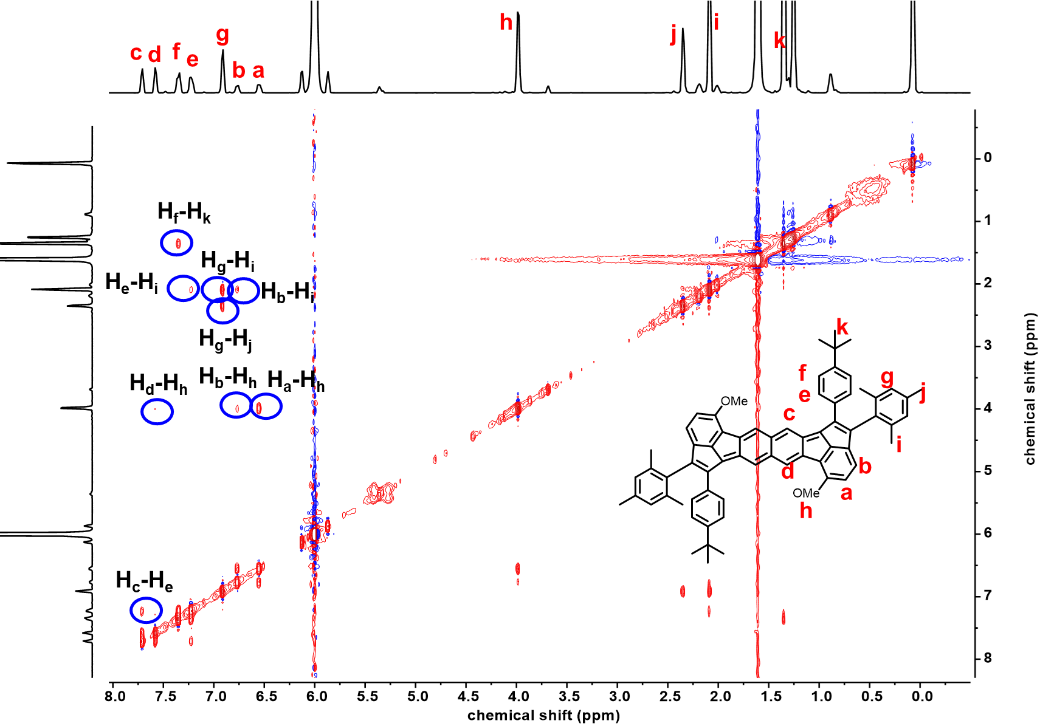


**Figure S5** The NOESY of compound **2** (700 MHz, C2D2Cl4, 298 K).


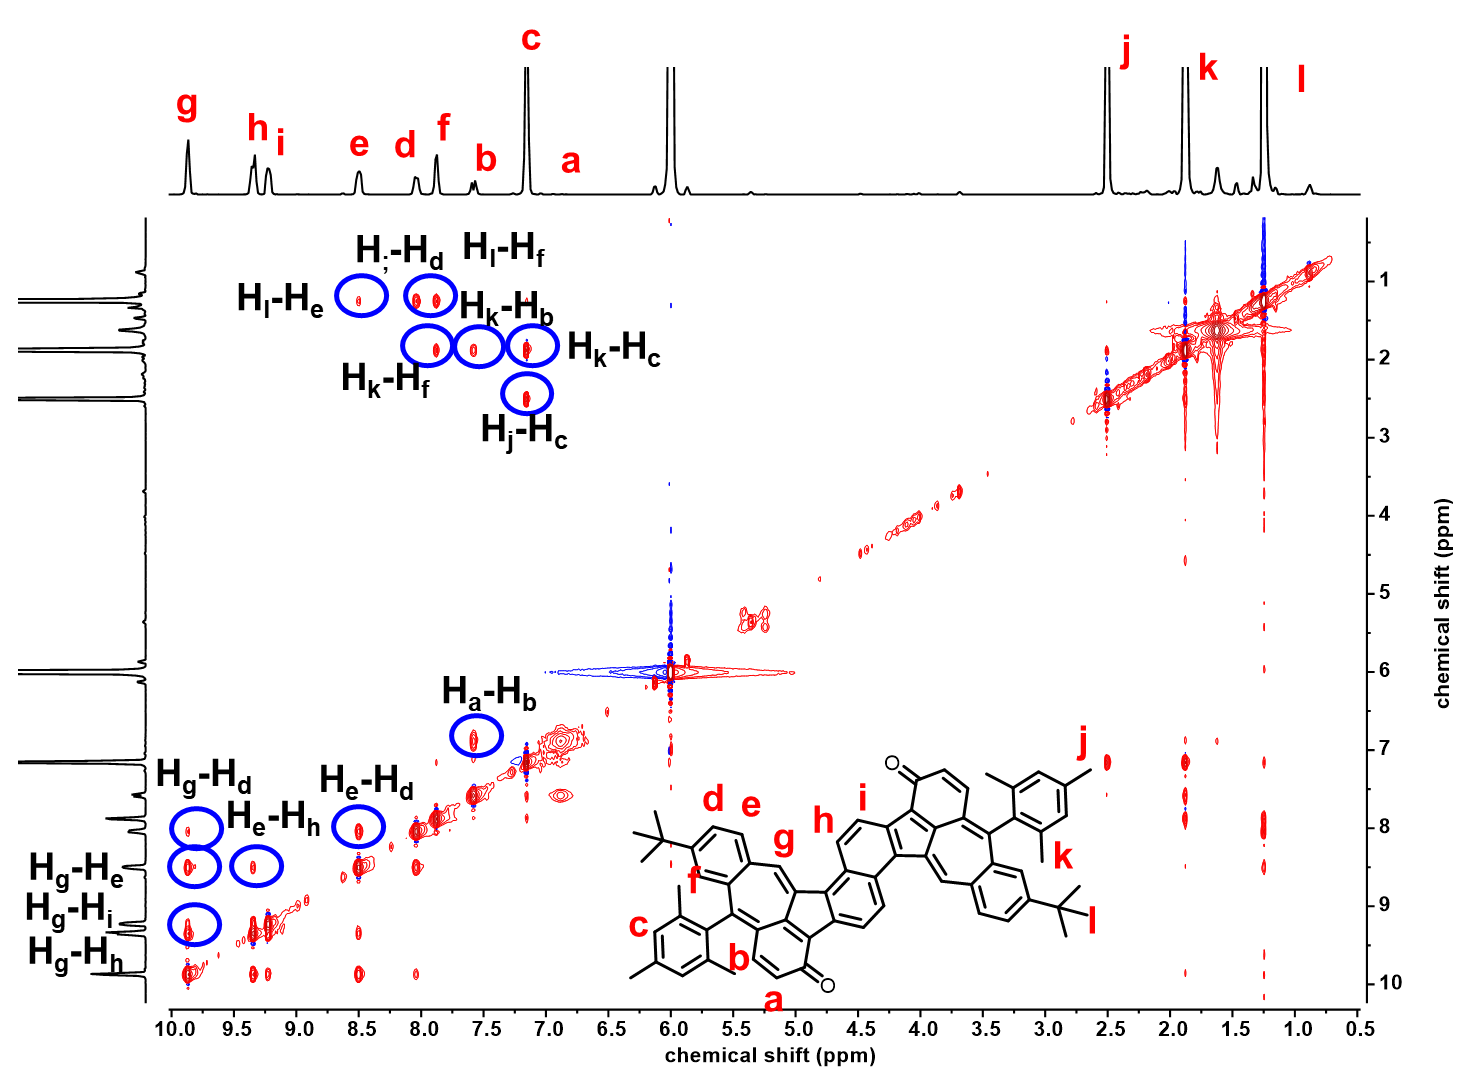


**Figure S6** The NOESY of compound **3** (700 MHz, C2D2Cl4, 298 K).

4. Crystallographic data


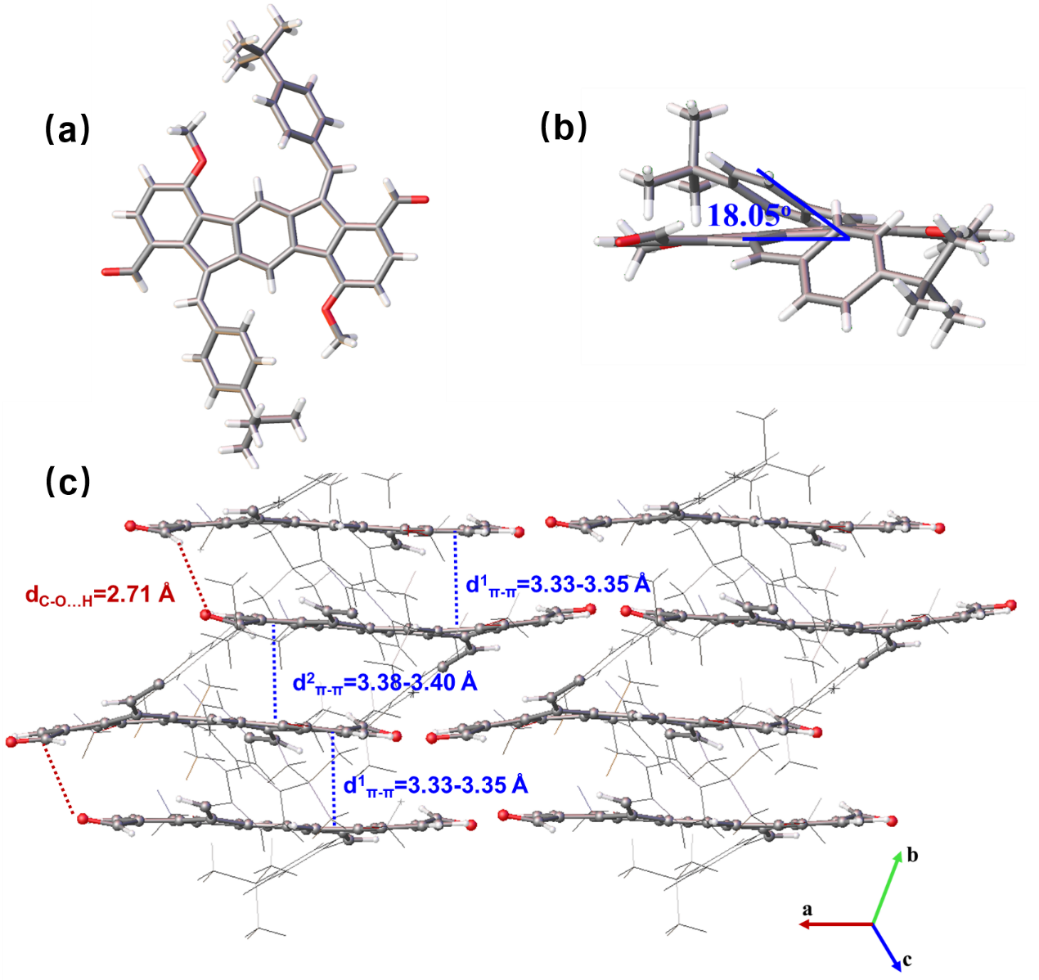


**Figure S7** X-ray single-crystal crystallographic analysis. Structure of (a) top view, (b) side view and (c) intermolecular packing mode and interaction of intermediate **7**. Displacement ellipsoids are drawn at 50% probability level. The solvent molecule of CHCl3 was omitted for clarity.


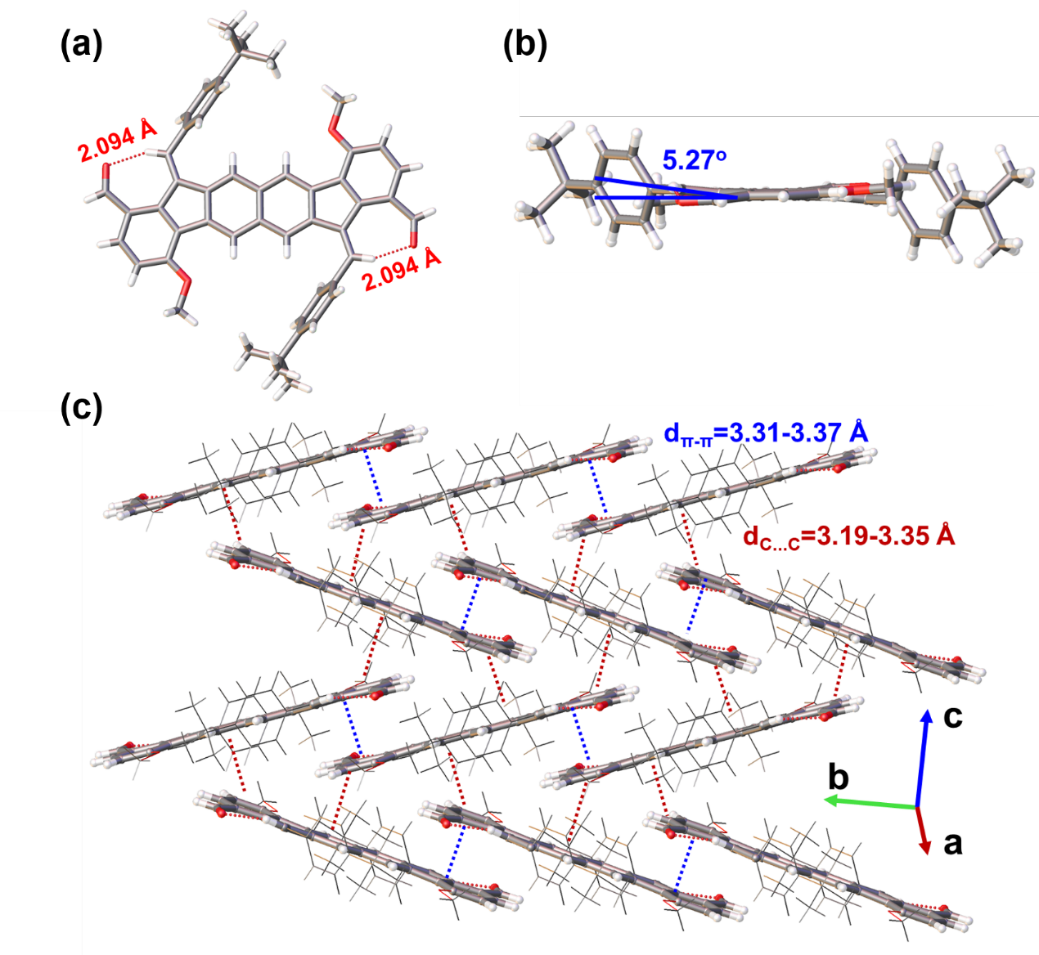


**Figure S8** X-ray single-crystal crystallographic analysis. Structure of (a) top view, (b) side view and (c) intermolecular packing mode and interaction of intermediate **13**. Displacement ellipsoids are drawn at 50% probability level.


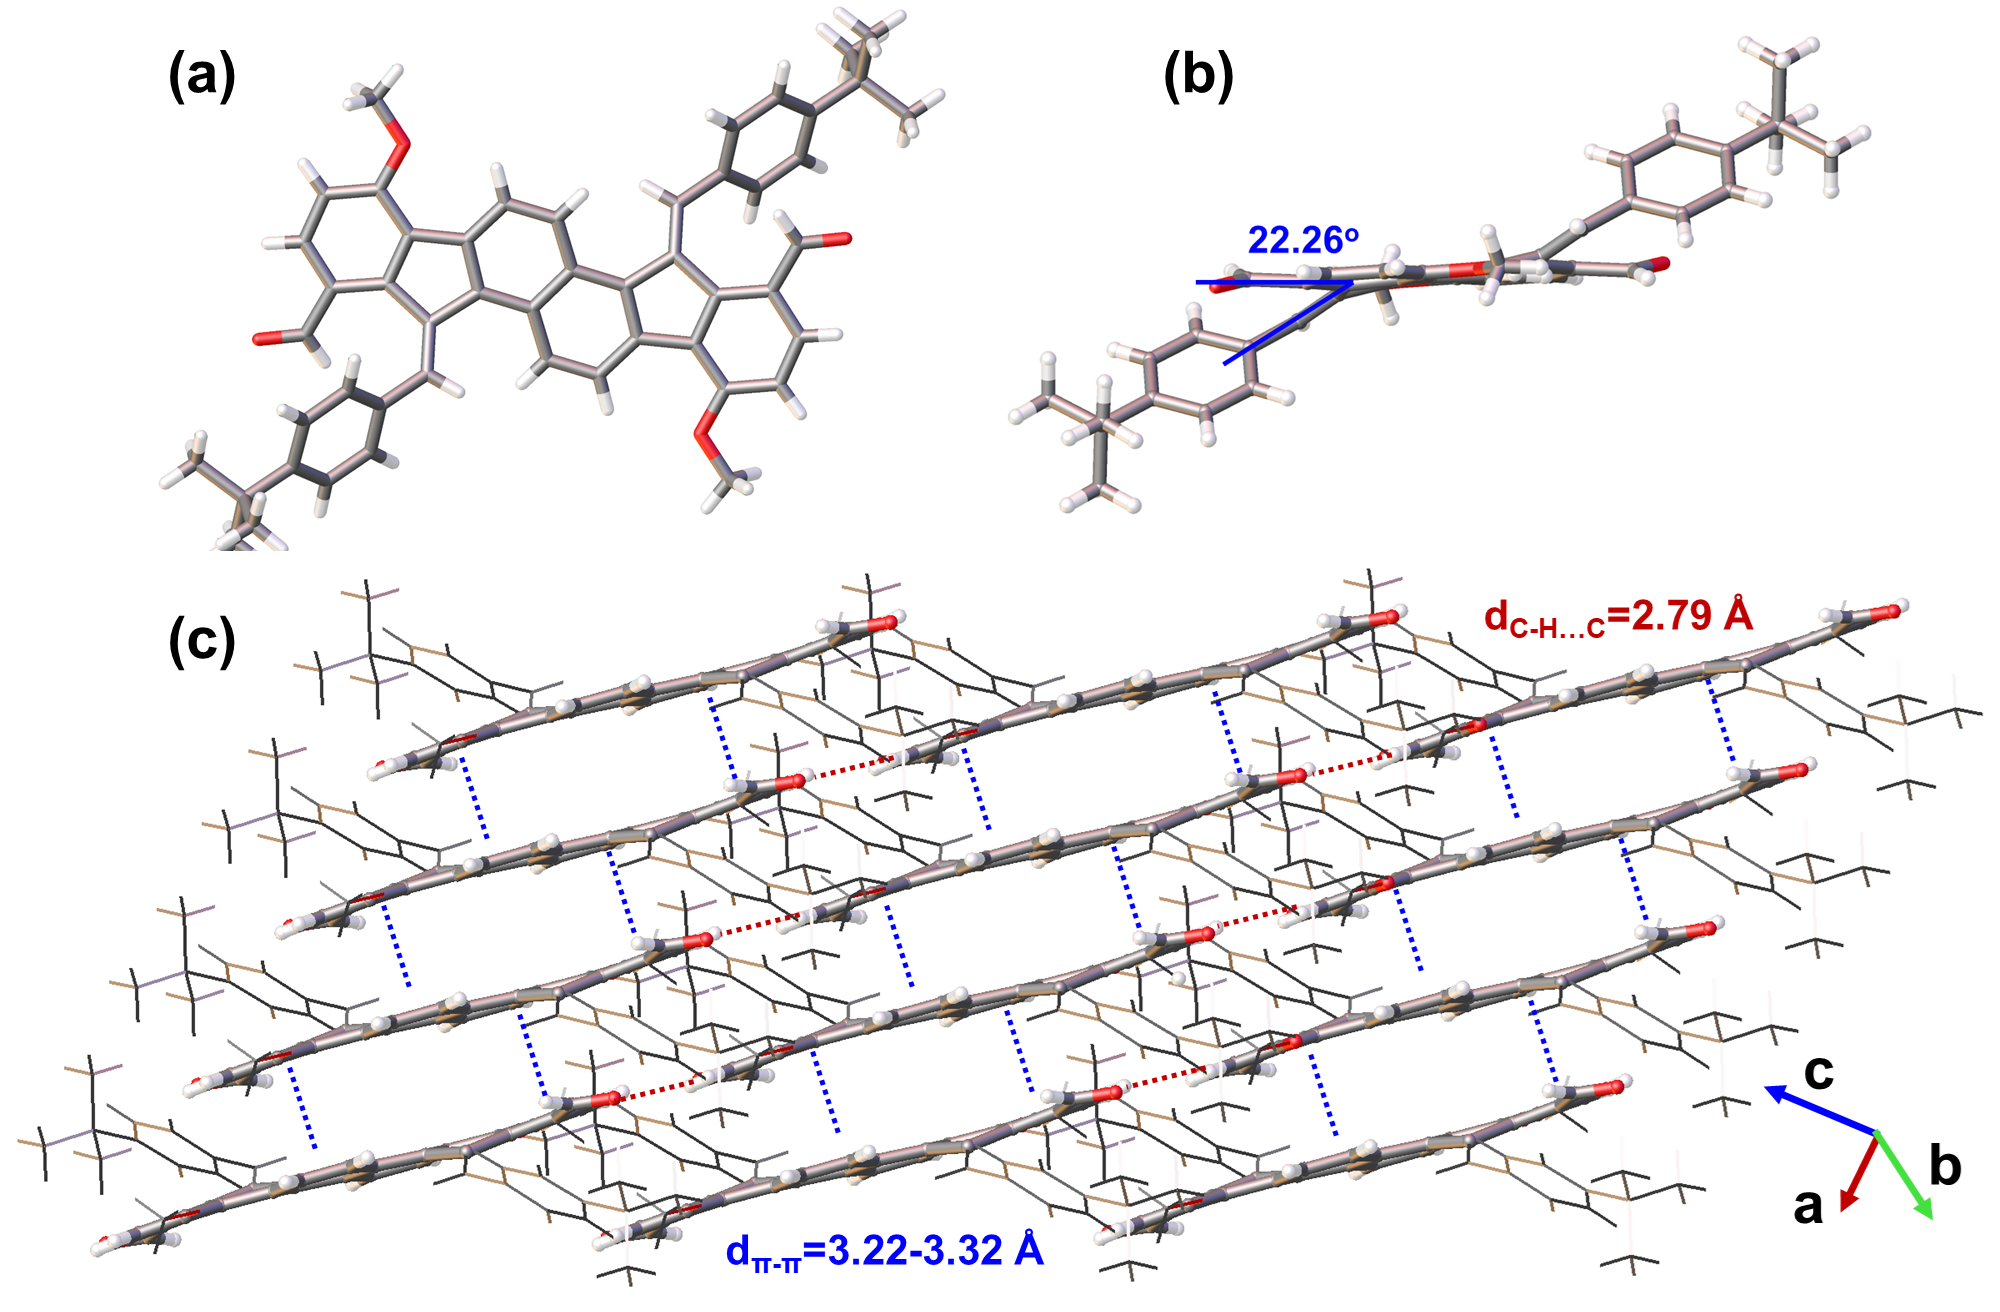


**Figure S9** X-ray single-crystal crystallographic analysis. Structure of (a) top view, (b) side view and (c) intermolecular packing mode and interaction of intermediate **19**. Displacement ellipsoids are drawn at 50% probability level.

**Table S1** Crystallographic data of compound **7**.

| Compound | **7** |
| --- | --- |
| CCDC deposition NO. | 2478865 |
| Empirical formula | C94H86Cl6O8 |
| Formula weight | 1556.32 |
| Temperature/K | 170 (1) |
| Crystal system | triclinic |
| Space group | P-1 |
| a/Å | 14.54950(10) |
| b/Å | 15.2378(2) |
| c/Å | 19.4658(2) |
| α/° | 97.6160(10) |
| β/° | 100.2140(10) |
| γ/° | 108.7880(10) |
| Volume/Å3 | 3936.74(8) |
| Z | 2 |
| ρcalcg/cm3 | 1.313 |
| μ/mm‑1 | 2.458 |
| F(000) | 1632.0 |
| Crystal size/mm3 | 0.33× 0.23 × 0.15 |
| Radiation | CuKα (λ = 1.54184) |
| 2Θ range for data collection/° | 4.712 to 151.864 |
| Index ranges | -18 ≤ h ≤ 16, -18≤ k ≤ 19, -24 ≤ l ≤ 23 |
| Reflections collected | 56938 |
| Independent reflections | 15942 [Rint = 0.0285, Rsigma = 0.0291] |
| Data/restraints/parameters | 15942/0/989 |
| Goodness-of-fit on F2 | 1.071 |
| Final R indexes [I>=2σ (I)] | R1 = 0.0649, wR2 = 0.1821 |
| Final R indexes [all data] | R1 = 0.0739, wR2 = 0.1906 |
| Largest diff. peak/hole / e Å-3 | 1.50/-1.19 |

**Table S2** Crystallographic data of compound **13**.

| Compound | **13** |
| --- | --- |
| CCDC deposition NO. | 2478866 |
| Empirical formula | C25H22O2 |
| Formula weight | 354.42 |
| Temperature/K | 170.00 (10) |
| Crystal system | monoclinic |
| Space group | P21/c |
| a/Å | 16.3766(3) |
| b/Å | 10.38959(18) |
| c/Å | 11.4772(3) |
| α/° | 90 |
| β/° | 103.825(10) |
| γ/° | 90 |
| Volume/Å3 | 1896.22(7) |
| Z | 4 |
| ρcalcg/cm3 | 1.241 |
| μ/mm‑1 | 0.605 |
| F(000) | 752.0 |
| Crystal size/mm3 | 0.5× 0.3 × 0.1 |
| Radiation | CuKα (λ = 1.54184) |
| 2Θ range for data collection/° | 5.558 to 155.072 |
| Index ranges | -20 ≤ h ≤ 19, -11≤ k ≤ 13, -14 ≤ l ≤ 14 |
| Reflections collected | 14107 |
| Independent reflections | 3878 [Rint = 0.0264, Rsigma = 0.0257] |
| Data/restraints/parameters | 3878/0/248 |
| Goodness-of-fit on F2 | 1.066 |
| Final R indexes [I>=2σ (I)] | R1 = 0.0592, wR2 = 0.1581 |
| Final R indexes [all data] | R1 = 0.0667, wR2 = 0.1637 |
| Largest diff. peak/hole / e Å-3 | 0.71/-0.40 |

**Table S3** Crystallographic data of compound **19**.

| Compound | **19** |
| --- | --- |
| CCDC deposition NO. | 2478867 |
| Empirical formula | C25H22O2 |
| Formula weight | 354.42 |
| Temperature/K | 170.00 (3) |
| Crystal system | triclinic |
| Space group | P-1 |
| a/Å | 5.6358(3) |
| b/Å | 12.7956(6) |
| c/Å | 12.9671(5) |
| α/° | 97.392(4) |
| β/° | 93.846(4) |
| γ/° | 97.333(4) |
| Volume/Å3 | 916.43(8) |
| Z | 2 |
| ρcalcg/cm3 | 1.284 |
| μ/mm‑1 | 0.626 |
| F(000) | 376.0 |
| Crystal size/mm3 | 0.25× 0.15 × 0.12 |
| Radiation | CuKα (λ = 1.54184) |
| 2Θ range for data collection/° | 6.898 to 151.448 |
| Index ranges | -7 ≤ h ≤ 7, -15≤ k ≤ 15, -16 ≤ l ≤ 12 |
| Reflections collected | 10280 |
| Independent reflections | 3649 [Rint = 0.0338, Rsigma = 0.0420] |
| Data/restraints/parameters | 3649/0/248 |
| Goodness-of-fit on F2 | 1.089 |
| Final R indexes [I>=2σ (I)] | R1 = 0.0762, wR2 = 0.2130 |
| Final R indexes [all data] | R1 = 0.0892, wR2 = 0.2262 |
| Largest diff. peak/hole / e Å-3 | 0.42/-0.23 |

**Table S4** Crystallographic data of compound **1**.

| Compound | **1** |
| --- | --- |
| CCDC deposition NO. | 2478868 |
| Empirical formula | C32H30O |
| Formula weight | 430.56 |
| Temperature/K | 170.00 (10) |
| Crystal system | triclinic |
| Space group | P-1 |
| a/Å | 9.8909(4) |
| b/Å | 10.4826(5) |
| c/Å | 13.2687(3) |
| α/° | 108.996(3) |
| β/° | 97.316(3) |
| γ/° | 109.909(4) |
| Volume/Å3 | 1178.35(9) |
| Z | 2 |
| ρcalcg/cm3 | 1.213 |
| μ/mm‑1 | 0.543 |
| F(000) | 460.0 |
| Crystal size/mm3 | 0.1× 0.08 × 0.03 |
| Radiation | CuKα (λ = 1.54184) |
| 2Θ range for data collection/° | 7.314 to 154.992 |
| Index ranges | -12 ≤ h ≤ 12, -12≤ k ≤ 13, -16 ≤ l ≤ 16 |
| Reflections collected | 14522 |
| Independent reflections | 4796 [Rint = 0.0460, Rsigma = 0.0462] |
| Data/restraints/parameters | 4796/0/305 |
| Goodness-of-fit on F2 | 1.052 |
| Final R indexes [I>=2σ (I)] | R1 = 0.0700, wR2 = 0.1989 |
| Final R indexes [all data] | R1 = 0.0870, wR2 = 0.2173 |
| Largest diff. peak/hole / e Å-3 | 0.44/-0.24 |

**Table S5** Crystallographic data of compound **2**.

| Compound | **2** |
| --- | --- |
| CCDC deposition NO. | 2478869 |
| Empirical formula | C72H66Cl12O2 |
| Formula weight | 1388.64 |
| Temperature/K | 100.00 (10) |
| Crystal system | monoclinic |
| Space group | P21/n |
| a/Å | 15.5670(4) |
| b/Å | 13.0056(2) |
| c/Å | 18.0182(4) |
| α/° | 90 |
| β/° | 113.360(3) |
| γ/° | 90 |
| Volume/Å3 | 3348.92(14) |
| Z | 2 |
| ρcalcg/cm3 | 1.377 |
| μ/mm‑1 | 4.897 |
| F(000) | 1436.0 |
| Crystal size/mm3 | 0.2× 0.12 × 0.08 |
| Radiation | CuKα (λ = 1.54184) |
| 2Θ range for data collection/° | 6.372 to 155.974 |
| Index ranges | -19 ≤ h ≤ 19, -9≤ k ≤ 16, -22 ≤ l ≤ 22 |
| Reflections collected | 23526 |
| Independent reflections | 6916 [Rint = 0.0440, Rsigma = 0.0413] |
| Data/restraints/parameters | 6916/0/395 |
| Goodness-of-fit on F2 | 1.063 |
| Final R indexes [I>=2σ (I)] | R1 = 0.0592, wR2 = 0.1578 |
| Final R indexes [all data] | R1 = 0.0708, wR2 = 0.1652 |
| Largest diff. peak/hole / e Å-3 | 1.36/-0.85 |

**Table S6** Crystallographic data of compound **3**.

| Compound | **3** |
| --- | --- |
| CCDC deposition NO. | 2478870 |
| Empirical formula | C198H168O6 |
| Formula weight | 2643.31 |
| Temperature/K | 169.97 (12) |
| Crystal system | triclinic |
| Space group | P-1 |
| a/Å | 18.9545(5) |
| b/Å | 20.8030(7) |
| c/Å | 21.5827(6) |
| α/° | 88.929(2) |
| β/° | 65.138(3) |
| γ/° | 80.456(3) |
| Volume/Å3 | 7602.3(4) |
| Z | 2 |
| ρcalcg/cm3 | 1.155 |
| μ/mm‑1 | 0.519 |
| F(000) | 2808.0 |
| Crystal size/mm3 | 0.2× 0.14 × 0.005 |
| Radiation | CuKα (λ = 1.54184) |
| 2Θ range for data collection/° | 4.314 to 151.922 |
| Index ranges | -23 ≤ h ≤ 23, -25 ≤ k ≤ 26, -26 ≤ l ≤ 26 |
| Reflections collected | 98493 |
| Independent reflections | 30211 [Rint = 0.1595, Rsigma = 0.1264] |
| Data/restraints/parameters | 30211/0/1874 |
| Goodness-of-fit on F2 | 0.963 |
| Final R indexes [I>=2σ (I)] | R1 = 0.0746, wR2 = 0.1791 |
| Final R indexes [all data] | R1 = 0.1599, wR2 = 0.2221 |
| Largest diff. peak/hole / e Å-3 | 0.40/-0.24 |

5. Thermogravimetric analysis (TGA) analysis


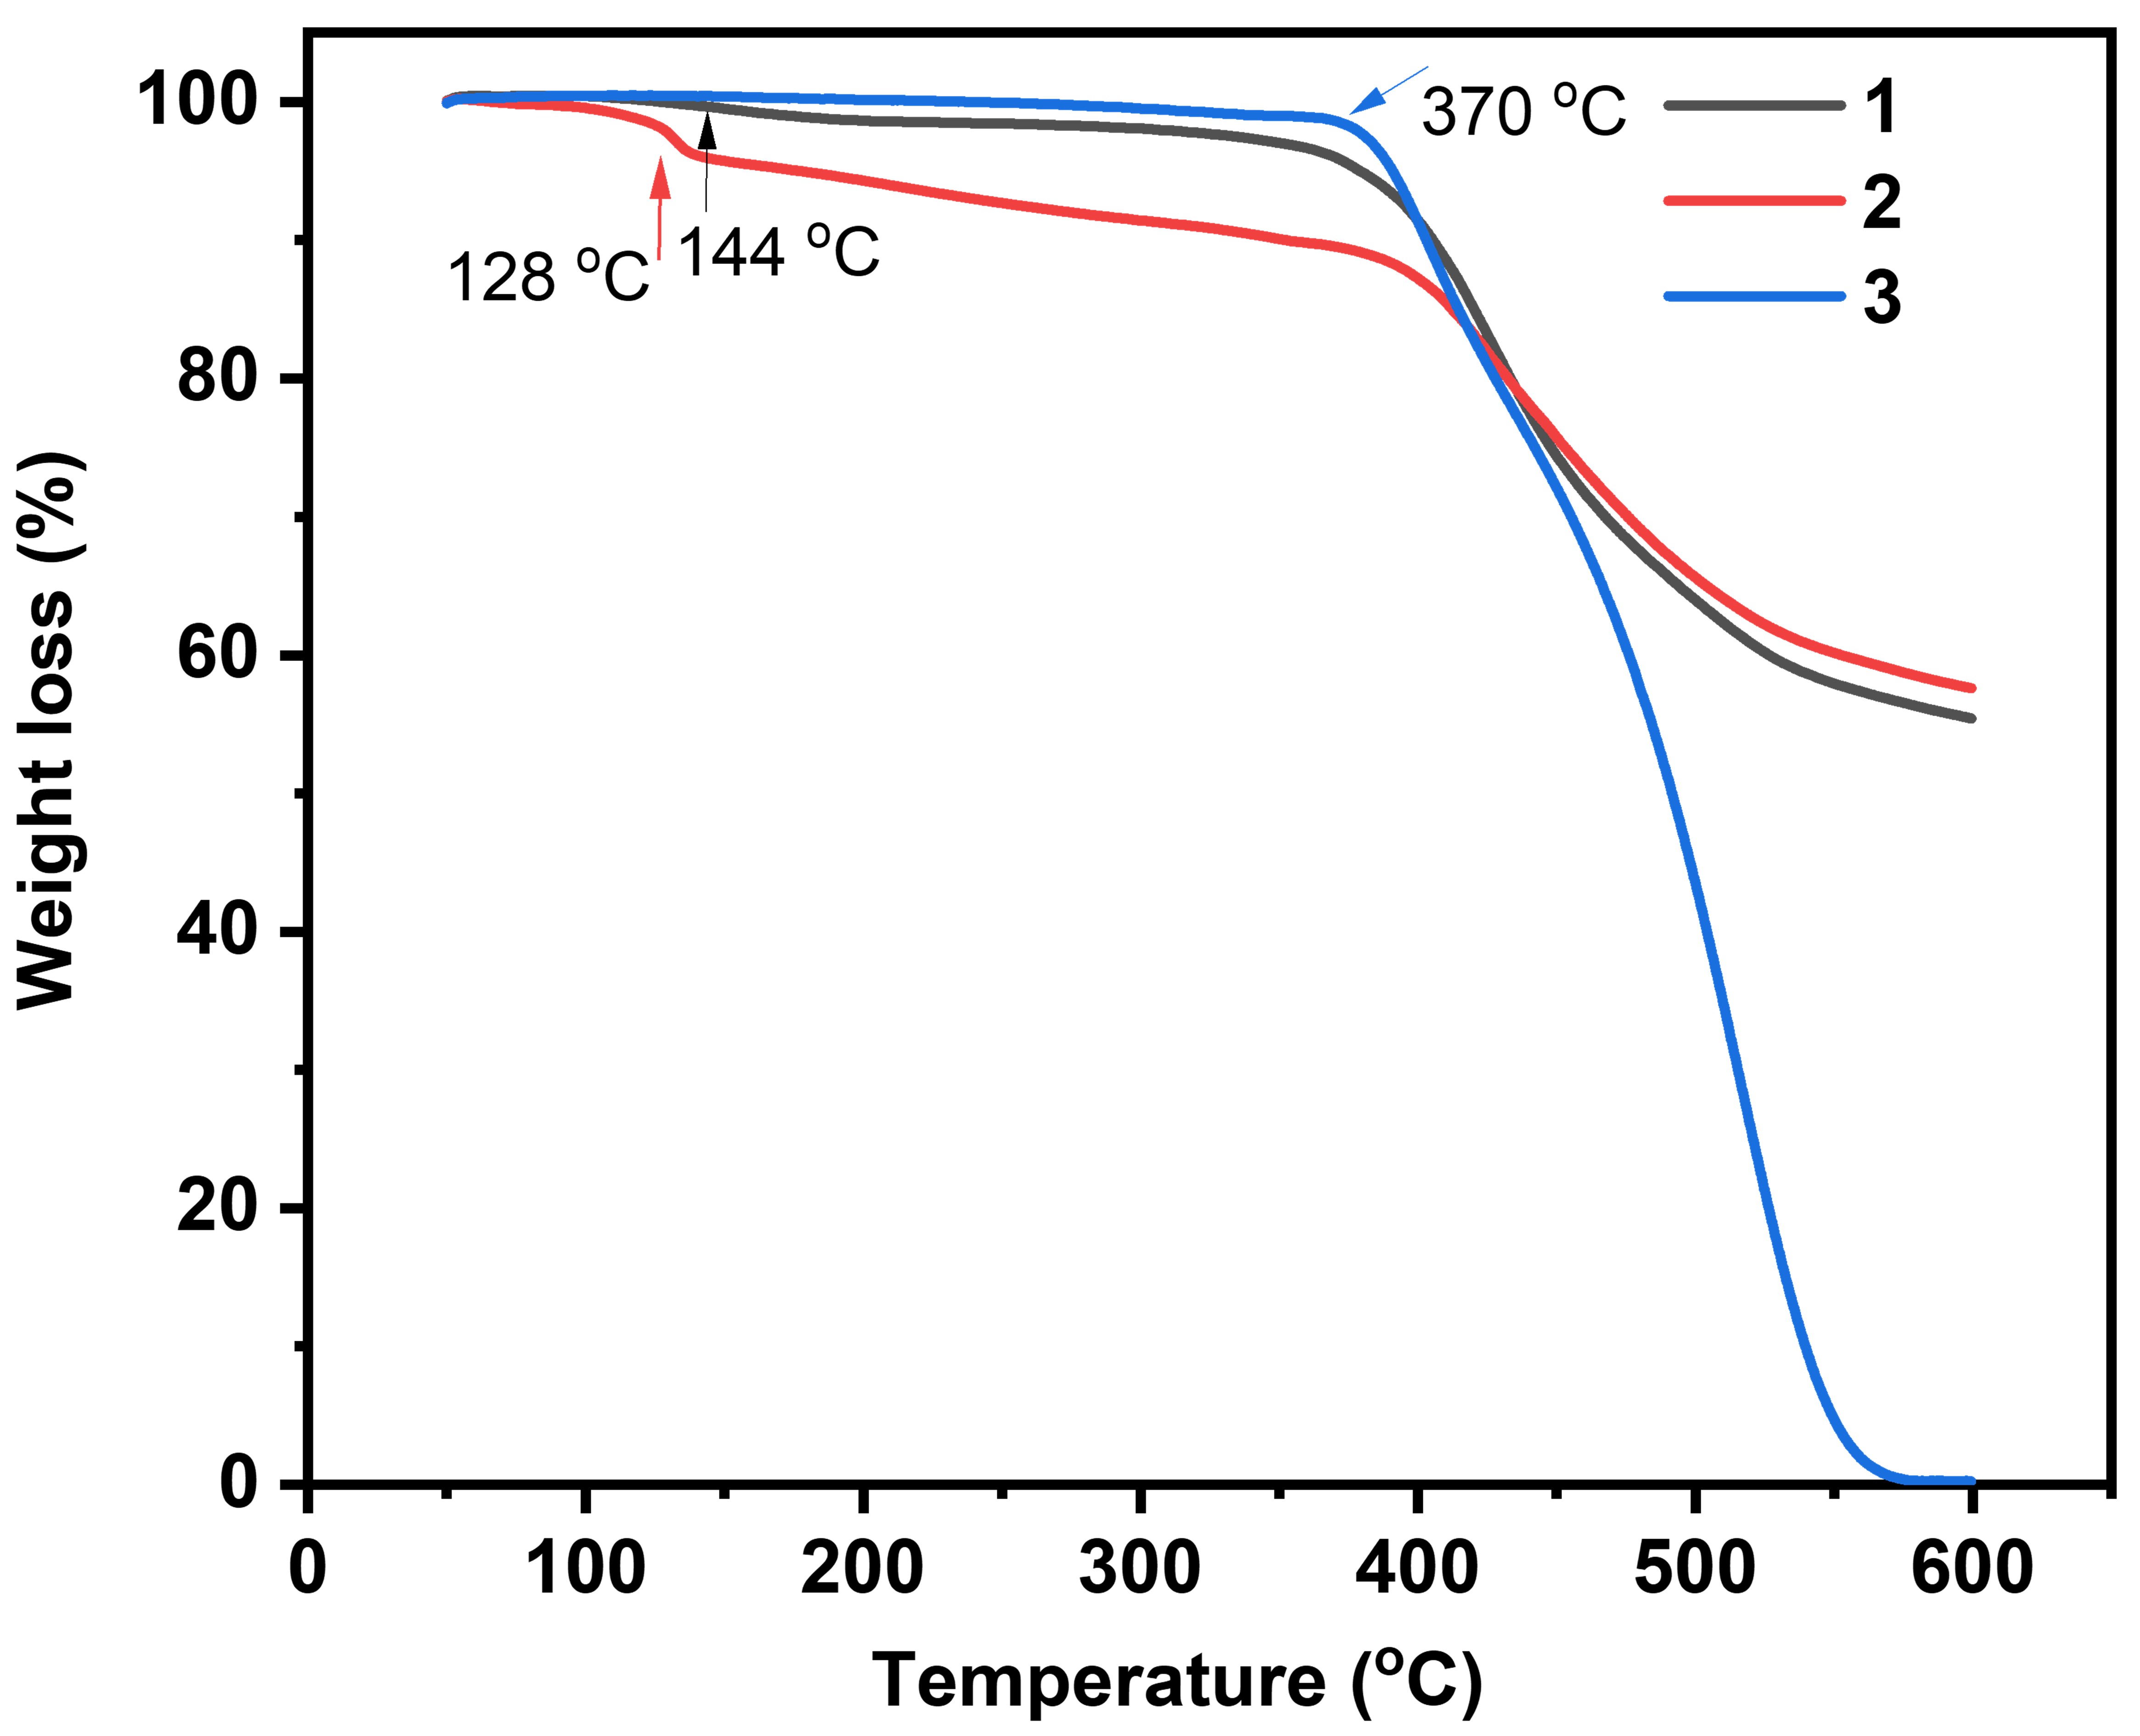


**Figure S10** TGA curves of **1**, **2** and **3**; heating rate: 10 oC/min from 50 oC to 600 oC under nitrogen atmosphere.

6. Calculations on electronic properties


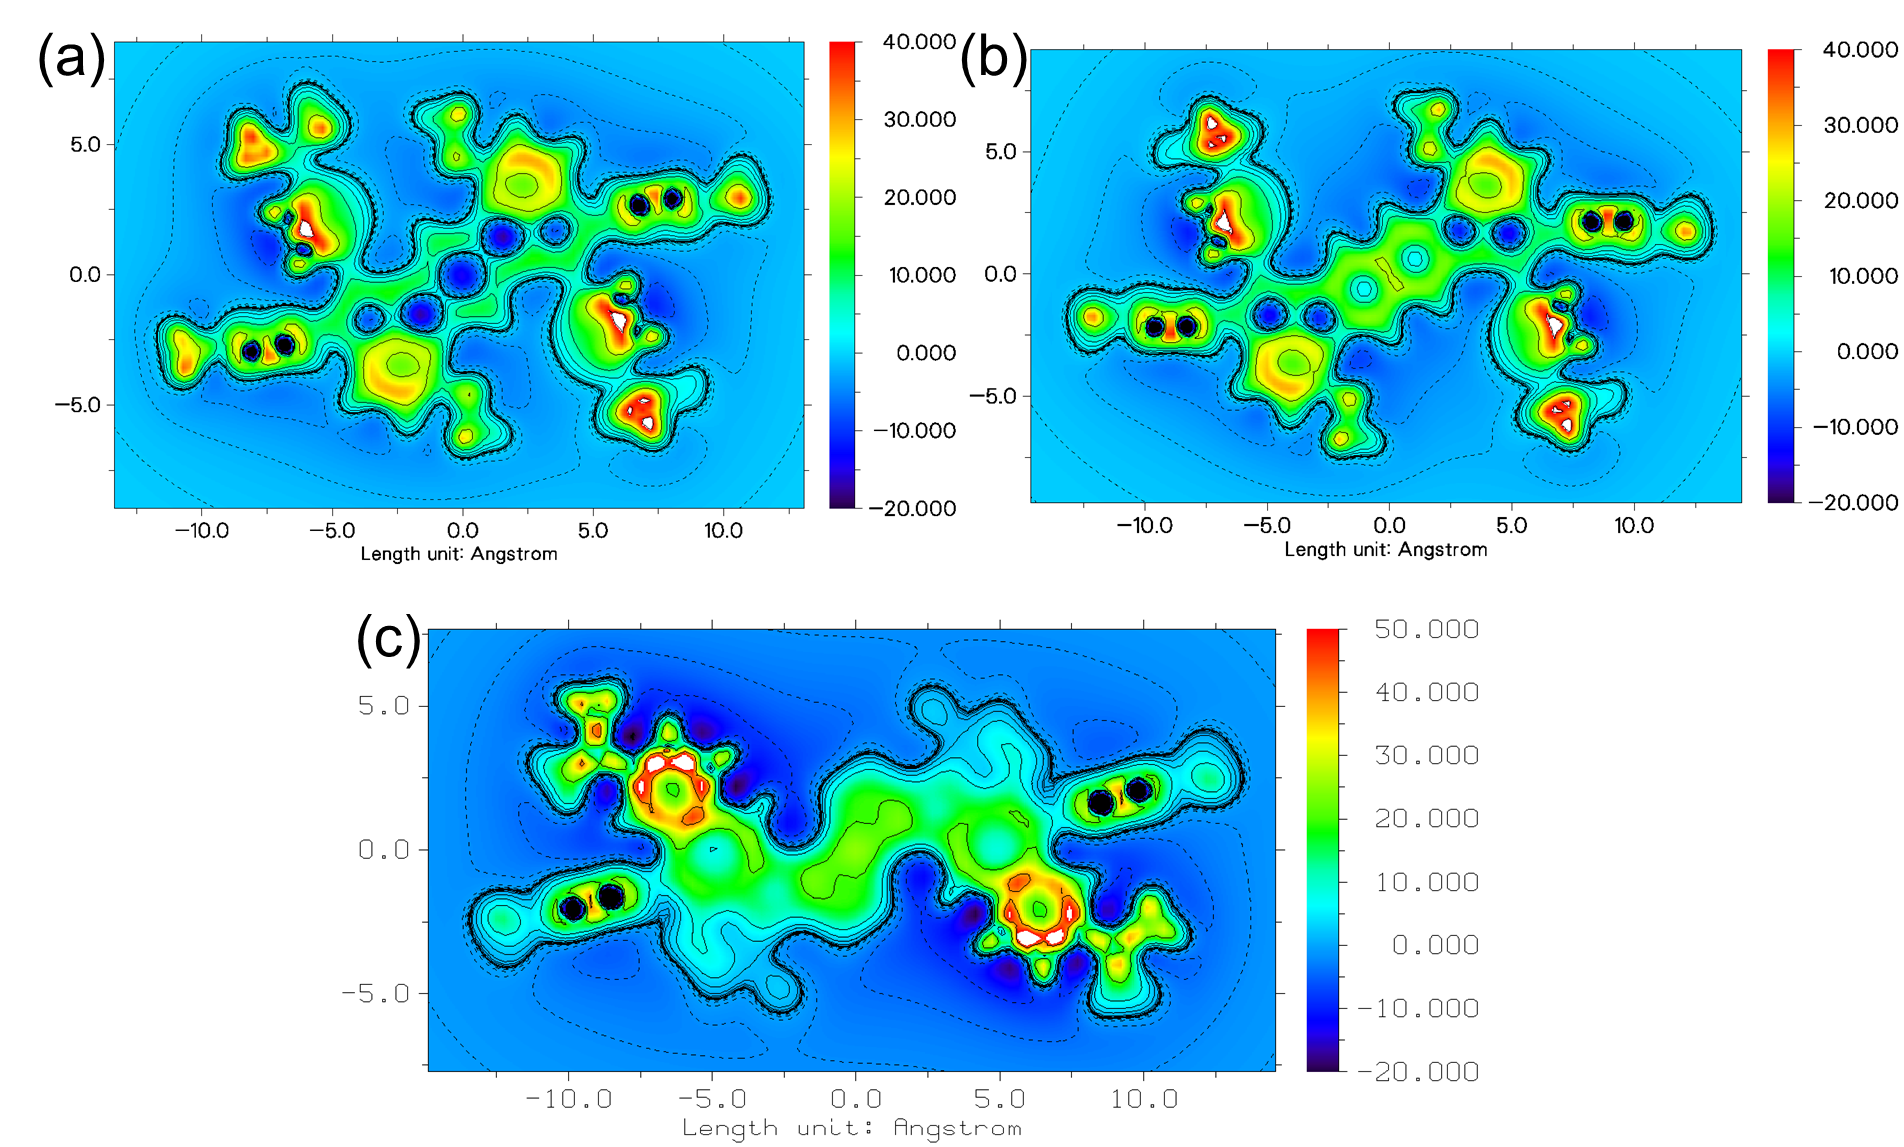


**Figure S11** Isotropic Chemical Shielding Surface at 1 Å of Z axis (ICSS(1)zz) for (a) **1**, (b) **2** and (c) **3**.


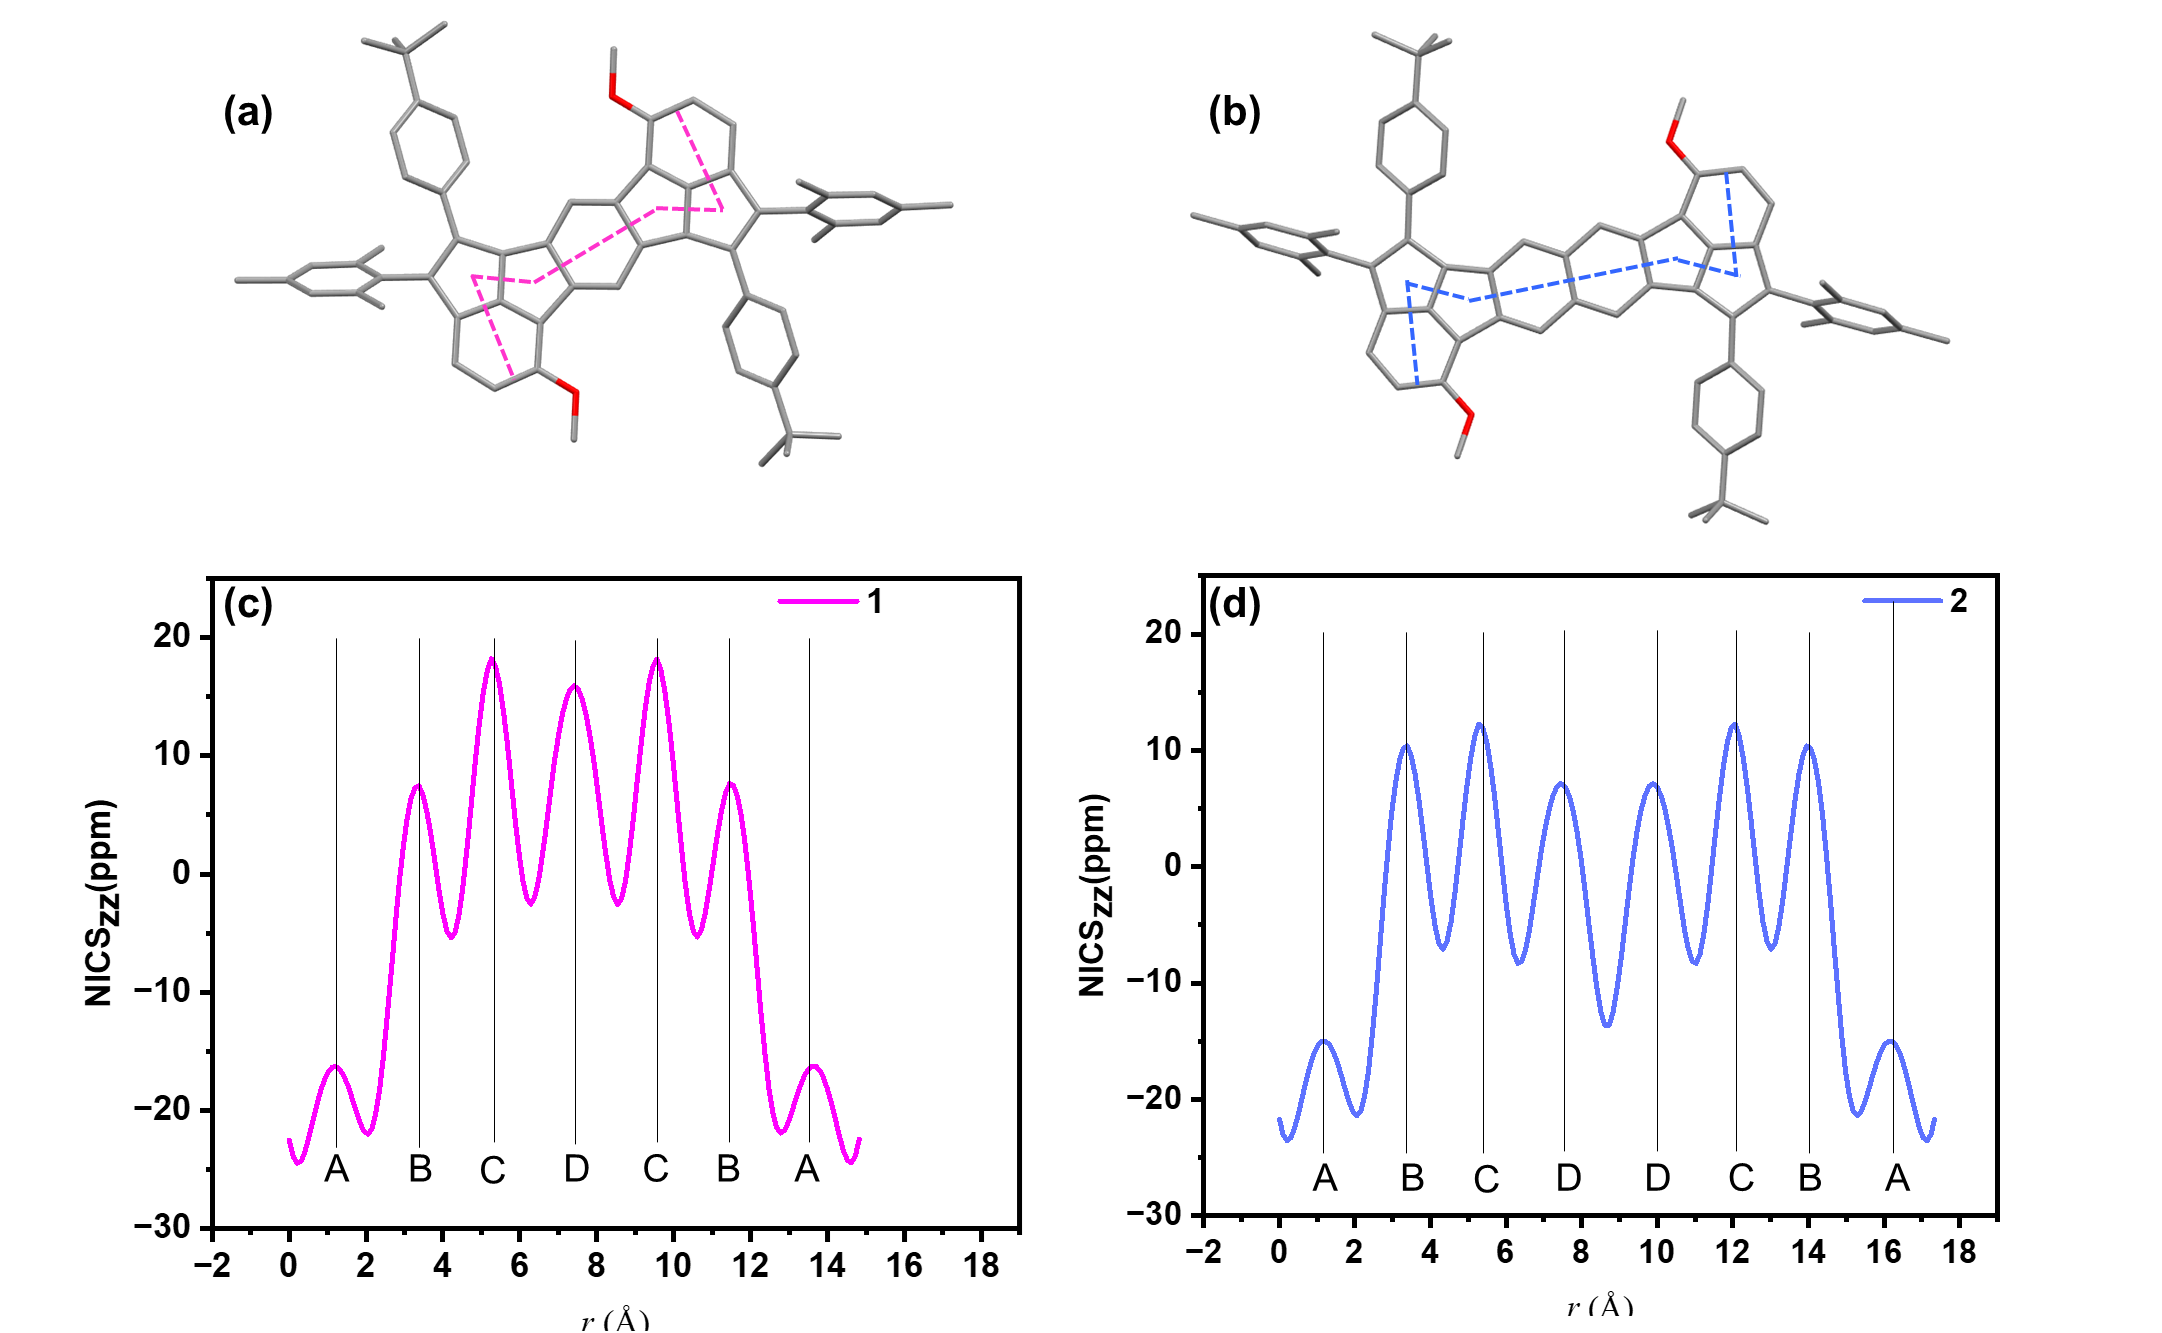


**Figure S12** The NICS-XY scan lines of two antiaromatic compounds of (a) **1** and (b) **2**. The corresponding NICS values of (c) **1** and (d) **2** along the scan lines


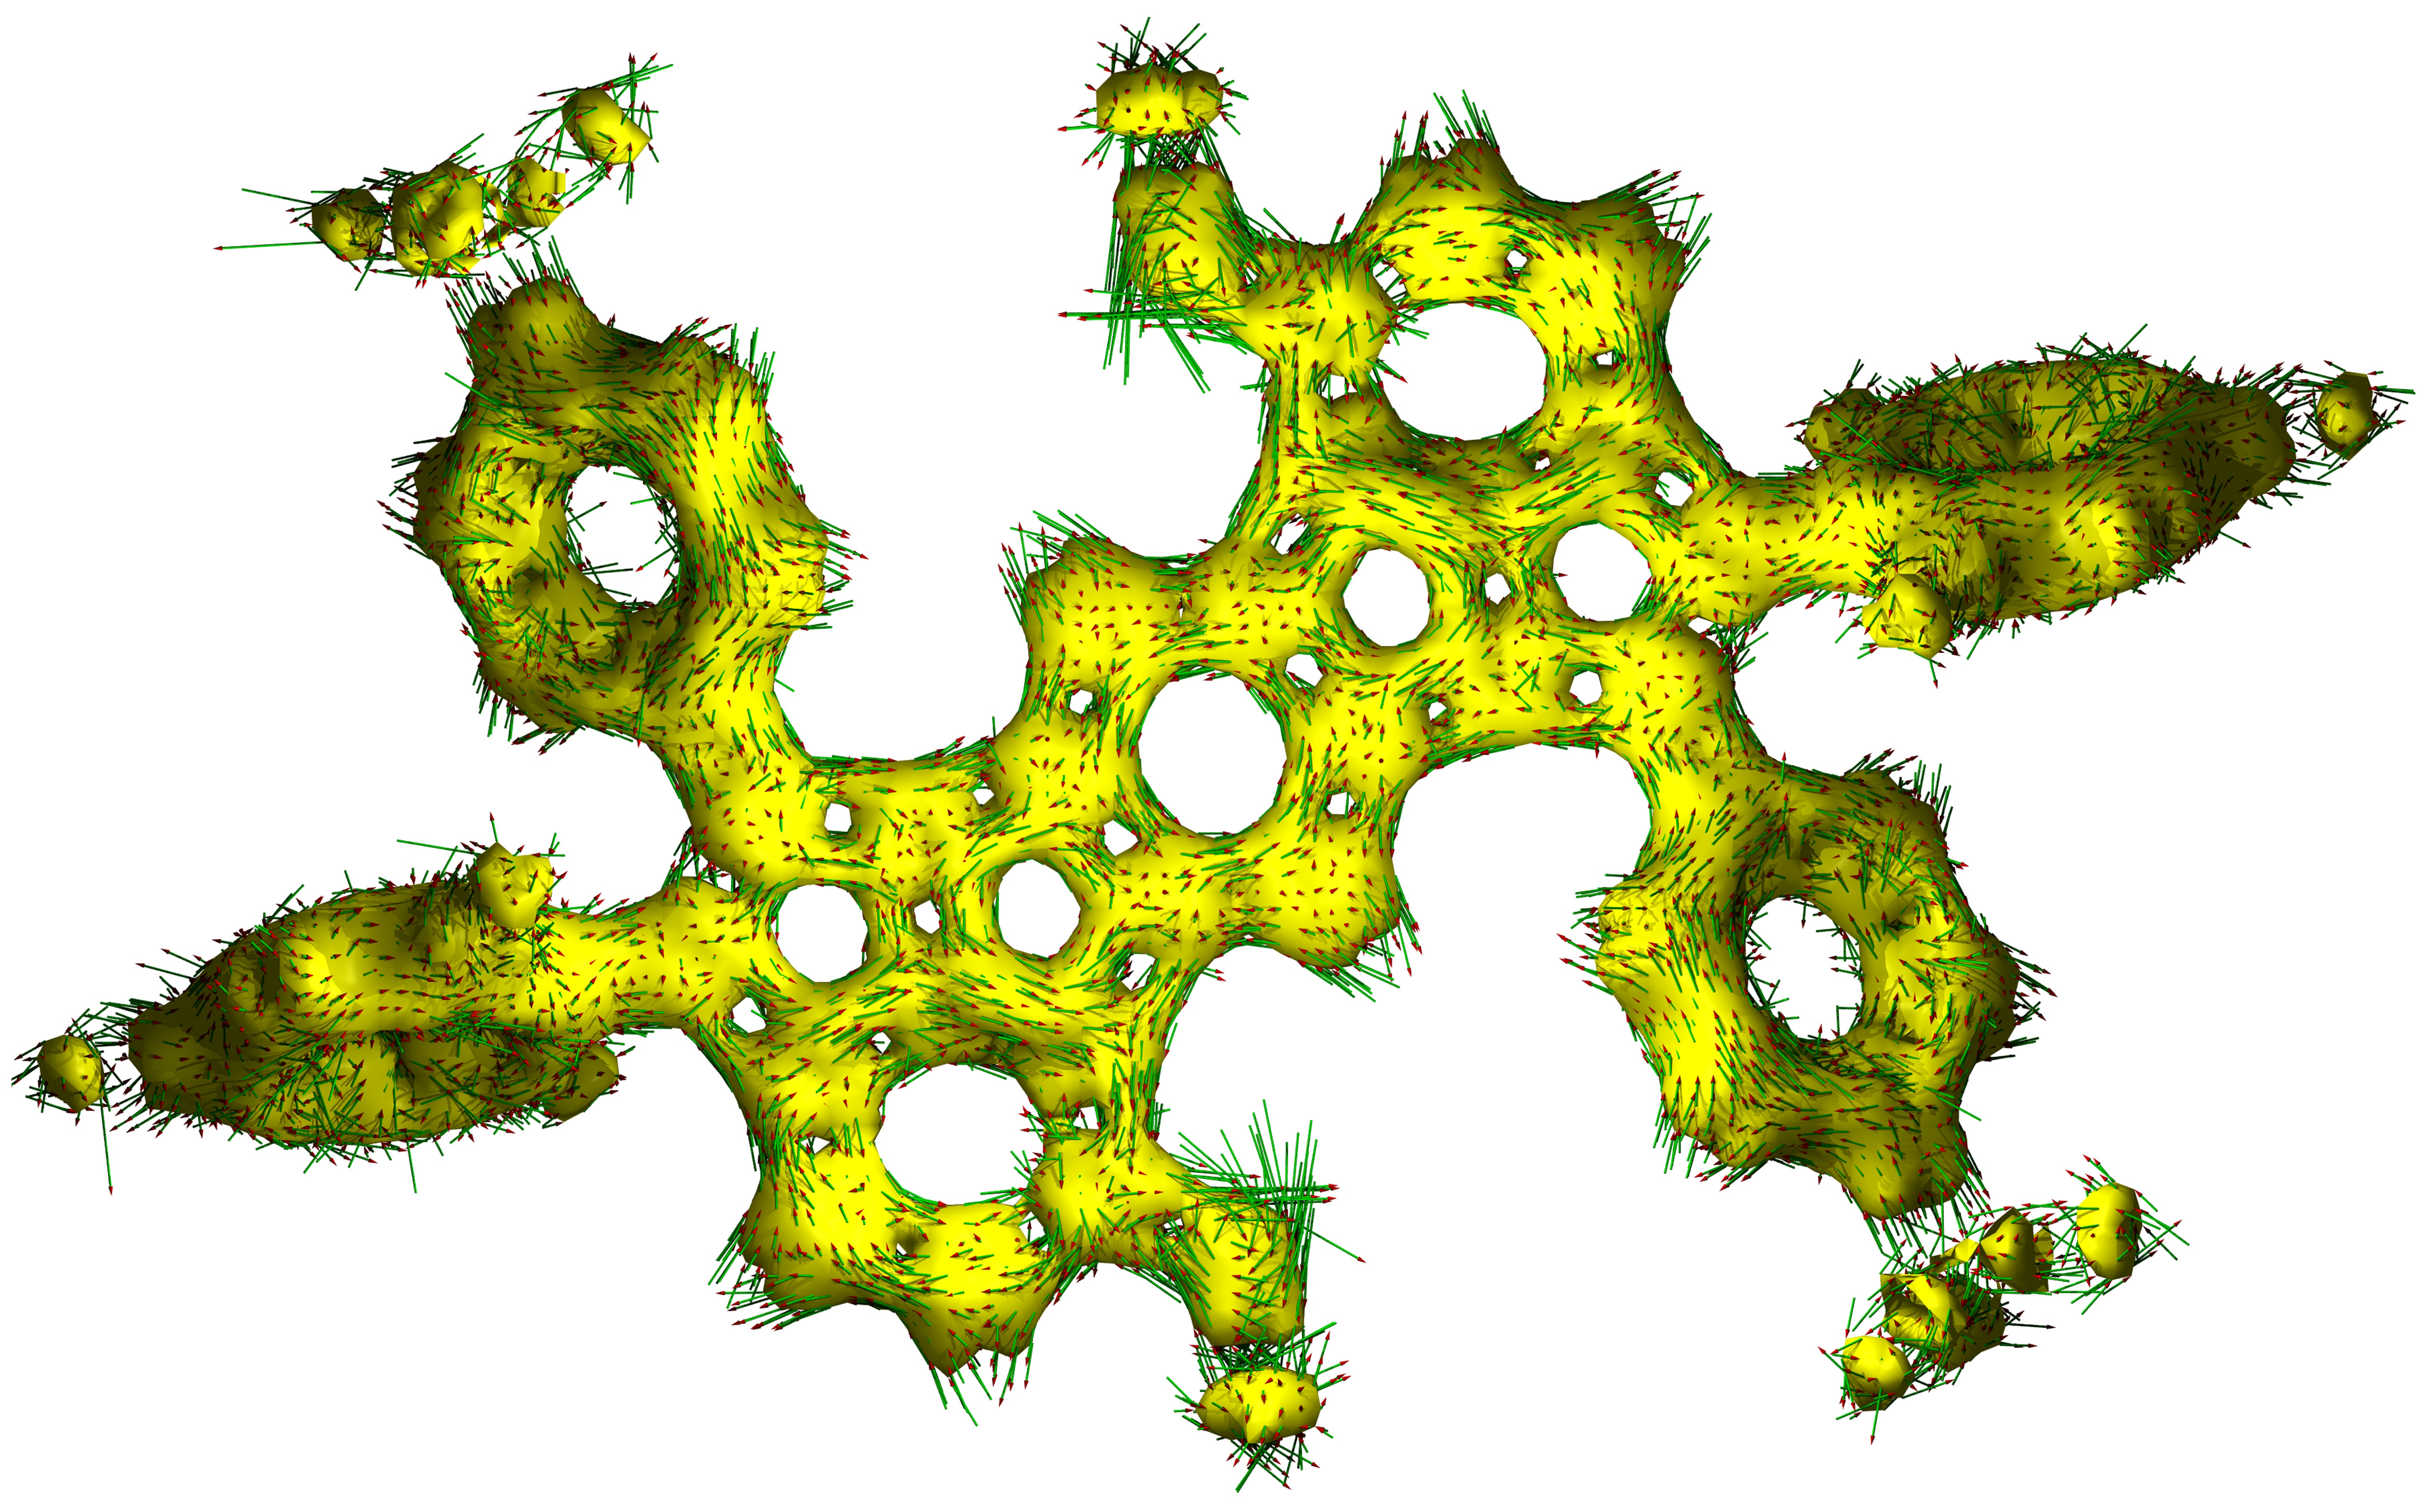


**Figure S13** The calculated ACID plots of compound **1** (closed-shell state)


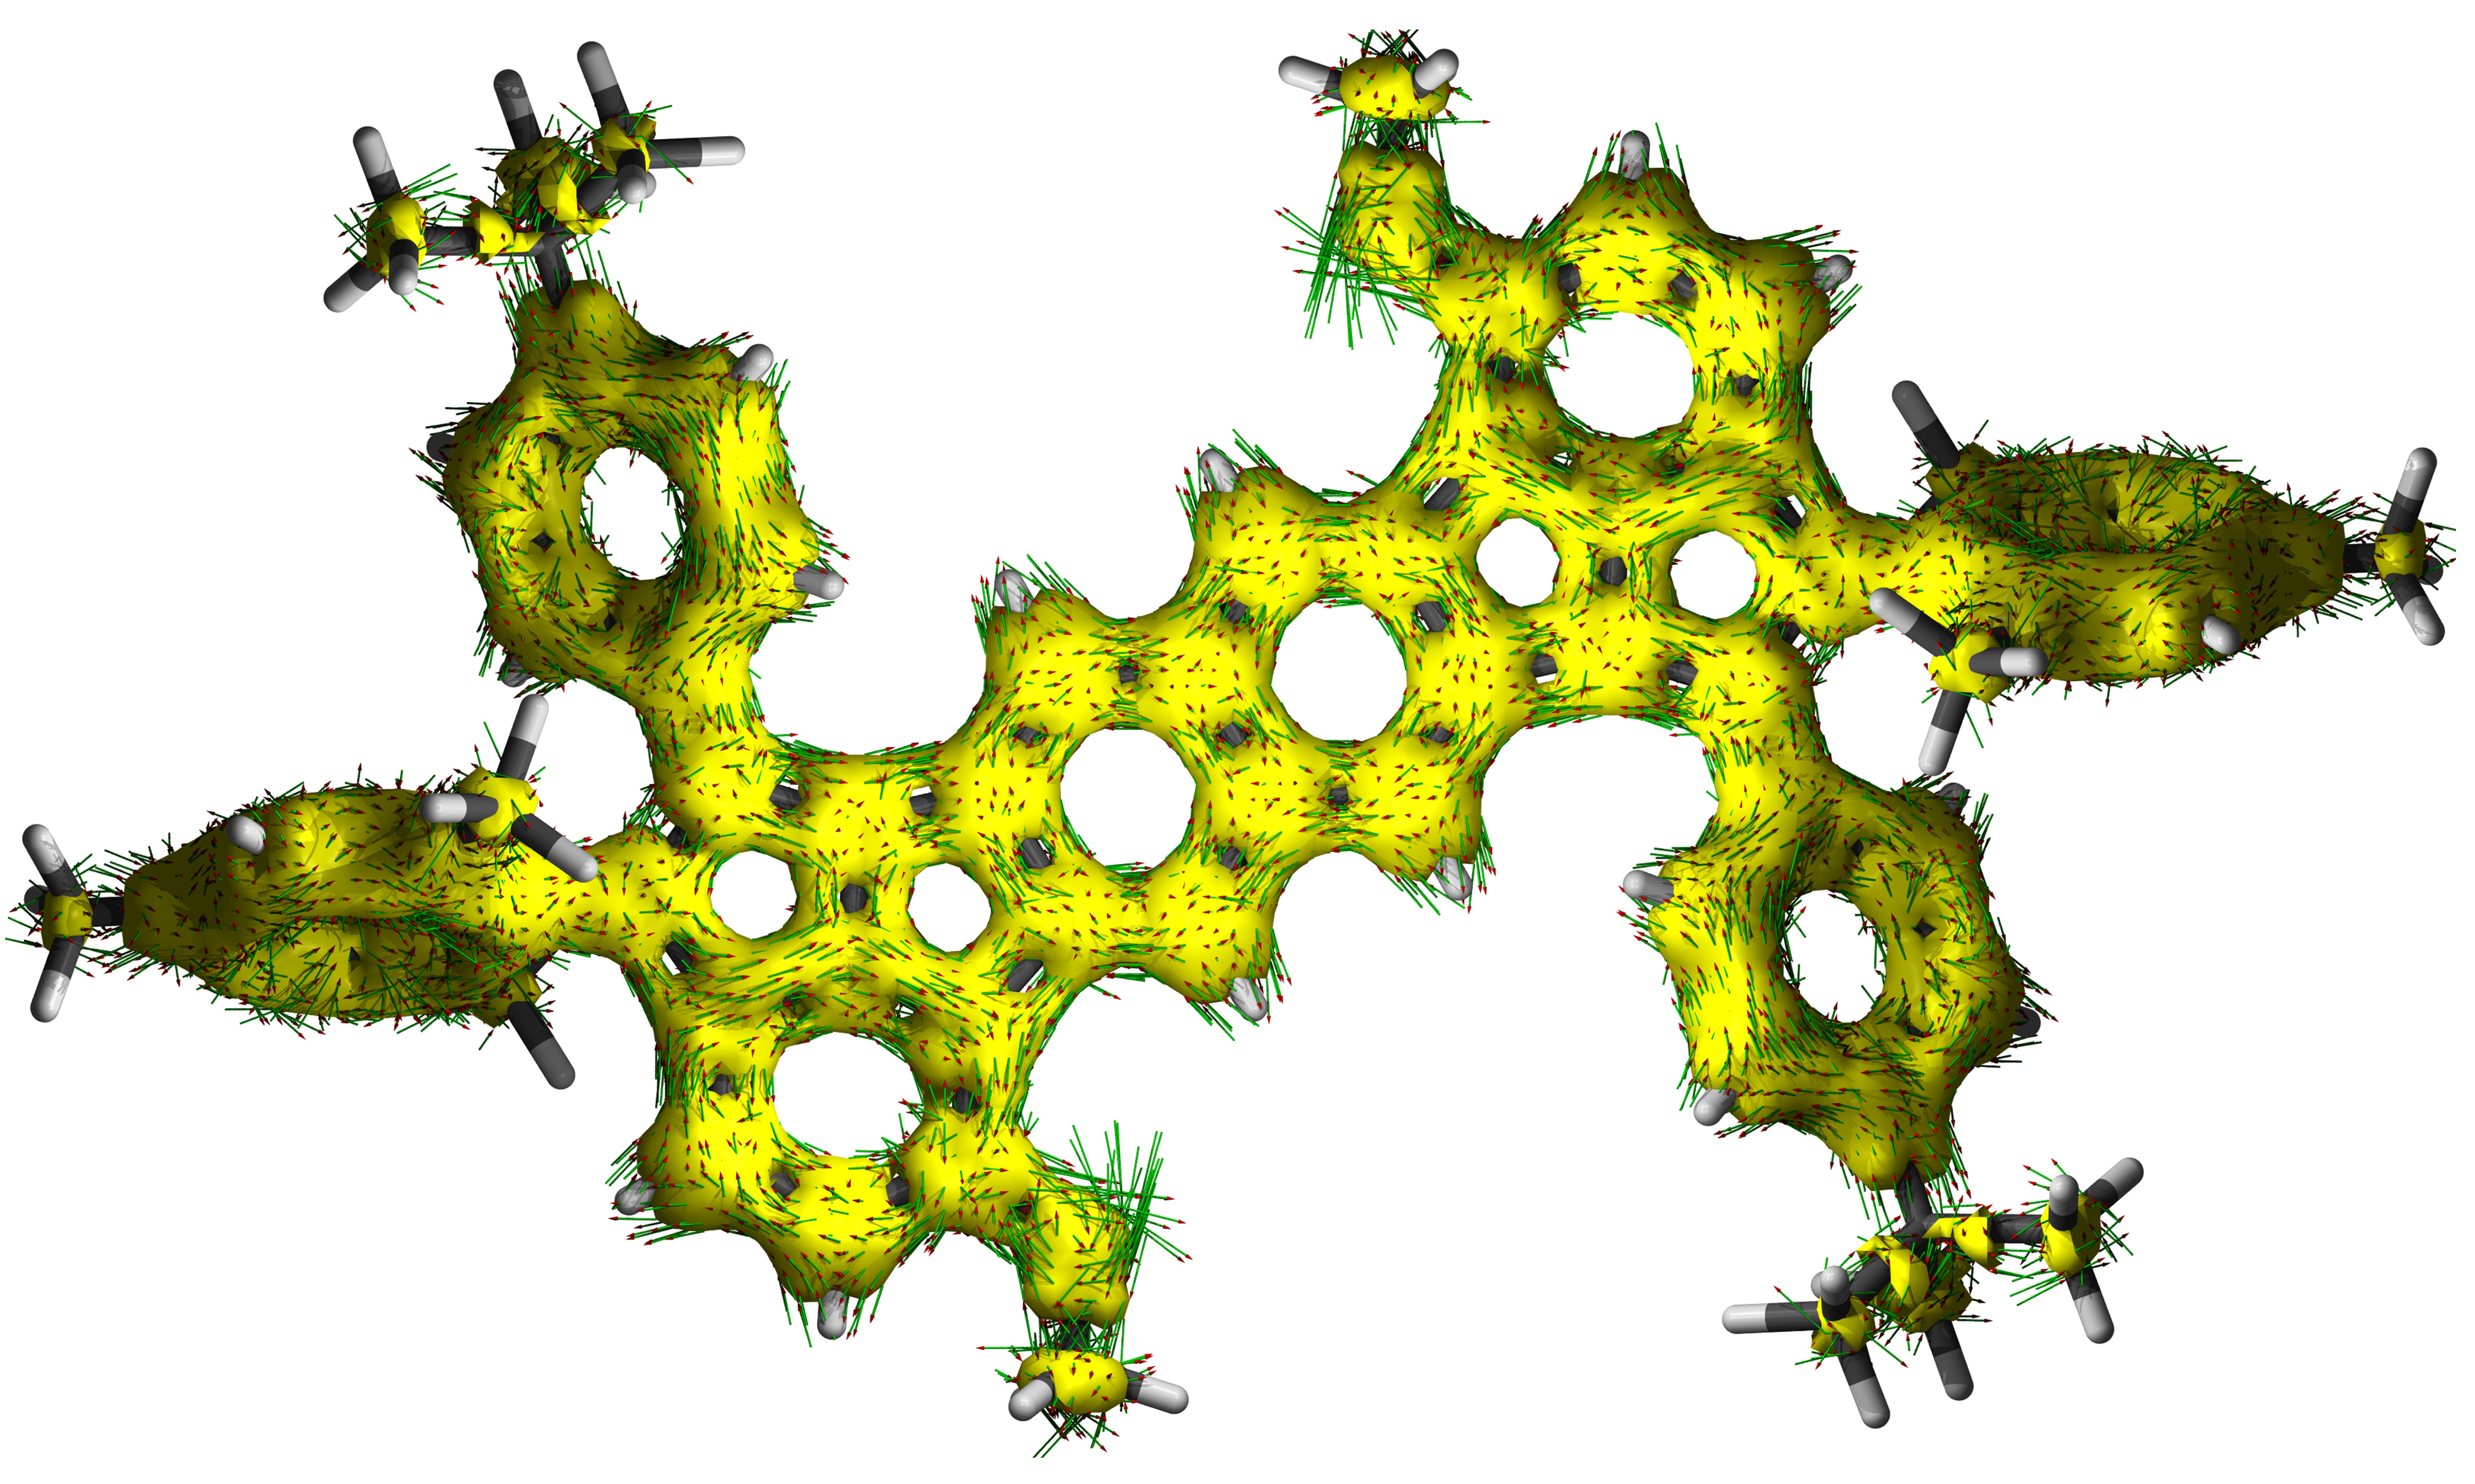


**Figure S14** The calculated ACID plots of compound **2** (open-shell state)


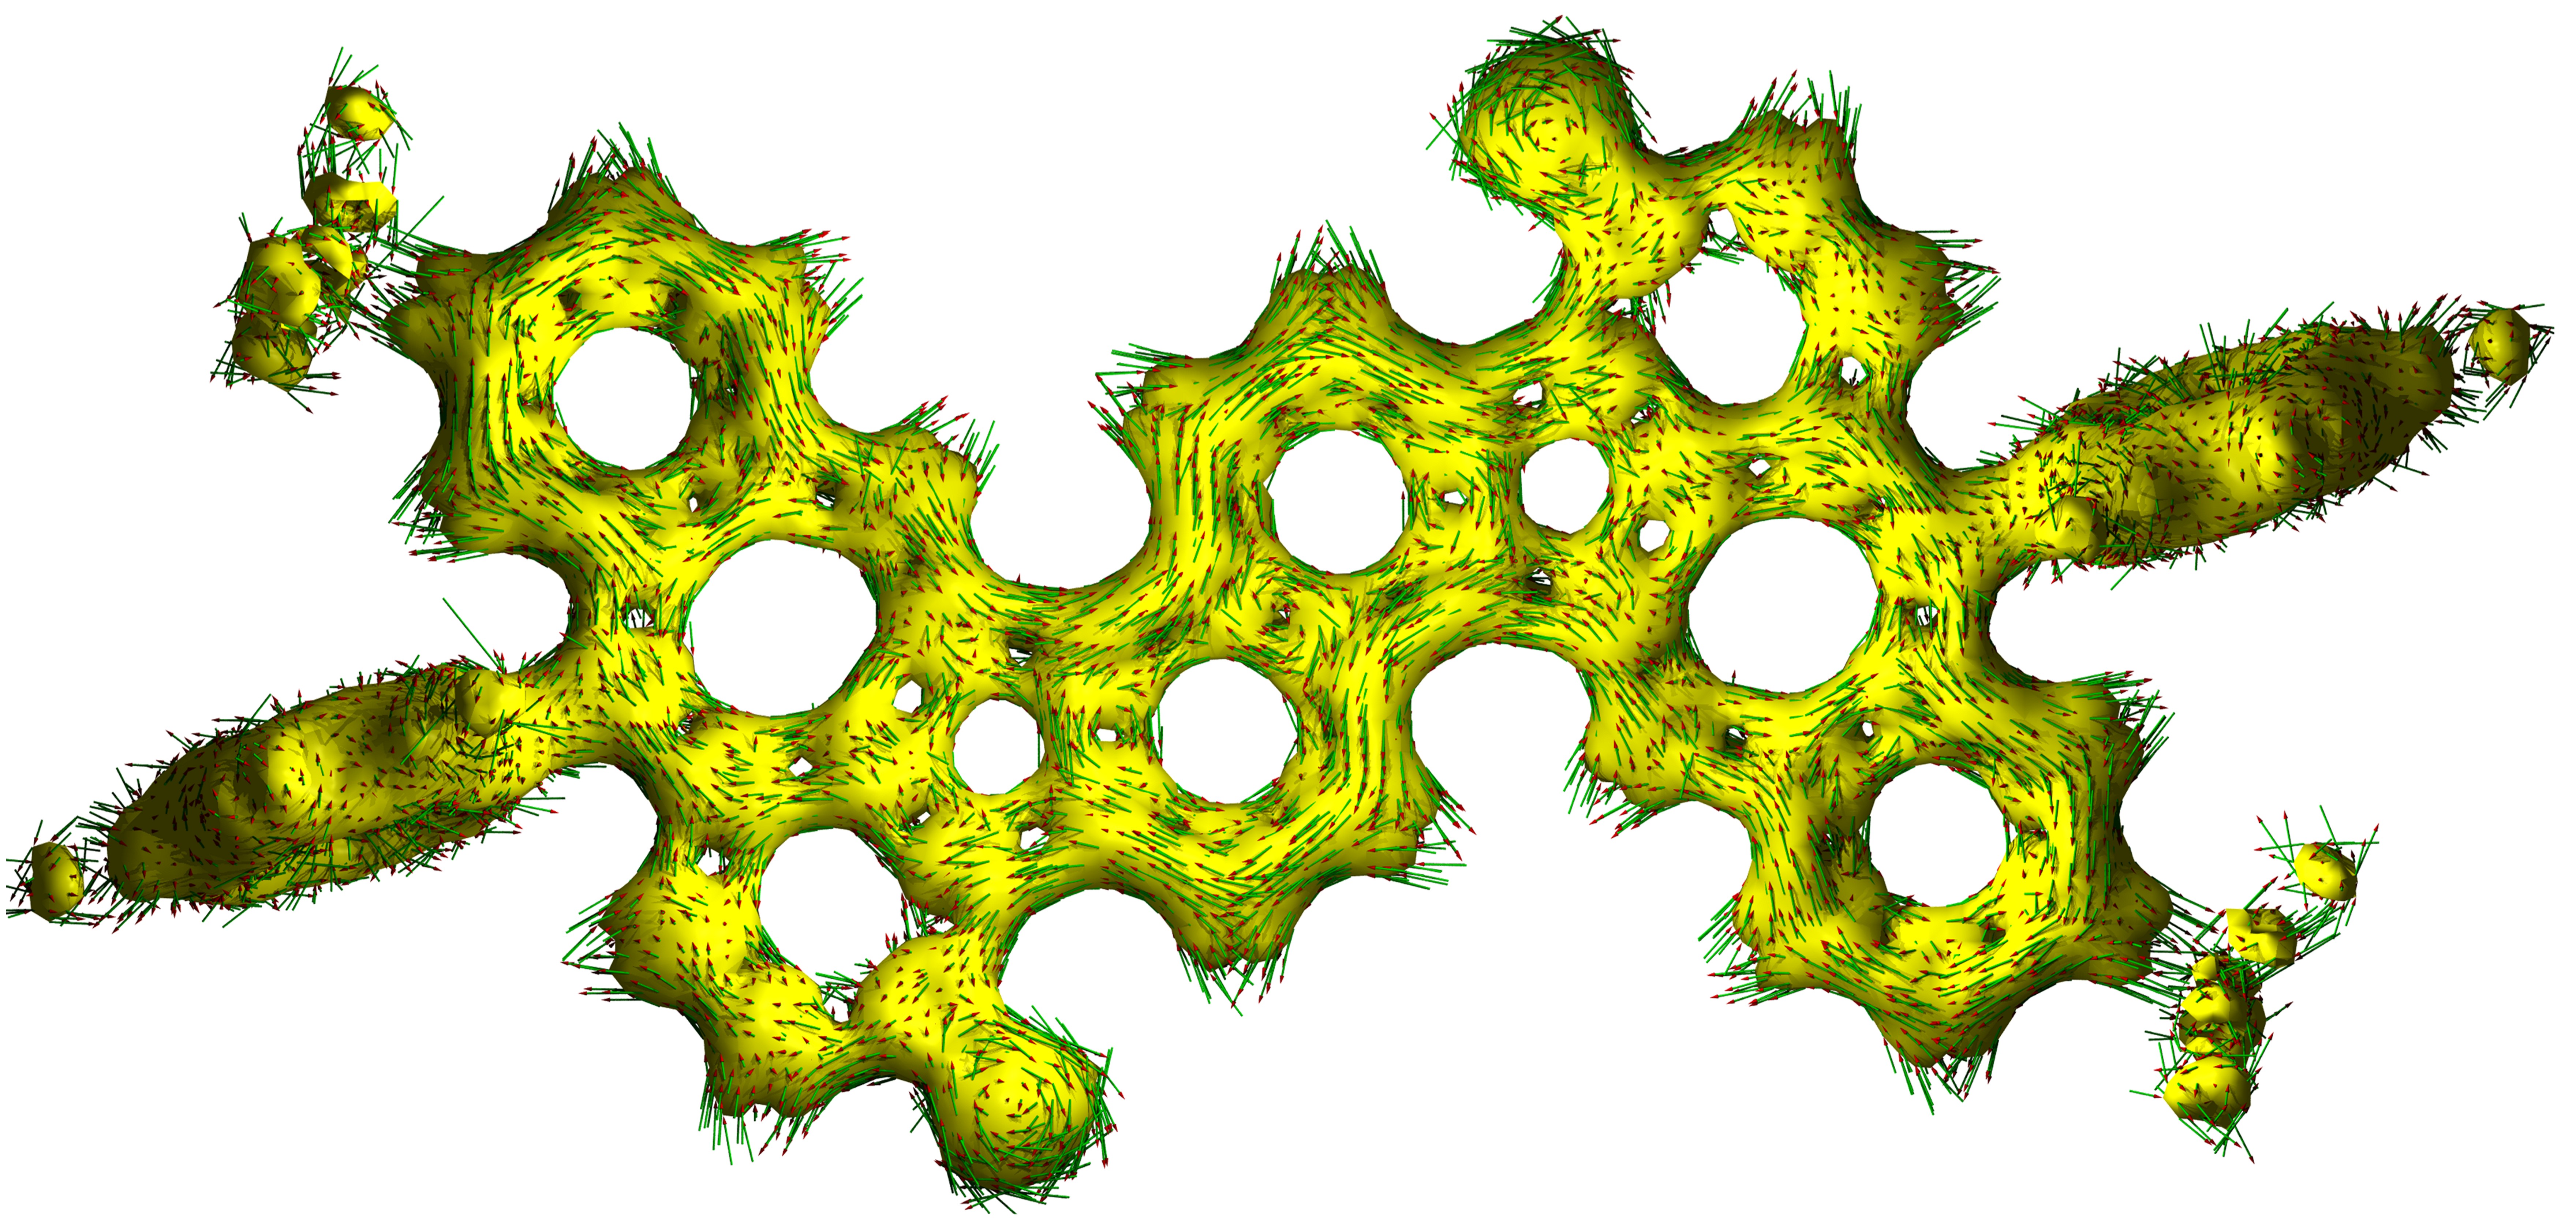


**Figure S15** The calculated ACID plots of compound **3** (closed-shell state)


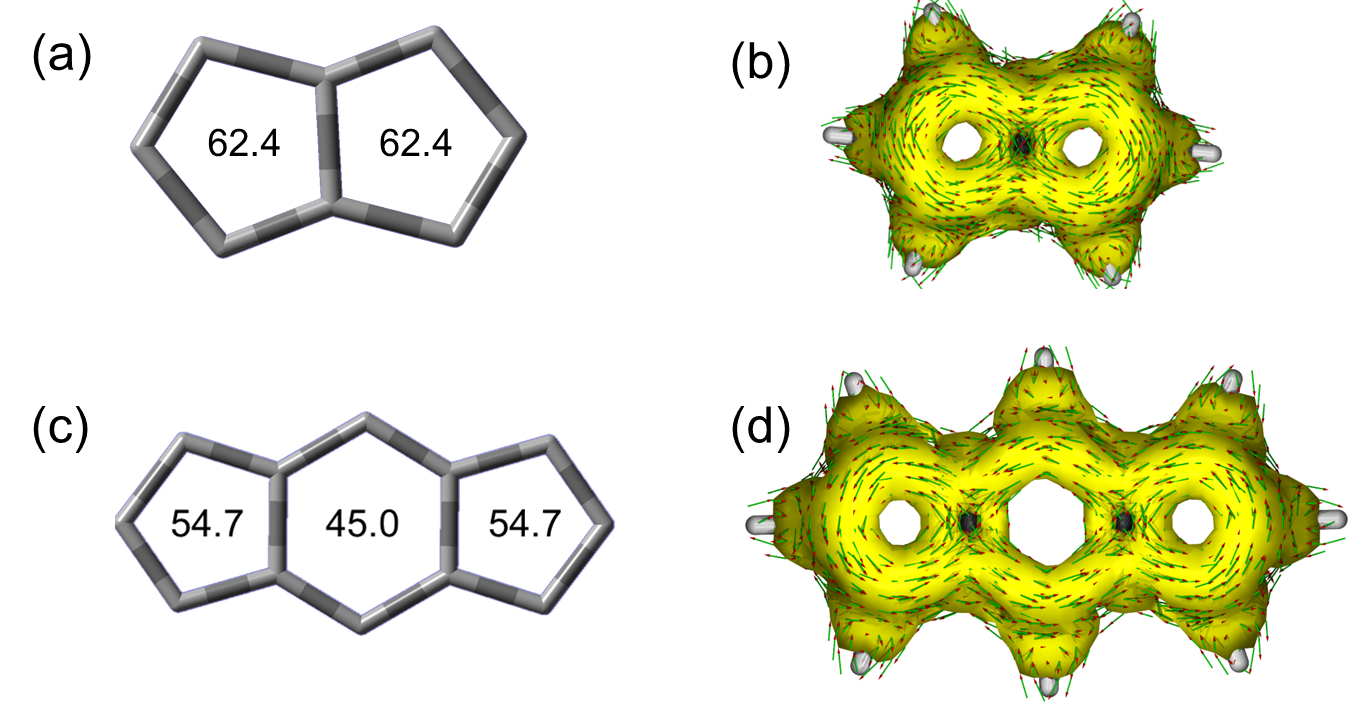


**Figure 16** The calculated NICS (a, c) and ACID plots (b, d) of pristine pentalene (a, b) and s-indacene (c, d) units.


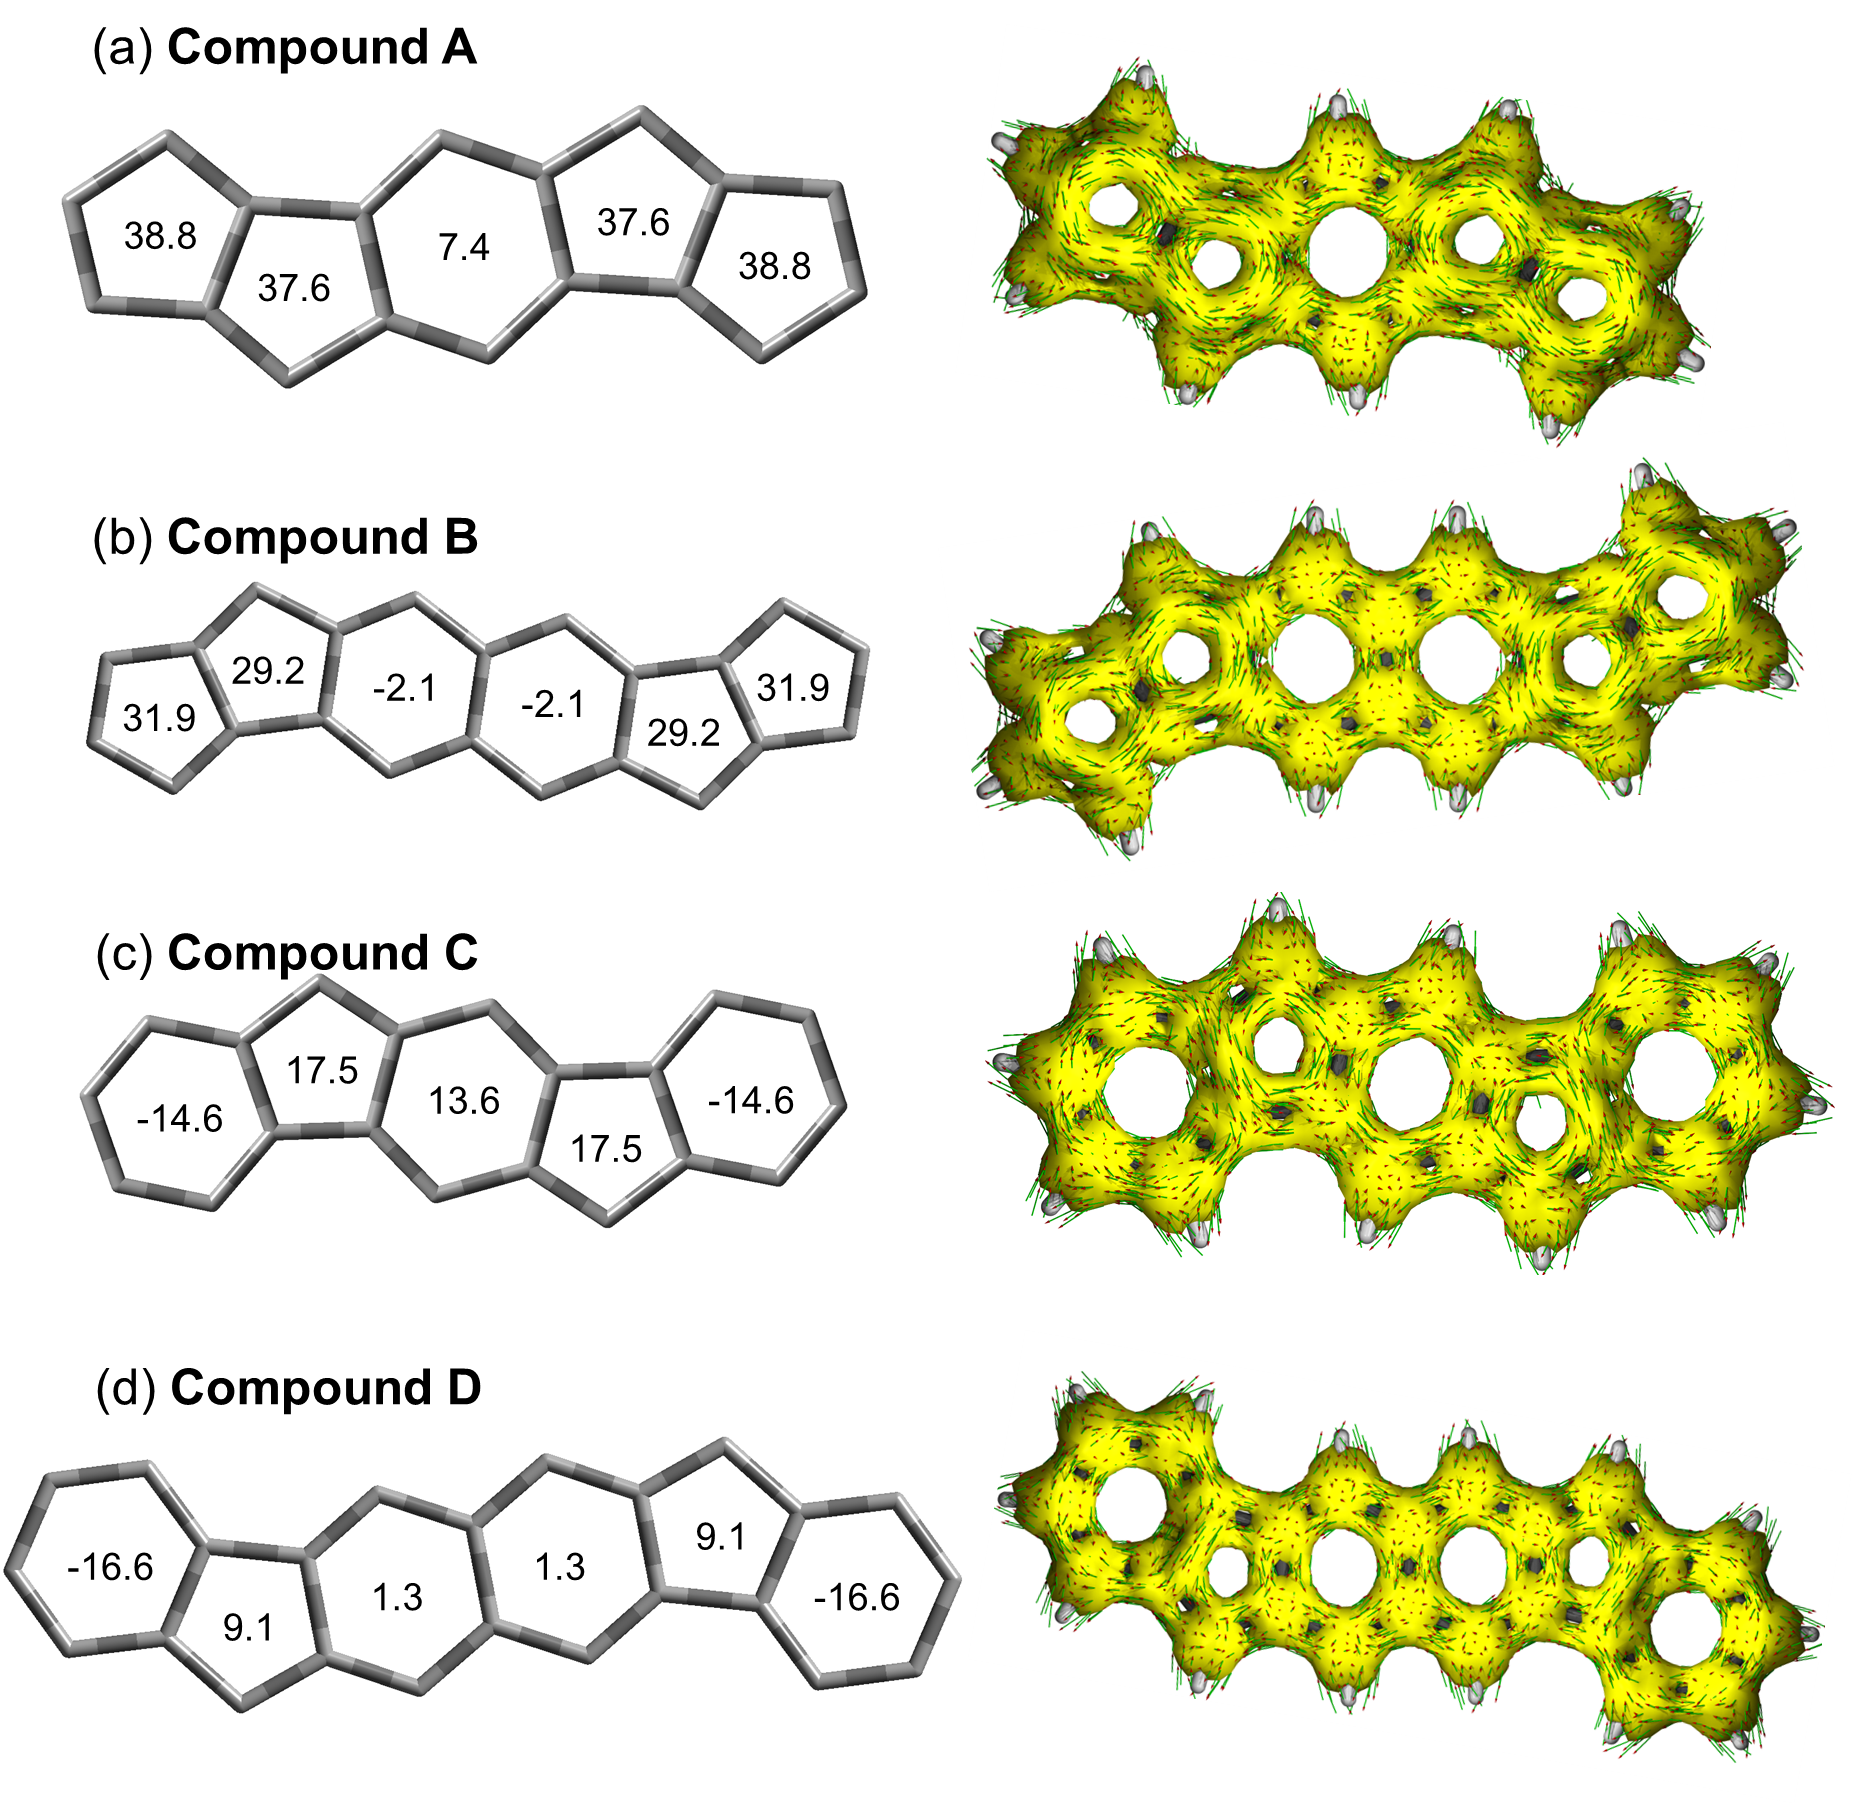


**Figure S17** The model compounds of (a) bis(pentalene)-fused benzene or (b) naphthalene derivatives.


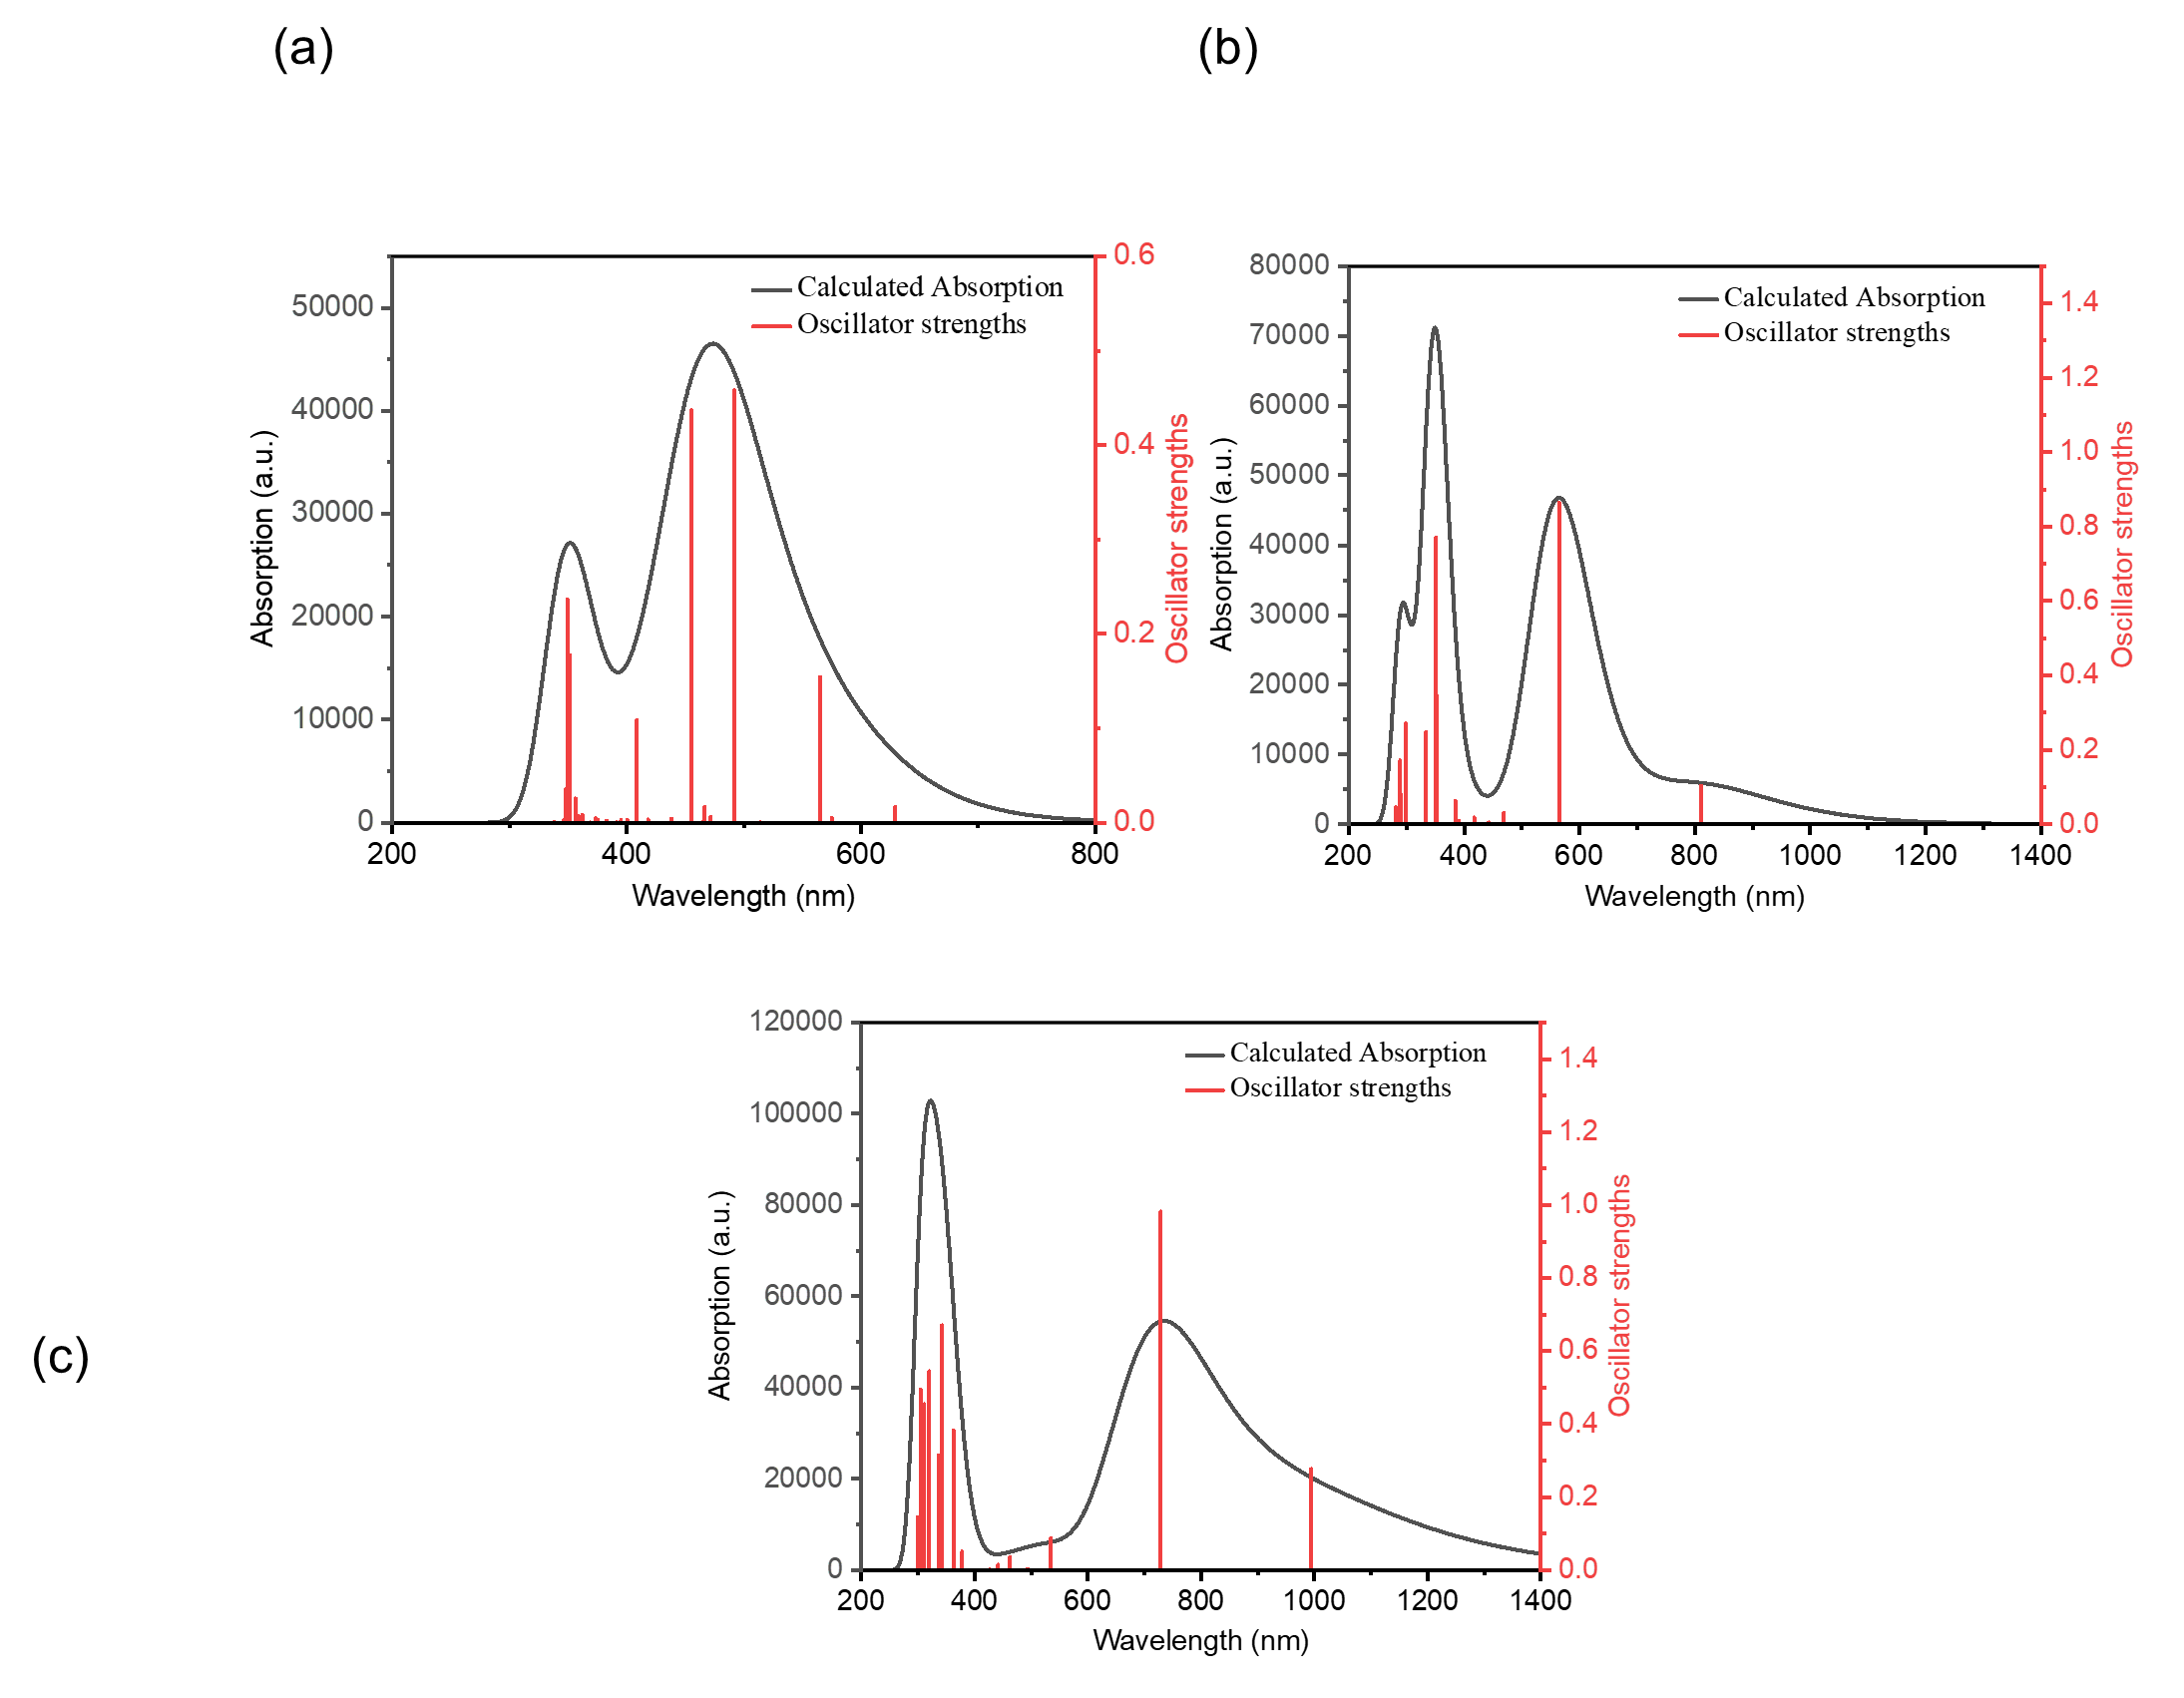


**Figure S18** Calculated UV-vis absorption spectra of the **1** (closed-shell single state)

**Table S7** Excitation energies, oscillator strengths and orbital contribution of the S0 → Sn excitations of **1** calculated at the TD-B3LYP-D3(BJ)/6-31G(d,p) level of theory.

| transition | energy [eV] | energy [nm] | oscillator  strength | orbital contribution | |
| --- | --- | --- | --- | --- | --- |
| S0 → S1 | 1.4772 | 839.32 | 0.00010 | H-1 → L | 95.9% |
| S0 → S2 | 1.5298 | 810.46 | 0.10370 | H → L  H-3 → L | 74.2%  25.3% |
| S0 → S3 | 1.6801 | 737.96 | 0.00000 | H-2 → L | 96.0% |
| S0 → S4 | 2.1946 | 564.95 | 0.86380 | H-3 → L  H → L | 70.8%  23.4% |
| S0 → S5 | 2.6274 | 471.89 | 0.00010 | H-4 → L | 97.9% |
| S0 → S6 | 2.6429 | 469.12 | 0.03100 | H-5 → L | 96.1% |
| S0 → S7 | 2.8008 | 442.67 | 0.00510 | H-6 → L | 98.0% |
| S0 → S8 | 2.8057 | 441.90 | 0.00150 | H-7 → L | 98.4% |
| S0 → S9 | 2.9678 | 417.76 | 0.01880 | H-8 → L | 92.5% |
| S0 → S10 | 2.9818 | 415.80 | 0.00260 | H-9 → L  H → L+1 | 87.6% 7.1% |


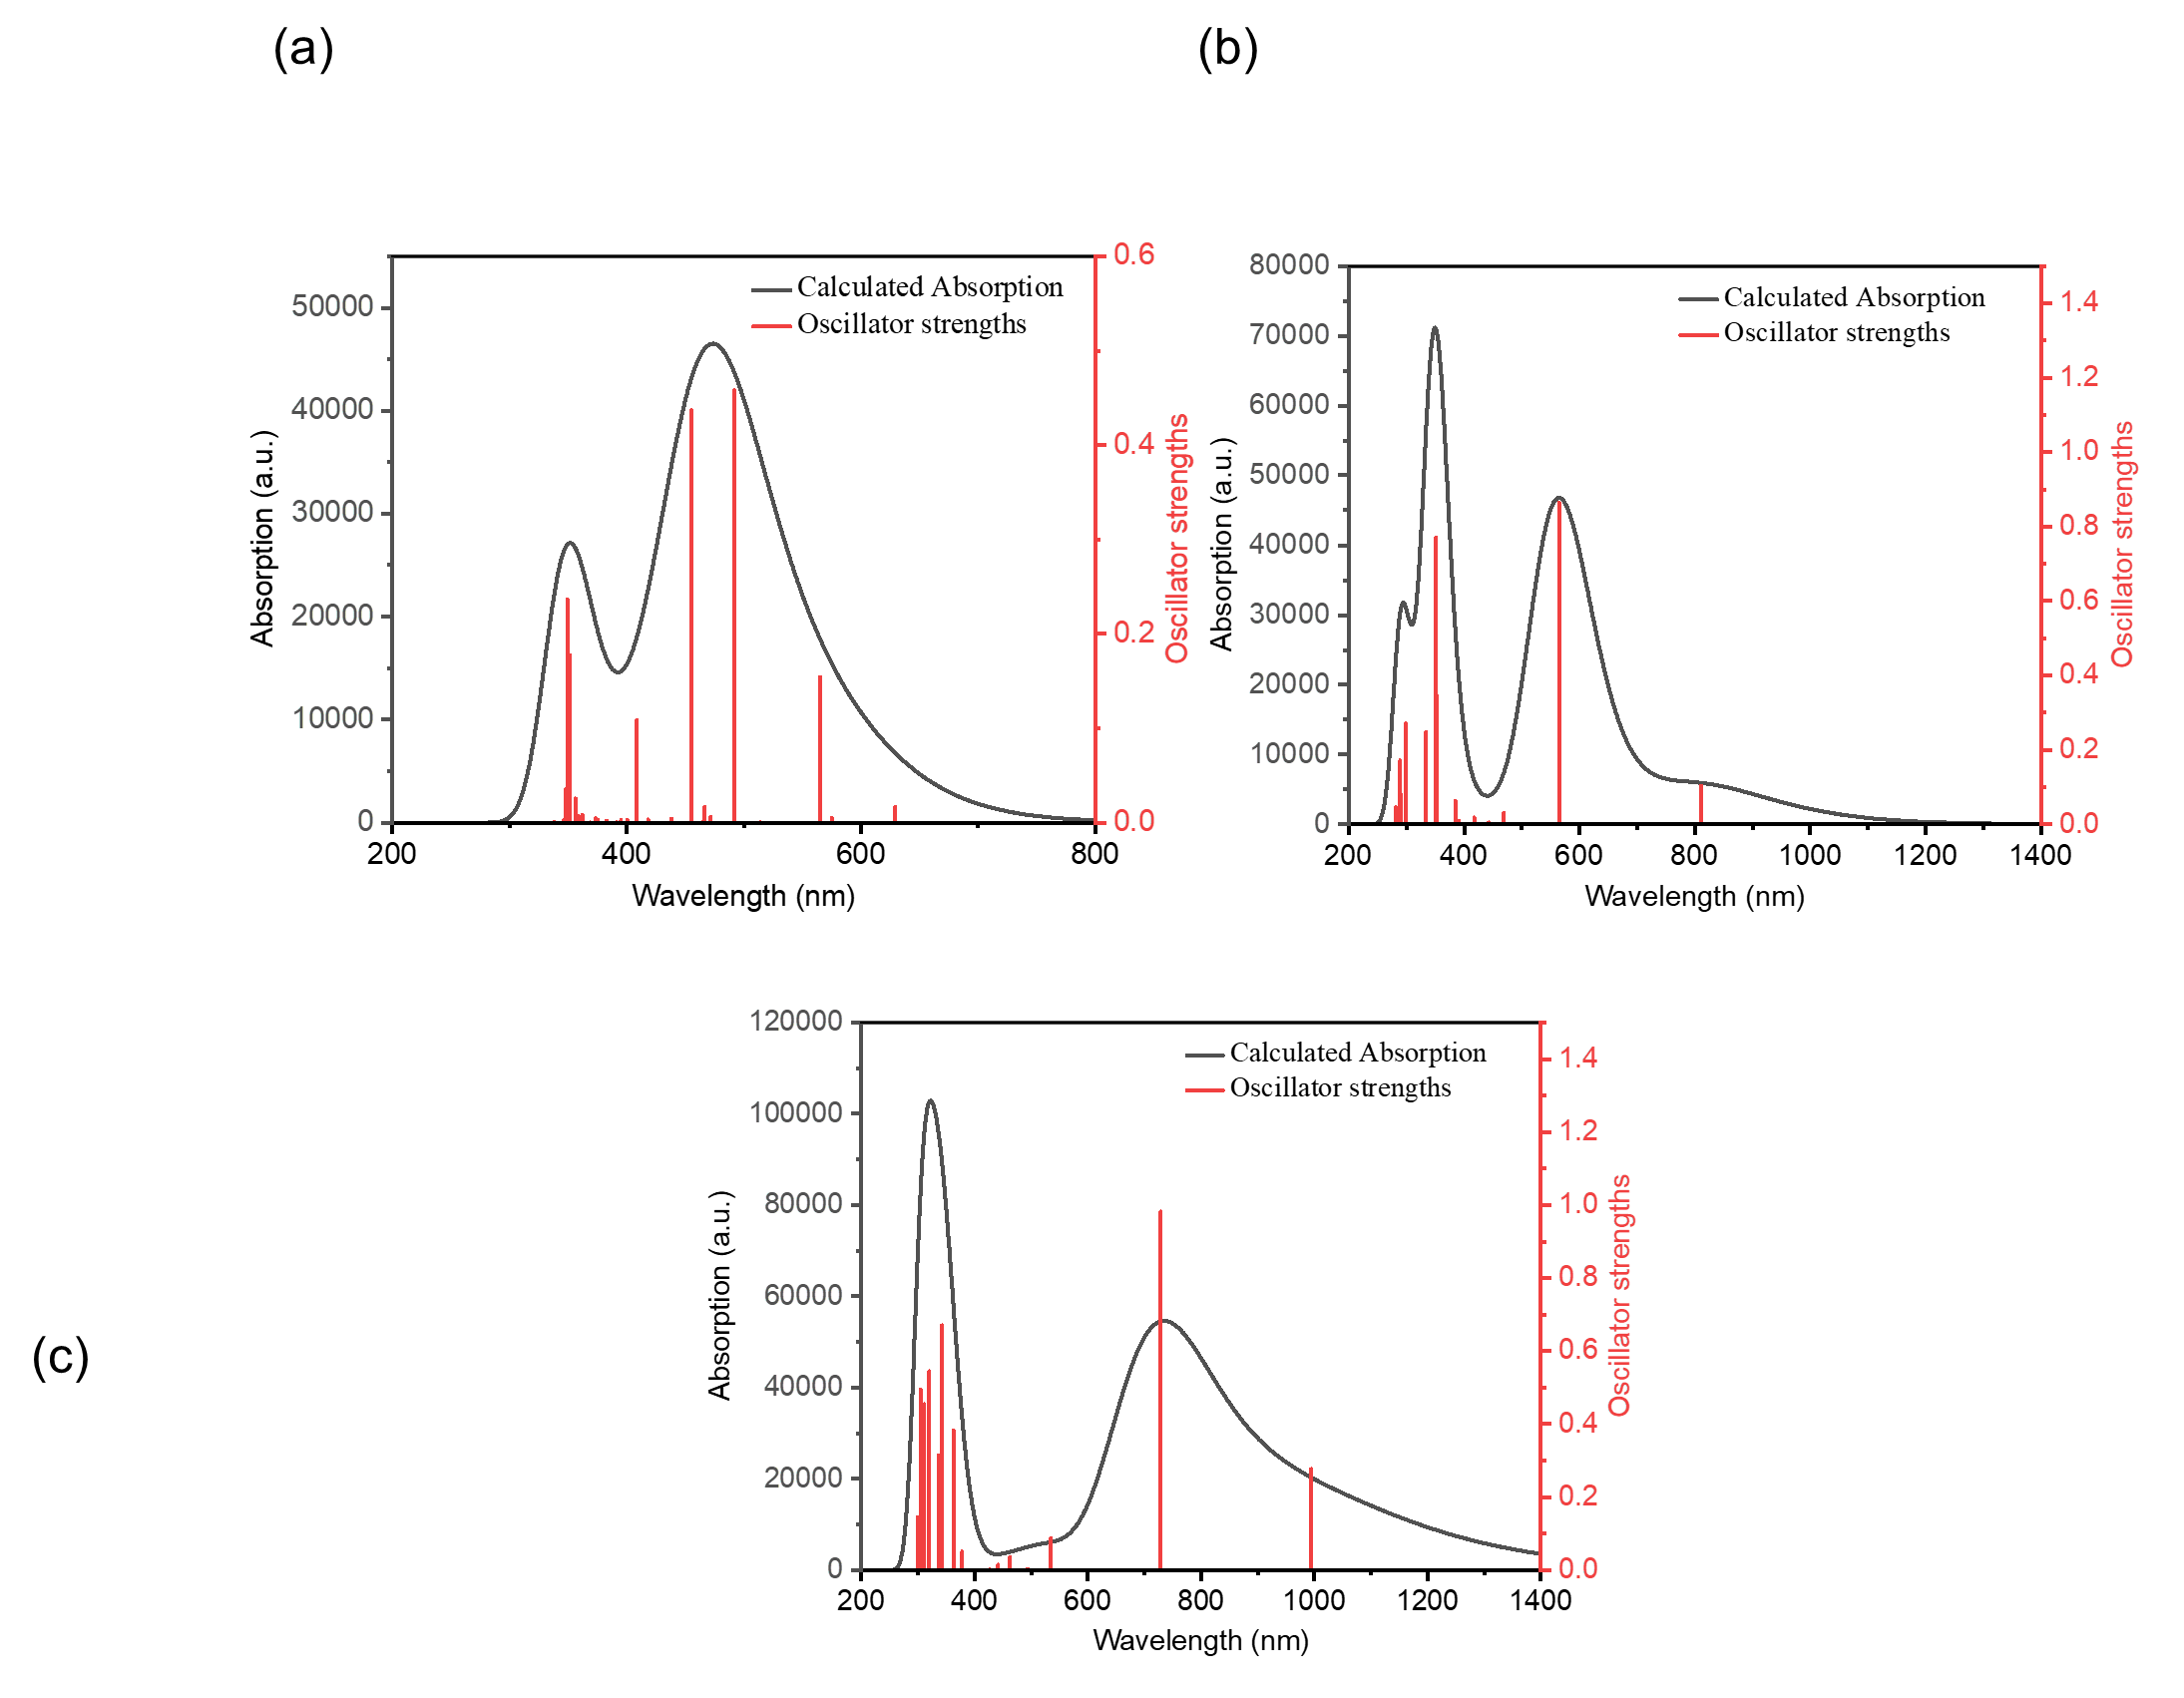


**Figure S19** Calculated UV-vis absorption spectra of the **2** (open-shell single state)


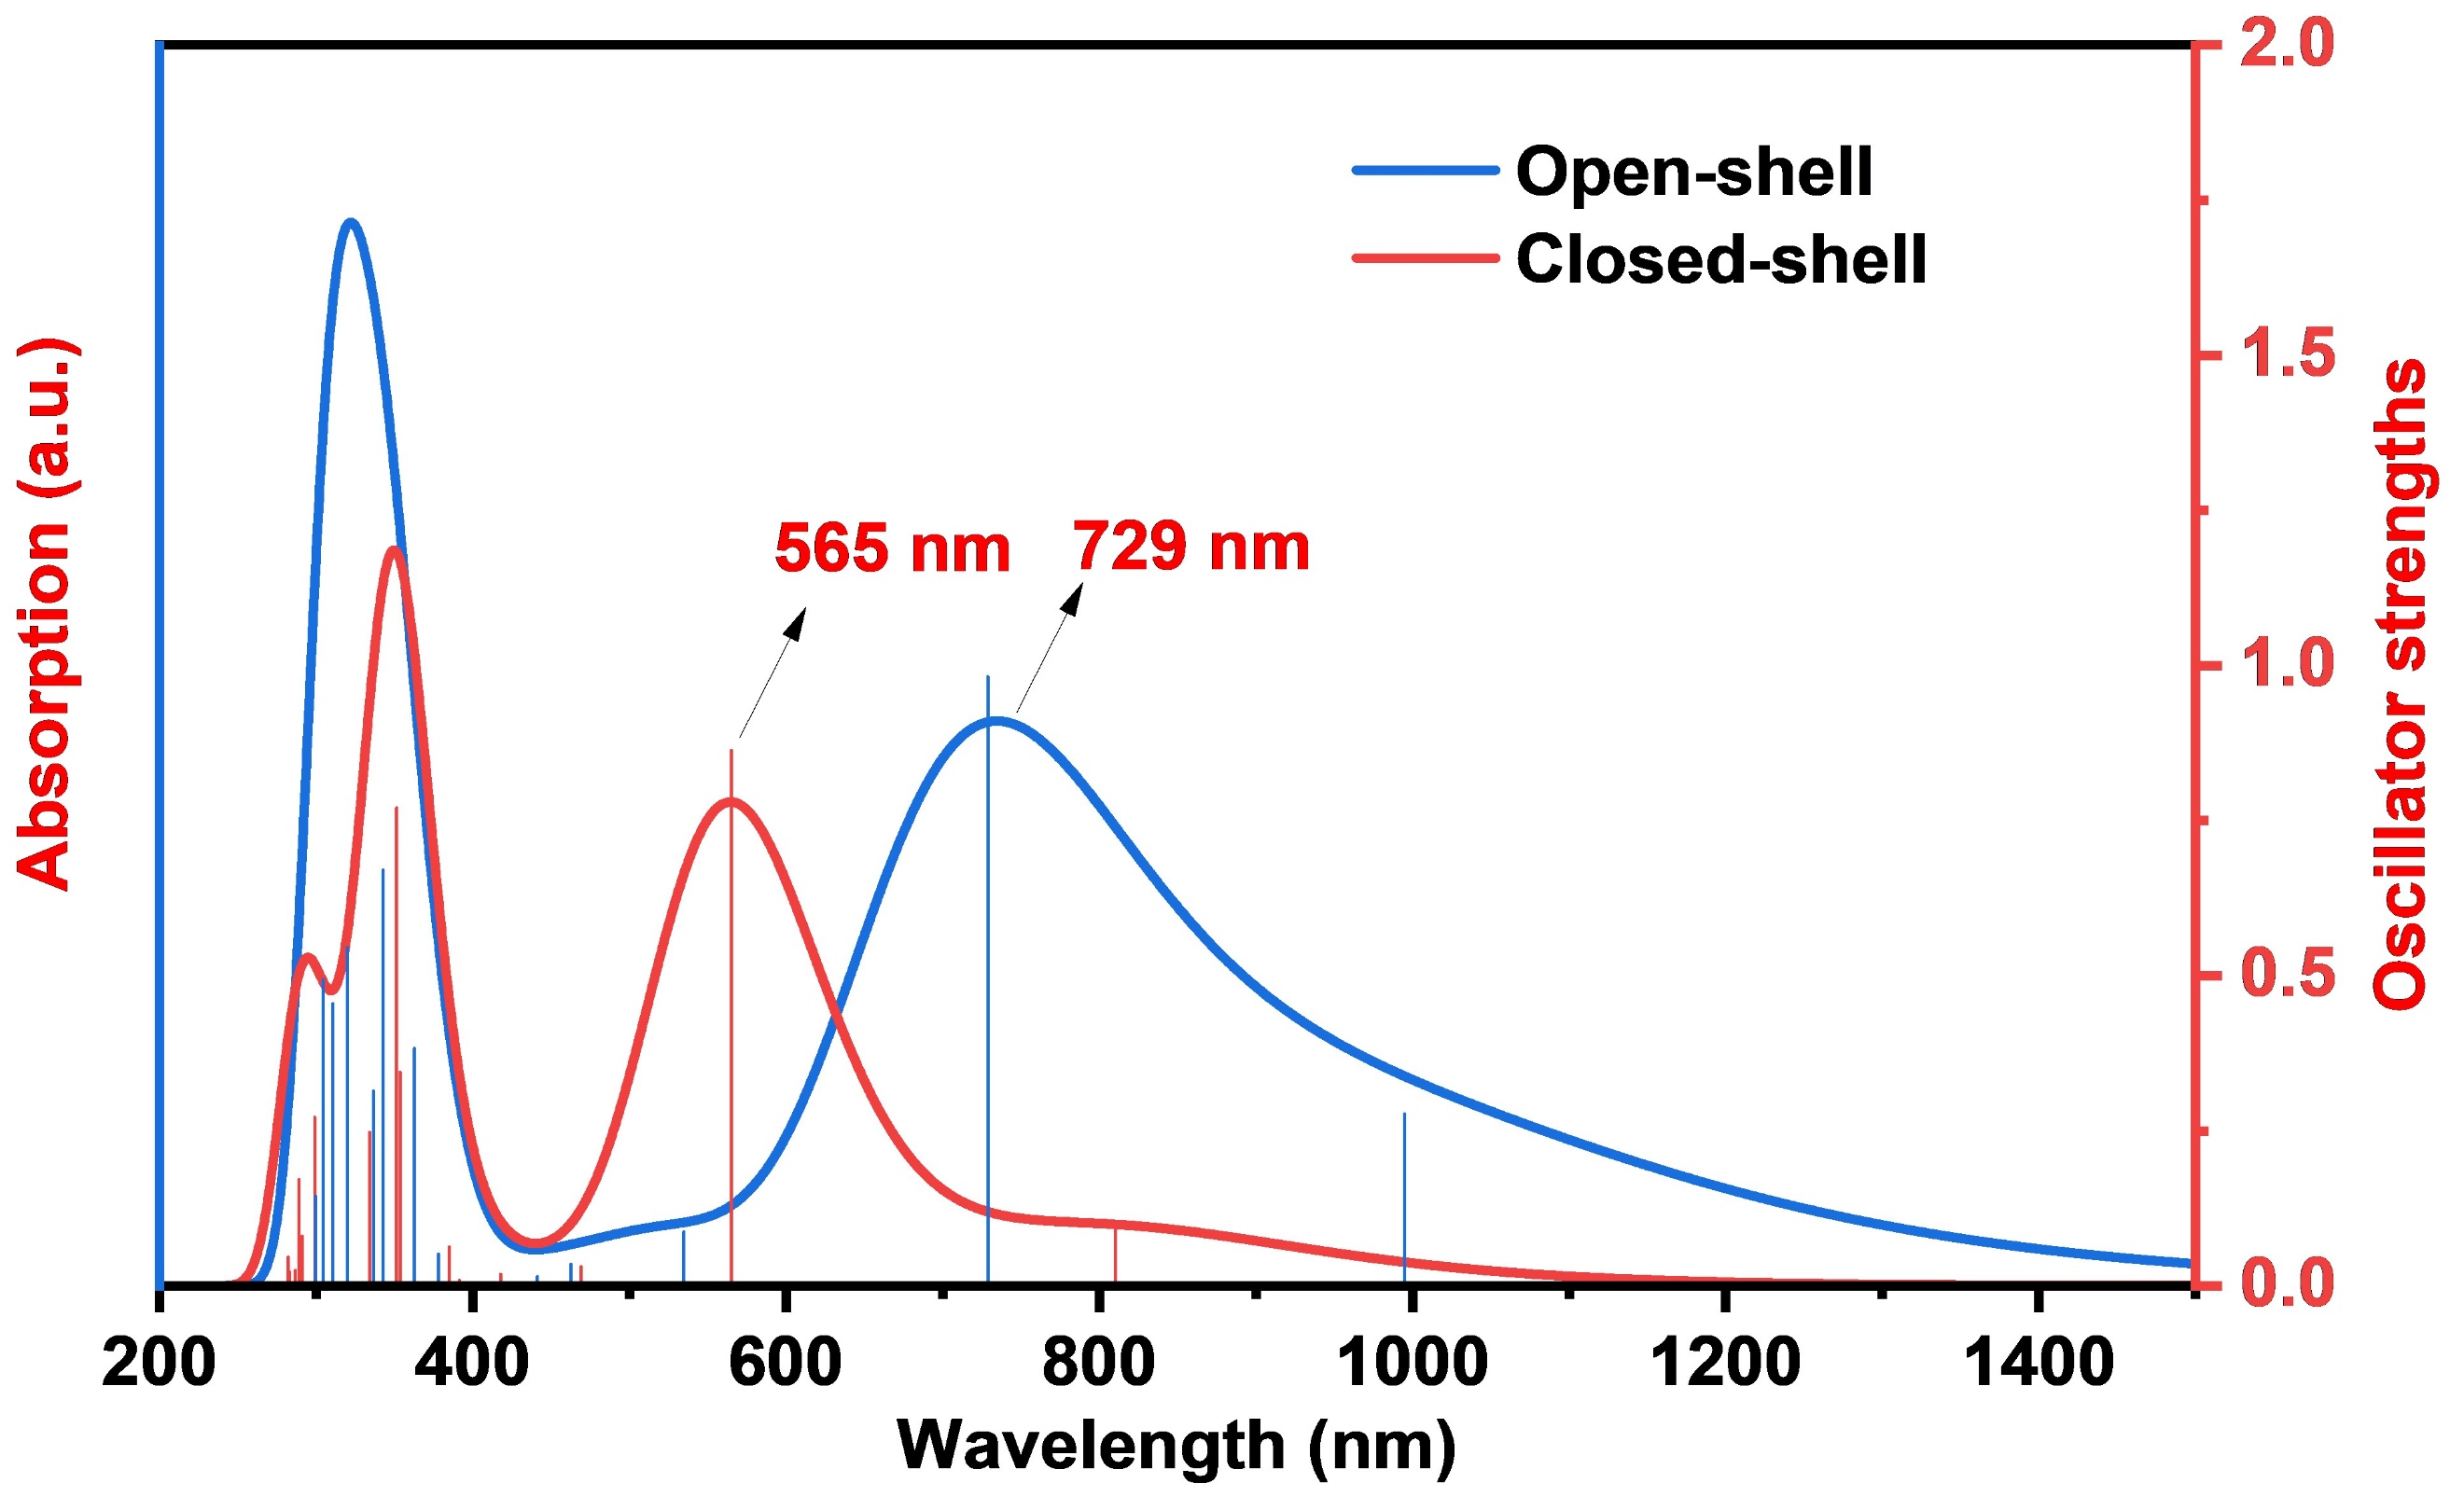


**Figure S20** Calculated UV-vis absorption spectra of the compound **2** in open-shell (blue line) and closed-shell states (red line).

**Table S8** Excitation energies, oscillator strengths and orbital contribution of the S0 → Sn excitations of **2** calculated at the TD-UB3LYP-D3(BJ)/6-31G(d,p) level of theory.

| transition | energy [eV] | energy [nm] | oscillator  strength | orbital contribution | |
| --- | --- | --- | --- | --- | --- |
| S0 → S1 | 1.2465 | 994.66 | 0.27740 | H → L  H-2 → L | 56.2%  45.8% |
| S0 → S2 | 1.2868 | 963.51 | 0.00000 | H-1 → L | 99.0% |
| S0 → S3 | 1.4414 | 860.17 | 0.00000 | H-3 → L | 98.9% |
| S0 → S4 | 1.7014 | 728.72 | 0.98210 | H-2 → L  H → L | 53.0%  48.1 |
| S0 → S5 | 2.3186 | 534.74 | 0.08730 | H-4 → L | 98.5% |
| S0 → S6 | 2.3408 | 529.67 | 0.00010 | H-5 → L | 96.8% |
| S0 → S7 | 2.5099 | 493.98 | 0.00320 | H-6 → L | 99.4% |
| S0 → S8 | 2.5159 | 492.80 | 0.00110 | H-7 → L | 99.3% |
| S0 → S9 | 2.6810 | 462.46 | 0.03480 | H-8 → L | 95.6% |
| S0 → S10 | 2.6902 | 460.87 | 0.00010 | H-9 → L  H → L+1 | 73.9%  22.5% |


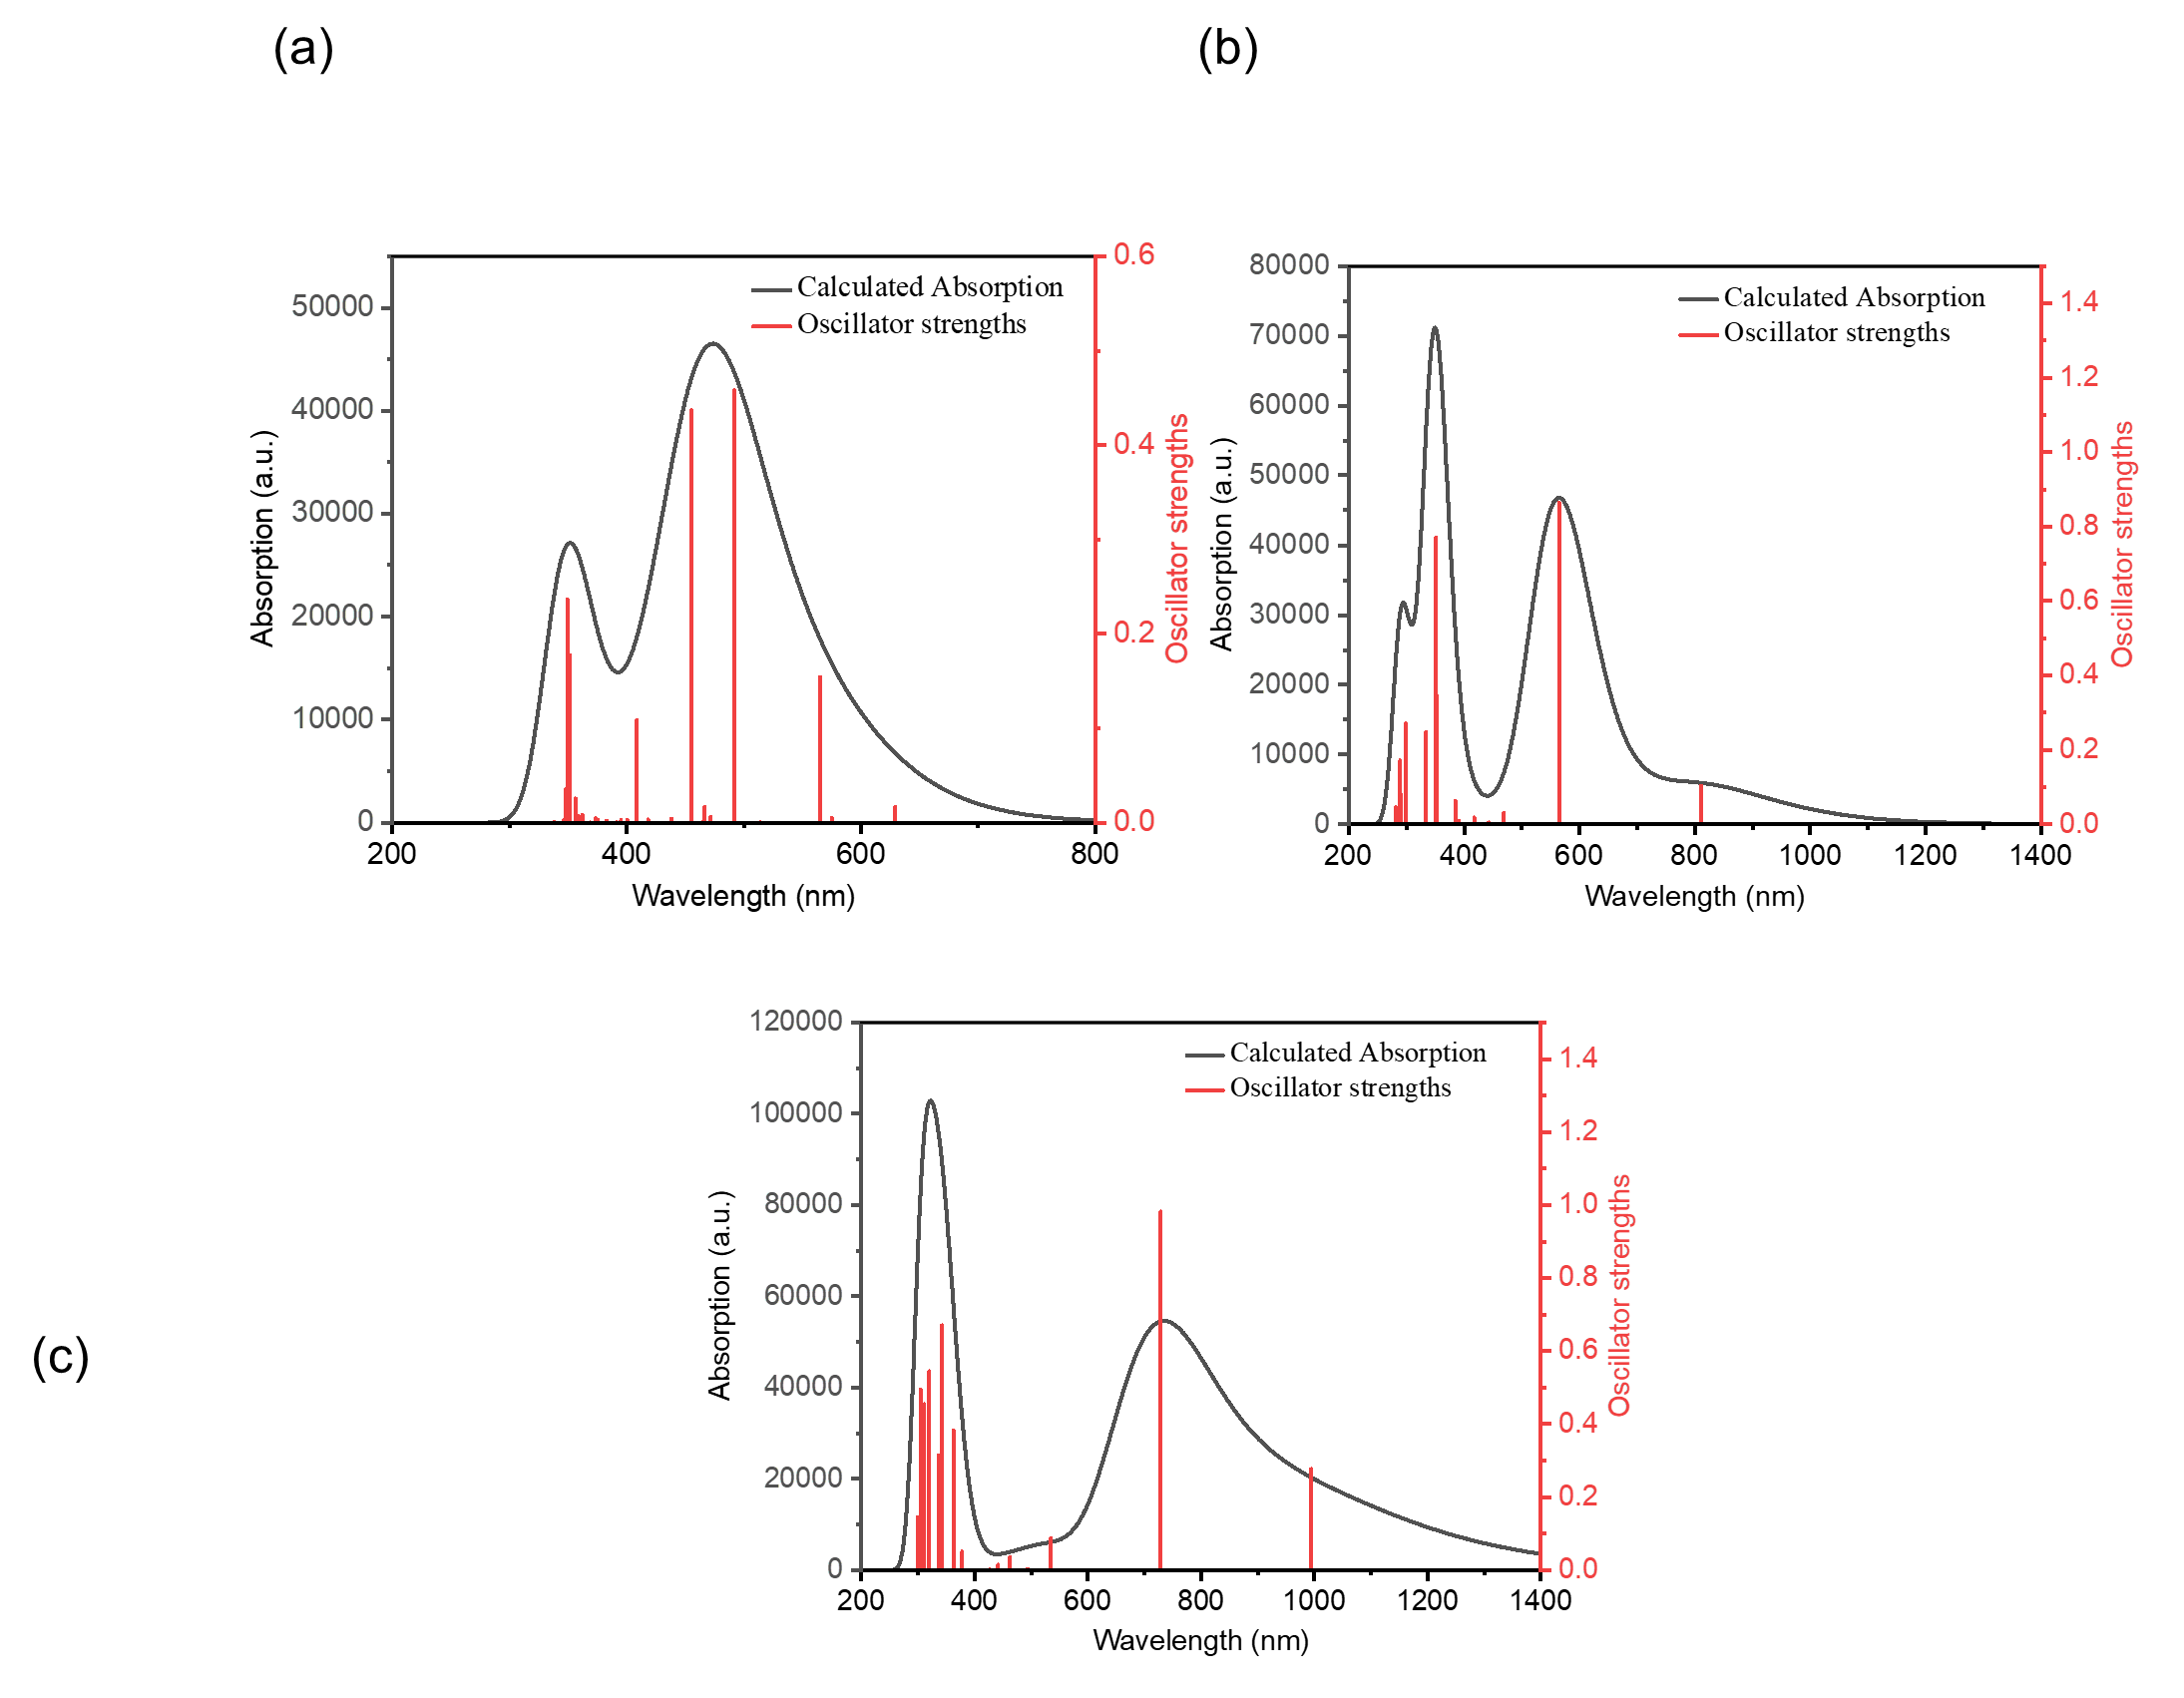


**Figure S21** Calculated UV-vis absorption spectra of the **3** (closed-shell single state)

**Table S9** Excitation energies, oscillator strengths and orbital contribution of the S0 → Sn excitations of **3** calculated at the TD-B3LYP-D3(BJ)/6-31G(d,p) level of theory.

| transition | energy [eV] | energy [nm] | oscillator  strength | orbital contribution | |
| --- | --- | --- | --- | --- | --- |
| S0 → S1 | 1.9697 | 629.46 | 0.01680 | H → L  H→ L+2 | 71.4%  20.9% |
| S0 → S2 | 2.1561 | 575.04 | 0.00480 | H → L+1  H → L+3 | 79.6%  8.5% |
| S0 → S3 | 2.1946 | 564.95 | 0.15430 | H → L+2  H → L | 68.8%  20.8% |
| S0 → S4 | 2.4113 | 514.18 | 0.00010 | H → L+3  H → L+1 | 80.8%  8.9% |
| S0 → S5 | 2.5209 | 491.83 | 0.45790 | H-1 → L | 94.6% |
| S0 → S6 | 2.6278 | 471.82 | 0.00630 | H-1 → L+1 | 79.0% |
| S0 → S7 | 2.6573 | 466.58 | 0.01670 | H-3 → L  H-4 →L+1  H-3 → L+2  H-3 → L+1 | 47.0%  22.9%  10.3%  6.9% |
| S0 → S8 | 2.6674 | 464.81 | 0.00030 | H-4 → L  H-3 → L+1  H-4 → L+1  H-1 → L+1 | 33.5%  26.2%  22.7%  9.2% |
| S0 → S9 | 2.7240 | 455.15 | 0.43700 | H-1 → L+2  H-2 → L+1 | 84.1%  5.1% |
| S0 → S10 | 2.8298 | 438.14 | 0.00400 | H-2 → L  H-2 → L+2 | 75.4%  10.6% |

**Table S10** Summary of the absorption and electrochemistry parameters


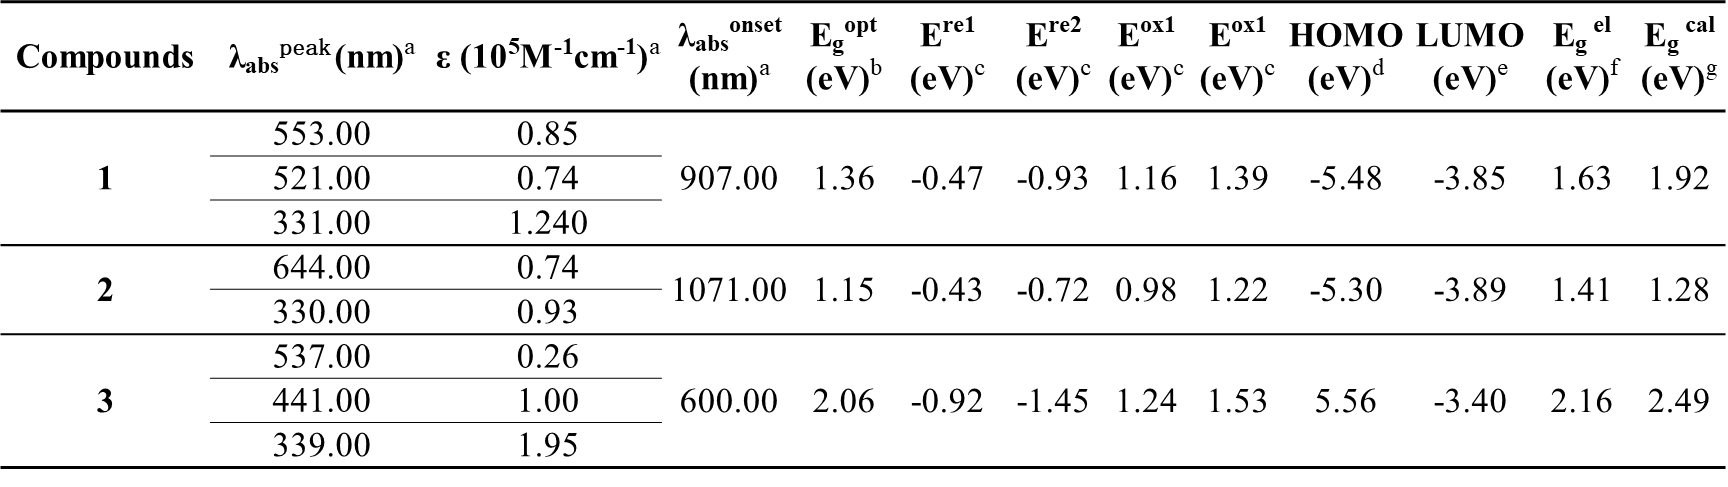


a. Absorption maxima, molar extinction coefficient and onset absorption in 10-5 mol/L dichloromethane solution.

b. Based on the onset absorption (*E*gopt = 1240/*λ*absonset).

c. Oxidative and reductive potential based on cyclic voltammograms (CV) with ferrocene as an external standard.

d. Calculated the HOMO and LUMO energy levels based on the reference of Fc/Fc+.

f. Estimated using the equation: *E*gel = LUMO-HOMO.

g. DFT calculation at (U)B3LYP-D3(BJ)/6-31G(d, p) level.

**7. The stabilities of 1, 2 and 3**


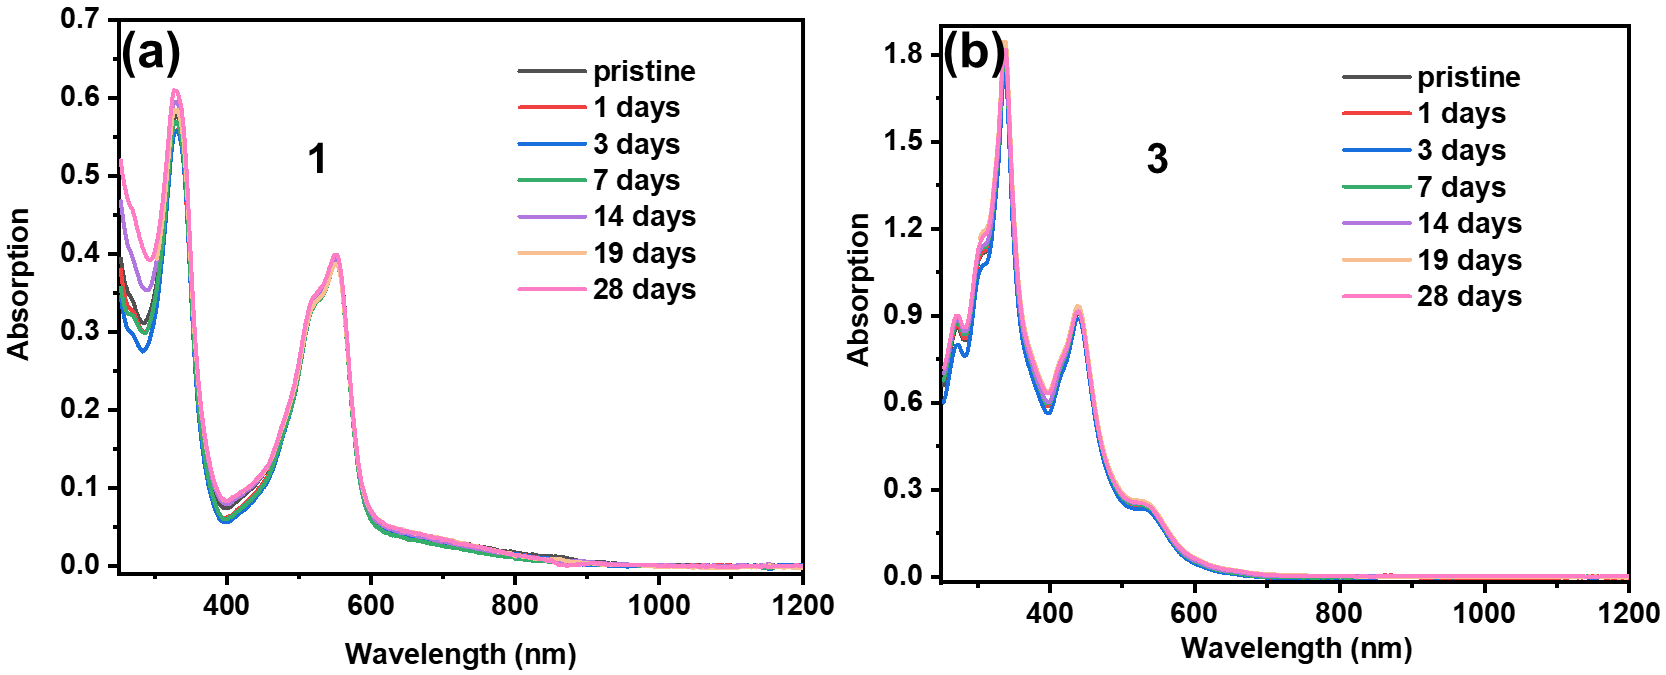


**Figure S22** Time-dependent UV-vis measurements were performed under ambient conditions for compound **(a)** **1 and (b) 3.** Single-crystal samples of **1** and **3** were dissolved in HPLC-grade CH2Cl2 open to the atmosphere. The cuvette was sealed with a Teflon cap and kept on the bench top.


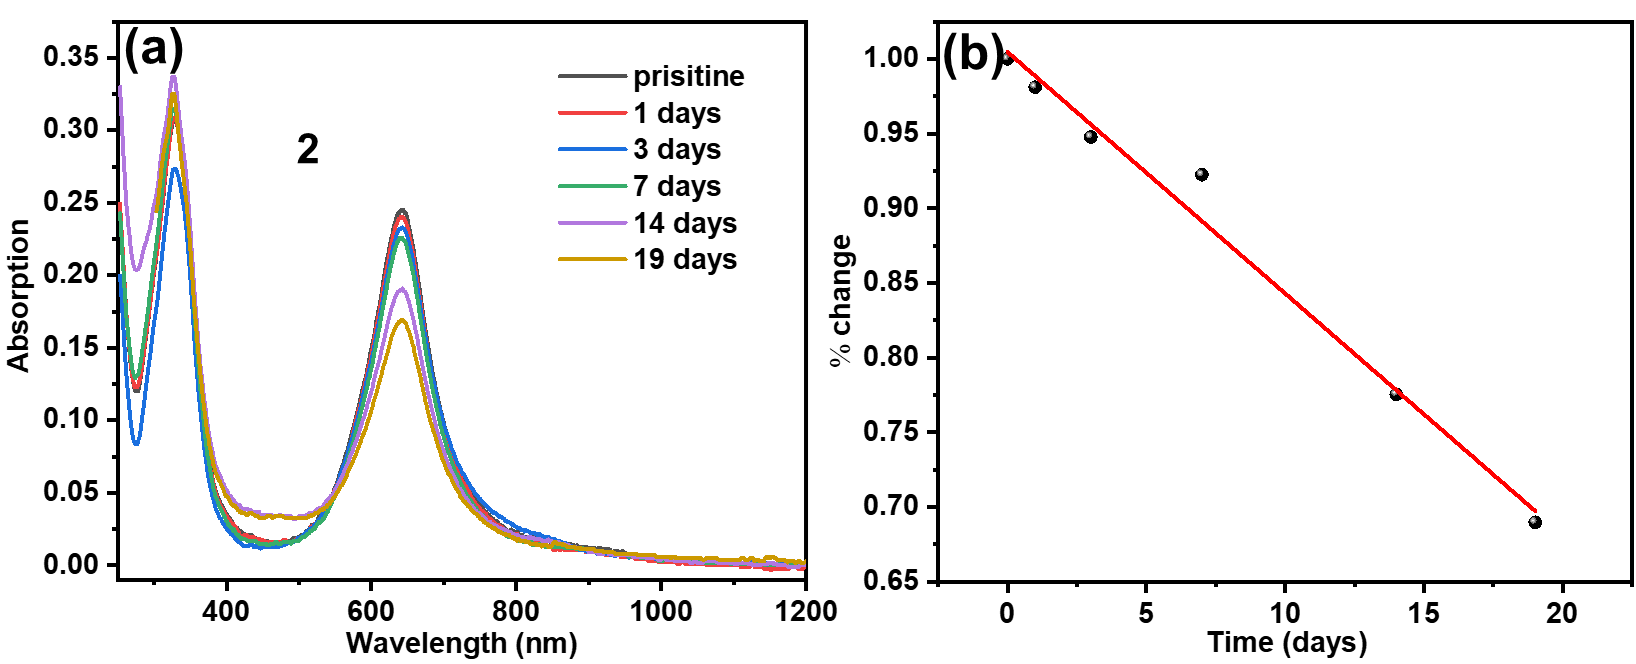


**Figure S23** (a) Time-dependent UV−vis measurements were performed under ambient conditions for compound **2. (b)** Time-dependent UV-vis absorbance of **2** in CH2Cl2 solution. Linear regression and extrapolation to % change = 0.50 gives a half-life of ca. 32 days.

8. The variable-temperature 1H NMR

**
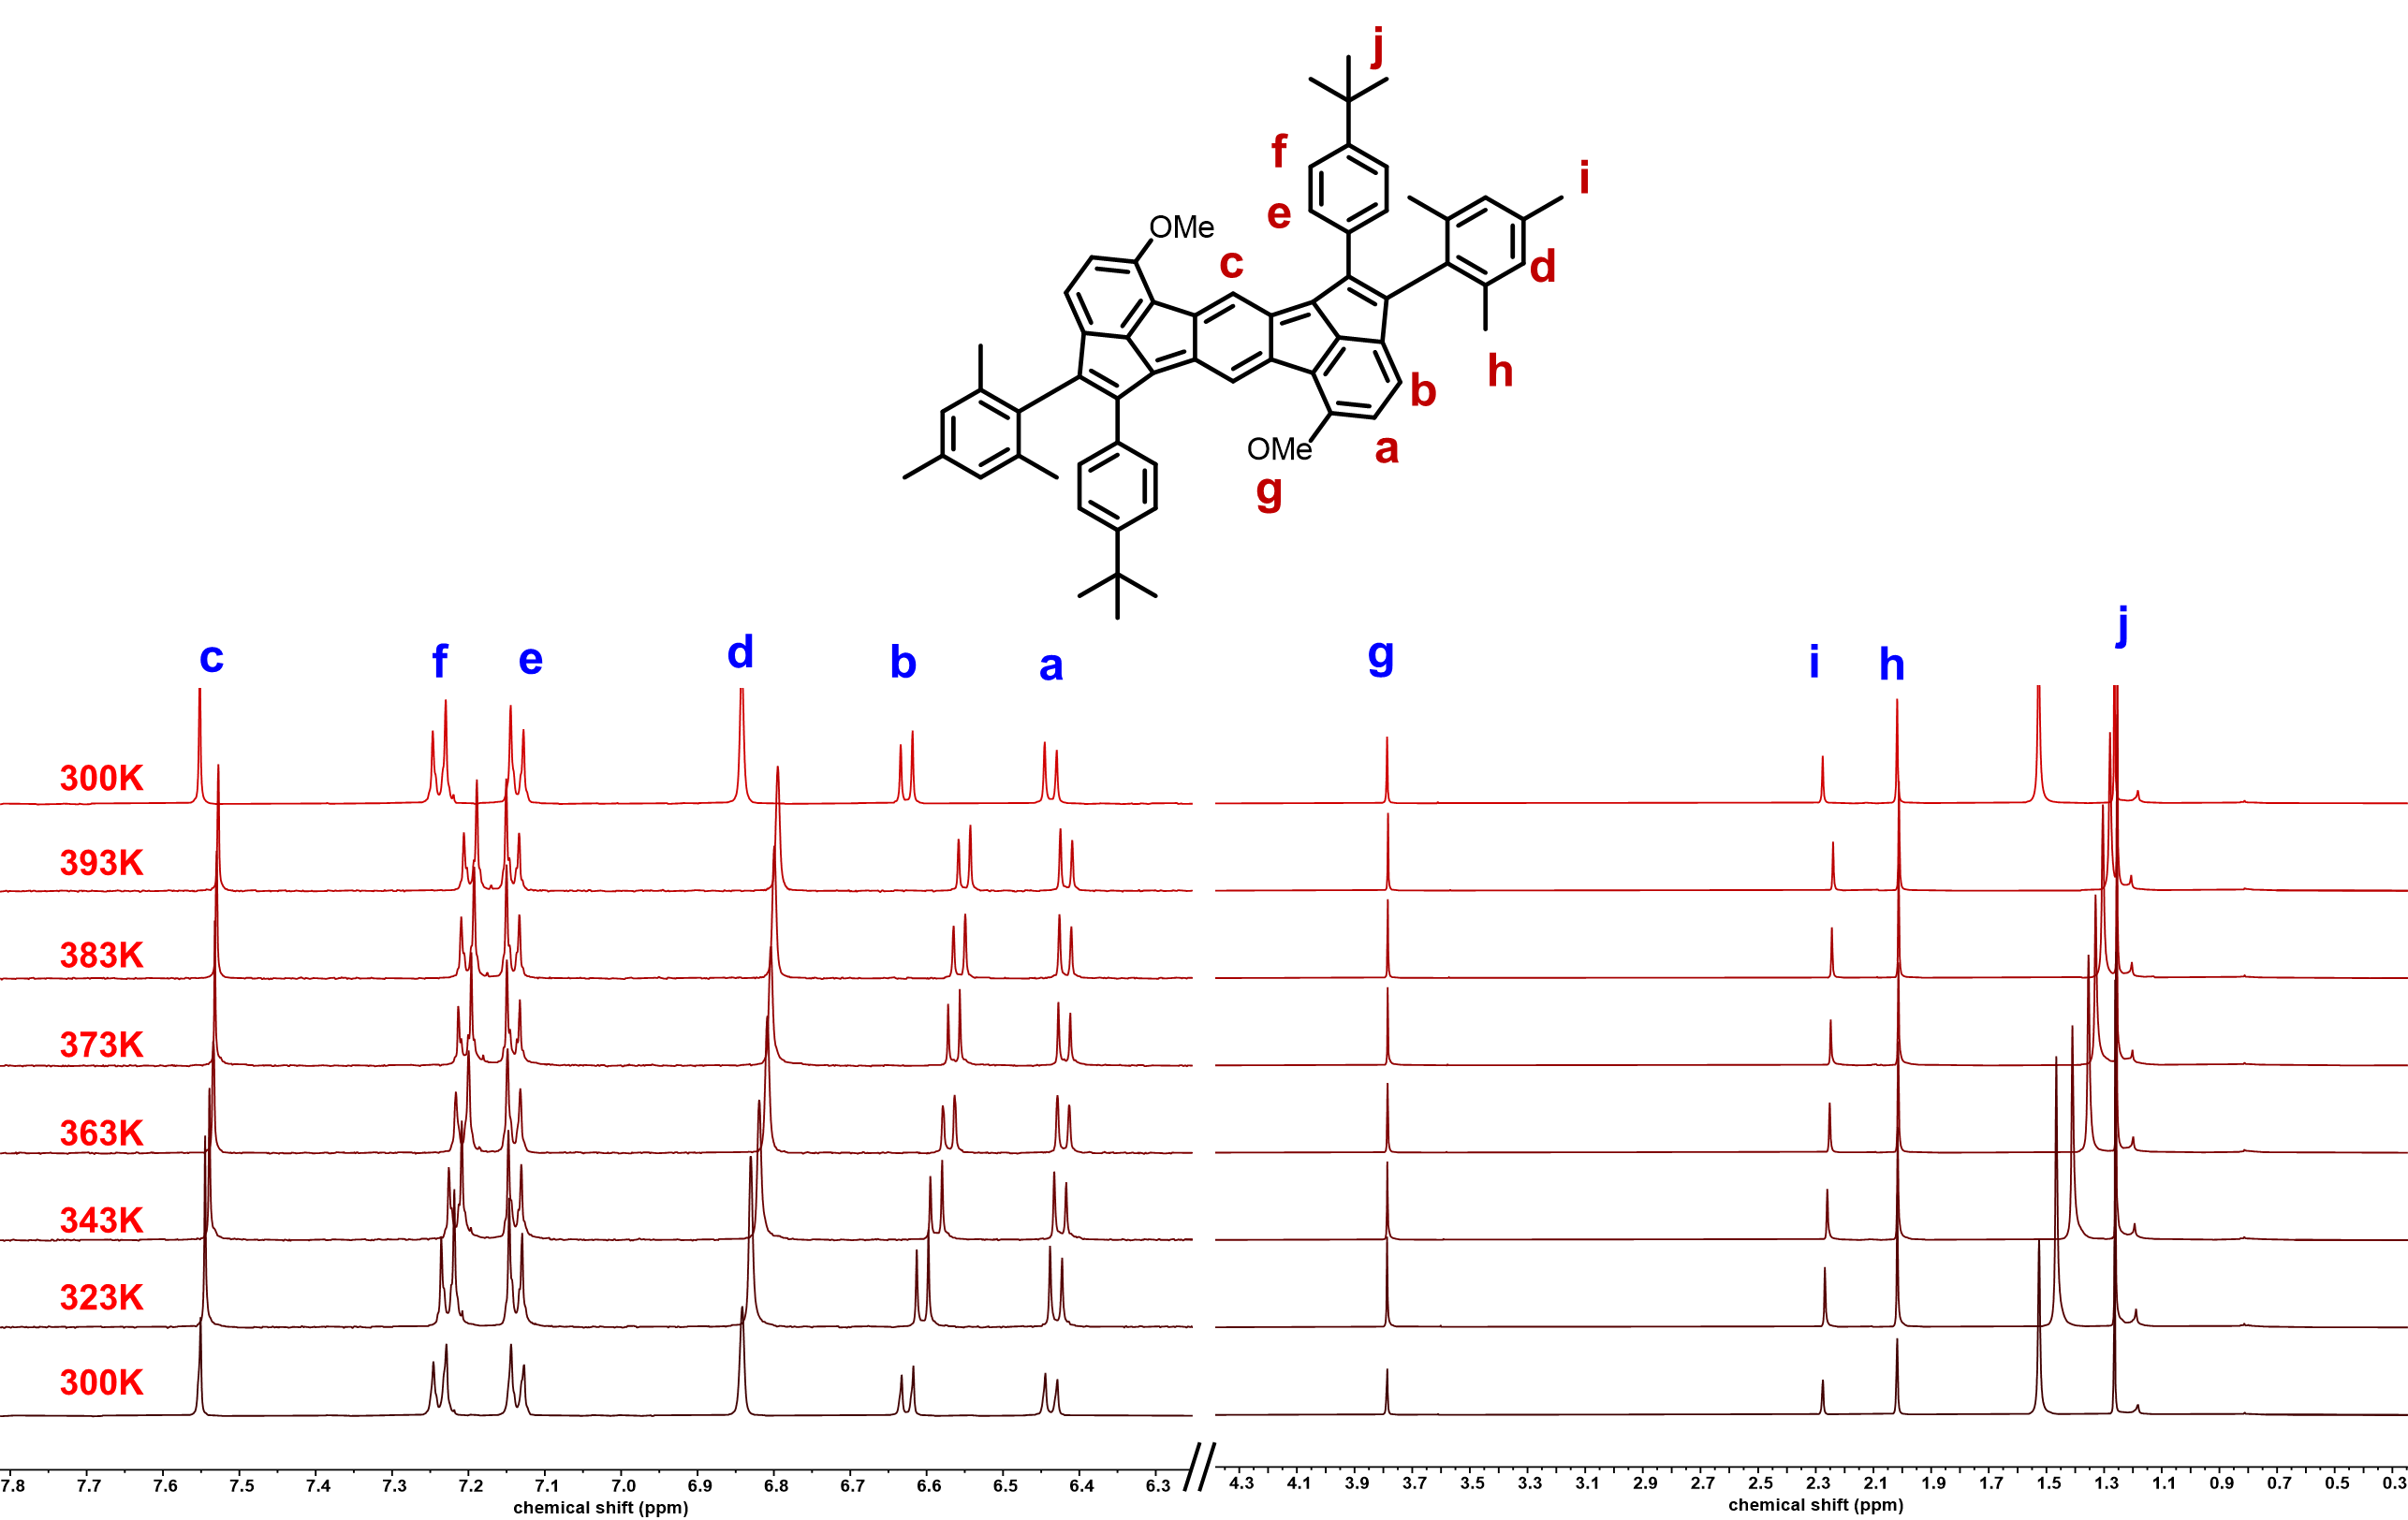
**

**Figure S24** The VT 1H NMR of **1** from 300 K to 393 K and then cooling to 300 K in C2D2Cl4 (500 MHz).


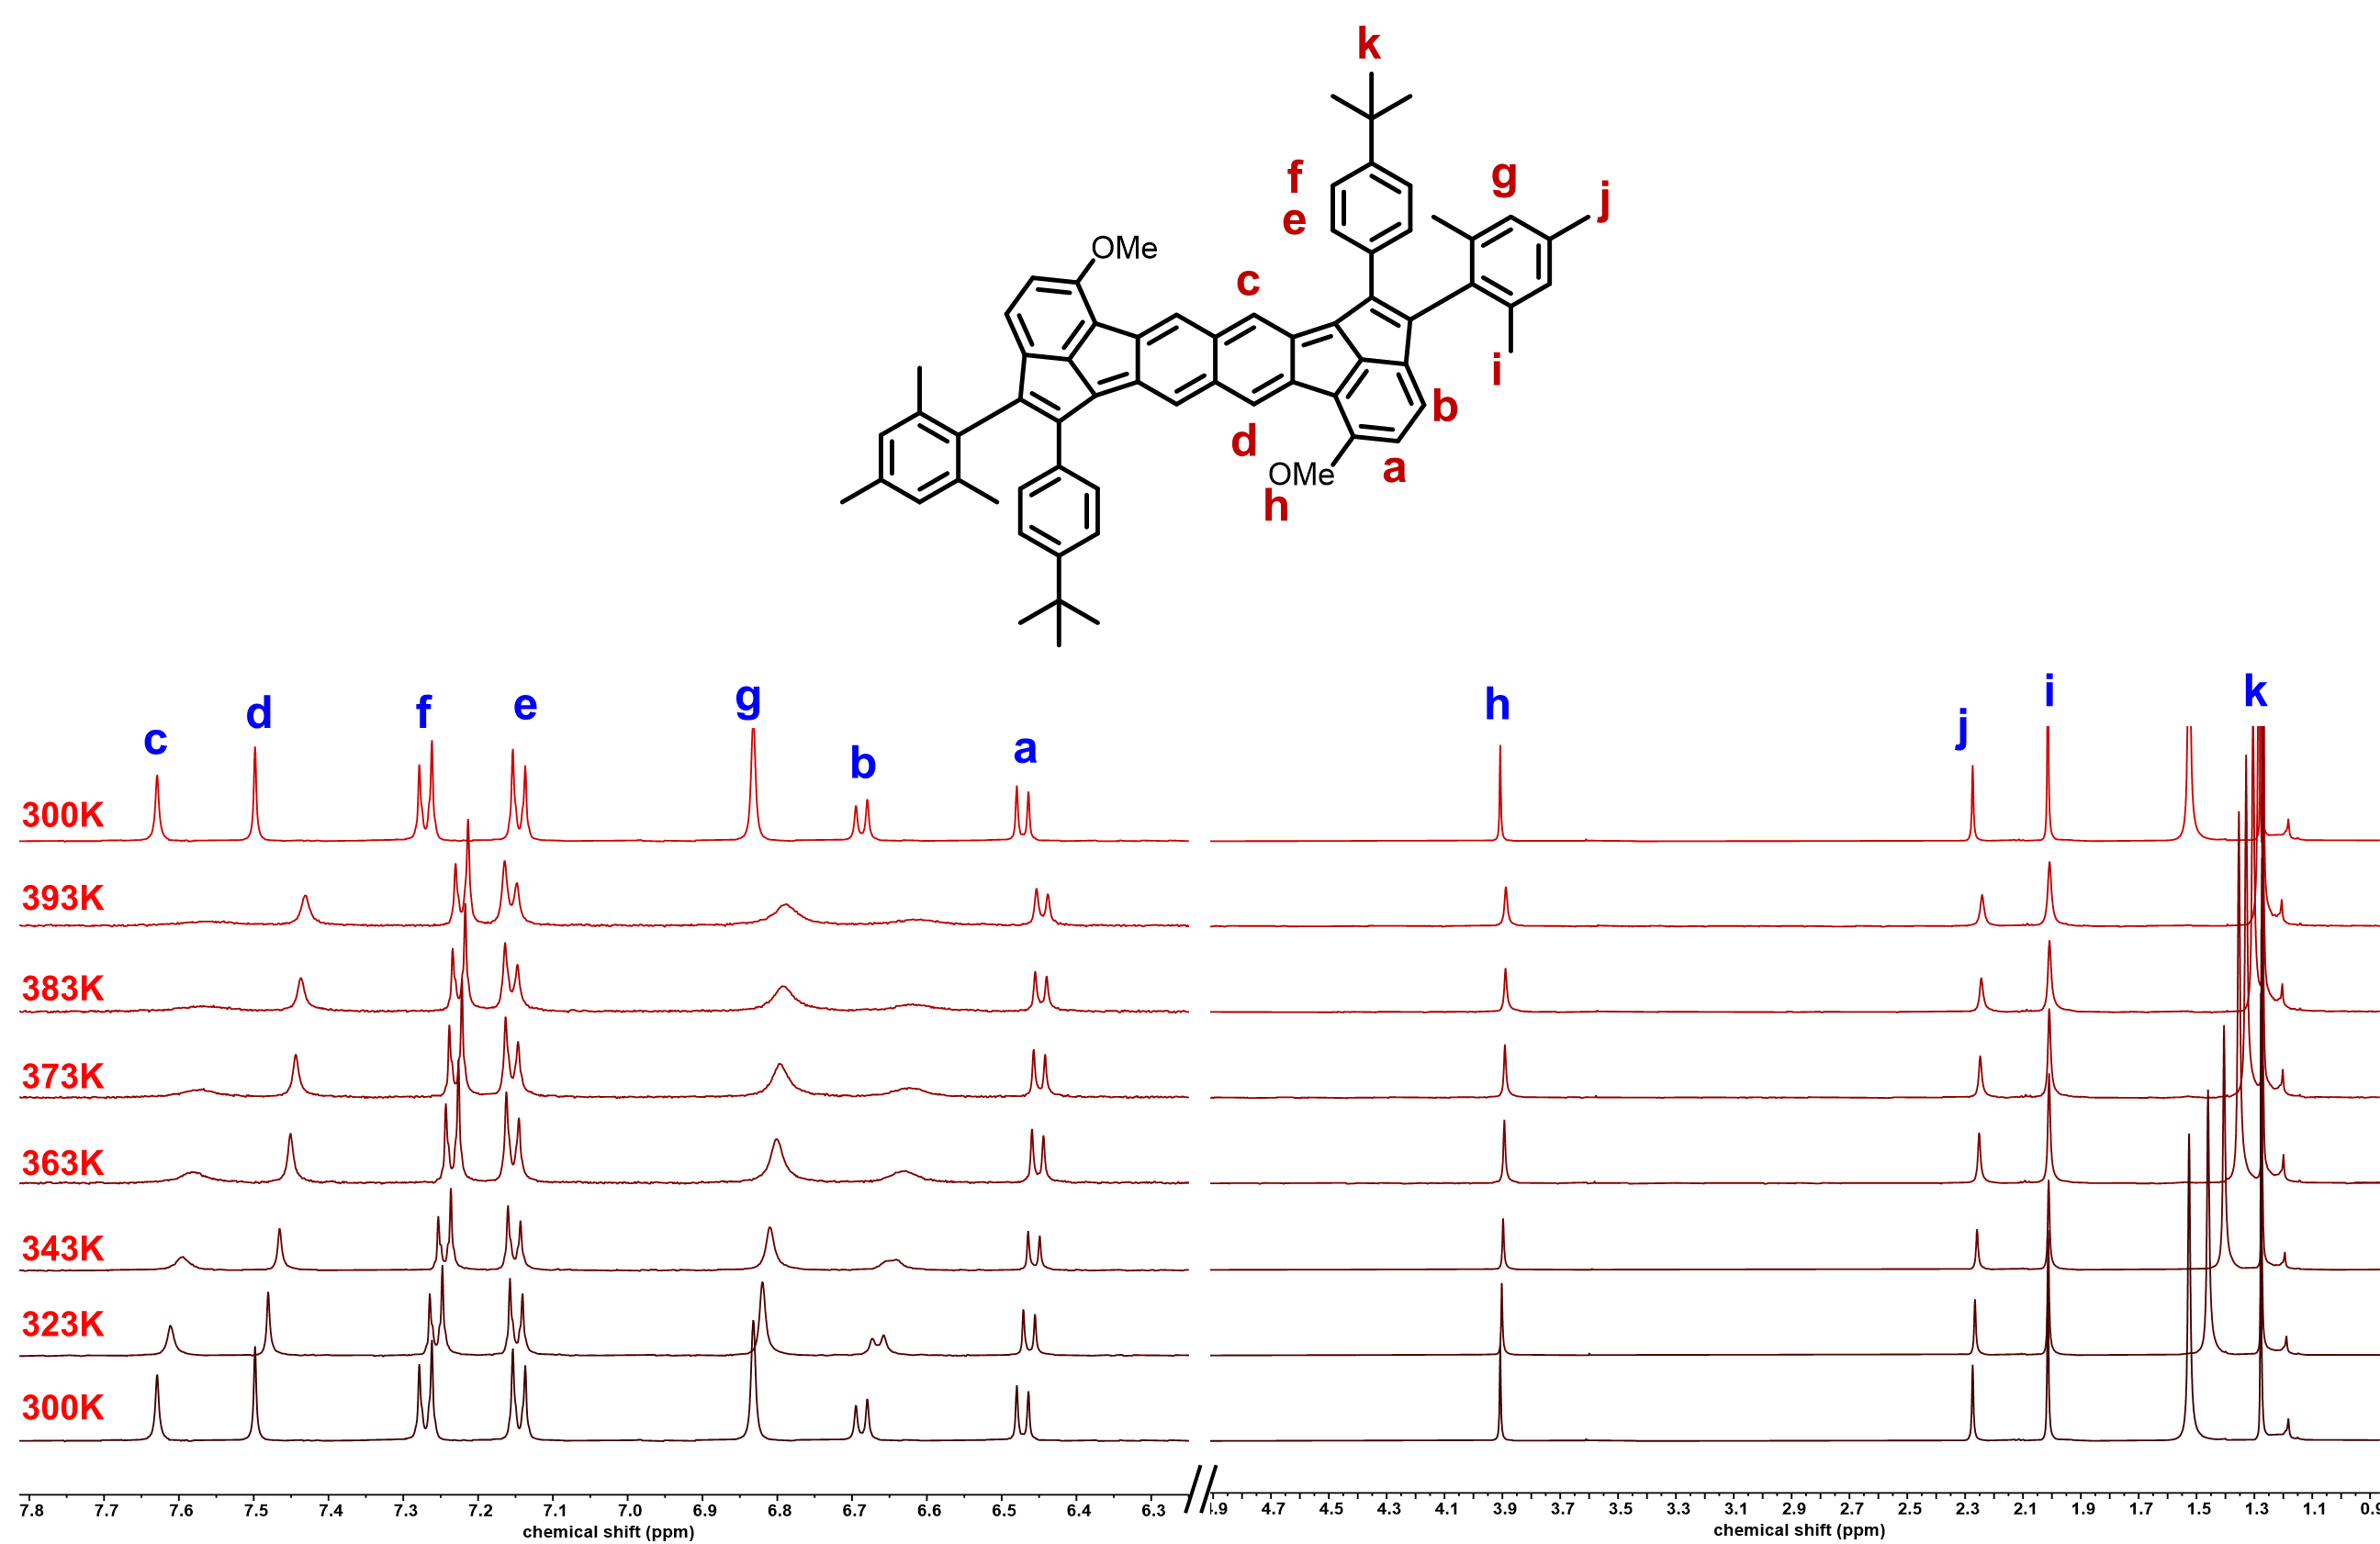


**Figure S25** The VT 1H NMR of **2** from 300 K to 393 K and then cooling to 300 K in C2D2Cl4 (500 MHz).


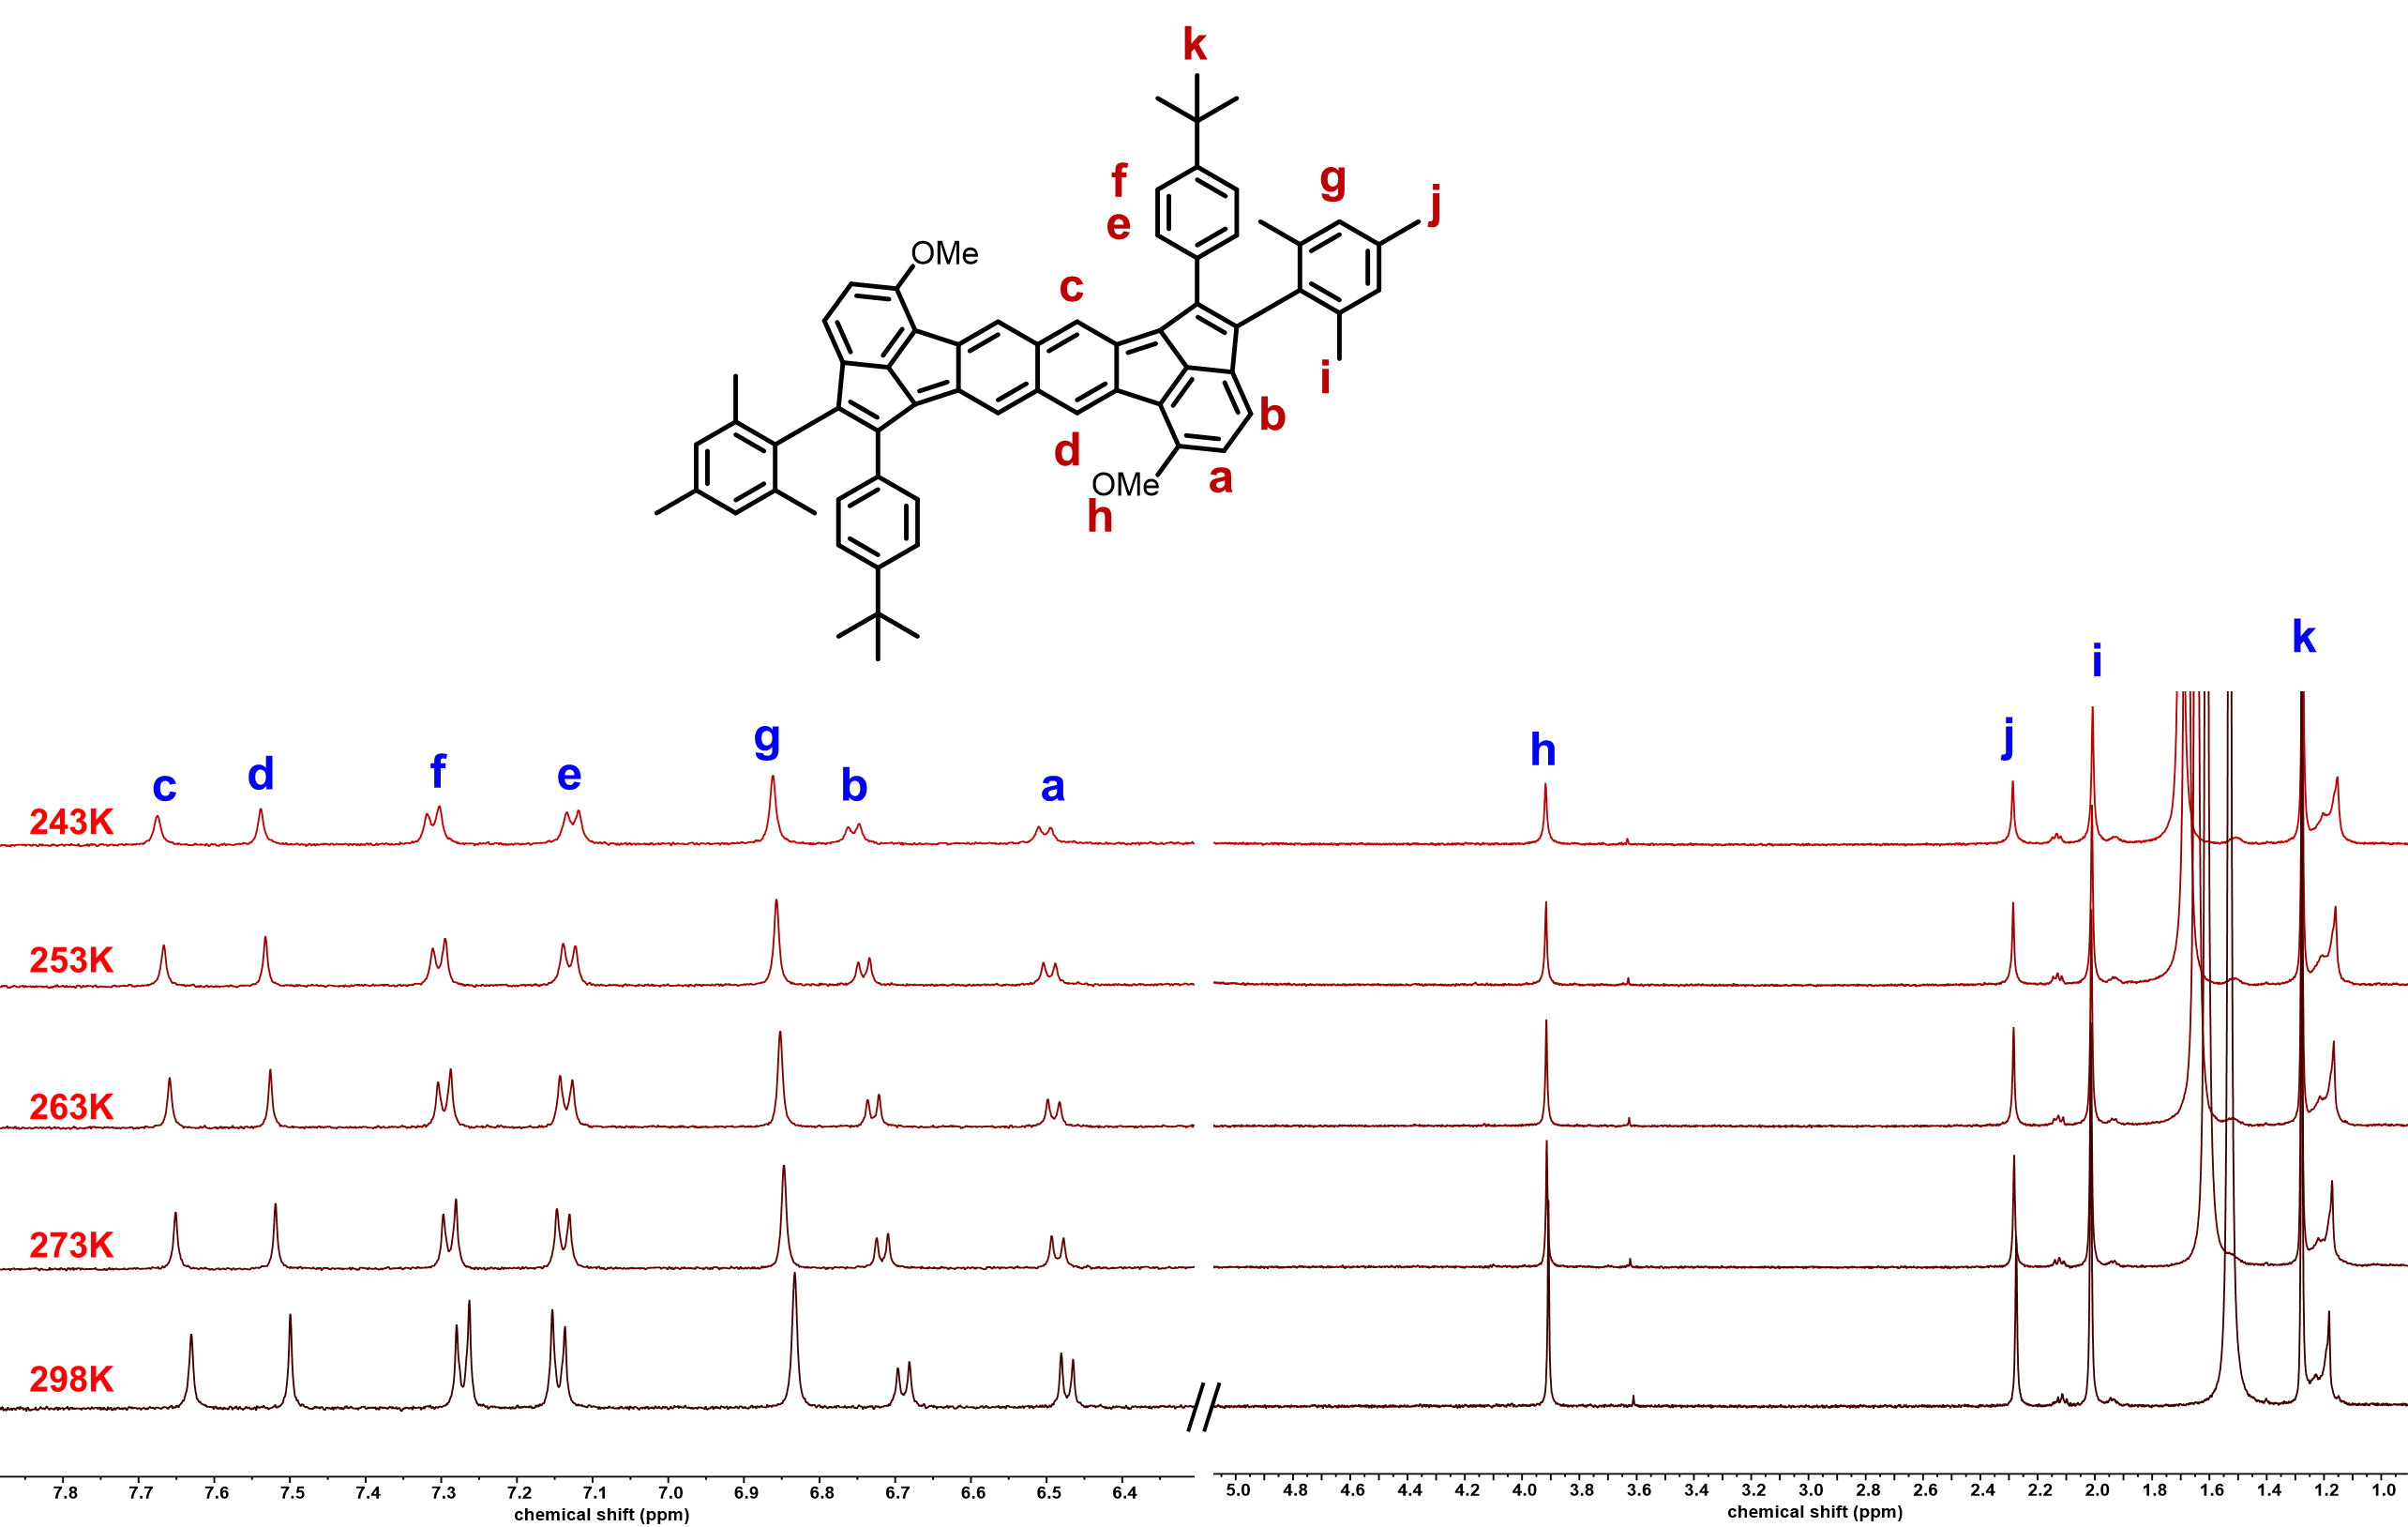


**Figure S26** The VT 1H NMR of **2** from 298 K to 243 K in C2D2Cl4 (500 MHz).


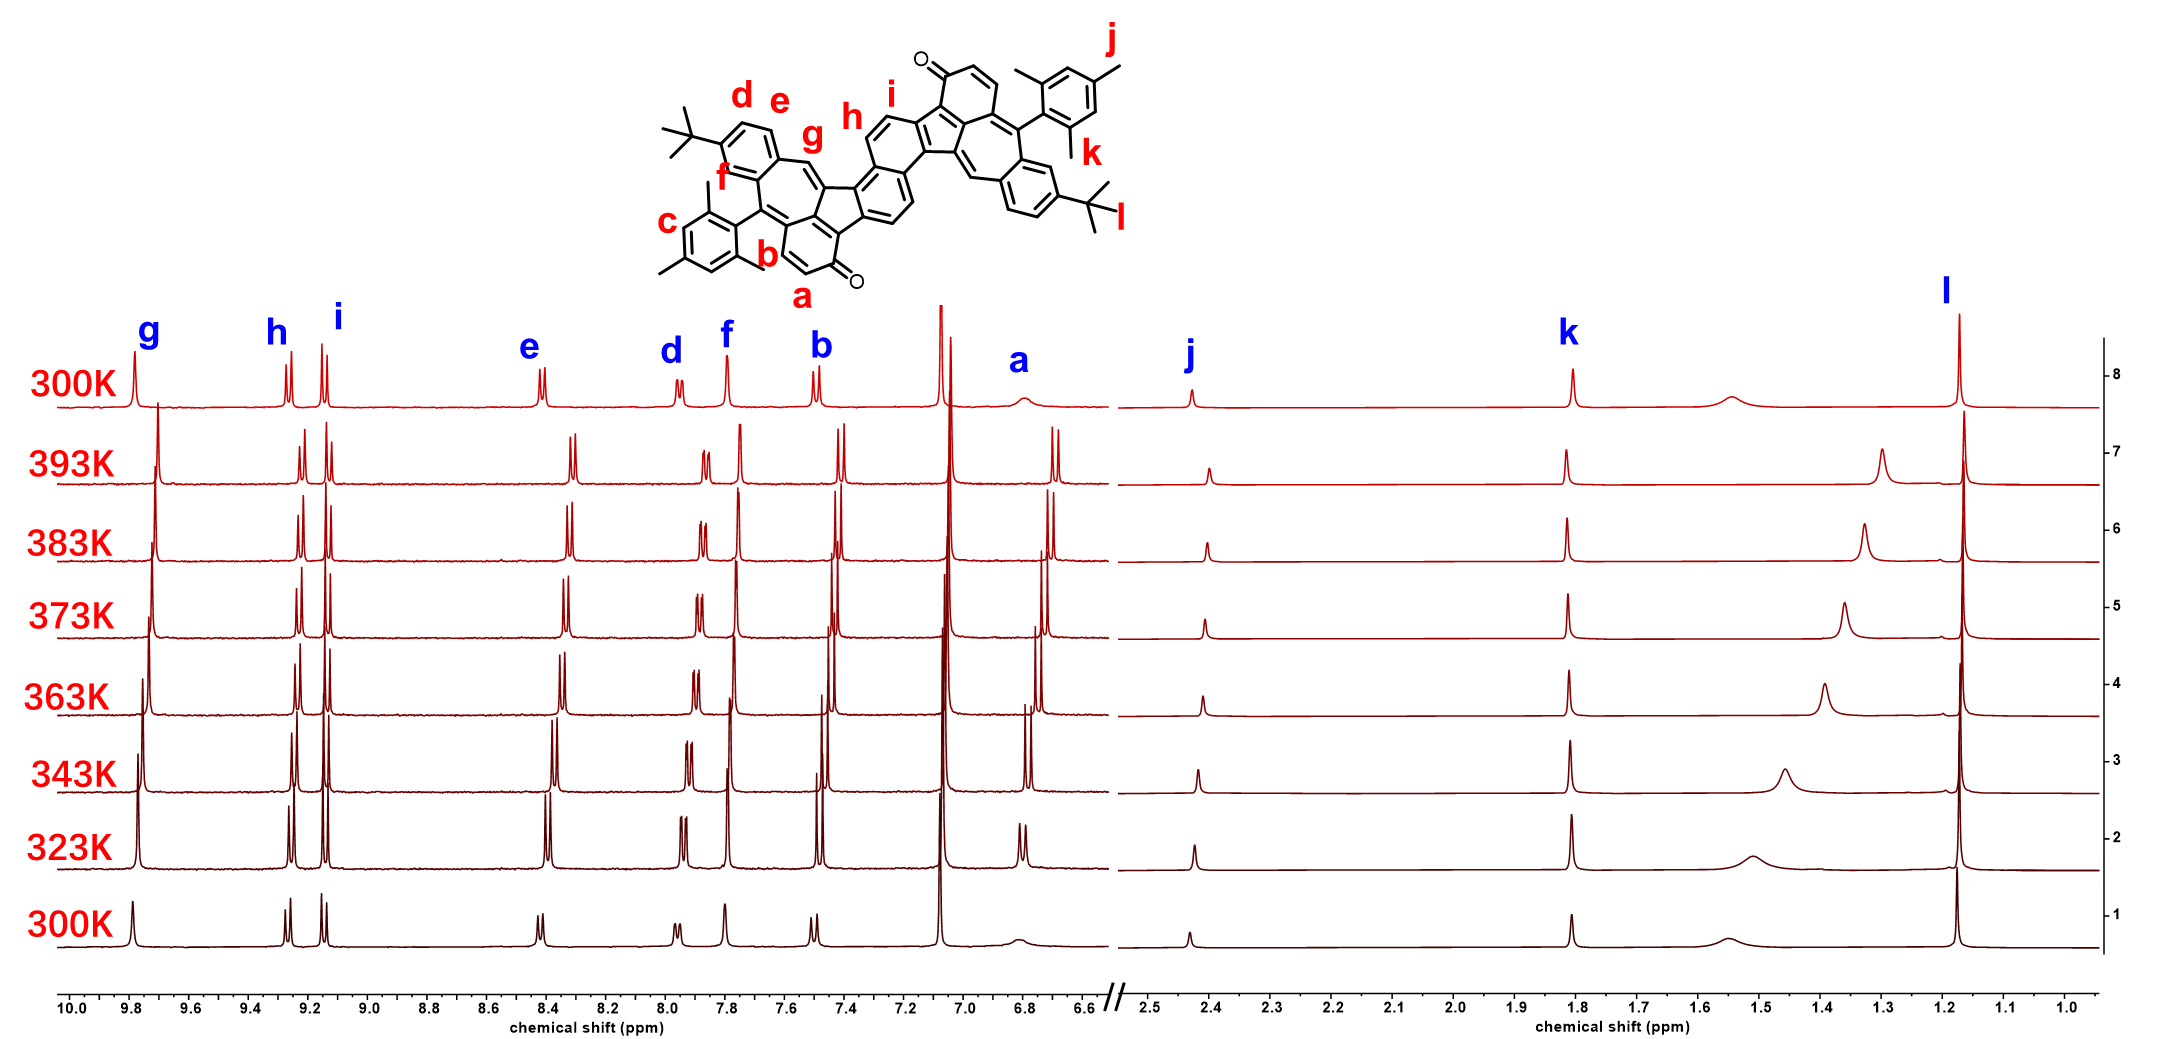


**Figure S27** The VT 1H NMR of **3** from 300 K to 393 K and then cooling to 300 K in C2D2Cl4 (500 MHz).

9. The magnetic properties


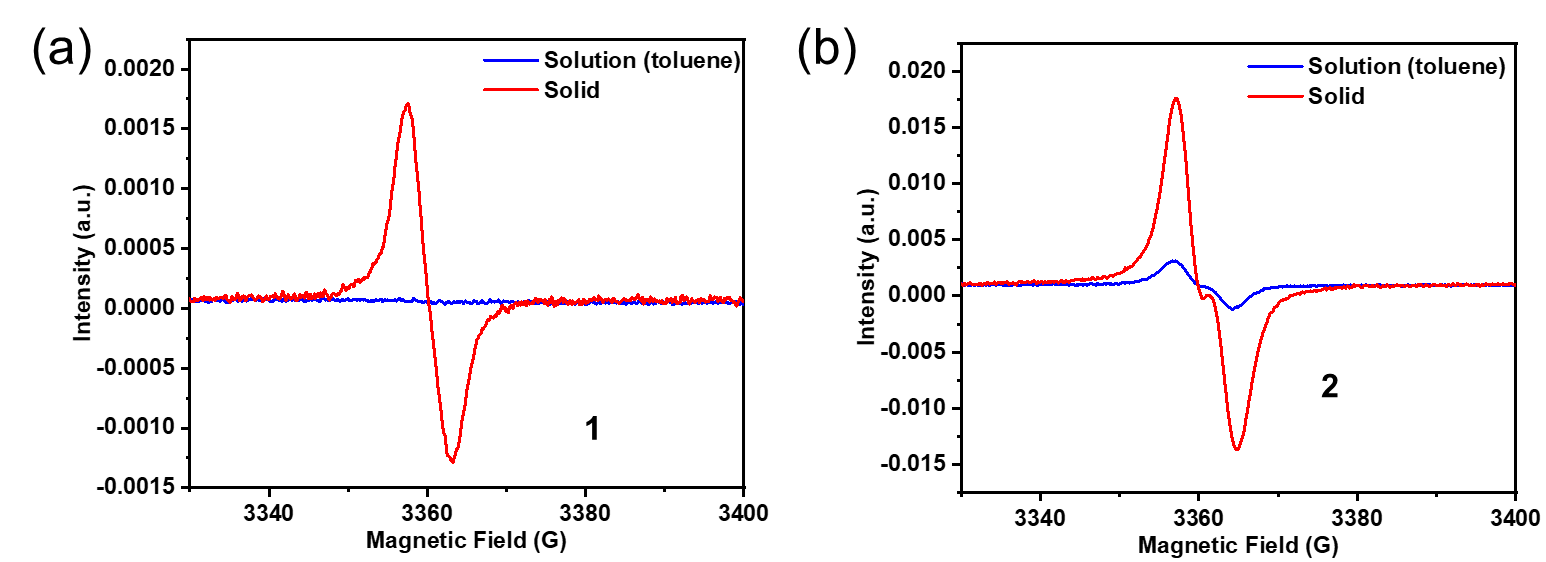


**Figure S28** The electron-spin resonance (ESR) spectra of (a) **1** and (b) **2** in toluene solution and powder at room temperature.


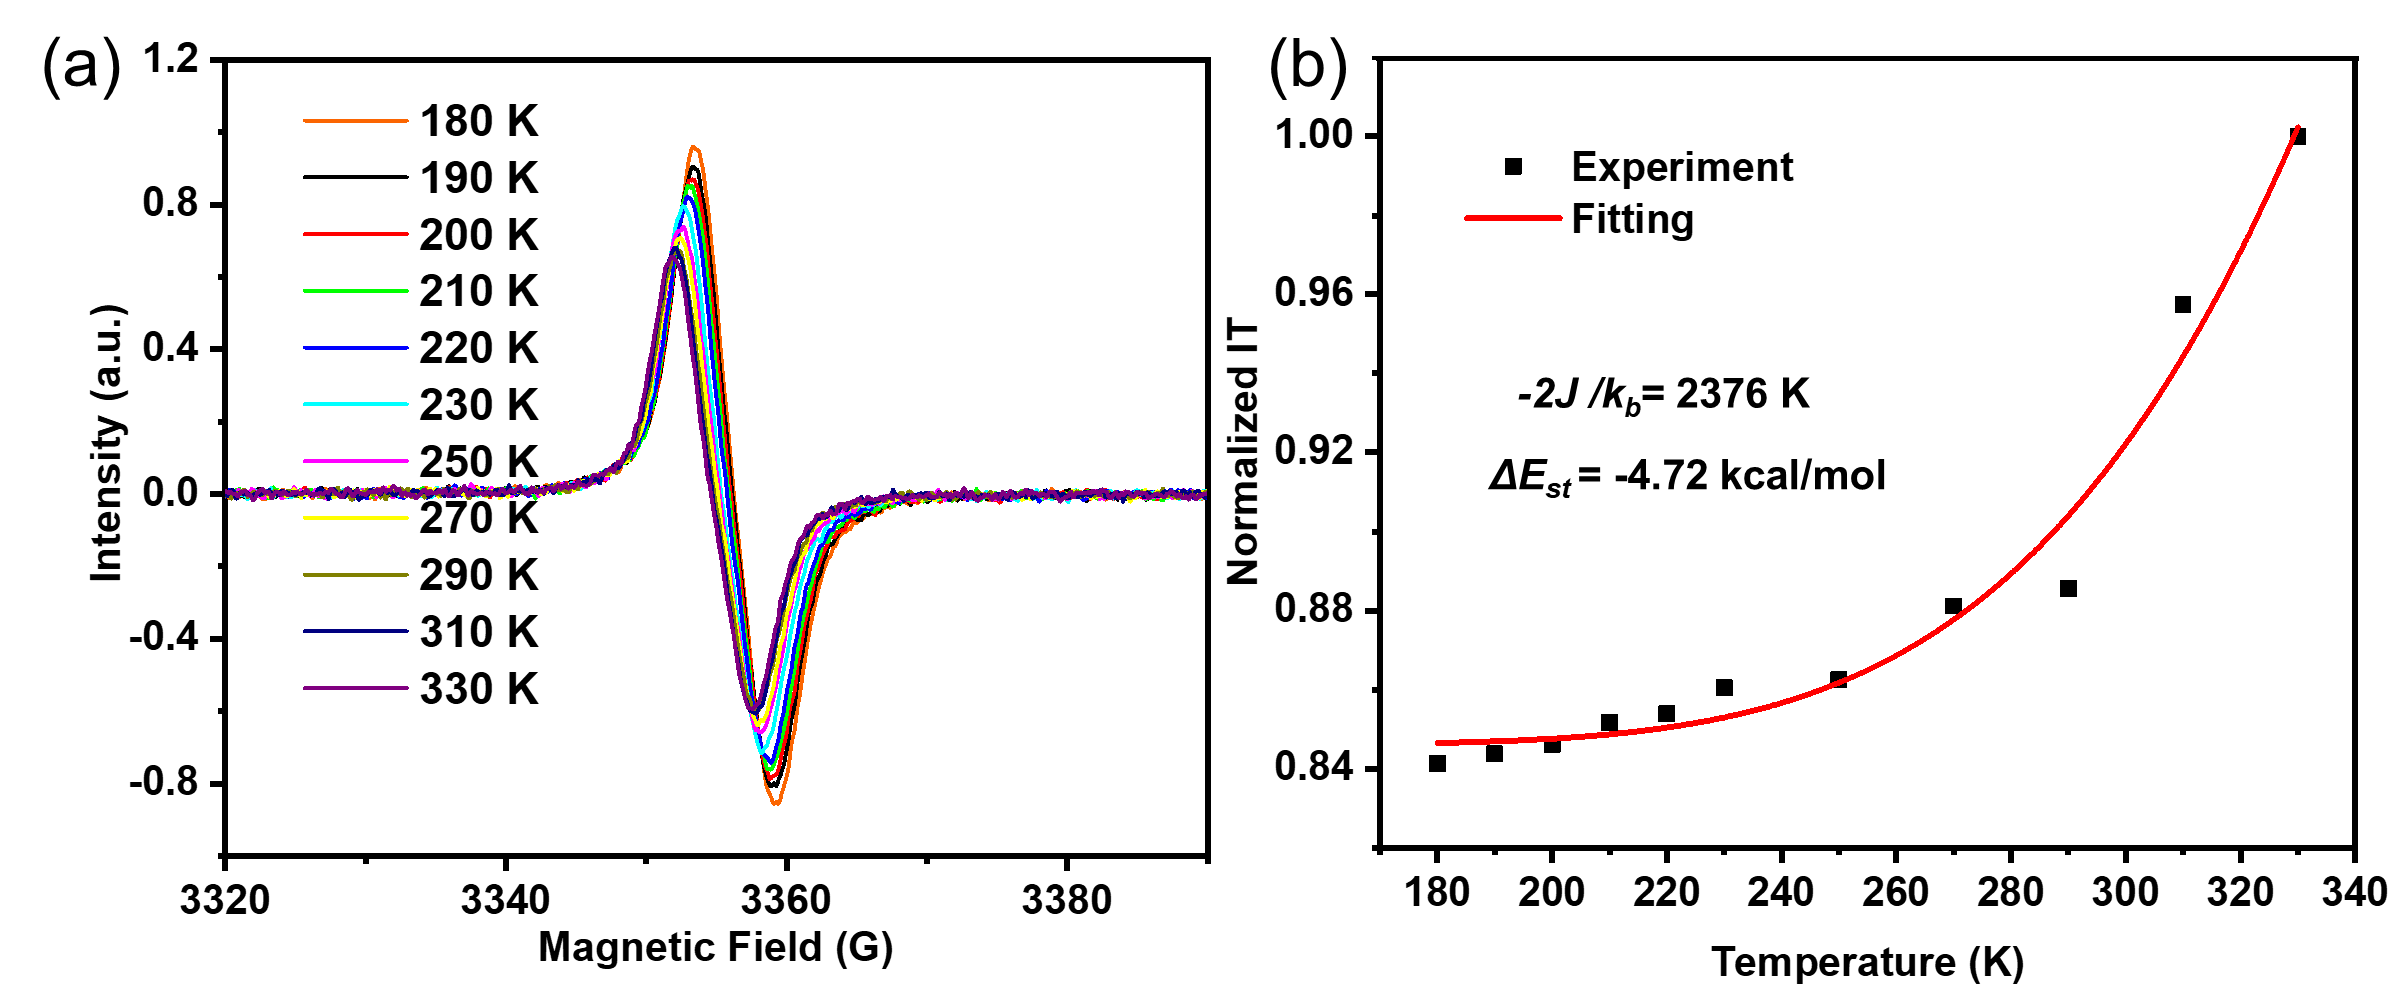


**Figure S29** (a) Temperature dependence of the ESR signals of **1** in powder state. (b) The integrated signal multiplied by temperature and fitted with the Bleaney-Bowers equation of **1**.


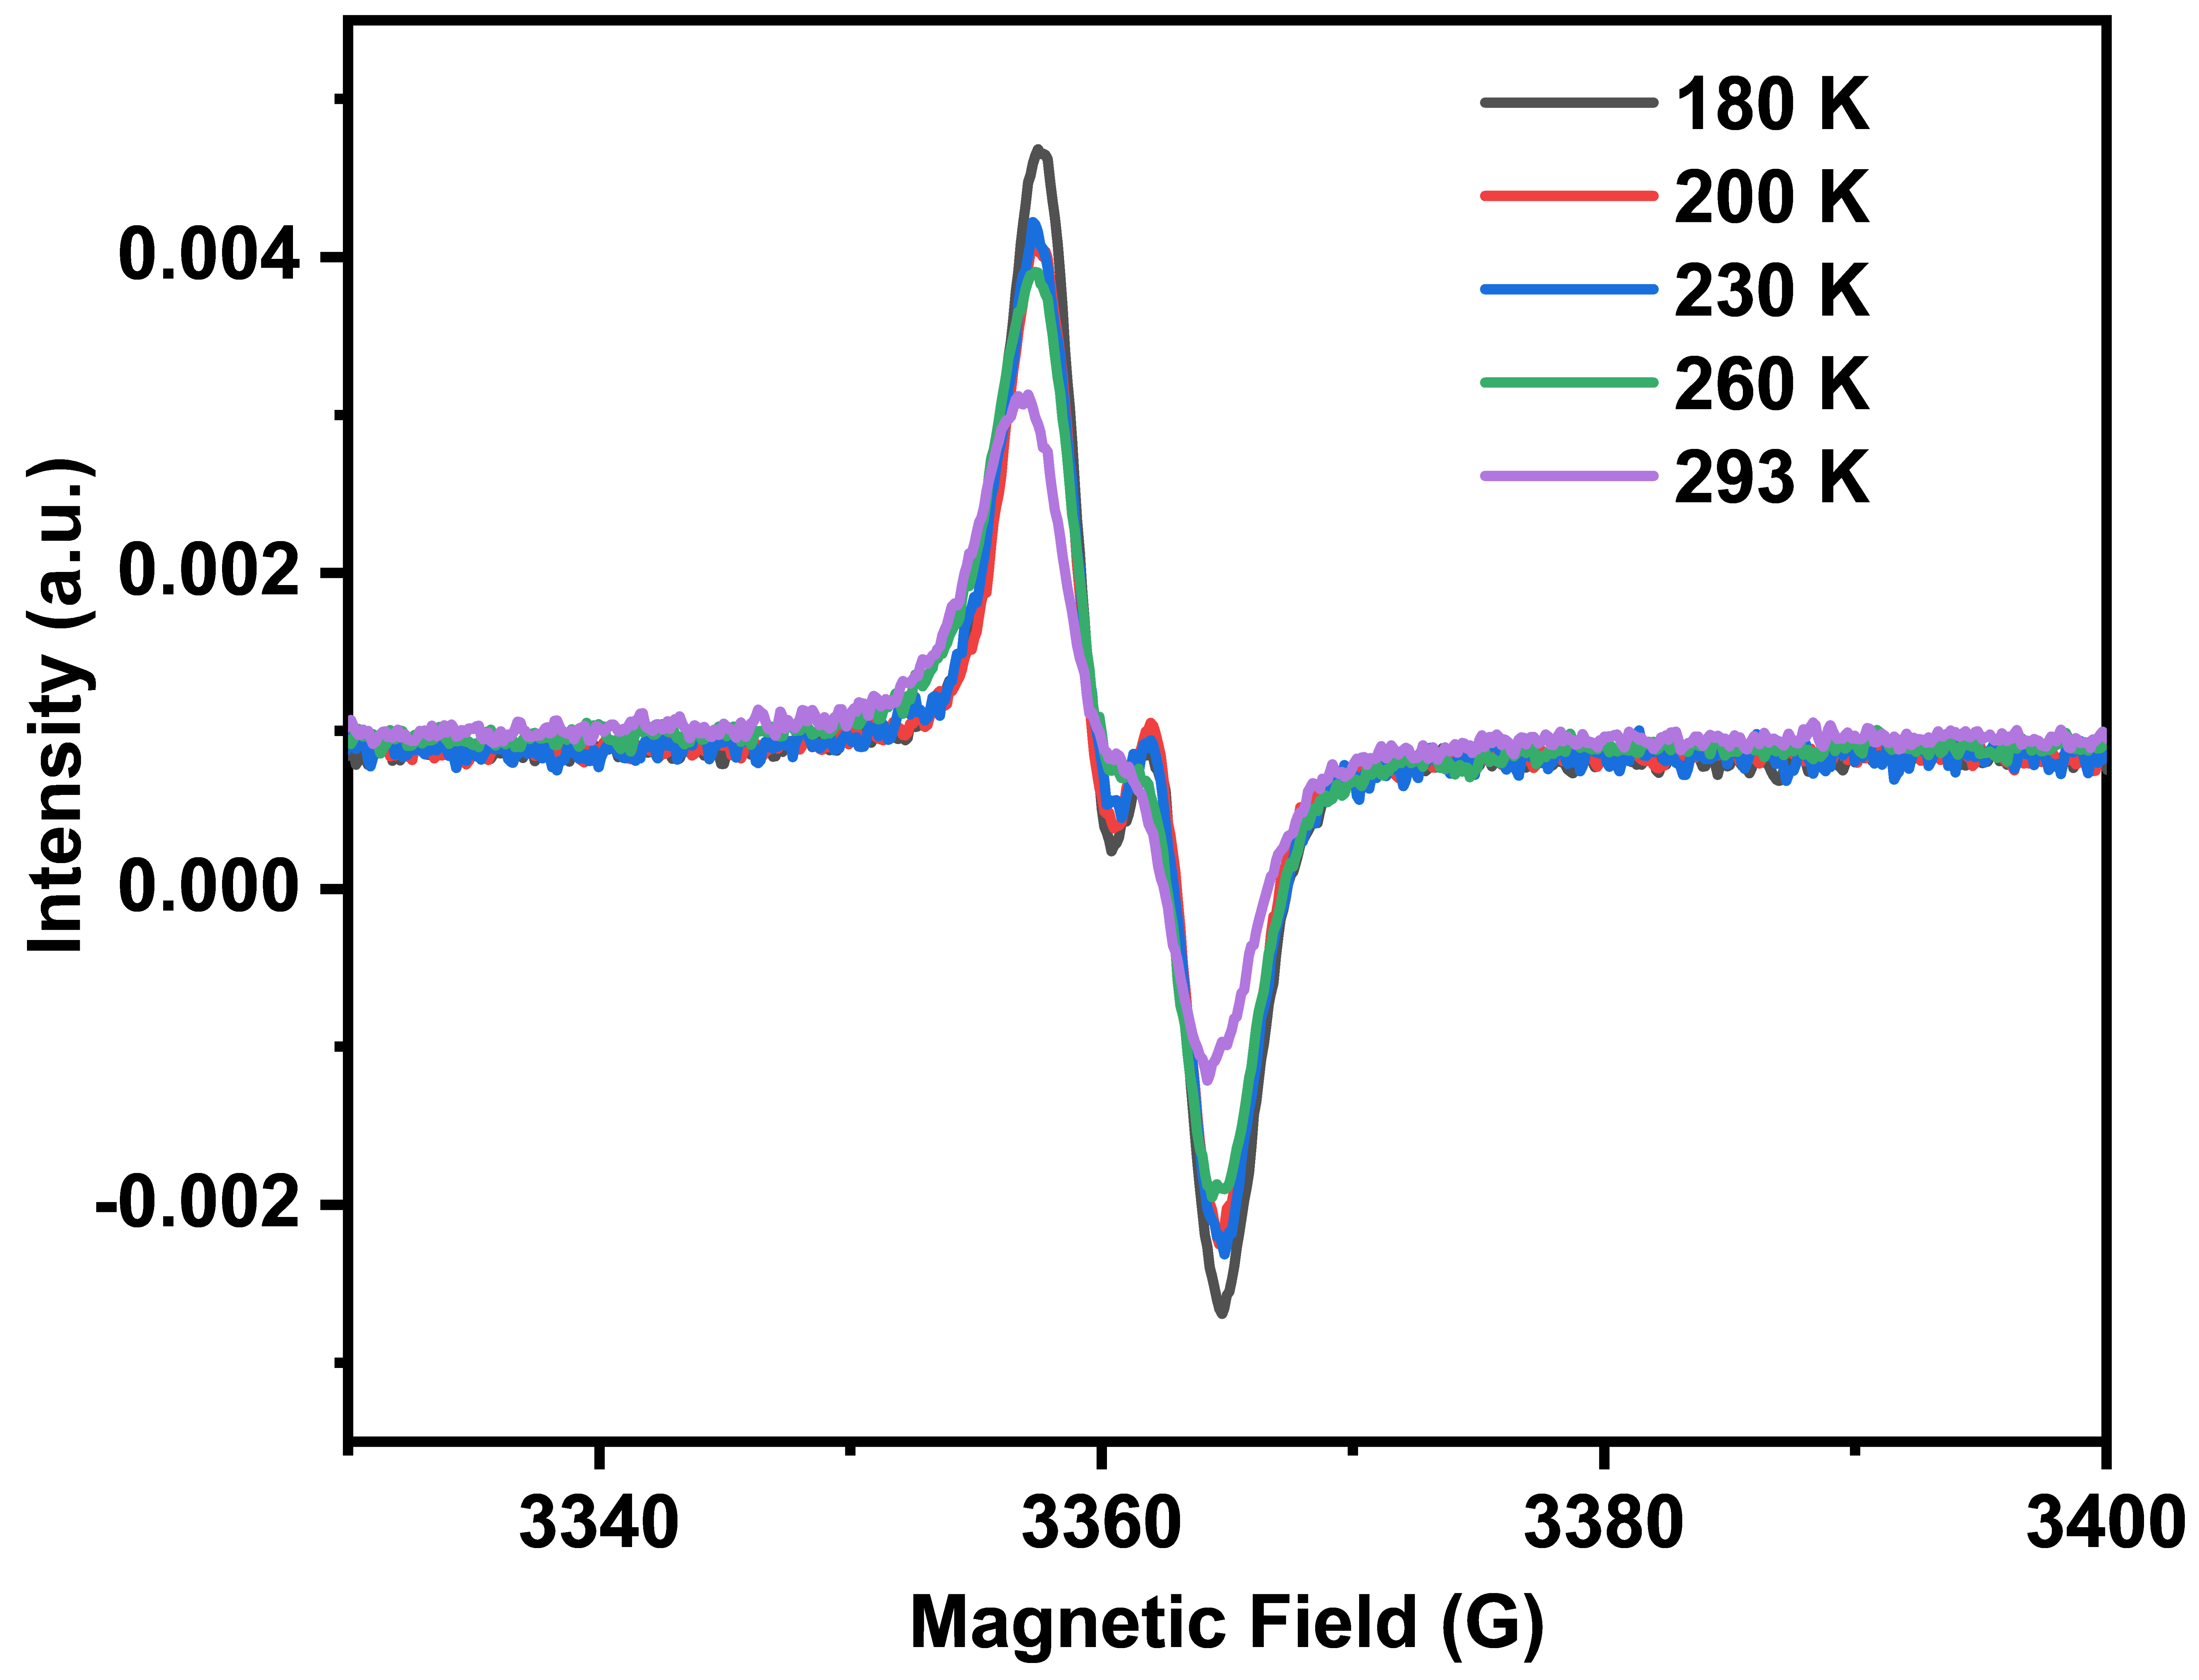


**Figure S30** VT ESR of **2** from 180 K to 293 K in toluene solution.


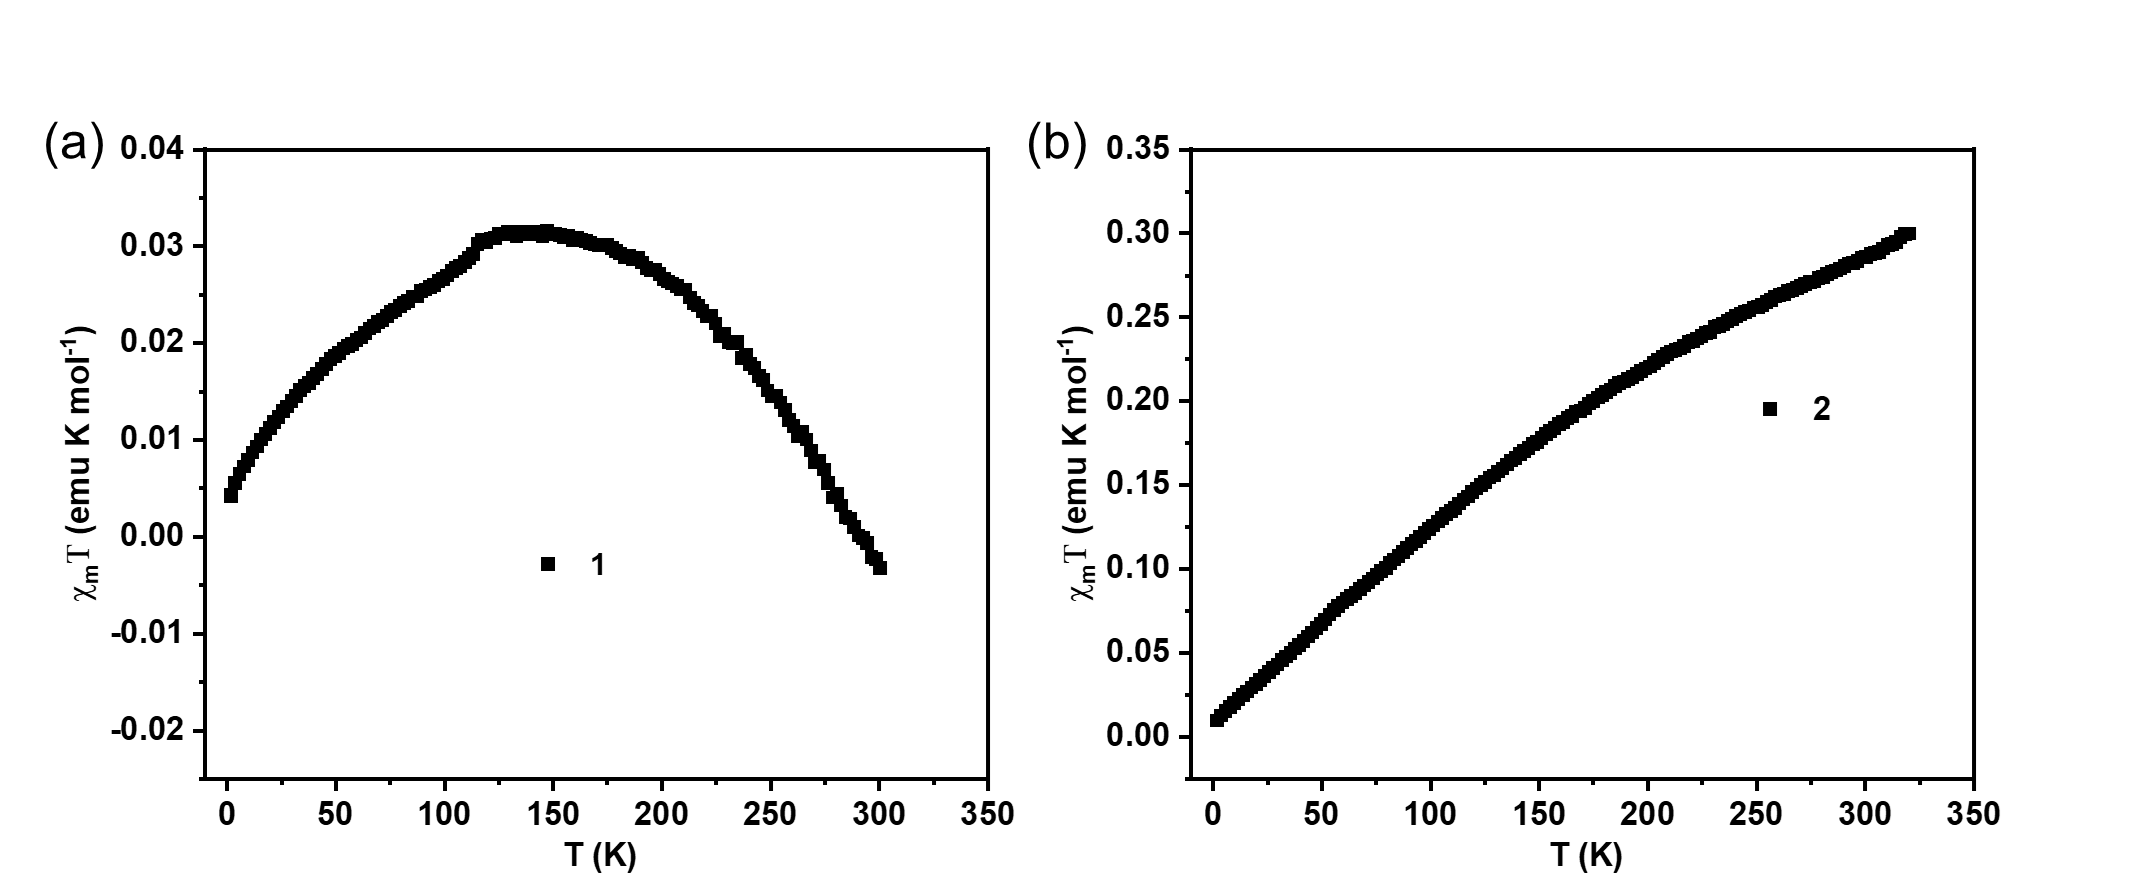


**Figure S31** SQUID measurements (black square) of the magnetic susceptibility of (a) **1** and (b) **2** from 2 to 300 K.

**Table S11** The Δ*E*st andy0 value were calculated based on (U)B3LYP-D3(BJ)/6-31G** and UCAM-B3LYP/6-31G* level, respectively.

| **Compounds** | ***E*s (Hartree)** | ***E*s (Hartree)** | ***E*t (Hartree)** | **y0** | **Δ*E*st** |
| --- | --- | --- | --- | --- | --- |
| (Close-Shell) | (Open-Shell) |  | (UCAM-B3LYP/6-31G*) | (kcal mol-1) |
| **1** | -2625.795129 |  | -2625.778545 |  |  |
| **2** | -2779.453351 | -2779.455595 | -2779.447994 | 0.38 | -7.22 |
| **3** | -2699.687238 |  | -2699.636498 |  |  |

10. OFETs fabrication and characterization

A heavily doped n-type Si wafer with a dry oxidized SiO2 layer of 300 nm was employed as the gate electrode and dielectric layer. The drain-source (D-S) gold contacts were fabricated by photo-lithography. The substrates were first cleaned by sonication in acetone and water for 5 min, and immersed in Piranha solution (7:3 mixture of sulfuric acid and 30% hydrogen peroxide) for 30 min. The substrates were further rinsed with deionized water and isopropyl alcohol for three times and they were blow-dried with nitrogen. Then, the substrate was processed by UV ozone for about 10 min. After that, the substrates were placed into a petri dish, and one drop of *n*-octadecyltrichlorosilane (OTS) was dropped into the middle of petri dish. The system was stored under vacuum at 120 oC for 4 h to form an OTS self-assembled monolayer. After the substrate surfaces were modified with OTS, they were washed with *n*-hexane, CHCl3 and isopropyl alcohol sequentially. Next, thin films of **2** were prepared by drop-coating of their toluene solutions (8.0 mg/mL, 10 μL) onto the modified substrates, and the substrate was pre-heated at 100 oC. After the solvent dried, the devices can be measured directly under an air atmosphere. The transfer and output curves of FETs were measured at room temperature in an air atmosphere using a Keithley 4200 SCS semiconductor parameter analyzer. The charge mobility of the OFETs in the saturation region was extracted from the following equation:

*I*DS= *μCi*(*V*GS-*V*Th)2 *W*/2*L*

Where *I*DS is the current collected by the drain electrode; *L* and *W* are the channel length and width, respectively; *μ* is the mobility of the device; *Ci*is the capacitance per unit area of the gate dielectric layer (11 nF/cm2); *V*GS is the gate voltage, and *V*Th is the threshold voltage, respectively. The *VTh* of the device was obtained by extrapolating the (*I*DS,sat)1/2 vs. *V*GS plot to *I*DS = 0.

**Table S12** The FETs performance of BGBC devices based on the **2** thin films. The width (*W*) and length (*L*) of the conductive channel are 1440 μm, and 5 μm, respectively.

| **Compound** | *μmax*(cm2V-1s-1)a | *μave*(cm2V-1s-1)b | *Vth*(V)c | *Ion*/*Ioffd* |
| --- | --- | --- | --- | --- |
| **2** | 0.083 | 0.064 | 0.6-3.3 | 103-104 |

a maximum hole mobility; b average hole mobility; c threshold voltage; d current on/off ratio. The average mobility was obtained based on 13 FET devices.

11. Other substrates used for this synthetic strategy

*12.1 Synthesis and characterization of* ***25-1a****,* ***25-2a****,* ***25-3a*** *and* ***26-1a***


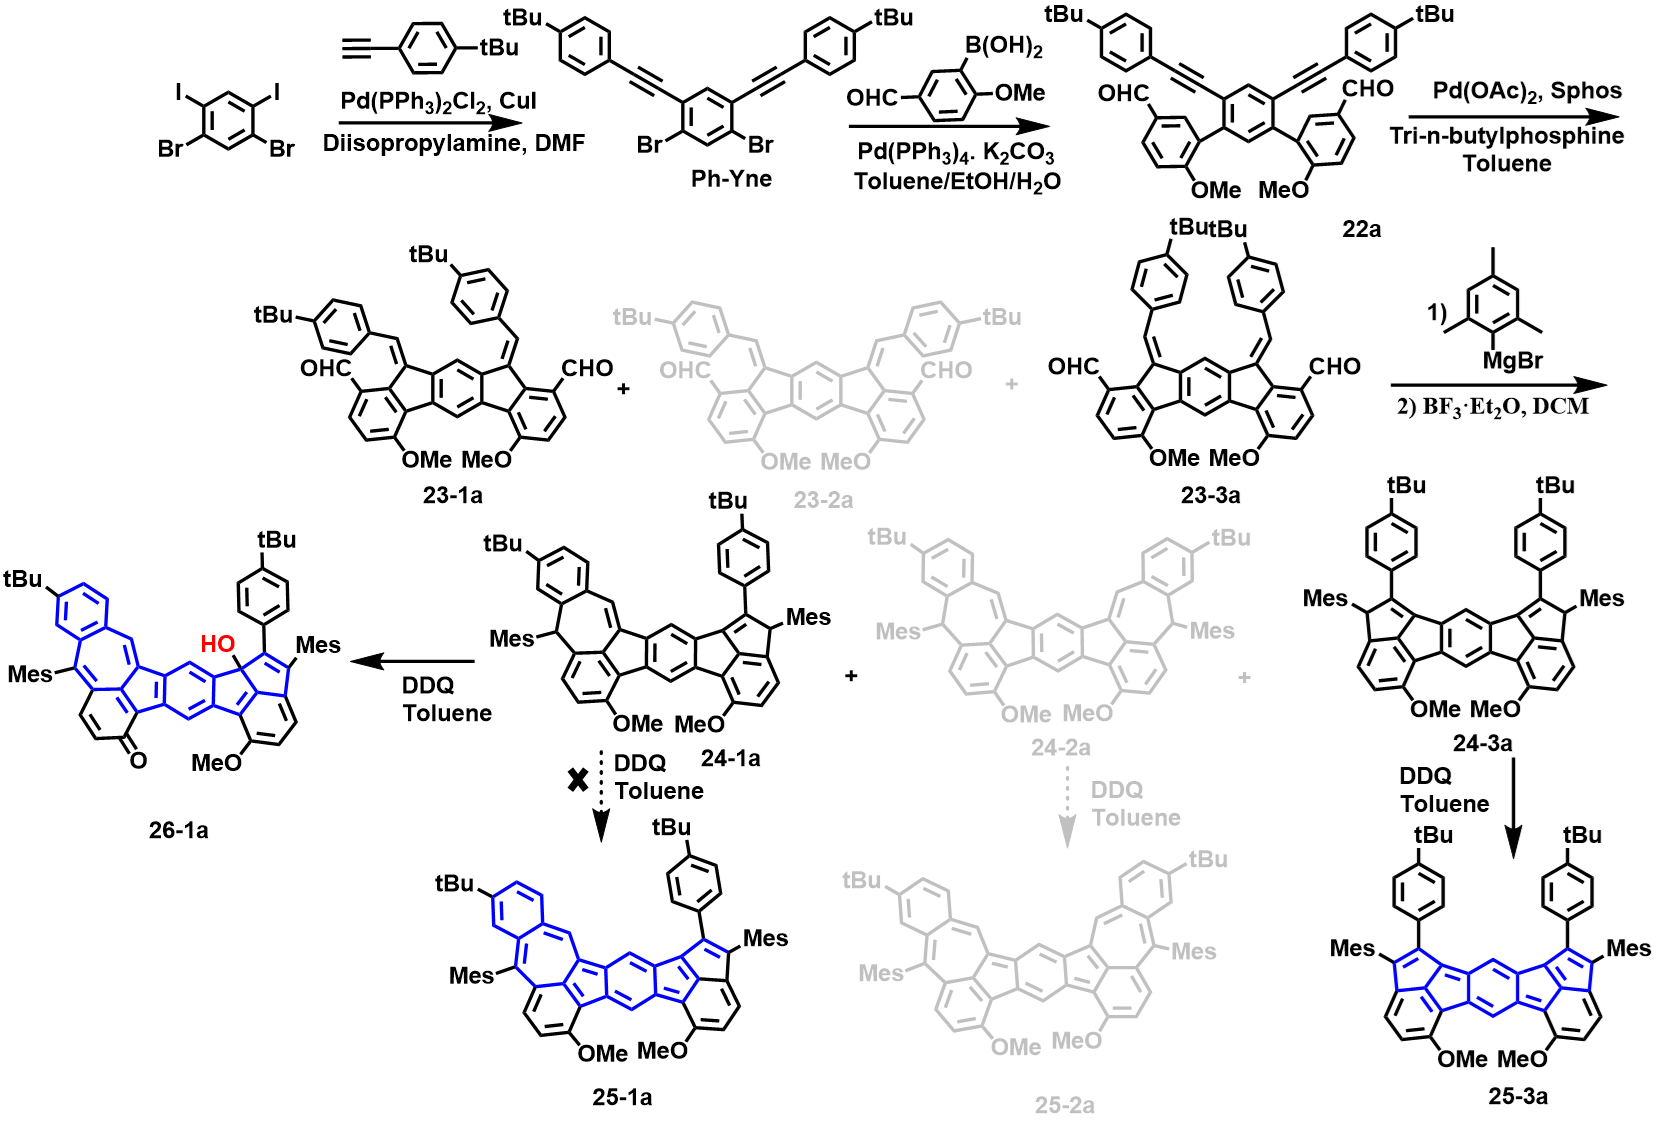


**Scheme S4** The synthetic routes of compound ***25-1a****,* ***25-2a****,* ***25-3a*** *and* ***26-1a***.

*Synthesis of compound* ***Ph-Yne***

A 250 mL two-necked flask equipped with a magnetic stir bar was added 1,5-Dibromo-2,4-diiodobenzene (4 g, 8.2 mmol), Pd(PPh3)2Cl2 (595 mg, 0.82 mmol) and CuI (311 mg, 1.64 mmol). The mixture was degassed and charged with nitrogen for three times and then 1-(tert-butyl)-4-ethynylbenzene (2.591 g, 16.4 mmol), diisopropylamine (20 mL) and DMF (40 mL) were added subsequently. The mixture was stirred at room temperature overnight. The reaction was quenched with hydrochloric acid solution (1 M, 100 mL), and the mixture was extracted with dichloromethane (100 mL×3) and washed with hydrochloric acid solution (1 M, 100 mL×2). The organic layer was dried with anhydrous Na2SO4 and concentrated under reduced pressure. The crude product was then purified by flash column chromatography using petroleum ether (b.p. 60-90 oC) and dichloromethane (1/0~5/1, v/v) as eluent to give compound ***Ph-Yne*** as a white solid (4.323 g, 96.5% yield).

1H NMR (400 MHz, CDCl3, 298 K) δ (ppm) 7.87 (s, 1H), 7.71 (s, 1H), 7.51 (d, *J* = 7.0 Hz, 4H), 7.39 (d, *J* = 7.0 Hz, 4H), 1.33 (s, 18H).

13C NMR (101 MHz, CDCl3 298 K) δ (ppm) 152.4, 136.4, 135.7, 132.3, 131.5, 125.5, 125.0, 119.5, 95.5, 86.1, 34.9, 31.2.

HRMS (MALDI-FTICR) m/z: [M]+ calcd for C30H28Br2 546.0552; found 546.0551.

*Synthesis of compound* ***22a***

To a 250 mL three-necked flask equipped with a magnetic stir bar, compound **Ph-Yne** (3.0 g, 5.5 mmol), 2-methoxy-5-formylphenylboronic acid (2.97 g, 16.5 mmol), K2CO3 (3.795 g, 27.5 mmol) and Pd(PPh3)4 (317 mg, 0.275 mmol) were added. The mixture was degassed and charged with nitrogen for three times. Then toluene (100 mL), ethanol (15 mL) and water (15 mL) were added to the flask. The mixture was heated at 110 oC (oil bath) overnight. After cooling to room temperature, the solvent was removed by rotary evaporation. The crude product was then purified by flash column chromatography using dichloromethane and ethyl acetate (1/0~20/1, v/v) as eluent to give compound **22a** as a light-yellow solid. (2.972 g, 82.1% yield).

1H NMR (400 MHz, CDCl3, 298 K) δ (ppm) 9.96 (s, 2H), 7.99 (s, 2H), 7.97 (d, *J* = 8.4 Hz, 2H), 7.91 (s, 1H), 7.43 (s, 1H), 7.29 (d, *J* = 8.6 Hz, 4H), 7.14 (m, 6H), 3.90 (s, 6H), 1.29 (s, 18H).

13C NMR (101 MHz, CDCl3 298 K) δ (ppm) 190.9, 162.1, 151.7, 139.0, 135.4, 133.5, 131.8, 131.7, 131.1, 129.9, 129.5, 125.4, 123.0, 120.1, 111.0, 93.0, 87.4, 56.1, 34.8, 31.2.

HRMS (MALDI-FTICR) m/z: [M]+ calcd for C46H42O4 658.3077; found 658.3078.

*Synthesis of compound* ***23a***

To a Pyrex tube equipped with a magnetic stir bar, compound **22a** (50 mg × 25, 1.90 mmol), Pd(OAc)2 (2.2 mg × 25, 0.24 mmol), 2-dicyclohexylphosphino-2',6'-dimethoxybiphenyl (Sphos, 6.8 mg × 25, 0.43 mmol), Tri-n-butylphosphine (20 μL × 25, 2.0 mmol) and toluene (2 mL × 25) were added sequentially. Then, through a freeze-pump-thaw cycle, the tube was charged with nitrogen for three times again. After rising to room temperature, the mixture was heated at 120 oC for 12 h. After cooling to room temperature, a large amount of precipitation was generated and filtered off. The precipitation was washed with MeOH. The residue was collected and dried under vacuum to afford compound **23a** (1.09 g, 87.2%), which was directly used for the next step without further purification. The mixture mainly contains **23-1a** and **23-3a** with a molar ratio of 1:0.6 and **23-2a** is trace. After recrystallization of the mixture in heated toluene, the pure asymmetric *Z/E*-configuration product **23-1a** was obtained.

**For 23-1a**: 1H NMR (400 MHz, CDCl3, 298 K) δ (ppm) 10.43 (s, 1H), 9.57 (s, 1H), 8.82 (d, *J* = 0.7 Hz, 1H), 8.72 (s, 1H), 7.88 (d, *J* = 8.5 Hz, 1H), 7.73 (d, *J* = 2.6 Hz, 1H), 7.70 (d, *J* = 8.6 Hz, 1H), 7.56 (s, 4H), 7.35 – 7.30 (m, 2H), 7.28 (d, *J* = 2.4 Hz, 1H), 7.18 (s, 1H), 7.07 (d, *J* = 8.6 Hz, 1H), 6.98 (d, *J* = 8.6 Hz, 1H), 4.18 (s, 3H), 4.13 (s, 3H), 1.45 (s, 10H), 1.32 (s, 9H).

HRMS (MALDI-FTICR) m/z: [M]+ calcd for C46H42O4 658.3077; found 658.3075.

*Synthesis of compound* ***24a***

First step: To a 250 mL three-necked flask equipped with a magnetic stir bar, the mixture of **23a** (560 mg, 0.85 mmol) and THF (100 mL) were added. The mixture was degassed and charged with nitrogen for three times and stirred at 0 oC (ice-water bath) for 5 min. Then, 2-mesitylmagnesium bromide (1M solution in THF, 8.5 ml, 8.5 mmol) was added to the mixture at 0 oC. After dripping completely, the mixture was warmed to room temperature for 2 h. Then, H2O was added to quench the reaction. The residual was extracted by ethyl acetate three times (50 mL × 3), and washed with saturated sodium chloride aqueous solution (50 mL × 3). The organic layer was dried with anhydrous Na2SO4. The crude product was obtained by removal of solvent and used for the next step directly.

HRMS (MALDI- FTICR) m/z: [M]+ calcd for C64H66O4 898.4955; found 898.4960.

Second step: A 100 mL three-necked flask containing the obtained crude product was under vacuum for 15 min, then 20 mL of dry DCM was added, and 0.8 mL of BF3·OEt2 was added dropwise through the syringe (turned dark immediately). The mixture was stirred for 5 h at room temperature. Then 5 mL of saturated sodium carbonate (Na2CO3) solution was added to quench the reaction. The mixture was extracted by DCM (50 mL×3), and washed with saturated sodium chloride aqueous solution (50 mL × 3). The organic layer was dried with anhydrous Na2SO4. The solvent was removed under reduced pressure, and the residue containing a small amount of DCM solvent was added to MeOH to precipitate the solid. The precipitation was filtered and the filter residue was washed with MeOH to obtain the crude product (total: 685 mg). Then, the crude was further purified by flash column chromatography using petroleum ether (b.p. 60-90 oC) and dichloromethane (5/1~2/1, v/v) as eluent to give compound **24-1a** as a yellow solid. (409 mg, 55.9% yield) and compound **24-3a** as a yellow solid (236 mg, 32.2% yield). Compound **24-2a** was not obtained under these conditions.

**For 24-1a**: 1H NMR (400 MHz, CDCl3, 298 K) δ (ppm) 8.62 (s, 1H), 8.56 (s, 1H), 7.67 (dd, *J* = 8.4, 2.8 Hz, 2H), 7.50 (s, 1H), 7.48 – 7.43 (m, 2H), 7.34 (dd, *J* = 10.8, 8.0 Hz, 1H), 7.21 (td, *J* = 6.1, 3.1 Hz, 1H), 7.05 (s, 1H), 7.01 – 6.97 (m, 4H), 6.78 – 6.67 (m, 3H), 6.61 (d, *J* = 15.0 Hz, 1H), 6.26 (s, 1H), 6.03 (d, *J* = 14.1 Hz, 1H), 4.04 (s, 3H), 4.00 (s, 3H), 2.73 (d, *J* = 14.0 Hz, 3H), 2.37 (d, *J* = 2.0 Hz, 3H), 2.28 – 2.24 (m, 9H), 1.57 (d, *J* = 13.7 Hz, 3H), 1.37 (s, 9H), 1.13 (d, *J* = 3.2 Hz, 9H).

13C NMR (101 MHz, CDCl3, 298 K) δ (ppm) 156.7, 154.3, 154.1, 152.2, 151.1, 151.0, 147.9, 147.5, 146.3, 139.5, 138.7, 138.4, 137.8, 137.4, 137.0, 136.5, 136.4, 135.9, 134.0, 133.9, 133.1, 132.8, 132.6, 132.3, 130.4, 130.0, 129.2, 129.1, 128.7, 128.2, 128.1, 127.9, 126.6, 125.7, 123.3, 121.9, 120.0, 118.2, 115.9, 113.8, 111.7, 110.0, 60.1, 59.8, 56.0, 55.8, 47.3, 47.3, 34.8, 34.7, 31.3, 30.9, 29.7, 22.1, 21.9, 21.0, 20.9, 18.9.

HRMS (MALDI-FTICR) m/z: [M]+ calcd for C64H62O2 862.4744; found 862.4747.

**For 24-3a**: 1H NMR (400 MHz, CDCl3, 298 K) δ (ppm) 9.01 (s, 1H), 8.61 (s, 1H), 7.71 (d, *J* = 7.3 Hz, 4H), 7.40 (d, *J* = 8.0 Hz, 4H), 7.00 (d, *J* = 7.5 Hz, 4H), 6.78 (d, *J* = 7.8 Hz, 2H), 6.58 (s, 2H), 6.03 (s, 2H), 4.07 (s, 6H), 2.75 (s, 6H), 2.25 (s, 6H), 1.56 (s, 6H), 1.34 (s, 18H).

13C NMR (101 MHz, CDCl3, 298 K) δ (ppm) 157.2, 154.5, 151.1, 148.5, 148.3, 146.8, 138.2, 136.7, 136.6, 136.2, 135.8, 135.8, 133.7, 133.6, 133.2, 133.2, 132.0, 130.5, 129.9, 129.1, 128.2, 125.6, 125.5, 122.2, 122.0, 121.0, 117.7, 117.6, 109.8, 60.2, 60.1, 56.0, 56.0, 34.8, 31.4, 22.0, 20.9, 19.1.

HRMS (MALDI-FTICR) m/z: [M]+ calcd for C64H62O2 862.4744; found 862.4744.

*Synthesis of compound* ***25-3a***

To a 100 mL three-necked flask equipped with a magnetic stir bar, compound **25-3a** (50 mg, 0.058 mmol) and 10 mL dry toluene were added. The mixture was degassed and charged with nitrogen for three times and stirred at 0 oC (ice-water bath) for 3 min. Then, 2,3-dichloro-5,6-dicyano-1,4-benzoquinone (DDQ) (50 mg, 0.22 mmol) in 2 mL dry toluene was added to the mixture and the mixture was stirred under N2 at room temperature for 30 min. Then, the mixture was poured into petroleum ether. A large amount of precipitation was generated and filtered off. The precipitation was washed with petroleum to obtain the crude product. The crude product was then further purified by a short silica gel column with dichloromethane to dichloromethane and methanol (1/0~20/1, v/v) to obtain a brown solid (unstable).

HRMS (MALDI-FTICR) m/z: [M]+ calcd for C64H60O2 860.4583; found 860.4587.

*Synthesis of compound* ***26-1a***

To a 100 mL three-necked flask equipped with a magnetic stir bar, compound **24-1a** (50 mg, 0.058 mmol) and 10 mL dry toluene were added. The mixture was degassed and charged with nitrogen for three times and stirred at 0 oC (ice-water bath) for 3 min. Then, 2,3-dichloro-5,6-dicyano-1,4-benzoquinone (DDQ) (50 mg, 0.22 mmol) in 2 mL dry toluene was added to the mixture and the mixture was stirred under N2 at room temperature for 2 h (The color of the mixture turned to dark green). Then, the mixture was poured into petroleum ether. A large amount of precipitation was generated and filtered off. The precipitation was washed with petroleum to obtain the crude product. The crude product was then further purified by a short silica gel column with dichloromethane to dichloromethane and methanol (1/0~20/1, v/v) to obtain a brown solid (unstable). After placing this solid under ambient conditions for 3 days, a new product of **26-1a** was obtainedas a brown solid by a silica gel column with petroleum and dichloromethane (5/1~1/3, v/v) as eluent (9 mg, 8.6% yield).

1H NMR (400 MHz, CDCl3, 298 K) δ (ppm) 8.93 (s, 1H), 8.63 (s, 1H), 8.50 (s, 1H), 7.98 (d, *J* = 8.3 Hz, 1H), 7.76 (d, *J* = 8.2 Hz, 1H), 7.67 (s, 1H), 7.54 (d, *J* = 8.1 Hz, 2H), 7.30 (d, *J* = 8.6 Hz, 2H), 7.15 (s, 2H), 6.98 (d, *J* = 5.5 Hz, 3H), 6.87 (s, 1H), 6.76 (s, 1H), 6.65 (d, *J* = 9.9 Hz, 1H), 6.60 (d, *J* = 7.7 Hz, 1H), 6.49 (d, *J* = 7.7 Hz, 1H), 3.91 (s, 3H), 2.79 (s, 1H), 2.35 (s, 3H), 2.28 (s, 3H), 2.23 (s, 3H), 1.73 (d, *J* = 11.2 Hz, 9H), 1.28 (s, 9H), 1.08 (s, 9H).

13C NMR (101 MHz, CDCl3, 298 K) δ (ppm) 182.1, 161.9, 154.9, 152.6, 151.6, 149.0, 145.4, 144.6, 144.1, 141.9, 139.9, 137.3, 137.3, 137.0, 137.0, 136.9, 135.9, 135.1, 135.0, 134.9, 134.7, 134.0, 133.1, 132.8, 132.5, 131.4, 130.5, 129.5, 129.1, 127.6, 127.5, 127.2, 126.8, 126.8, 126.6, 124.2, 120.9, 118.1, 117.7, 112.2, 55.0, 34.2, 33.6, 30.4, 29.9, 29.2, 28.7, 20.2, 19.3, 19.0, 18.8.

HRMS (MALDI-FTICR) m/z: [M+H]+ calcd for C63H59O3 863.4458; found 863.4458.

*12.2 Synthesis and characterization of* ***25-1b****,* ***25-2b****,* ***25-3b*** *and* ***26-1b.***


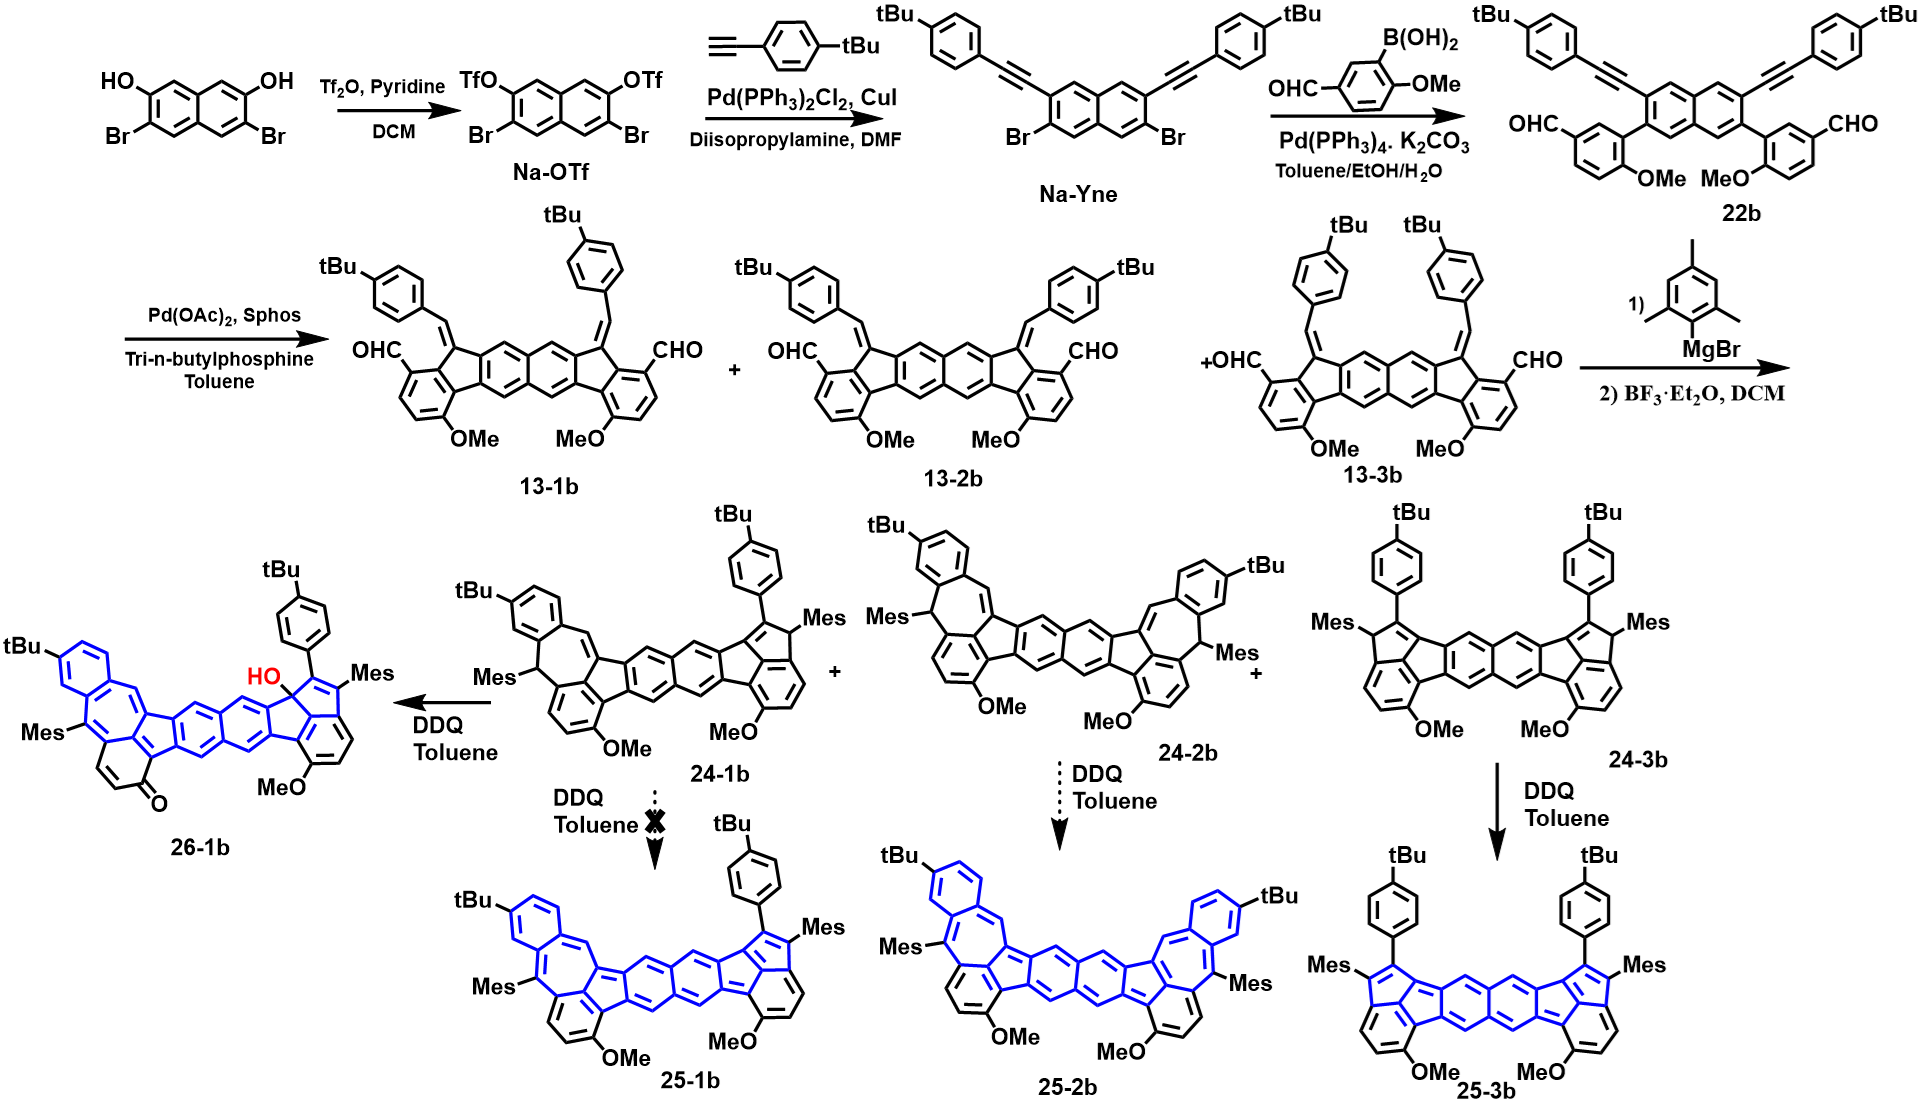


**Scheme S5** The synthetic routes of compound ***25-1b****,* ***25-2b****,* ***25-3b*** *and* ***26-1b.***

*Synthesis of compound* ***Na-OTf***

To a 250 mL three-necked flask equipped with a magnetic stir bar, compound 3,6-Dibromonaphthalene-2,7-diol (2 g, 6.33 mmol), CH2Cl2 (50 mL) and pyridine (5 mL) were added. The mixture was degassed and charged with nitrogen for three times and then cooled to 0 oC (ica-water bath) for 3 min. Then, Trifluoromethanesulfonic anhydride (5.35 g, 18.9 mmol) was added slowly to the mixture under an ice-water bath. After that, it was warmed to room temperature overnight. The reaction was quenched with hydrochloric acid solution (1 M, 50 mL), and the mixture was extracted with dichloromethane (50 mL × 3) and washed with hydrochloric acid solution (1 M, 50 mL × 3). The organic layer was dried with anhydrous Na2SO4 and concentrated under reduced pressure. The crude product was then purified by flash column chromatography using petroleum ether (b.p. 60-90 oC) and dichloromethane (4/1, v/v) as eluent to give a white solid ***Na-OTf*** (2.43 g, 66.1% yield).

1H NMR (400 MHz, CDCl3, 298 K) δ (ppm) 8.18 (s, 1H), 7.85 (s, 1H).

13C NMR (101 MHz, CDCl3 298 K) δ (ppm) δ 145.6, 132.7, 132.3, 131.2, 120.9, 120.3, 117.1, 116.3.

*Synthesis of compound* ***Na-Yne***

To a 250 mL three-necked flask equipped with a magnetic stir bar, compound ***Na-OTf*** (2 g, 3.45 mmol), Pd(PPh3)2Cl2 (242 mg, 0.345 mmol) and CuI (132 mg, 0.69 mmol). The mixture was degassed and charged with nitrogen for three times and then 1-(tert-butyl)-4-ethynylbenzene (1.09 g, 6.9 mmol), diisopropylamine (20 mL) and DMF (20 mL) were added subsequently. The mixture was stirred at room temperature overnight. The reaction was quenched with hydrochloric acid solution (1 M, 100 mL), and the mixture was extracted with dichloromethane (100 mL × 3) and washed with hydrochloric acid solution (1 M, 100 mL × 3). The organic layer was dried with anhydrous Na2SO4 and concentrated under reduced pressure. The crude product was then purified by flash column chromatography using petroleum ether (b.p. 60-90 oC) and dichloromethane (1/0~4/1, v/v) as eluent to give a light-yellow solid ***Na-Yne*** (1.654 g, 80.4% yield).

1H NMR (400 MHz, CDCl3, 298 K) δ (ppm) 8.00 (s, 2H), 7.97 (s, 2H), 7.56 (d, *J* = 6.7 Hz, 4H), 7.41 (d, *J* = 8.3 Hz, 4H), 1.34 (s, 18H).

13C NMR (101 MHz, CDCl3, 298 K) δ (ppm) 152.3, 133.2, 132.3, 132.1, 131.5, 130.2, 129.9, 125.5, 124.1, 124.0, 119.7, 94.9, 87.4, 34.9, 31.2.

HRMS (MALDI-FTICR) m/z: [M]+ calcd for C34H30Br2 596.0716; found 596.0708.

*Synthesis of compound* ***22b***

To a 250 mL three-necked flask equipped with a magnetic stir bar, compound ***Na-Yne*** (1.57 g, 2.63 mmol), 2-methoxy-5-formylphenylboronic acid (1.42 g, 7.89 mmol), K2CO3 (1.817 g, 13.17 mmol) and Pd(PPh3)4 (152 mg, 0.131 mmol) were added. The mixture was degassed and charged with nitrogen for three times. Then toluene (80 mL), ethanol (15 mL) and water (15 mL) were added to the flask. The mixture was heated at 110 oC (oil bath) overnight. After cooling to room temperature, the solvent was removed by rotary evaporation. The crude product was then purified by flash column chromatography using dichloromethane and ethyl acetate (1/0~20/1, v/v) as eluent to give a light-yellow solid **22b** (1.21 g, 65.0% yield).

1H NMR (400 MHz, CDCl3, 298 K) δ (ppm) 9.98 (s, 2H), 8.14 (s, 2H), 8.01 (d, *J* = 8.5 Hz, 2H), 7.97 (s, 2H), 7.82 (s, 2H), 7.29 (d, *J* = 7.3 Hz, 4H), 7.17-7.13 (m, 6H), 3.89 (s, 6H), 1.30 (s, 18H).

13C NMR (101 MHz, CDCl3, 298 K) δ (ppm) 190.9, 162.5, 151.6, 137.8, 133.4, 131.9, 131.7, 131.6, 131.1, 130.6, 129.6, 128.8, 125.4, 122.5, 120.1, 110.9, 92.8, 88.3, 56.1, 34.8, 31.2.

HRMS (MALDI-FTICR) m/z: [M]+ calcd for C50H44O4 708.3234; found 708.3240.

*Synthesis of compound* ***23b***

To a Pyrex tube equipped with a magnetic stir bar, compound **22b** (50 mg × 20, 1.41 mmol), Pd(OAc)2 (2.2 mg × 20, 0.19 mmol), 2-dicyclohexylphosphino-2‘,6’-dimethoxybiphenyl (Sphos, 6.8 mg × 20, 0.34 mmol), Tri-n-butylphosphine (20 μL × 20, 1.6 mmol) and toluene (2 mL × 20) were added sequentially. Then, through a freeze-pump-thaw cycle, the tube was charged with nitrogen for three times again. After rising to room temperature, the mixture was heated at 120 oC for 12 h. After cooling to room temperature, a large amount of precipitation was generated and filtered off. The precipitation was washed with MeOH. The residue was collected and dried under vacuum to afford compound **23b** (707 mg, 71.1%). The filtrate was collected and passed through a short column to obtain the product (201 mg) and the total yield is 90.8%, which was directly used for the next step without further purification. The mixture mainly contains **23-1b, 23-2b** and **23-3b** with a molar ratio of 0.56:0.1:1 (1H NMR confirmed). After recrystallization of the mixture in heated toluene, the pure *Z/Z*-configuration product **23-3b** was obtained.

**For 23-3b**: 1H NMR (300 MHz, CDCl3, 298 K) δ (ppm) 10.40 (s, 2H), 8.50 (s, 2H), 8.28 (s, 2H), 7.85 (d, *J* = 8.6 Hz, 2H), 7.75 (s, 2H), 7.54 (d, *J* = 8.2 Hz, 4H), 7.41 (d, *J* = 8.4 Hz, 4H), 7.02 (d, *J* = 8.6 Hz, 2H), 4.16 (s, 6H), 1.38 (s, 18H).

13C NMR (75 MHz, CDCl3, 298 K) δ (ppm) 190.5, 160.1, 151.7, 144.8, 136.8, 136.0, 135.4, 134.5, 134.2, 134.0, 130.9, 129.3, 128.1, 126.6, 125.4, 123.8, 122.7, 109.6, 55.9, 34.8, 31.4.

HRMS (MALDI-FTICR) m/z: [M]+ calcd for C50H44O4 708.3234; found 708.3234.

*Synthesis of compound* ***24b***

First step: To a 250 mL three-necked flask equipped with a magnetic stir bar, the mixture of **23b** (360 mg, 0.50 mmol) and THF (80 mL) were added. The mixture was degassed and charged with nitrogen for three times and stirred at 0 oC (ice-water bath) for 5 min. Then, 2-mesitylmagnesium bromide (1M solution in THF, 5.0 ml, 5.0 mmol) was added to the mixture at 0 oC. After dripping completely, the mixture was warmed to room temperature and stirred overnight. Then, H2O was added to quench the reaction. The residual was extracted by ethyl acetate three times (50 mL × 3), and washed with saturated sodium chloride aqueous solution (50 mL × 3). The organic layer was dried with anhydrous Na2SO4. The crude product was obtained by removal of solvent and used for the next step directly (430 mg crude product).

HRMS (MALDI- FTICR) m/z: [M]+ calcd for C68H68O4 948.5112; found 948.5118.

Second step: A 100 mL three-necked flask containing the obtained crude product was under vacuum for 15 min, then 40 mL of dry DCM was added, and 0.7 mL of BF3·OEt2 was added dropwise through the syringe (turned dark immediately). The mixture was stirred for 30 min at room temperature. Then, 5 mL of saturated sodium carbonate (Na2CO3) solution was added to quench the reaction. The mixture was extracted by DCM (50 mL × 3), and washed with saturated sodium chloride aqueous solution (50 mL × 3). The organic layer was dried with anhydrous Na2SO4. The solvent was removed under reduced pressure, and the residue containing a small amount DCM solvent was added to MeOH to precipitate the solid. The precipitation was filtered and the filter residue was washed with MeOH to obtain the crude product (total: 385 mg). Then, the crude was further purified by flash column chromatography using petroleum ether (b.p. 60-90 oC) and dichloromethane (5/1~2/1, v/v) as eluent to give compound **24-1b** as a yellow solid. (118 mg, 25.6% yield for two steps), compound **24-2b** as a yellow solid (15 mg, 3.3% yield for two steps), and compound **24-3b** as a yellow solid (187 mg, 40.6% yield for two steps)

**For 24-1b**: 1H NMR (400 MHz, CDCl3, 298 K) δ (ppm) 8.68 (s, 1H), 8.58 (s, 1H), 8.43 (s, 1H), 8.32 (s, 1H), 7.70-7.68 (m, 2H), 7.64 (d, *J* = 4.2 Hz, 1H), 7.48-7.46 (m, 2H), 7.40 (t, *J* = 7.9 Hz, 1H), 7.23-7.20 (m, 1H), 7.05 (s, 1H), 7.03-7.00 (m, 4H), 6.79-6.72 (m, 3H), 6.61 (s, 1H), 6.27 (d, *J* = 4.3 Hz, 1H), 6.02 (s, 1H), 4.08 (s, 3H), 4.03 (s, 3H), 2.74 (s, 3H), 2.37 (s, 3H), 2.27-2.26 (m, 9H), 1.59 (s, 3H), 1.39 (s, 9H), 1.14 (d, *J* = 1.1 Hz, 9H).

13C NMR (101 MHz, CDCl3, 298 K) δ (ppm) 157.8, 154.7, 154.6, 152.0, 150.9, 146.7, 143.4, 139.3, 138.4, 138.4, 137.8, 137.6, 137.5, 137.1, 137.1, 136.6, 136.5, 136.4, 136.0, 135.9, 134.3, 133.8, 133.2, 133.1, 132.9, 132.5, 131.0, 130.7, 130.4, 130.0, 129.3, 129.2, 129.1, 127.9, 126.3, 125.7, 124.6, 123.6, 123.3, 122.7, 119.1, 117.7, 111.6, 109.9, 59.8, 55.9, 55.4, 47.3, 34.8, 34.7, 31.3, 30.9, 22.1, 21.9, 21.0, 20.9, 18.9, 18.9.

HRMS (MALDI-FTICR) m/z: [M]+ calcd for C68H64O2 912.4900; found 912.4900.

**For 24-2b**: 1H NMR (400 MHz, CDCl3, 298 K) δ (ppm) 8.54 (s, 2H), 8.31 (s, 2H), 7.62 (s, 2H), 7.39 (d, *J* = 8.0 Hz, 2H), 7.23 (d, *J* = 7.9 Hz, 2H), 7.06 (s, 2H), 7.01 (s, 4H), 6.76 (d, *J* = 8.7 Hz, 2H), 6.72 (d, *J* = 8.7 Hz, 2H), 6.27 (s, 2H), 4.03 (s, 6H), 2.37 (s, 6H), 2.27 (s, 12H), 1.15 (s, 18H).

13C NMR (101 MHz, CDCl3, 298 K) δ (ppm) 154.6, 151.9, 139.2, 138.4, 137.8, 137.5, 137.2, 137.1, 136.8, 136.6, 135.9, 134.6, 133.2, 132.5, 130.0, 129.3, 129.0, 127.8, 127.7, 126.4, 123.2, 122.9, 118.5, 111.6, 55.4, 47.3, 34.7, 30.9, 22.1, 21.0.

HRMS (MALDI-FTICR) m/z: [M]+ calcd for C68H64O2 912.4900; found 912.4901.

**For 24-3b**: 1H NMR (400 MHz, CDCl3, 298 K) δ (ppm) 8.64 (s, 2H), 8.47 (s, 2H), 7.63 (dd, *J* = 8.6, 2.4 Hz, 4H), 7.44-7.41 (m, 4H), 7.05-7.00 (m, 4H), 6.79 (d, *J* = 7.8 Hz, 2H), 6.62 (d, *J* = 11.1 Hz, 2H), 6.03 (d, *J* = 9.8 Hz, 2H), 4.08 (s, 6H), 2.73 (d, *J* = 8.3 Hz, 6H), 2.26 (d, *J* = 5.6 Hz, 6H), 1.59 (s, 6H), 1.35 (s, 18H).

13C NMR (101 MHz, CDCl3, 298 K) δ (ppm) 157.8, 154.8, 150.9, 150.9, 146.9, 146.7, 144.1, 138.4, 136.8, 136.7, 136.6, 136.5, 136.0, 136.0, 134.1, 134.0, 133.9, 132.8, 132.8, 130.8, 130.8, 130.5, 130.4, 129.1, 127.9, 127.9, 125.7, 125.7, 125.1, 123.3, 122.9, 117.6, 109.9, 59.9, 55.9, 34.8, 31.2, 21.9, 20.9, 18.8.

HRMS (MALDI-FTICR) m/z: [M]+ calcd for C68H64O2 912.4900; found 912.4898.

*Synthesis of compound* ***25-3b***

To a 100 mL three-necked flask equipped with a magnetic stir bar, compound **24-3b** (50 mg, 0.055 mmol) and 10 mL dry toluene were added. The mixture was degassed and charged with nitrogen for three times and stirred at 0 oC (ice-water bath) for 3 min. Then, 2,3-dichloro-5,6-dicyano-1,4-benzoquinone (DDQ) (50 mg, 0.22 mmol) in 2 mL dry toluene was added to the mixture and the mixture was stirred under N2 at room temperature for 20 min. Then, the mixture was poured into petroleum ether (150 mL). A large amount of precipitation was generated and filtered off. The precipitation was washed with petroleum to obtain the crude product. The crude product was then further purified by a short silica gel column with dichloromethane and methanol (1/0~20/1, v/v) to obtain a black solid (unstable).

HRMS (MALDI-FTICR) m/z: [M+H]+ calcd for C68H62O2 910.4744; found 910.4741.

*Synthesis of compound* ***26-1b***

To a 100 mL three-necked flask equipped with a magnetic stir bar, compound **26-1b** (50 mg, 0.055 mmol) and 10 mL dry toluene were added. The mixture was degassed and charged with nitrogen for three times and stirred at 0 oC (ice-water bath) for 3 min. Then, 2,3-dichloro-5,6-dicyano-1,4-benzoquinone (DDQ) (50 mg, 0.22 mmol) in 2 mL dry toluene was added to the mixture and the mixture was stirred under N2 at room temperature for 3 h (The color of the mixture turned to dark green). Then, the mixture was poured into petroleum ether (150 mL). A large amount of precipitation was generated and filtered off. The precipitation was washed with petroleum to obtain the crude product. The crude product was then further purified by a short silica gel column with dichloromethane and methanol (1/0~20/1, v/v) to obtain a black solid (unstable). After placing this solid under ambient conditions for 3 days, a new product of **26-1b** as a brown solid was obtained by a silica gel column with petroleum and dichloromethane (5/1~1/3, v/v) as eluent (6 mg, 12.1% yield).

1H NMR (600 MHz, CDCl3, 298 K) δ (ppm) 9.09 (s, 1H), 8.79 (s, 1H), 8.67 (s, 1H), 8.47 (s, 1H), 8.40 (s, 1H), 8.17 (d, *J* = 8.3 Hz, 1H), 7.84 (dd, *J* = 8.2, 2.0 Hz, 1H), 7.73 (d, *J* = 2.0 Hz, 1H), 7.66-7.65 (m, 2H), 7.41-7.38 (m, 3H), 7.10 (d, *J* = 5.5 Hz, 2H), 6.98 (s, 1H), 6.89 (s, 1H), 6.83 (d, *J* = 10.1 Hz, 1H), 6.72 (d, *J* = 7.9 Hz, 1H), 6.62 (d, *J* = 7.8 Hz, 1H), 4.04 (s, 3H), 2.90 (s, 1H), 2.47 (s, 3H), 2.35 (d, *J* = 3.4 Hz, 6H), 1.89-1.85 (m, 9H), 1.39 (s, 9H), 1.19 (s, 9H).

13C NMR (151 MHz, CDCl3, 298 K) δ (ppm) 183.1, 162.6, 156.1, 154.5, 153.3, 149.9, 146.3, 145.1, 142.4, 141.8, 140.6, 139.0, 138.2, 138.1, 138.0, 137.2, 137.0, 136.2, 136.0, 135.9, 135.9, 135.9, 135.8, 135.7, 135.3, 134.6, 134.2, 133.8, 133.2, 132.6, 131.7, 130.9, 130.2, 129.9, 128.9, 128.7, 128.6, 128.6, 128.3, 127.5, 127.1, 125.3, 123.9, 122.2, 121.8, 120.3, 113.0, 88.1, 76.8, 56.1, 35.1, 34.7, 31.4, 30.9, 29.7, 21.2, 20.3, 19.9, 19.9, 19.9.

HRMS (MALDI-FTICR) m/z: [M+H]+ calcd for C67H61O3 913.4615; found 913.4620.

*12.3 Single crystal analysis of compound* ***25-3a*** *and* ***26-1b***


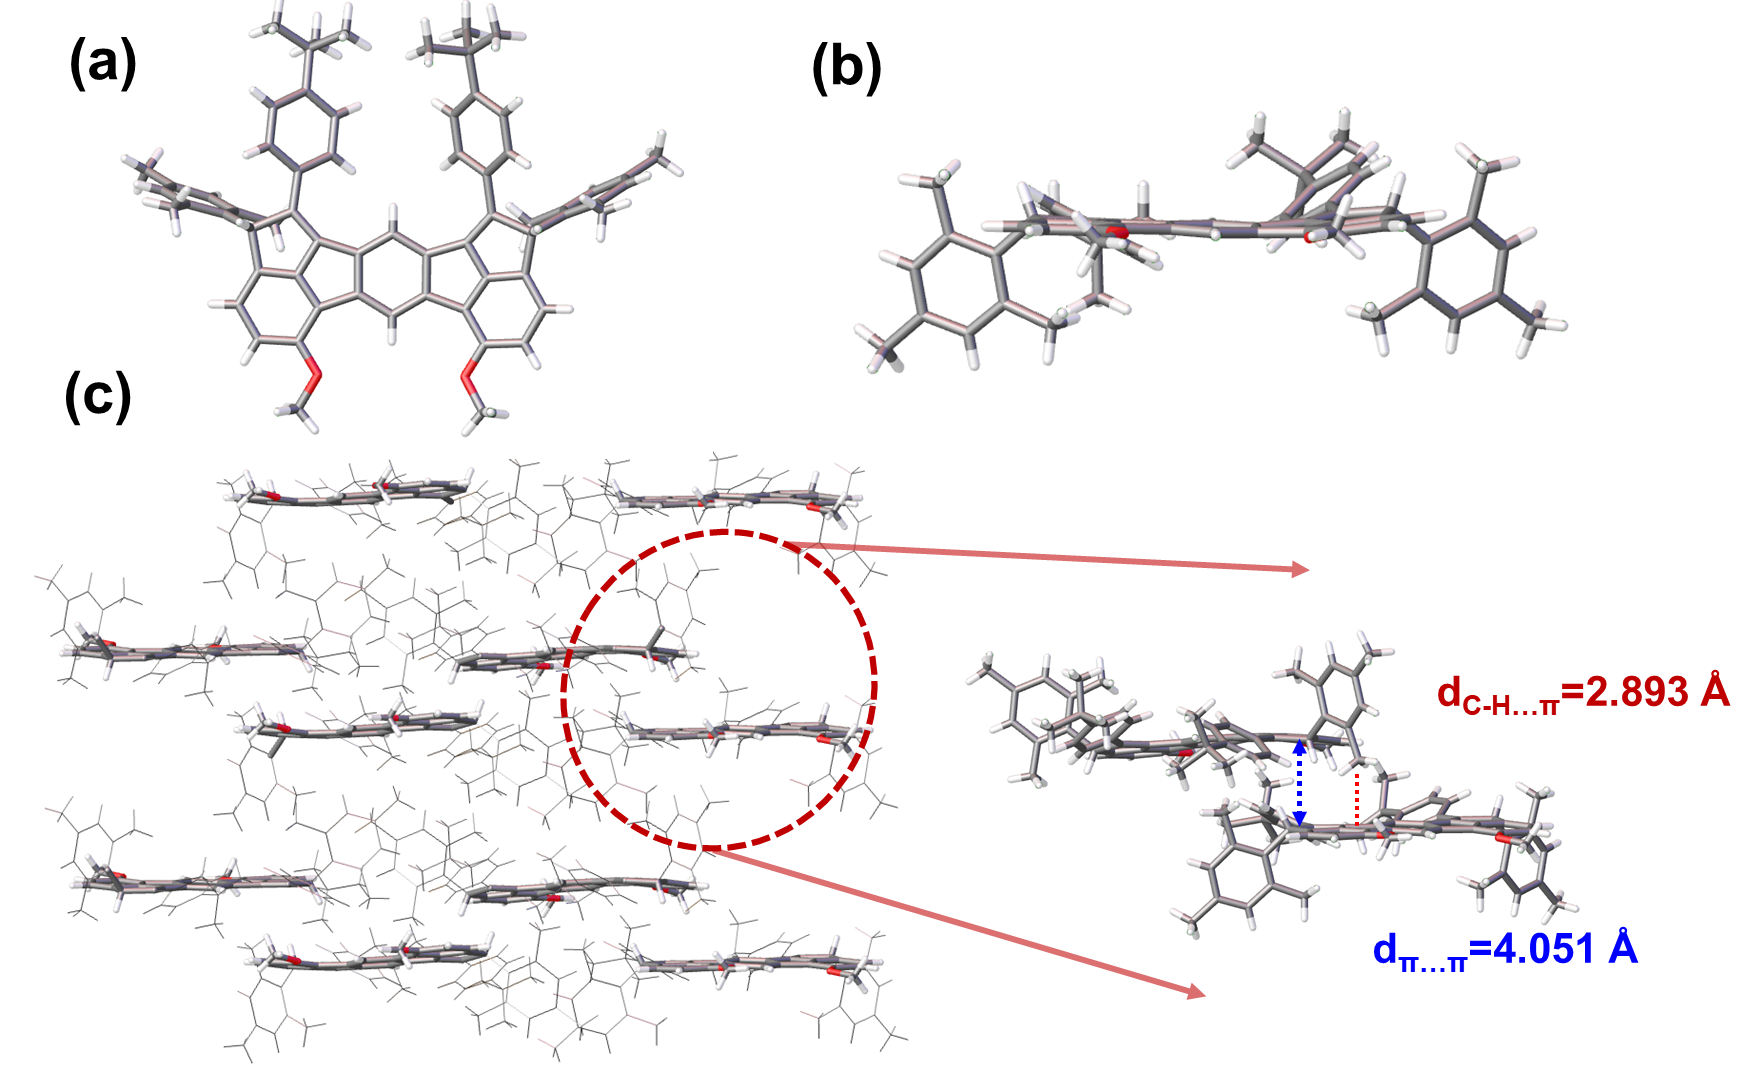


**Figure S32** X-ray single-crystal crystallographic analysis. Structure of (a) top view, (b) side view and (c) intermolecular packing mode and interaction of compound **25-3a**. Displacement ellipsoids are drawn at 50% probability level.


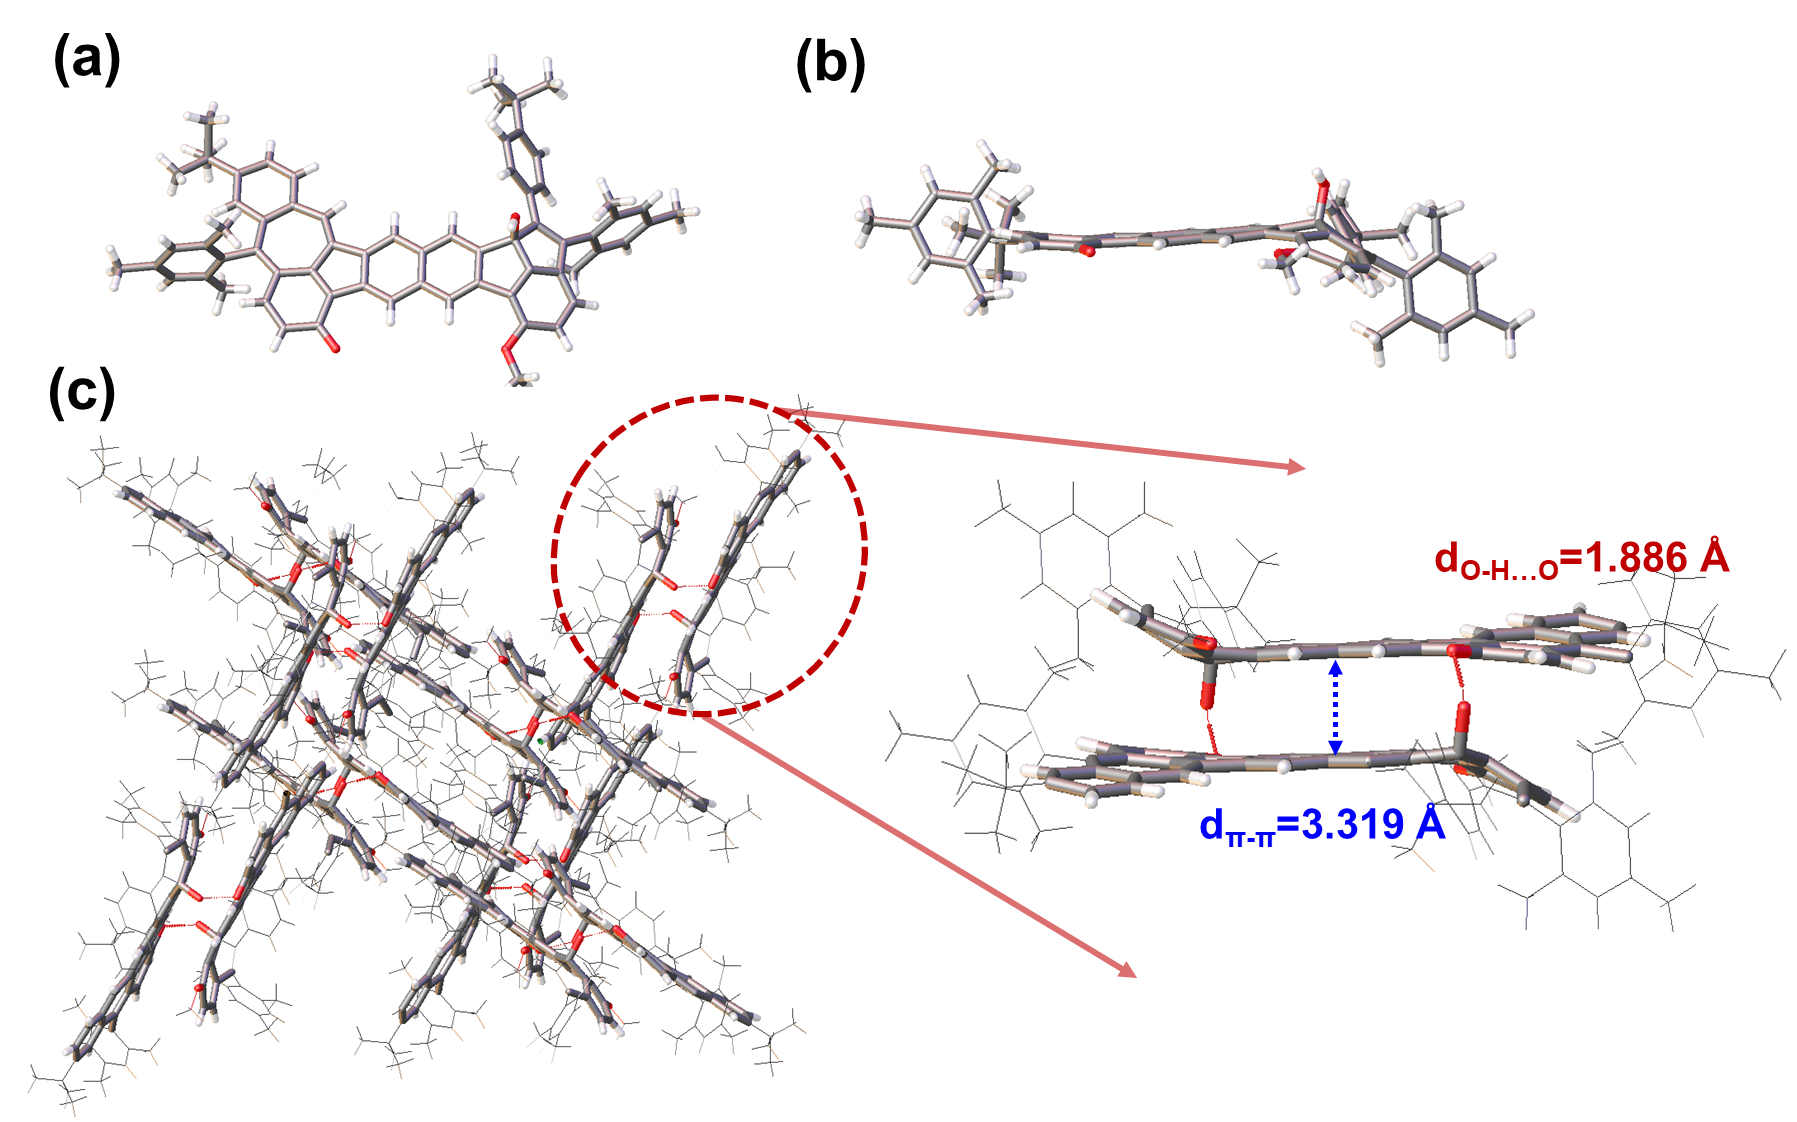


**Figure S33** X-ray single-crystal crystallographic analysis. Structure of (a) top view, (b) side view and (c) intermolecular packing mode and interaction of compound **26-1b**. Displacement ellipsoids are drawn at 50% probability level.

**Table S13** Crystallographic data of compound **25-3a**.

| Compound | **25-3a** |
| --- | --- |
| CCDC deposition NO. | 2493835 |
| Empirical formula | C130H126Cl6O4 |
| Formula weight | 1842.26 |
| Temperature/K | 170.00 (10) |
| Crystal system | monoclinic |
| Space group | P21/n |
| a/Å | 32.1086(4) |
| b/Å | 11.31470(10) |
| c/Å | 33.6187(4) |
| α/° | 90 |
| β/° | 118.247(2) |
| γ/° | 90 |
| Volume/Å3 | 10759.2(3) |
| Z | 4 |
| ρcalcg/cm3 | 1.137 |
| μ/mm‑1 | 0.566 |
| F(000) | 3929.0 |
| Crystal size/mm3 | 0.3× 0.1 × 0.05 |
| Radiation | CuKα (λ = 1.54184) |
| 2Θ range for data collection/° | 5.244 to 152.272 |
| Index ranges | -35 ≤ h ≤ 39, -10≤ k ≤ 14, -42 ≤ l ≤ 41 |
| Reflections collected | 81717 |
| Independent reflections | 21642 [Rint = 0.0394, Rsigma = 0.0375] |
| Data/restraints/parameters | 21642/0/1290 |
| Goodness-of-fit on F2 | 1.722 |
| Final R indexes [I>=2σ (I)] | R1 = 0.1232, wR2 = 0.3813 |
| Final R indexes [all data] | R1 = 0.1402, wR2 = 0.4017 |
| Largest diff. peak/hole / e Å-3 | 2.74/-1.47 |

**Table S14** Crystallographic data of compound **26-1b**.

| Compound | **26-1b** |
| --- | --- |
| CCDC deposition NO. | 2478871 |
| Empirical formula | C67H60O3 |
| Formula weight | 1071.06 |
| Temperature/K | 109 (14) |
| Crystal system | monoclinic |
| Space group | P21/c |
| a/Å | 18.7257(9) |
| b/Å | 11.9599(5) |
| c/Å | 29.4188(8) |
| α/° | 90 |
| β/° | 106.581(4) |
| γ/° | 90 |
| Volume/Å3 | 6314.6(5) |
| Z | 4 |
| ρcalcg/cm3 | 1.127 |
| μ/mm‑1 | 0.690 |
| F(000) | 2261.0 |
| Crystal size/mm3 | 0.2× 0.05 × 0.02 |
| Radiation | CuKα (λ = 1.54184) |
| 2Θ range for data collection/° | 4.924 to 152.304 |
| Index ranges | -23 ≤ h ≤ 23, -14≤ k ≤ 14, -24 ≤ l ≤ 36 |
| Reflections collected | 55155 |
| Independent reflections | 12716 [Rint = 0.00744, Rsigma = 0.0533] |
| Data/restraints/parameters | 12716/0/646 |
| Goodness-of-fit on F2 | 3.272 |
| Final R indexes [I>=2σ (I)] | R1 = 0.3507, wR2 = 0.6993 |
| Final R indexes [all data] | R1 = 0.4008, wR2 = 0.7300 |
| Largest diff. peak/hole / e Å-3 | 6.01/-0.99 |

*12.4 Calculations of compounds* ***25*** *and* ***26***

**Table S15** Calculated Δ*E*st value based on (U)B3LYP-D3(BJ)/6-31G** level

| **Compounds** | ***E*s** (Hartree) | ***E*s** (Hartree) | ***E*t** (Hartree) | **Δ*E*st** |
| --- | --- | --- | --- | --- |
| (Close-Shell) | (Open-Shell) |  | (kcal mol-1) |
| **25-1a** | -2625.7998 | -2625.81105 | -2625.812056 | 7.70644 |
| **25-2a** | -2625.8253 | -2625.84618 | -2625.846397 | 13.2474 |
| **25-3a** | -2625.7736 | -2625.78617 | -2625.788926 | 9.60842 |
| **26-1a** | -2661.7368 |  | -2661.684975 |  |
| **25-1b** | -2779.463 | -2779.47739 | -2779.477772 | 9.25388 |
| **25-2b** | -2779.4877 | -2779.51173 | -2779.511838 | 15.1161 |
| **25-3b** | -2779.441 | -2779.45231 | -2779.452937 | 7.50752 |
| **26-1b** | -2815.3995 |  | -2815.350041 |  |


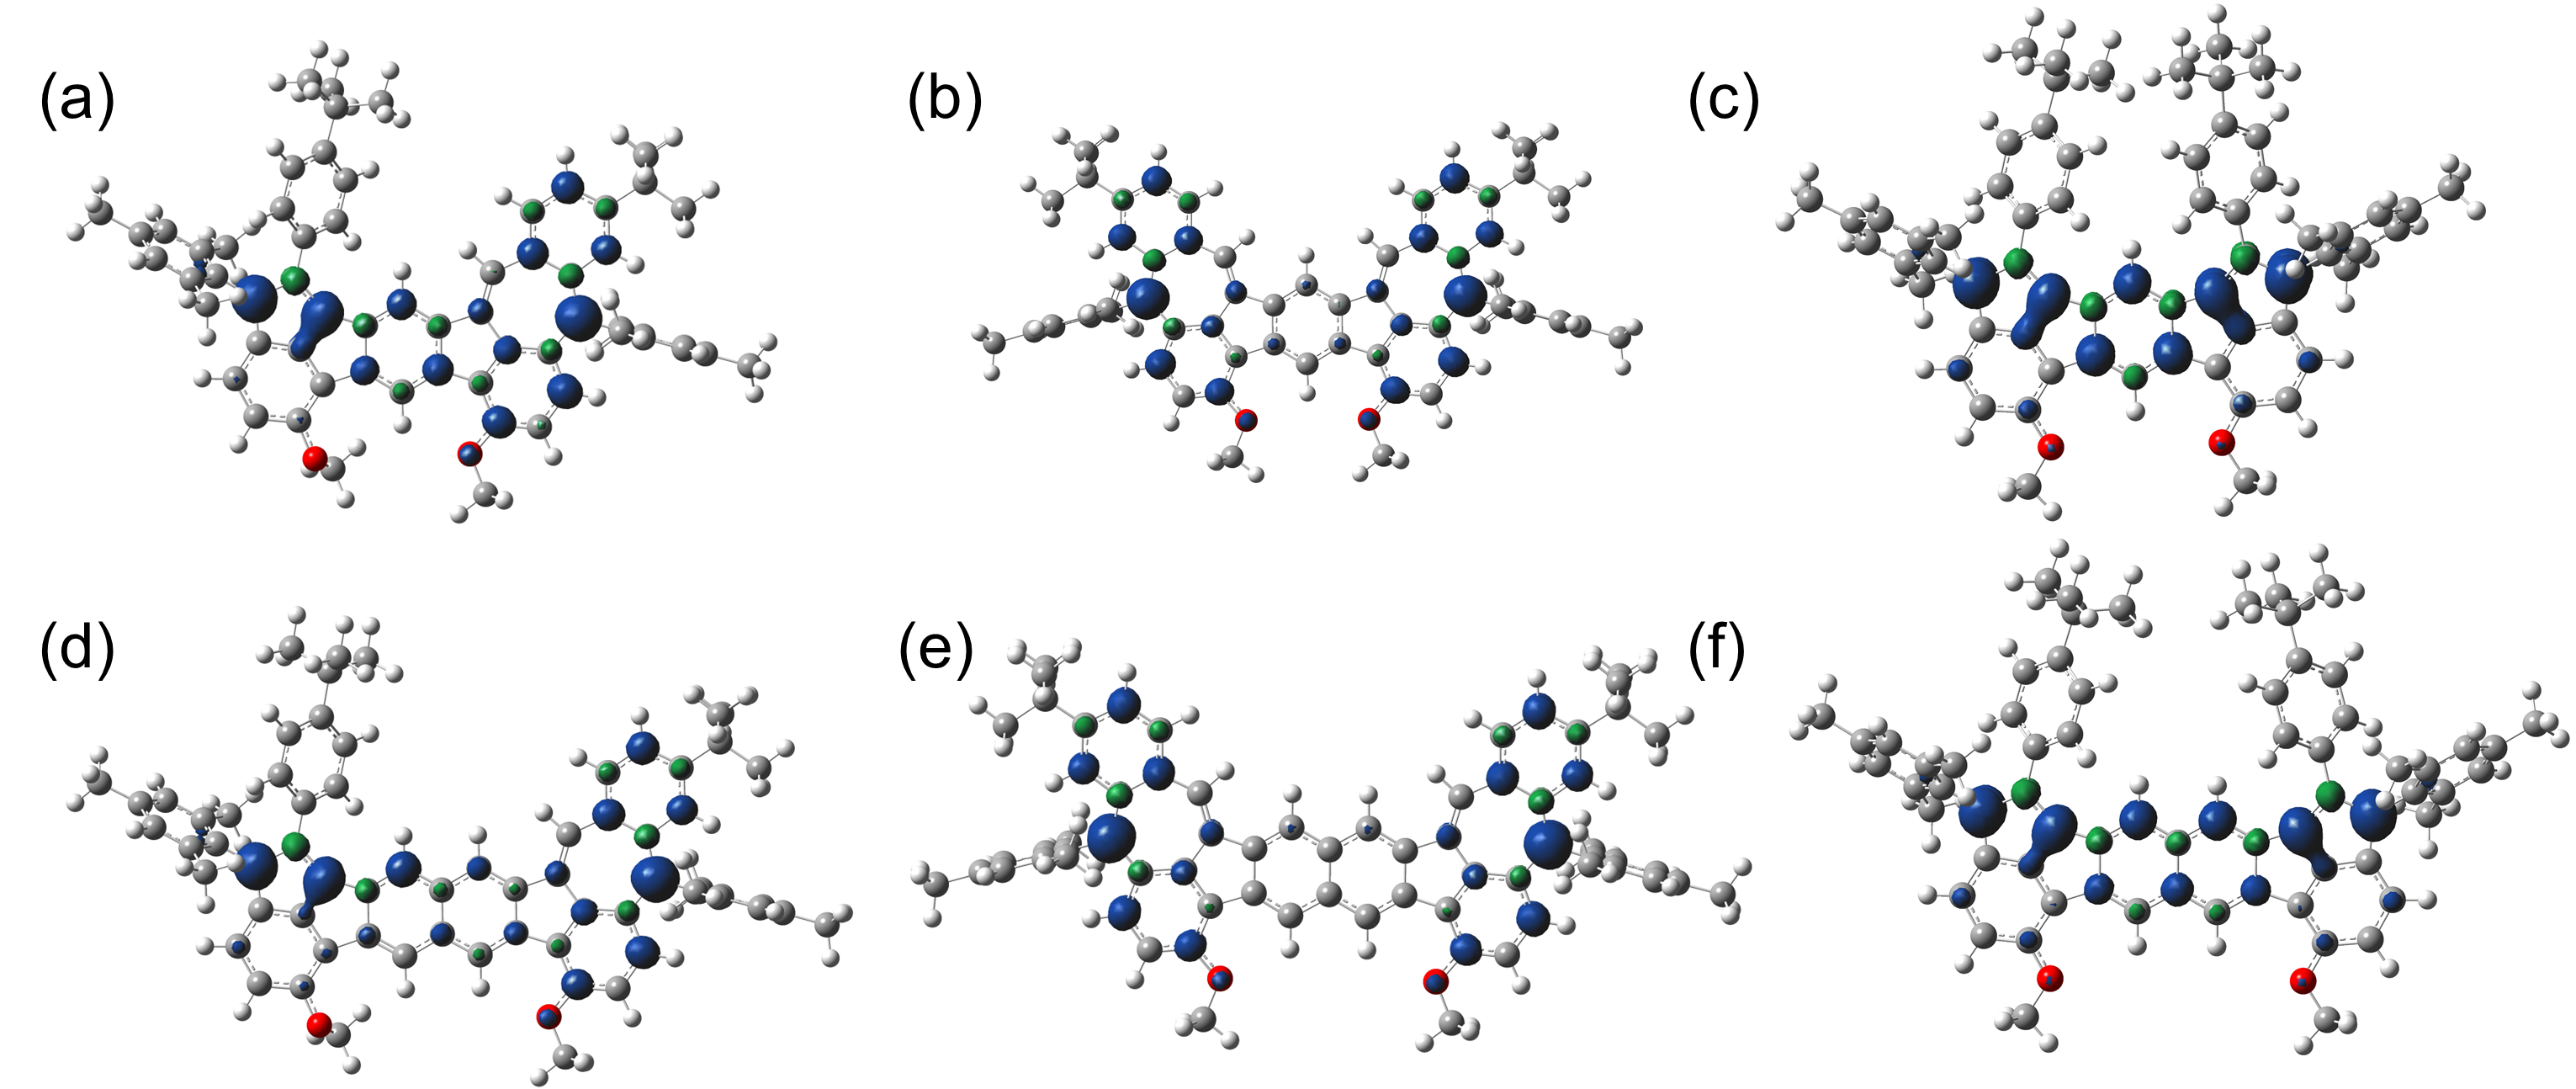


**Figure S34** Spin density surfaces calculated by DFT U**B3LYP-D3(BJ)/6-31G(d,p)** in the triplet state of (a) **25-1a**, (b) **25-2a**, (c) **25-3a**, (d) **25-1b**, (e) **25-2b** and (f) **25-3b**. The isovalue is 0.005.


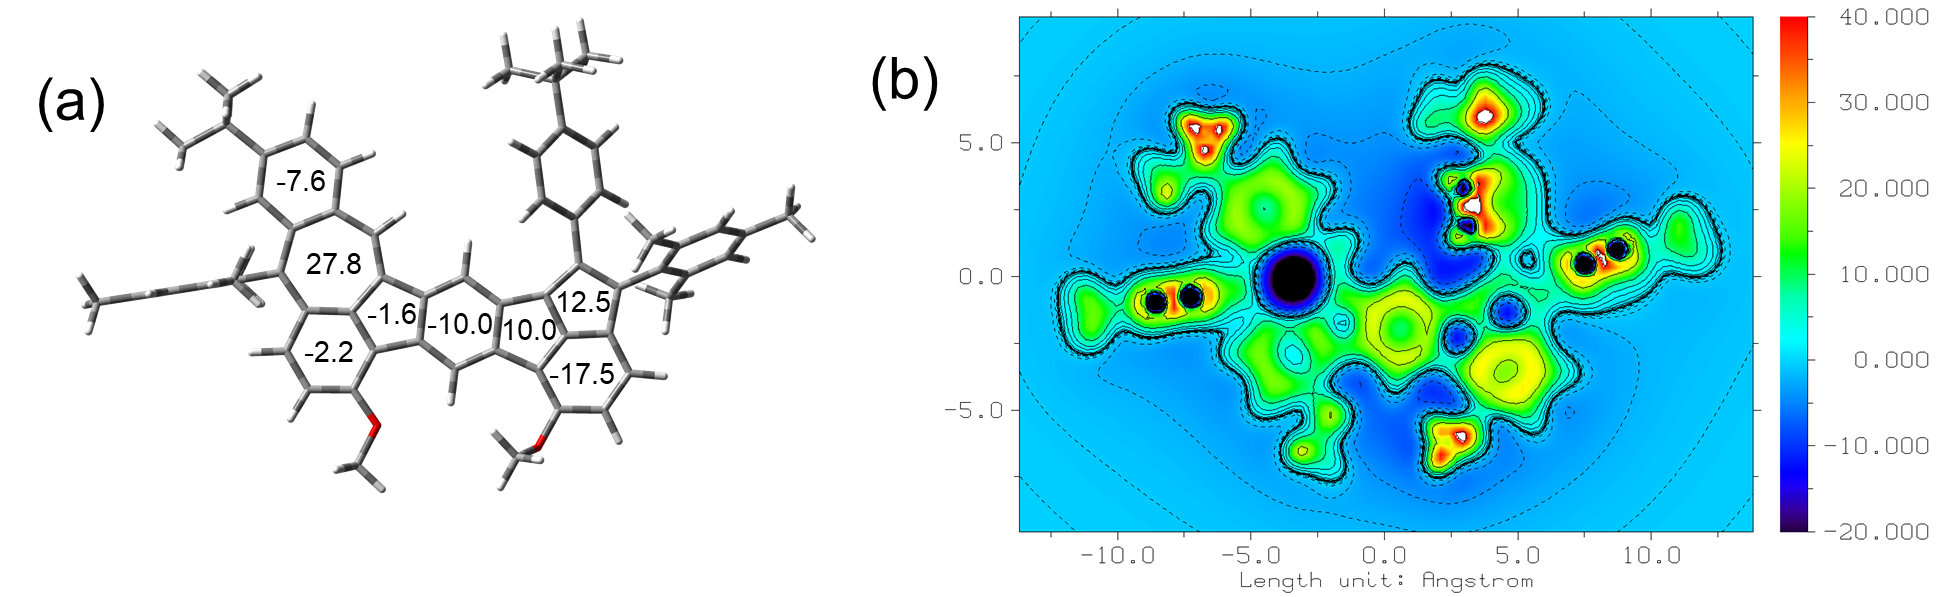


**Figure S35** The aromaticity calculation of compound **25-1a**. (a) **Nucleus-independent chemical shift (NICS) values and** (b) the isotropic chemical shielding surface (ICSS) maps based on DFT U**B3LYP/6-31G(d,p) level.**


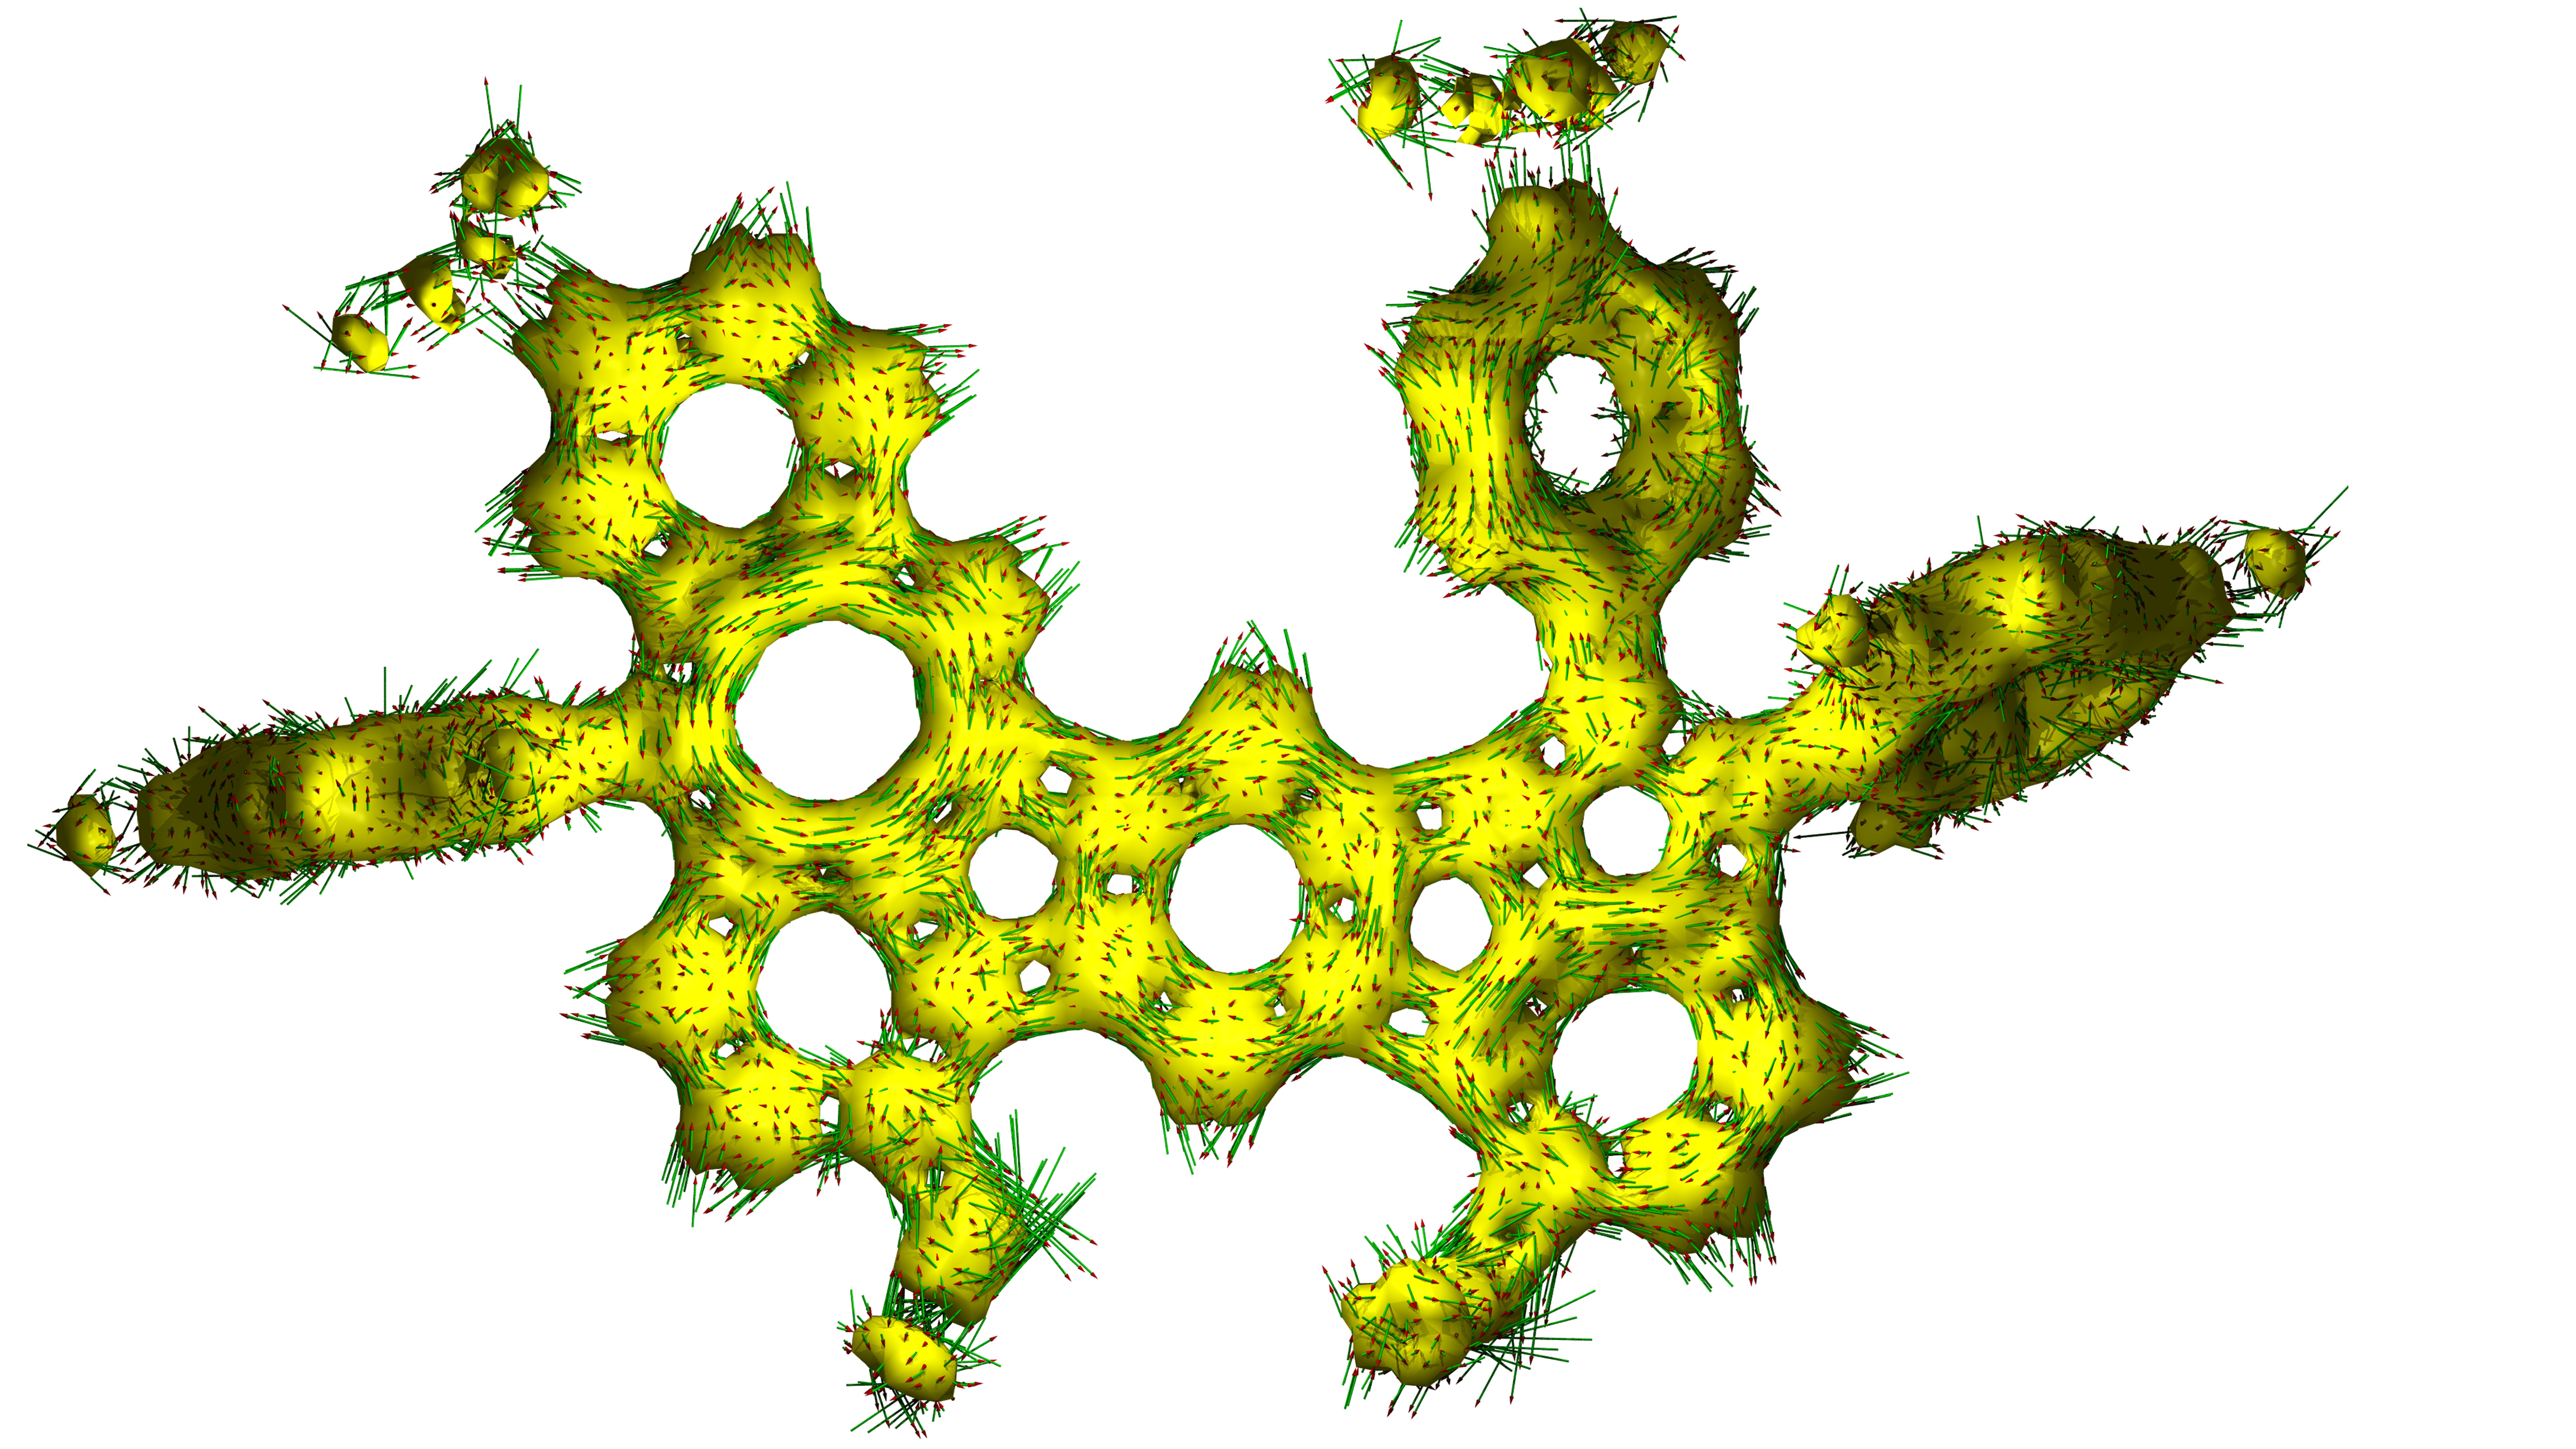


**Figure S36** The aromaticity calculation of compound **25-1a**. **The calculated** anisotropy of the induced current density (ACID) plots based on DFT U**B3LYP/6-31G(d,p) level.**


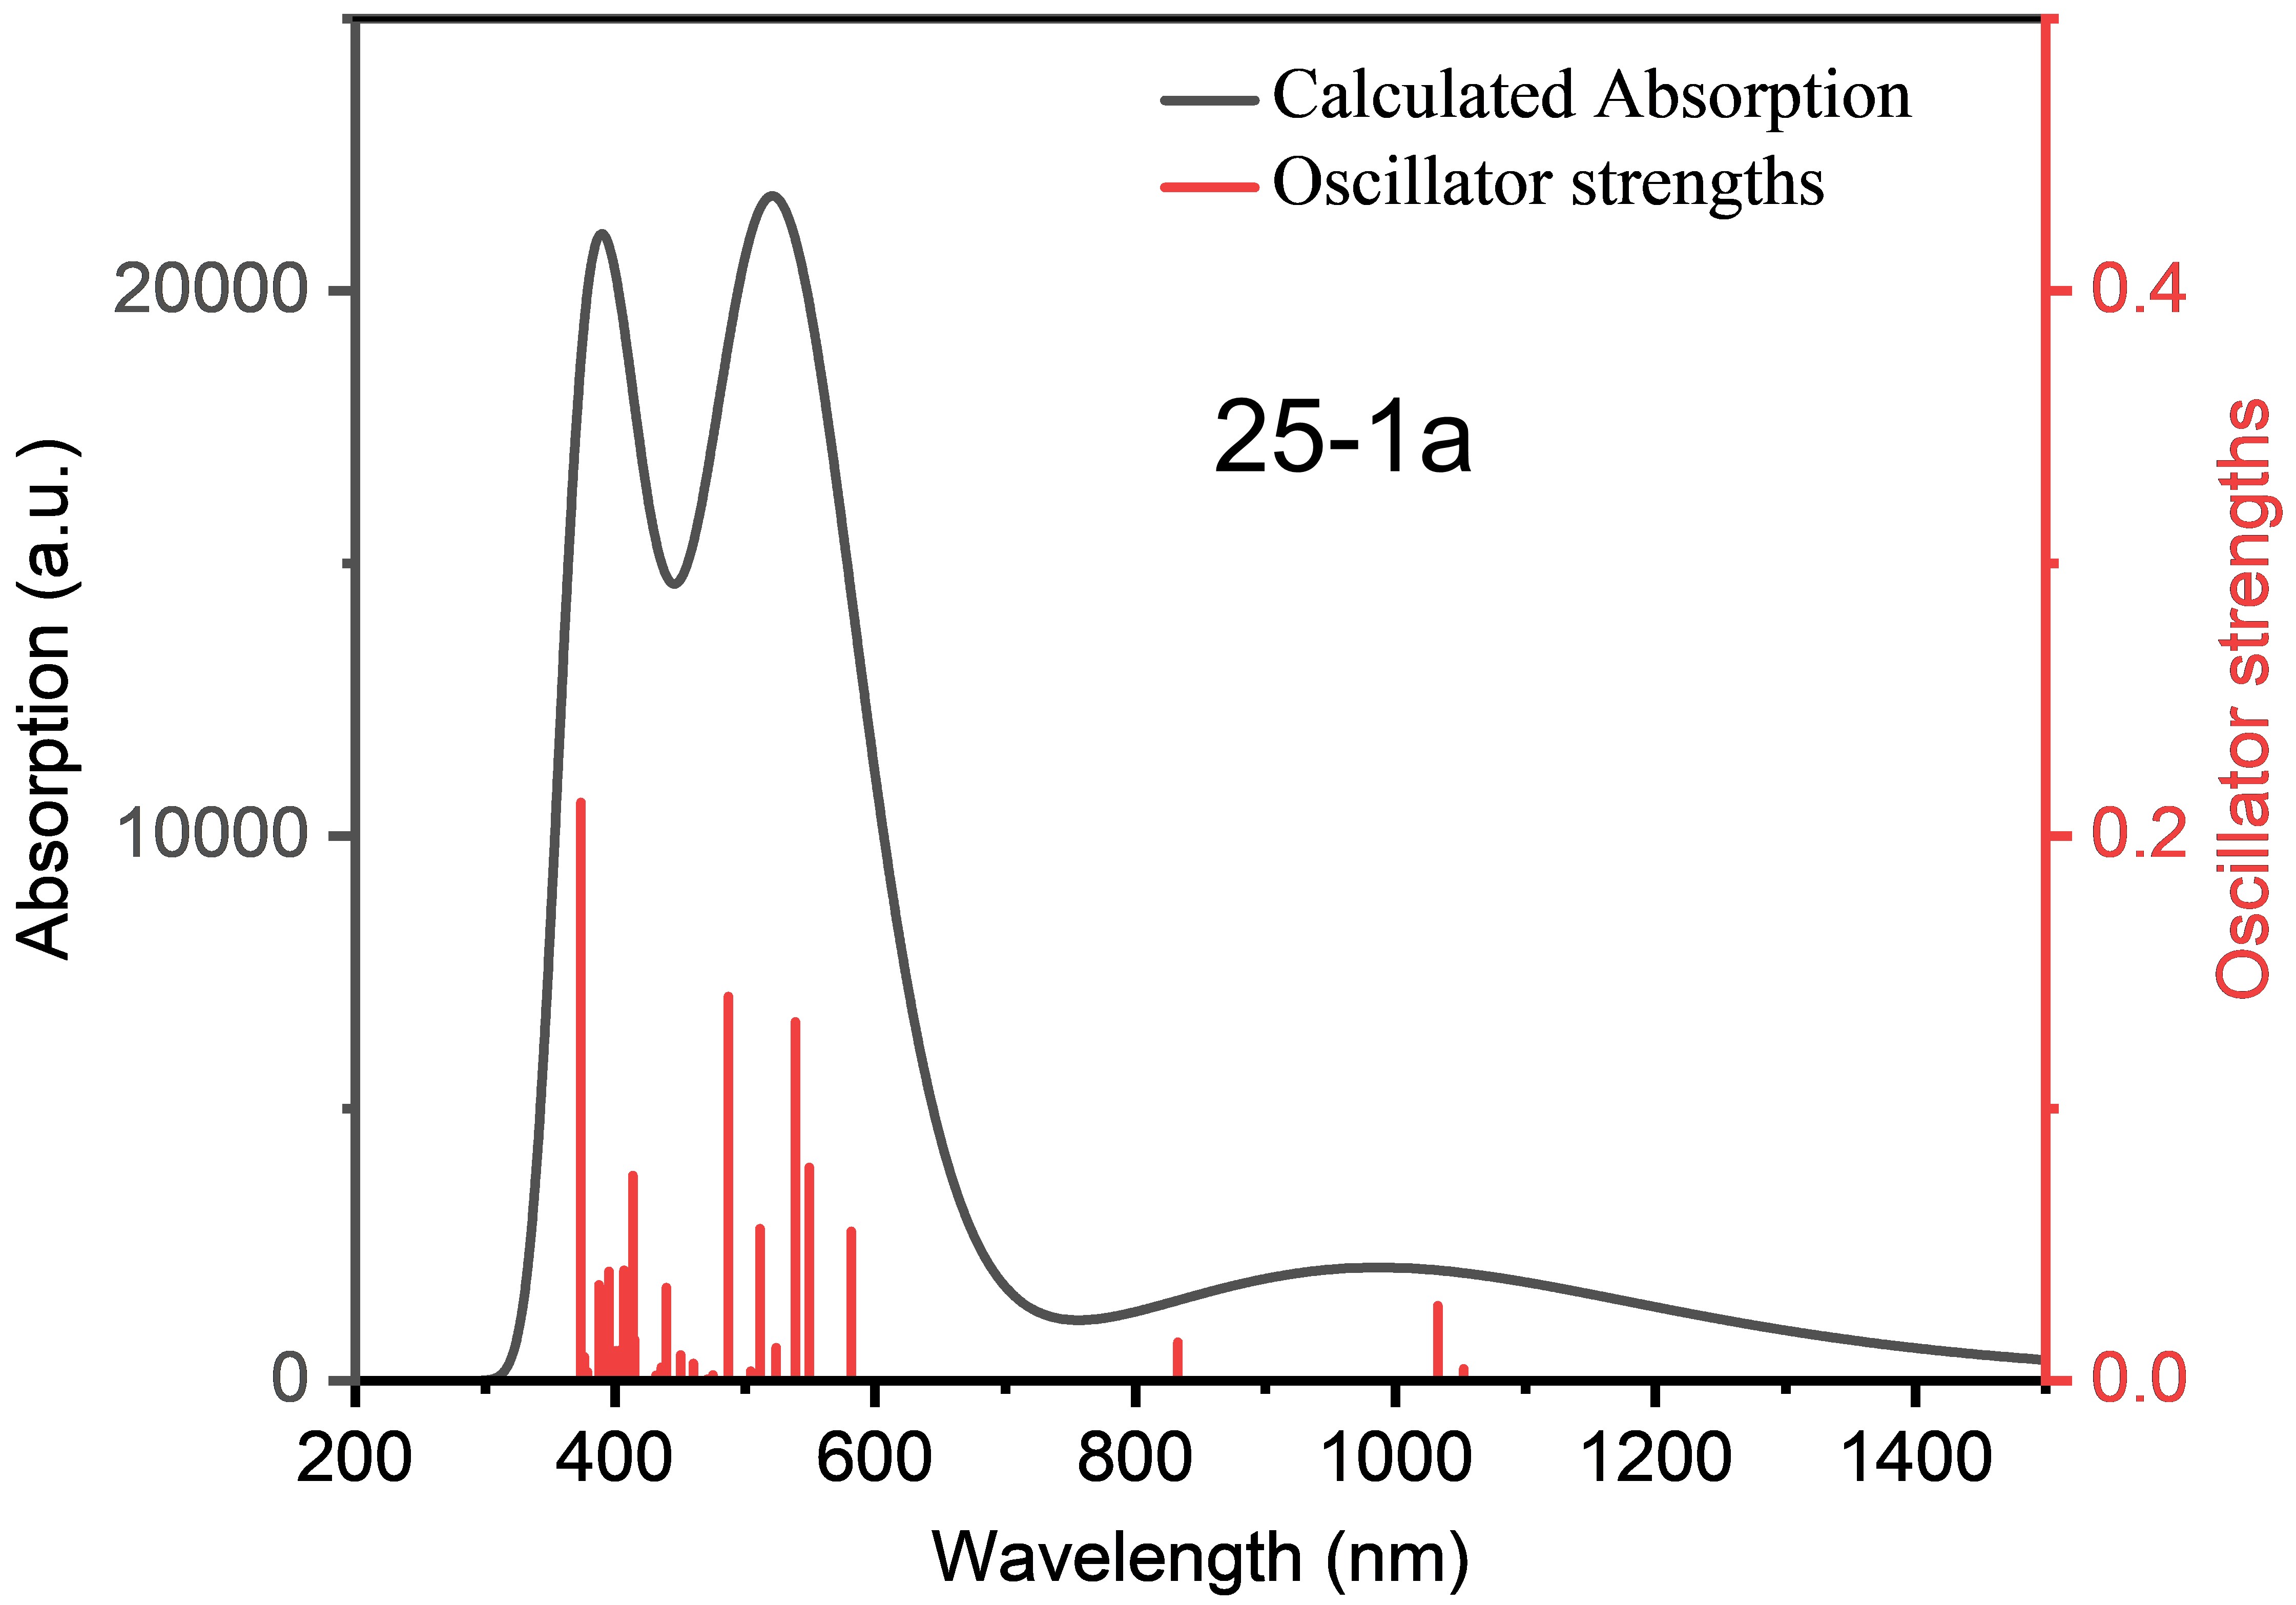


**Figure S37** Calculated UV-vis absorption spectra of the **25-1a** (triple state)

**Table S16** Excitation energies, oscillator strengths and orbital contribution of the S0 → Sn excitations of **25-1a** calculated at the TD-UB3LYP-D3(BJ)/6-31G(d,p) level of theory.

| transition | energy [eV] | energy [nm] | oscillator  strength | orbital contribution | |
| --- | --- | --- | --- | --- | --- |
| S0 → S1 | 1.1781 | 1052.41 | 0.00440 | αH → αL | 89.5% |
| S0 → S2 | 1.2008 | 1032.51 | 0.02760 | βH → βL  αH → αL | 84.9%  5.0% |
| S0 → S3 | 1.4888 | 832.78 | 0.01410 | βH-1 → βL  βH → βL | 89.3%  5.3% |
| S0 → S4 | 2.1323 | 581.46 | 0.05490 | βH-2 → βL  αH-1 → αL | 57.5%  25.2% |
| S0 → S5 | 2.2580 | 549.09 | 0.07830 | αH-1 → αL  βH-2 → βL  βH-1 → βL+1 | 52.2%  15.4%  14.2% |
| S0 → S6 | 2.3017 | 538.66 | 0.13180 | βH-1 → βL+1  βH → βL+1  βH-2 → βL  αH-3 → αL  αH-1 → αL  βH-1 → βL+2  αH → αL+1 | 20.5%  15.1%  14.9%  12.5%  9.9%  7.2%  6.4% |
| S0 → S7 | 2.3675 | 523.69 | 0.01220 | βH → βL+1  βH-3 → βL  βH-1 → βL+2  αH-3 → αL  αH → αL+1  αH → αL+2  βH-2 → βL+1 | 21.3%  19.1%  11.8%  9.2%  8.9%  6.9%  5.8% |
| S0 → S8 | 2.4253 | 511.21 | 0.05590 | βH-3 → βL  βH-1 → βL+1  βH → βL+1 | 63.4%  9.1%  7.7% |
| S0 → S9 | 2.4597 | 504.06 | 0.00350 | αH → αL+1  βH → βL+1  βH-1 → βL+1  αH → αL+2  βH → βL+2 | 31.1%  21.1%  8.5%  7.6%  7.2% |
| S0 → S10 | 2.5457 | 487.03 | 0.14110 | βH-1 → βL+1  αH → αL+1  βH-1 → βL+2  αH-3 → αL | 29.5%  29.3%  16.1%  6.0% |


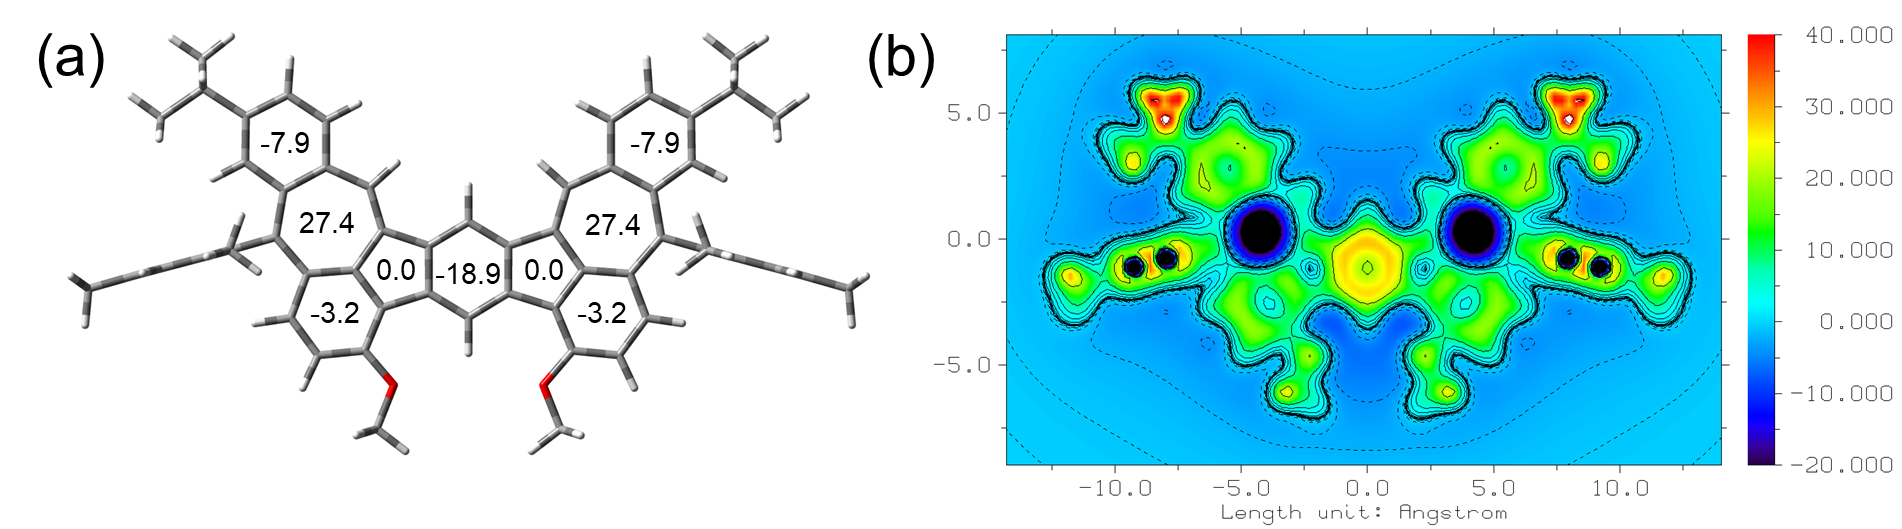


**Figure S38** The aromaticity calculation of compound **25-2a**. (a) **Nucleus-independent chemical shift (NICS) values** and (b) the isotropic chemical shielding surface (ICSS) maps based on DFT U**B3LYP/6-31G(d,p) level.**


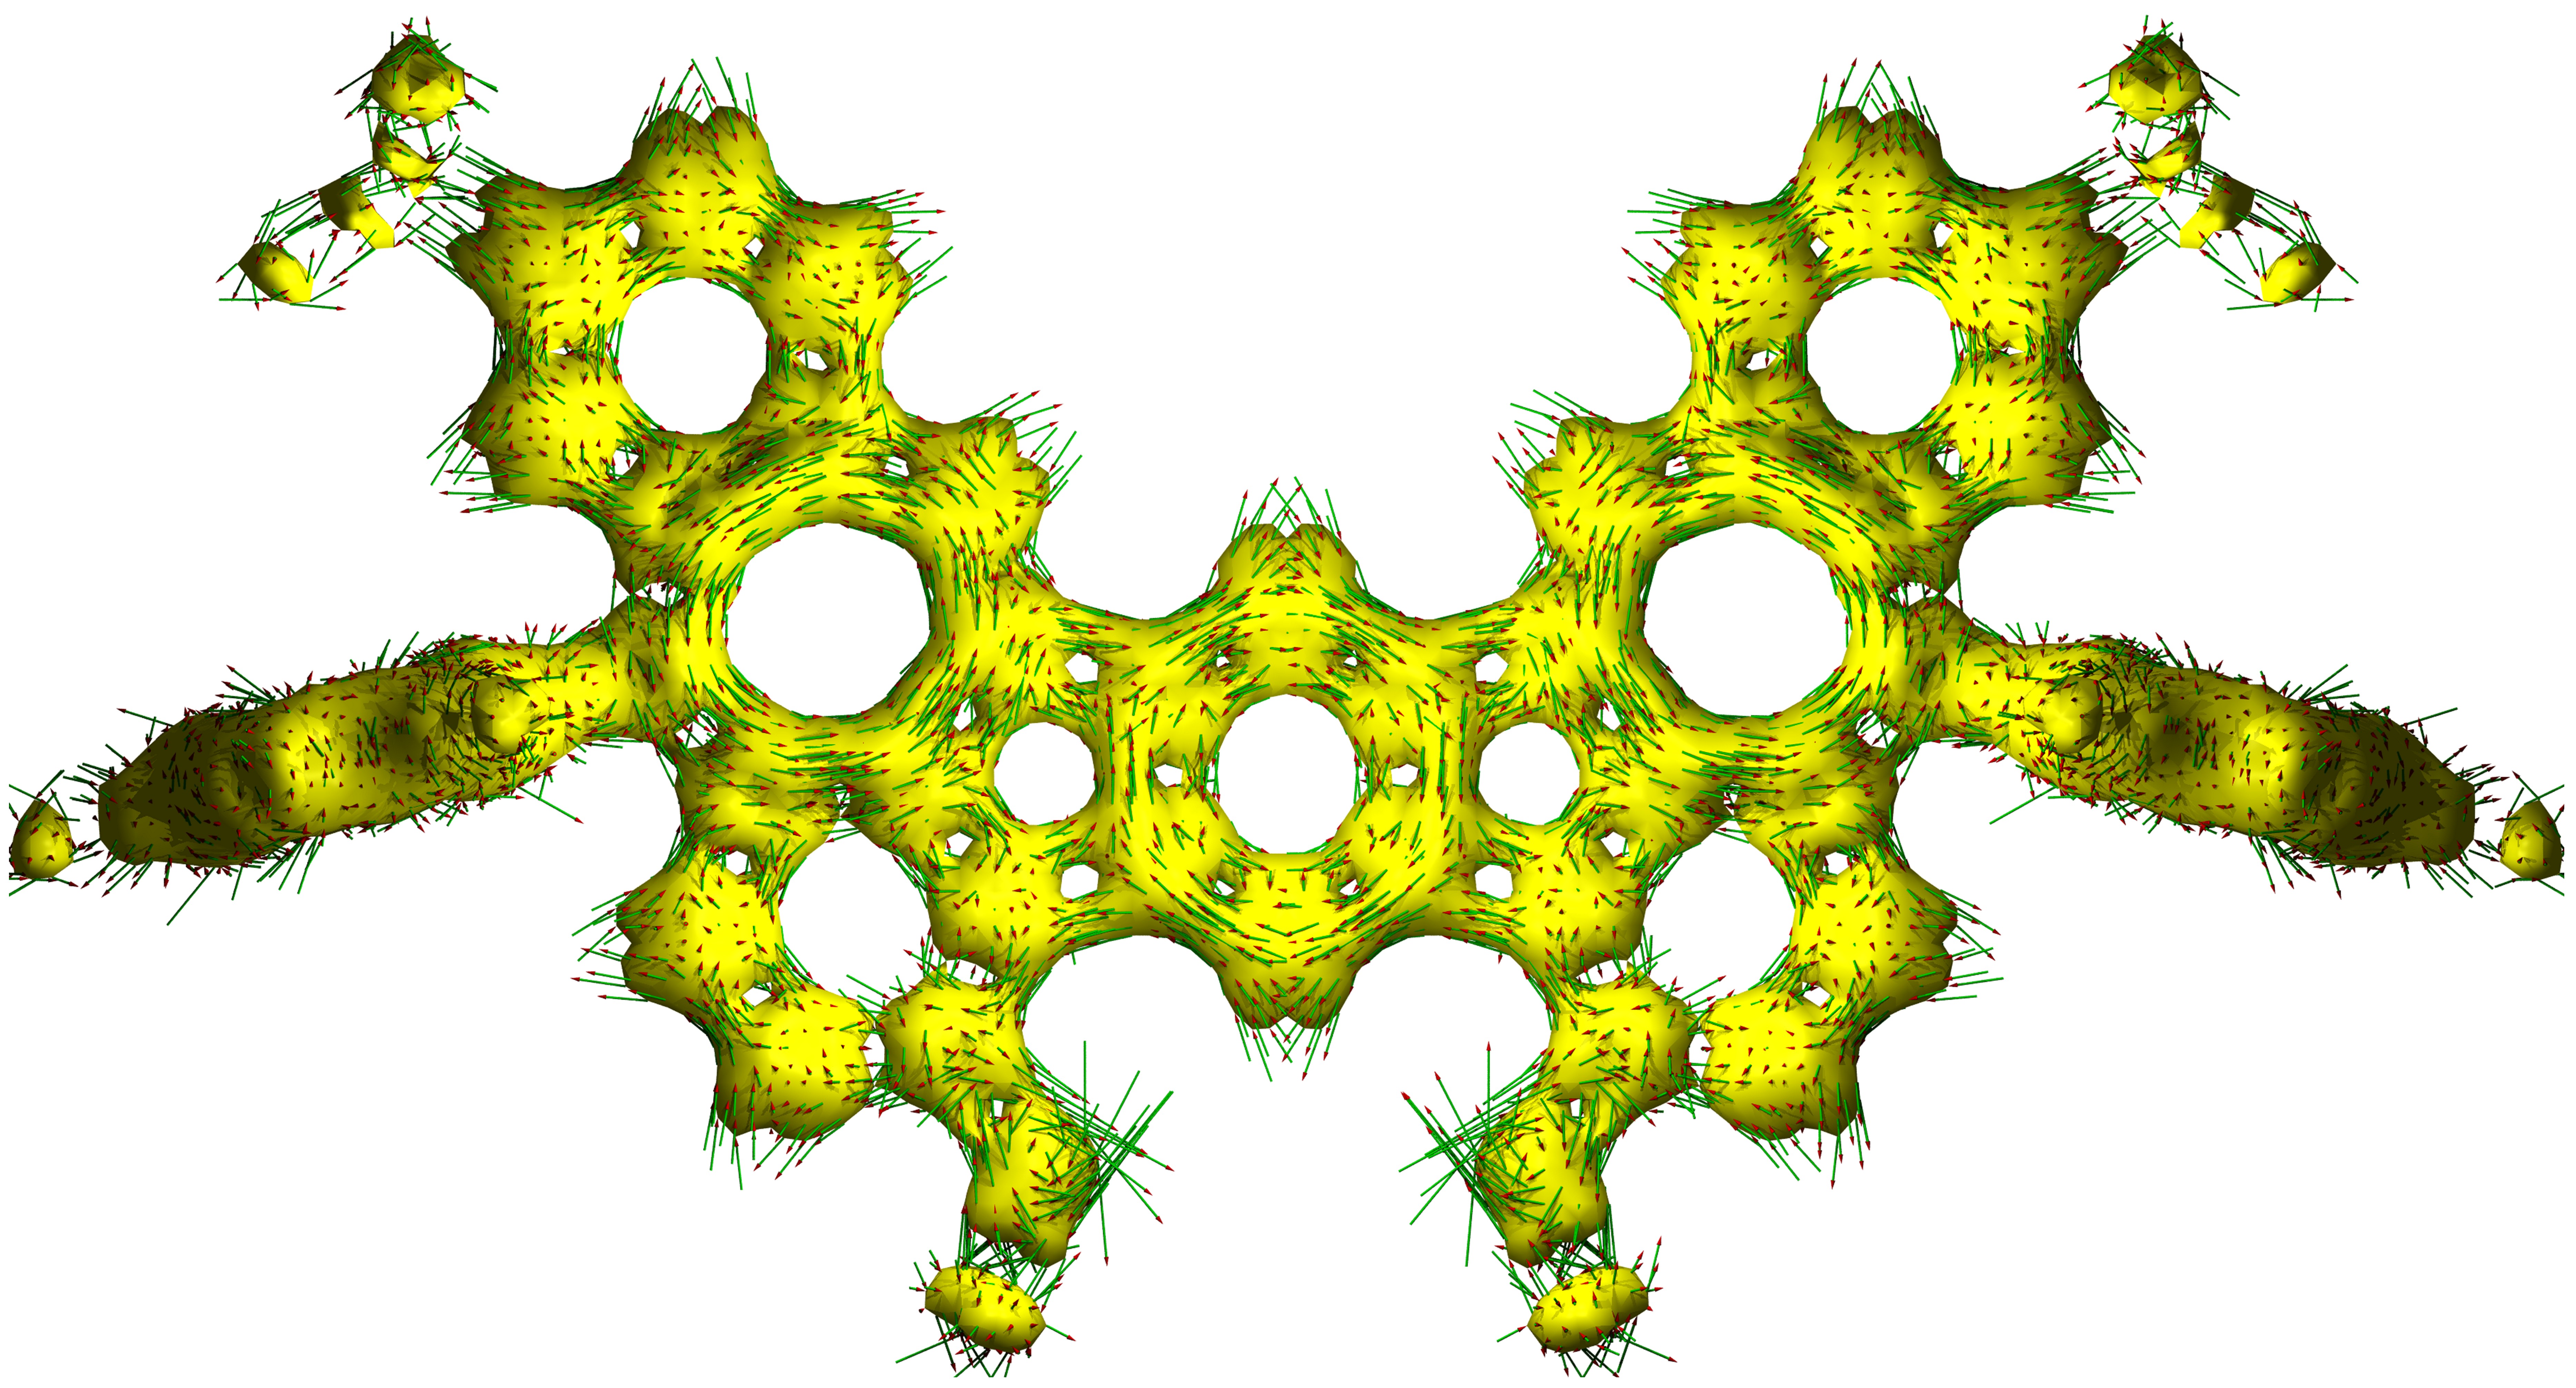


**Figure S39** The aromaticity calculation of compound **25-2a**. **The calculated** anisotropy of the induced current density (ACID) plots based on DFT U**B3LYP/6-31G(d,p) level.**


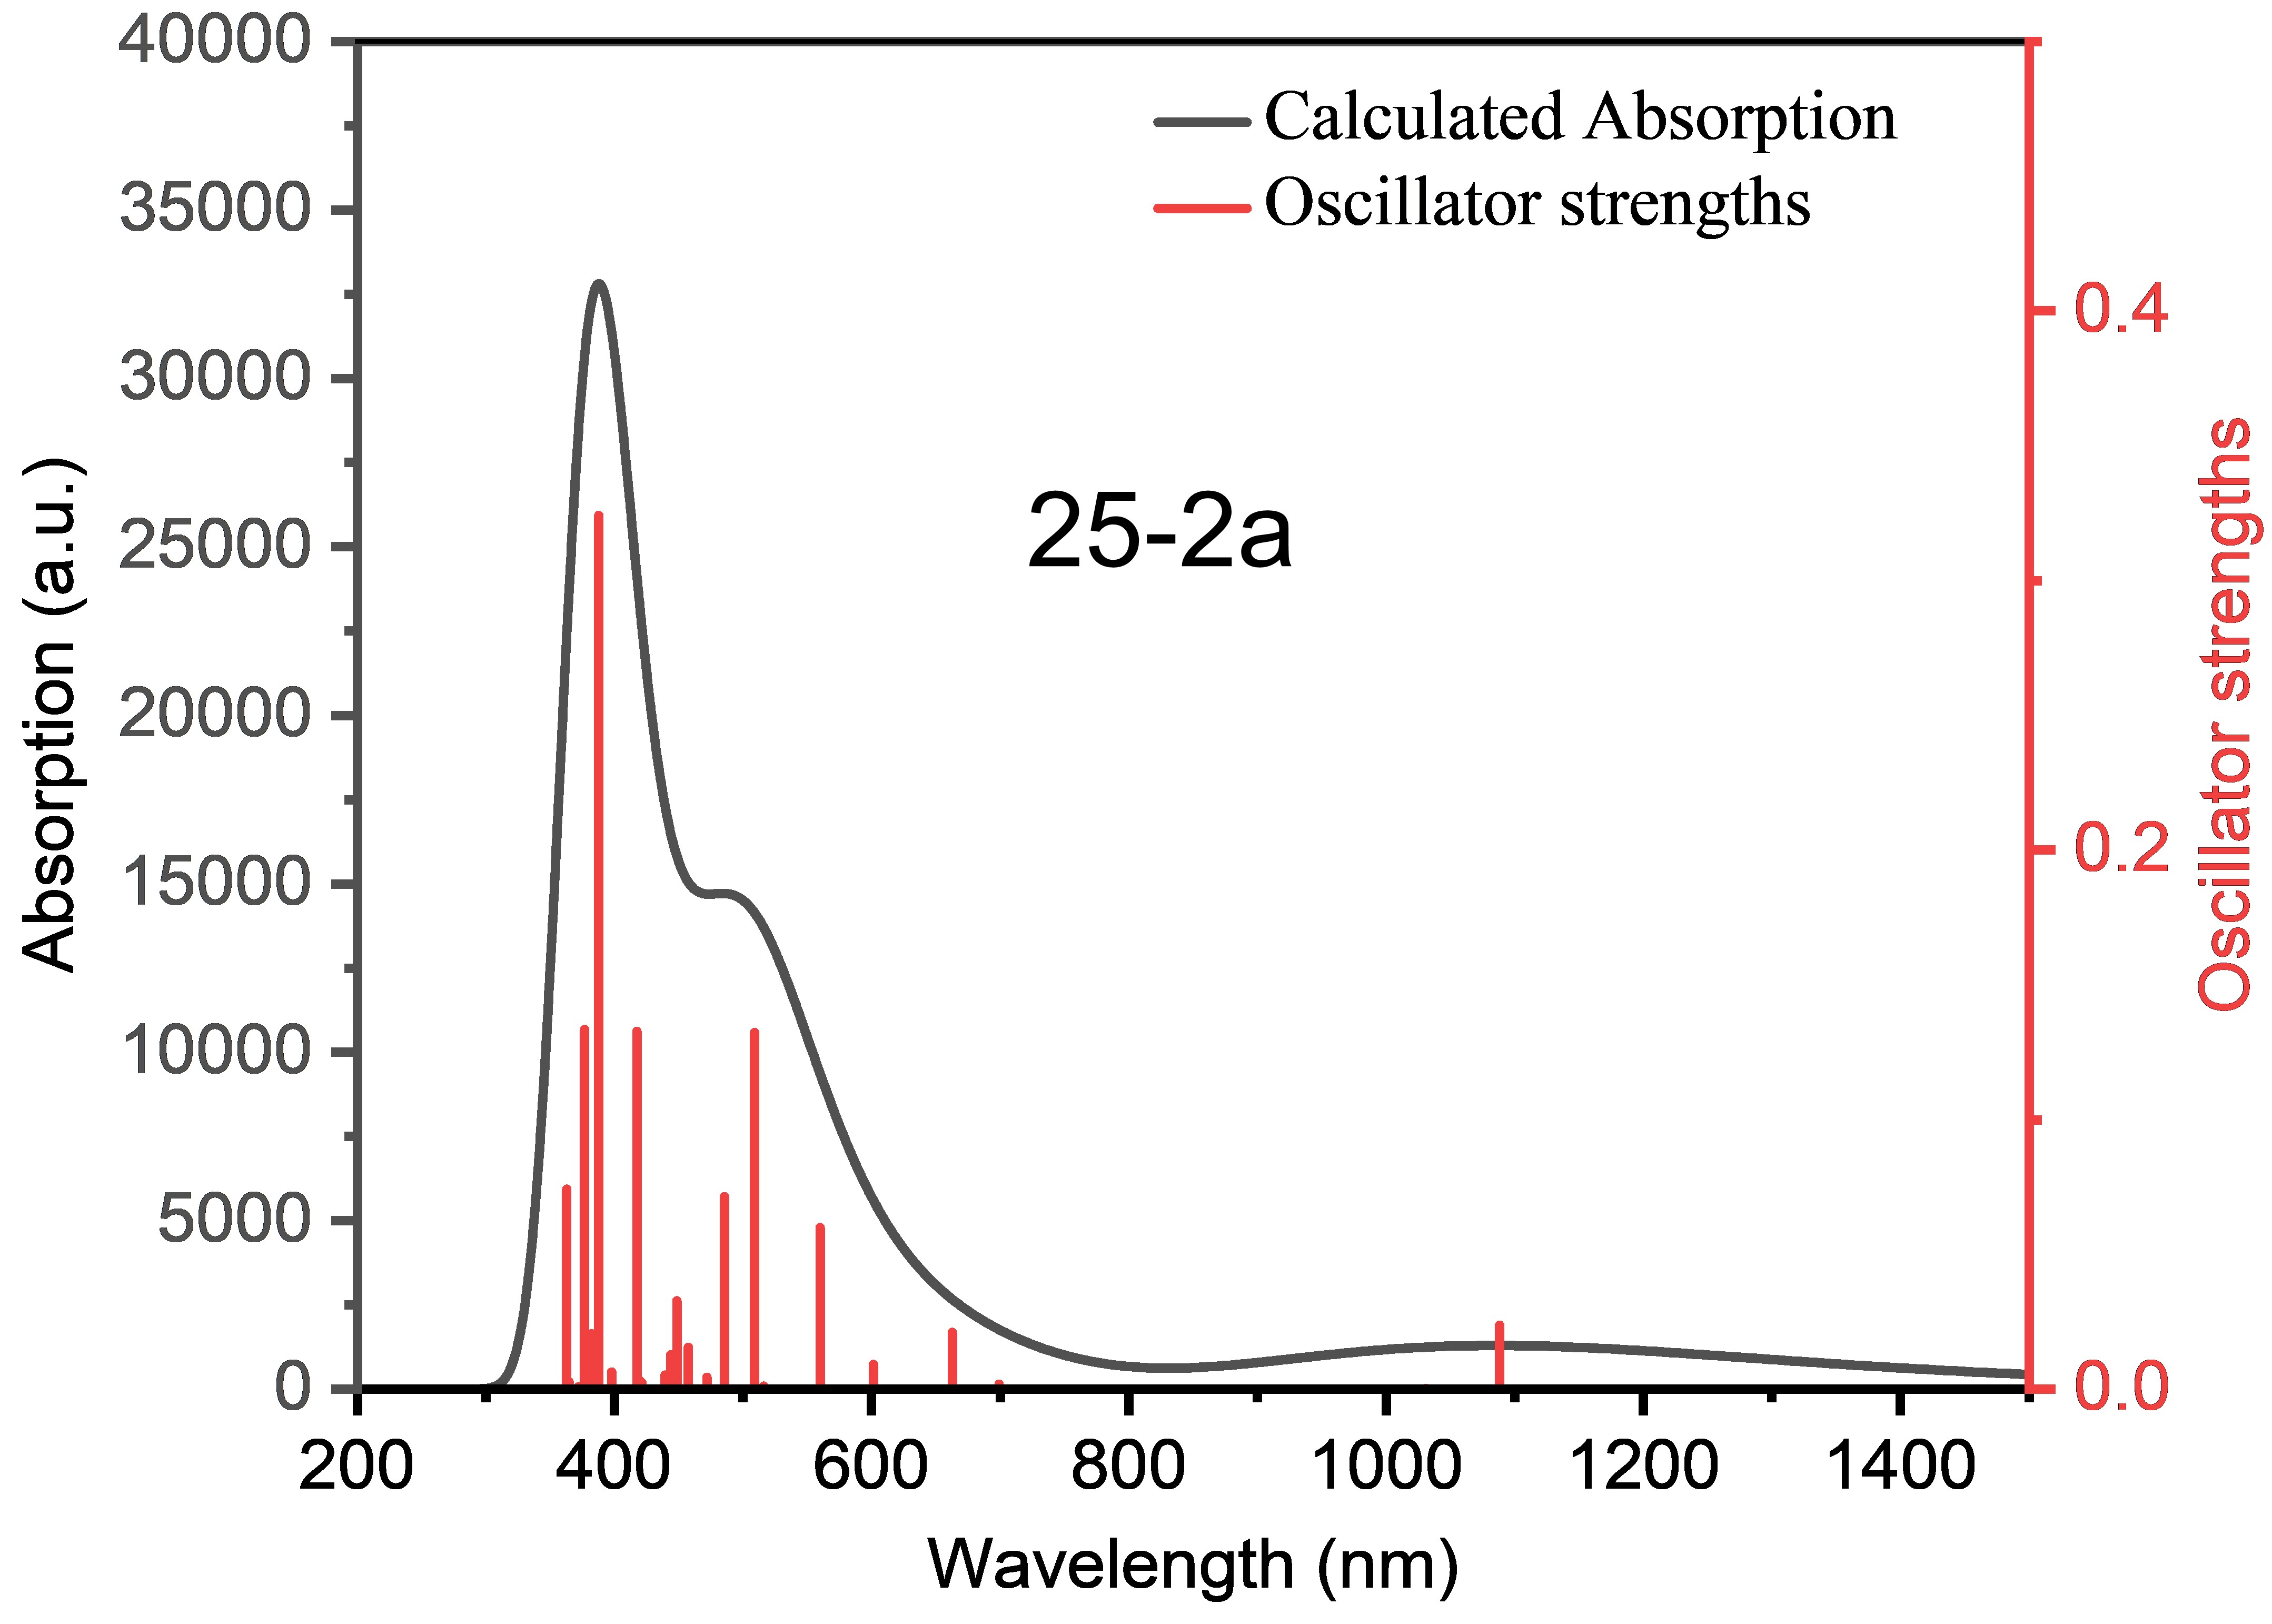


**Figure S40** Calculated UV-vis absorption spectra of the **25-2a** (triple state).

**Table S17** Excitation energies, oscillator strengths and orbital contribution of the S0 → Sn excitations of **25-2a** calculated at the TD-UB3LYP-D3(BJ)/6-31G(d,p) level of theory.

| transition | energy [eV] | energy [nm] | oscillator  strength | orbital contribution | |
| --- | --- | --- | --- | --- | --- |
| S0 → S1 | 1.1394 | 1088.15 | 0.02370 | αH → αL  αH-1 → αL+1 | 78.0%  18.3% |
| S0 → S2 | 1.2028 | 1030.80 | 0.00030 | αH-1 → αL  αH → αL+1 | 65.2%  31.5% |
| S0 → S3 | 1.7735 | 699.09 | 0.00190 | αH → αL+1  αH-1 → αL | 62.3%  31.5% |
| S0 → S4 | 1.8713 | 662.56 | 0.02100 | αH-1 → αL+1  αH → αL | 77.0%  18.9% |
| S0 → S5 | 2.0621 | 601.25 | 0.00920 | βH → βL  αH-2 → αL  βH → βL+2 | 68.1%  10.2%  8.7% |
| S0 → S6 | 2.2140 | 560.00 | 0.06000 | βH-1 → βL  αH-3 → αL  βH → βL+1  βH-1 → βL+2 | 59.7%  11.7%  6.4%  5.8% |
| S0 → S7 | 2.4031 | 515.93 | 0.00110 | βH → βL+2  αH-2 → αL  αH → αL+2  βH → βL | 28.7%  18.3%  15.0%  14.4% |
| S0 → S8 | 2.4367 | 508.82 | 0.13230 | βH → βL+1  βH-1 → βL | 75.4%  6.0% |
| S0 → S9 | 2.5334 | 489.40 | 0.00000 | βH-1 → βL+1  αH-2 → αL  βH-2 → βL | 72.5%  7.7%  6.5% |
| S0 → S10 | 2.5534 | 485.57 | 0.07140 | βH-1 → βL+2  αH-3 → αL  βH-1 → βL | 37.0%  21.7%  20.4% |


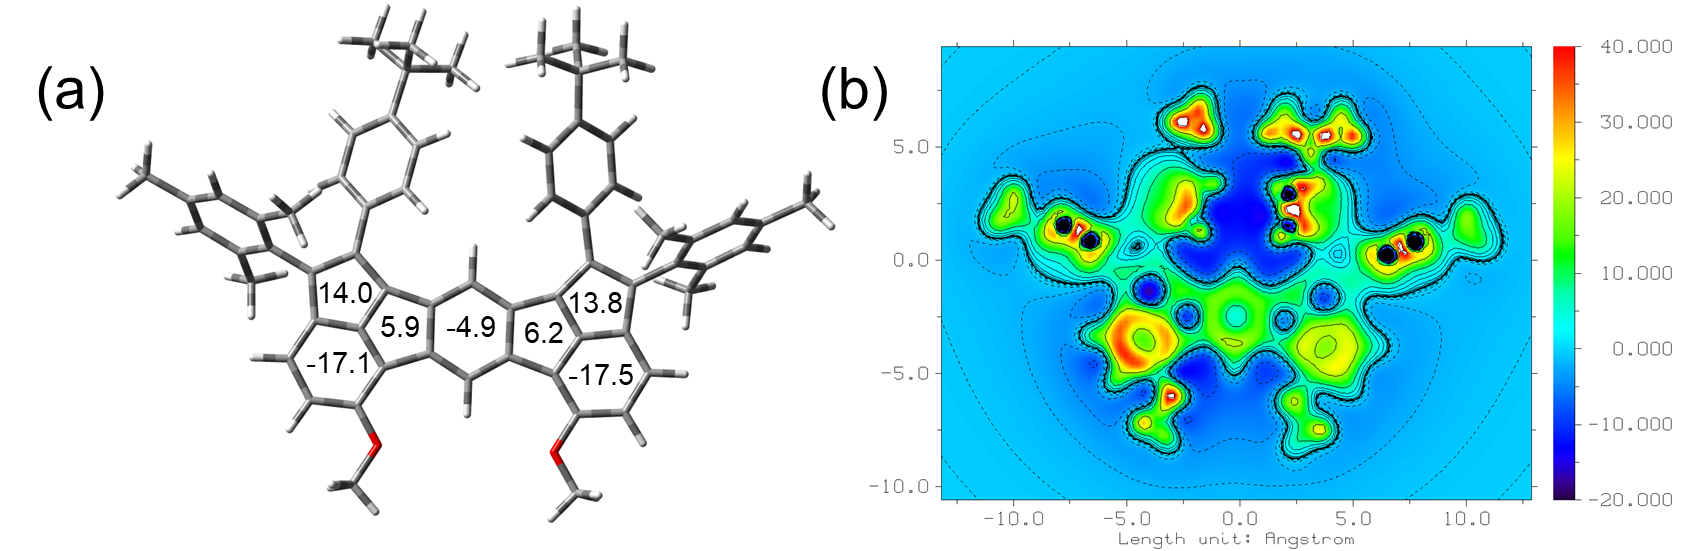


**Figure S41** The aromaticity calculation of compound **25-3a**. (a) **Nucleus-independent chemical shift (NICS) values and** (b) the isotropic chemical shielding surface (ICSS) maps based on DFT U**B3LYP/6-31G(d,p) level.**


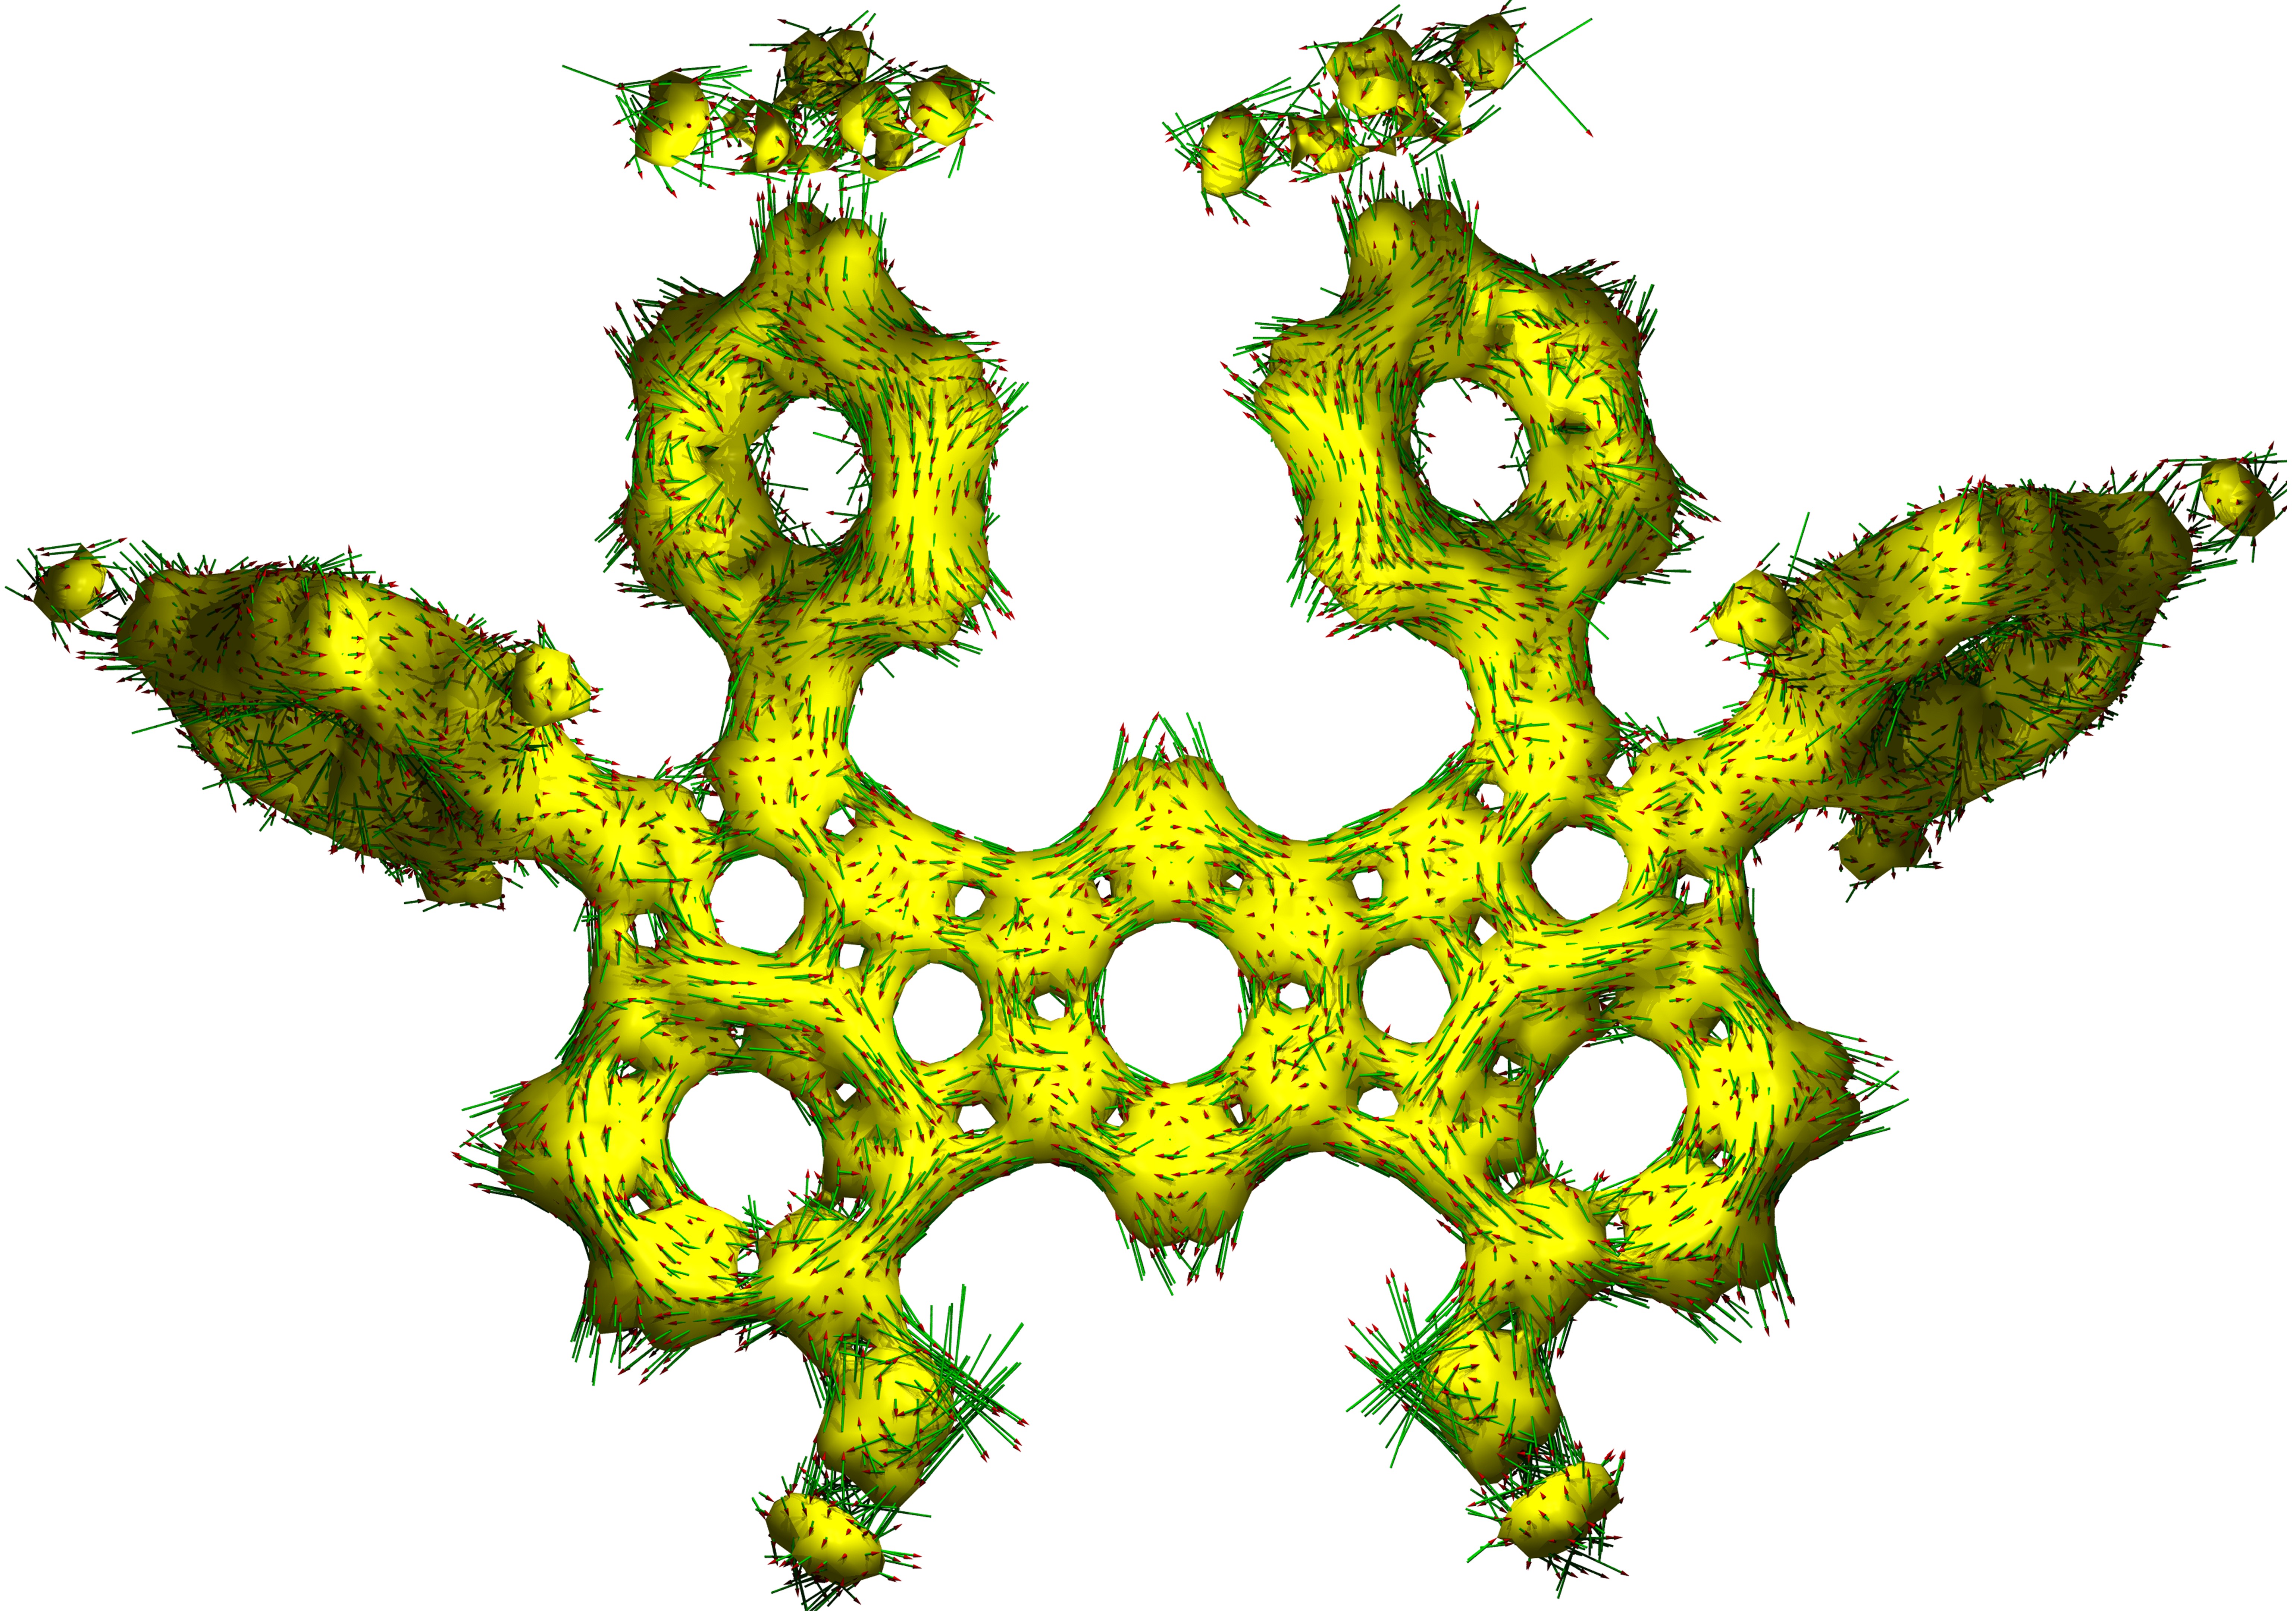


**Figure S42** The aromaticity calculation of compound **25-3a**. **The calculated** anisotropy of the induced current density (ACID) plots based on DFT U**B3LYP/6-31G(d,p) level.**


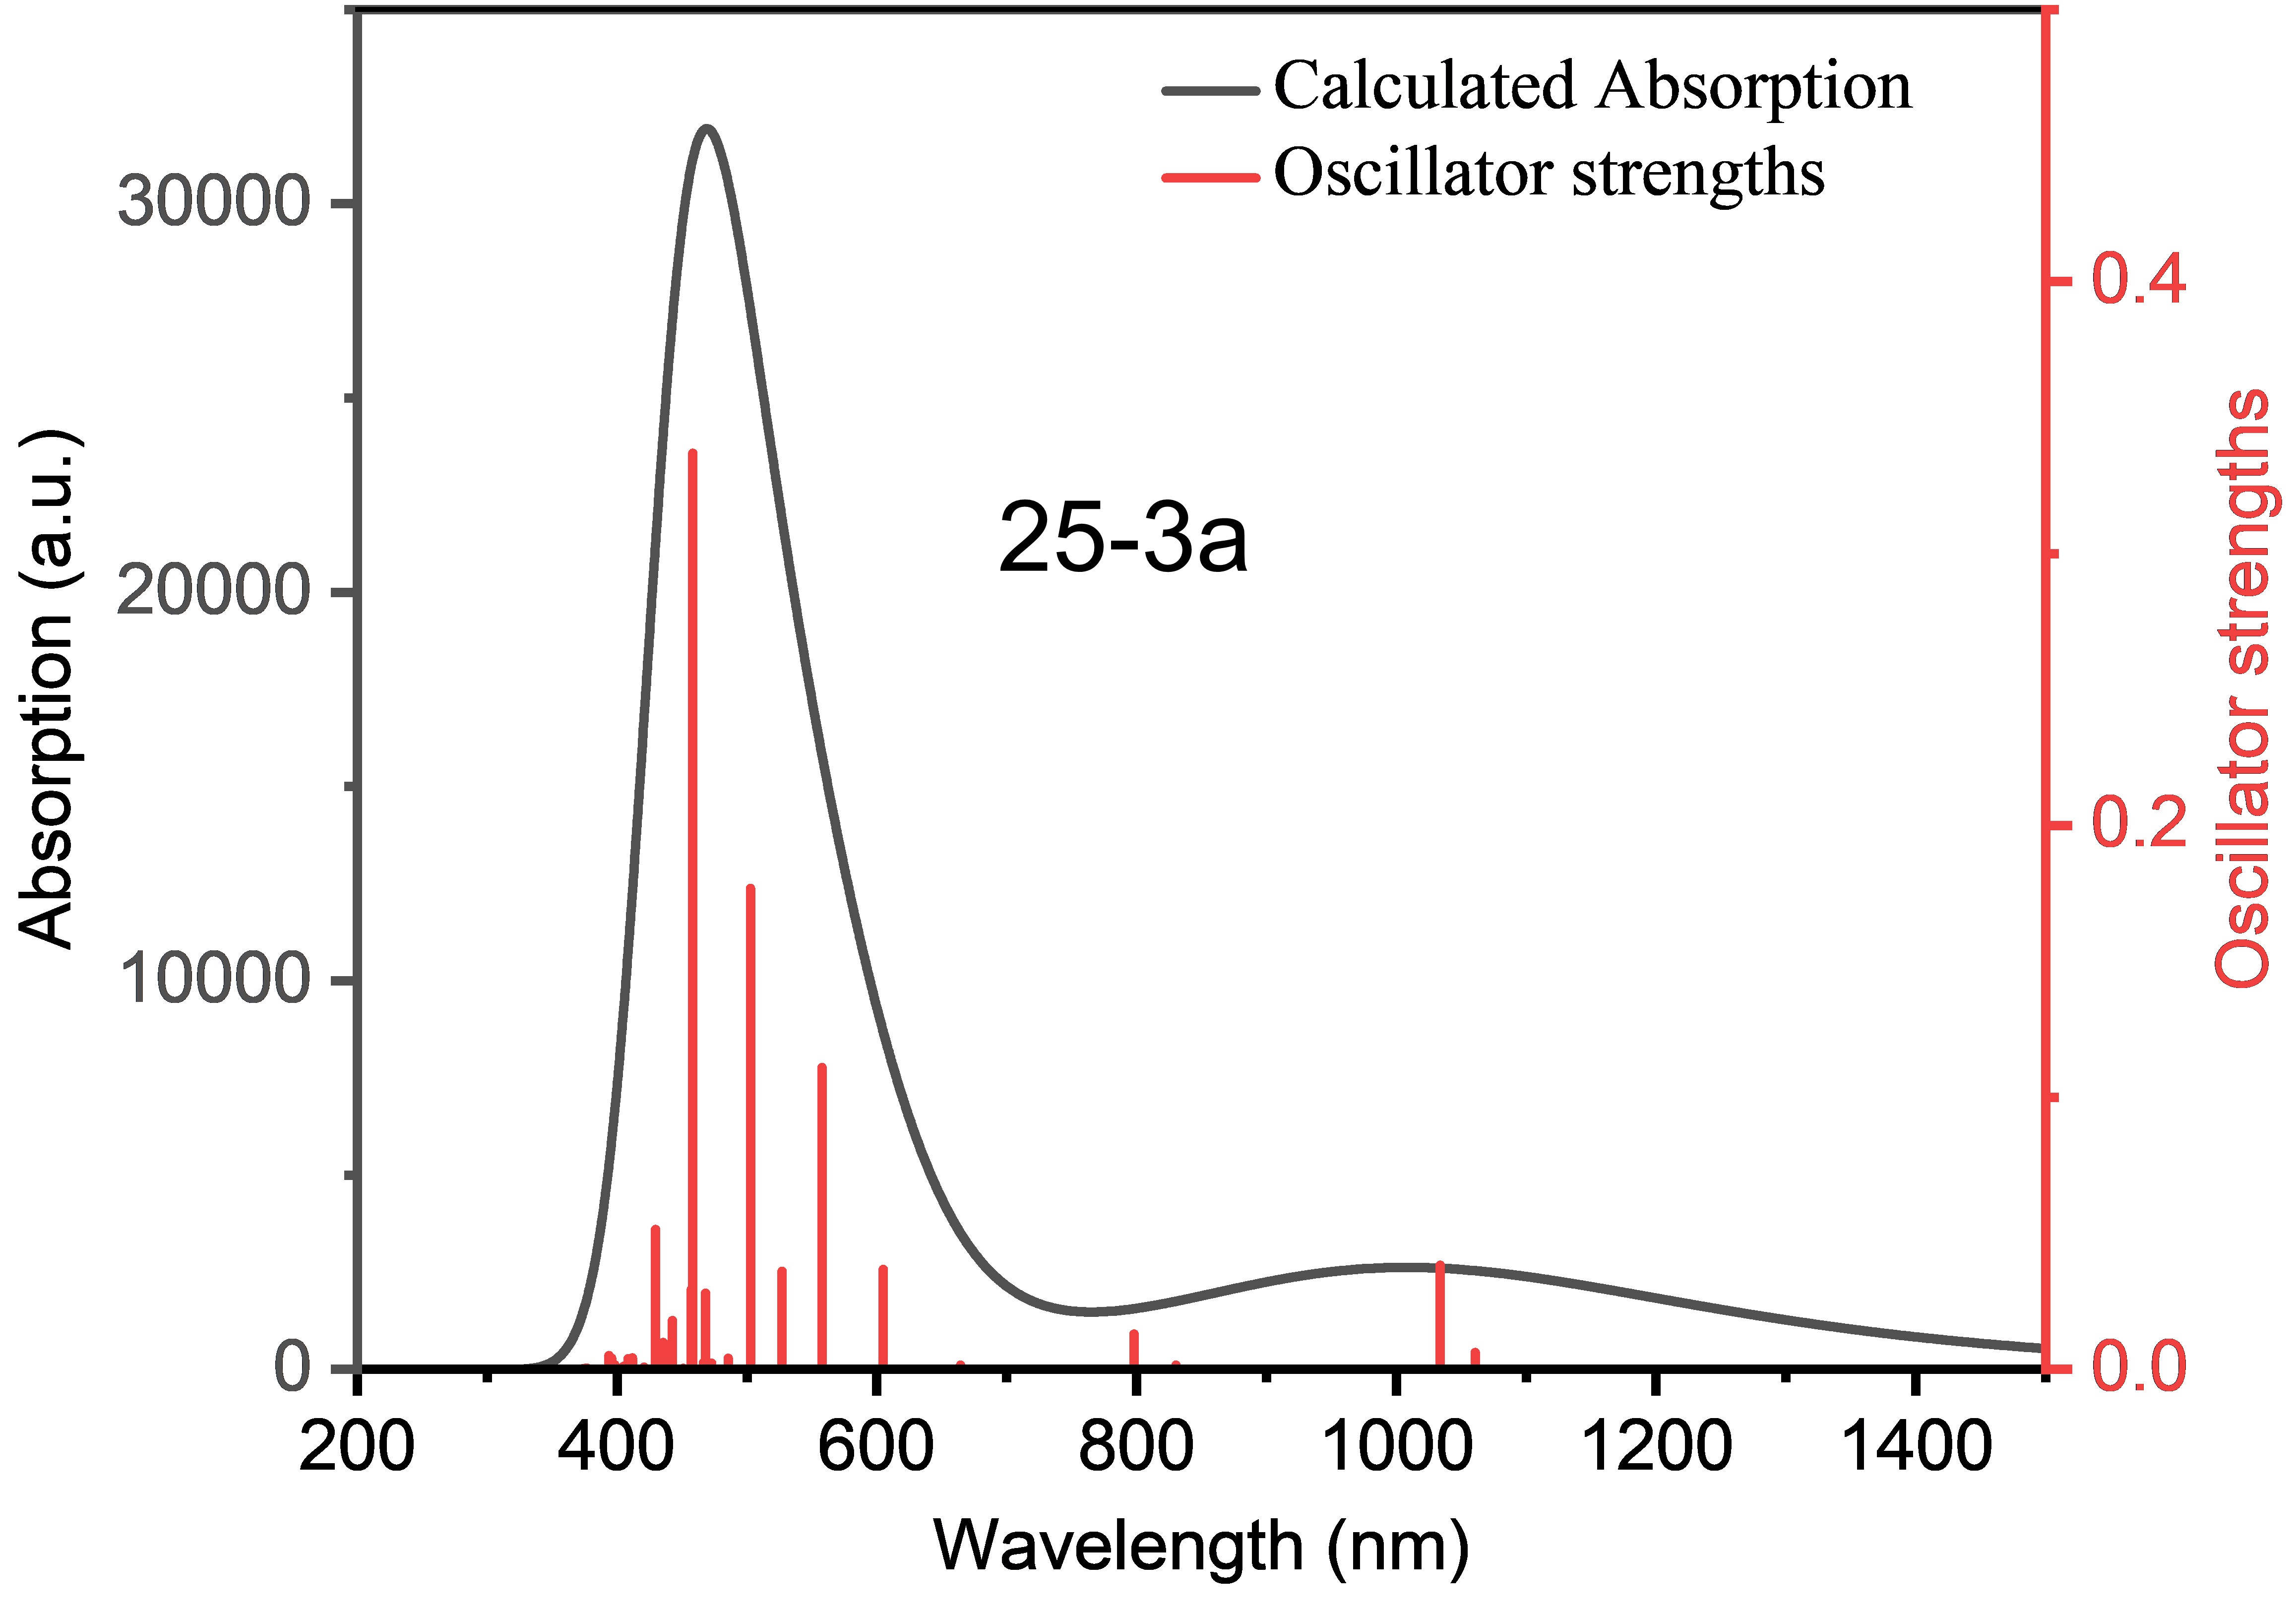


**Figure S43** Calculated UV-vis absorption spectra of the **25-3a** (triple state)

**Table S18** Excitation energies, oscillator strengths and orbital contribution of the S0 → Sn excitations of **25-3a** calculated at the TD-UB3LYP-D3(BJ)/6-31G(d,p) level of theory.

| transition | energy [eV] | energy [nm] | oscillator  strength | orbital contribution | |
| --- | --- | --- | --- | --- | --- |
| S0 → S1 | 1.1689 | 1060.69 | 00.00620 | βH → βL  βH-1 → βL+1 | 71.8%  20.2% |
| S0 → S2 | 1.1993 | 1033.80 | 0.03830 | βH-1 → βL  βH → βL+1 | 57.5%  31.9% |
| S0 → S3 | 1.4935 | 830.16 | 0.00160 | βH-1 → βL+1  βH-2 → βL  βH → βL | 50.3%  24.4%  19.2% |
| S0 → S4 | 1.5534 | 798.15 | 0.01300 | βH → βL+1  βH-1 → βL | 56.6%  32.5% |
| S0 → S5 | 1.8660 | 664.44 | 0.00150 | βH-2 → βL  βH-1 → βL+1 | 72.1%  21.0% |
| S0 → S6 | 2.0496 | 604.92 | 0.03670 | βH-2 → βL+1  βH-3 → βL  βH-1 → βL | 78.4%  7.3%  6.6% |
| S0 → S7 | 2.2222 | 557.93 | 0.11090 | βH-3 → βL  αH → αL  βH-2 → βL+1  βH-4 → βL+1 | 62.6%  18.4%  6.2%  5.3% |
| S0 → S8 | 2.3527 | 526.99 | 0.03610 | βH-3 → βL+1  βH-4 → βL | 53.6%  34.1% |
| S0 → S9 | 2.4664 | 502.69 | 0.17690 | βH-4 → βL+1  αH → αL  βH-7 → βL  βH-3 → βL  βH-5 → βL | 28.3%  25.9%  22.3%  7.4%  6.4% |
| S0 → S10 | 2.5536 | 485.53 | 0.00410 | βH-4 → βL  βH-7 → βL+1  βH-3 → βL+1  βH-5 → βL+1  αH-2 → αL  αH-1 → αL | 38.2%  18.0%  10.3%  7.5%  6.7%  5.5% |


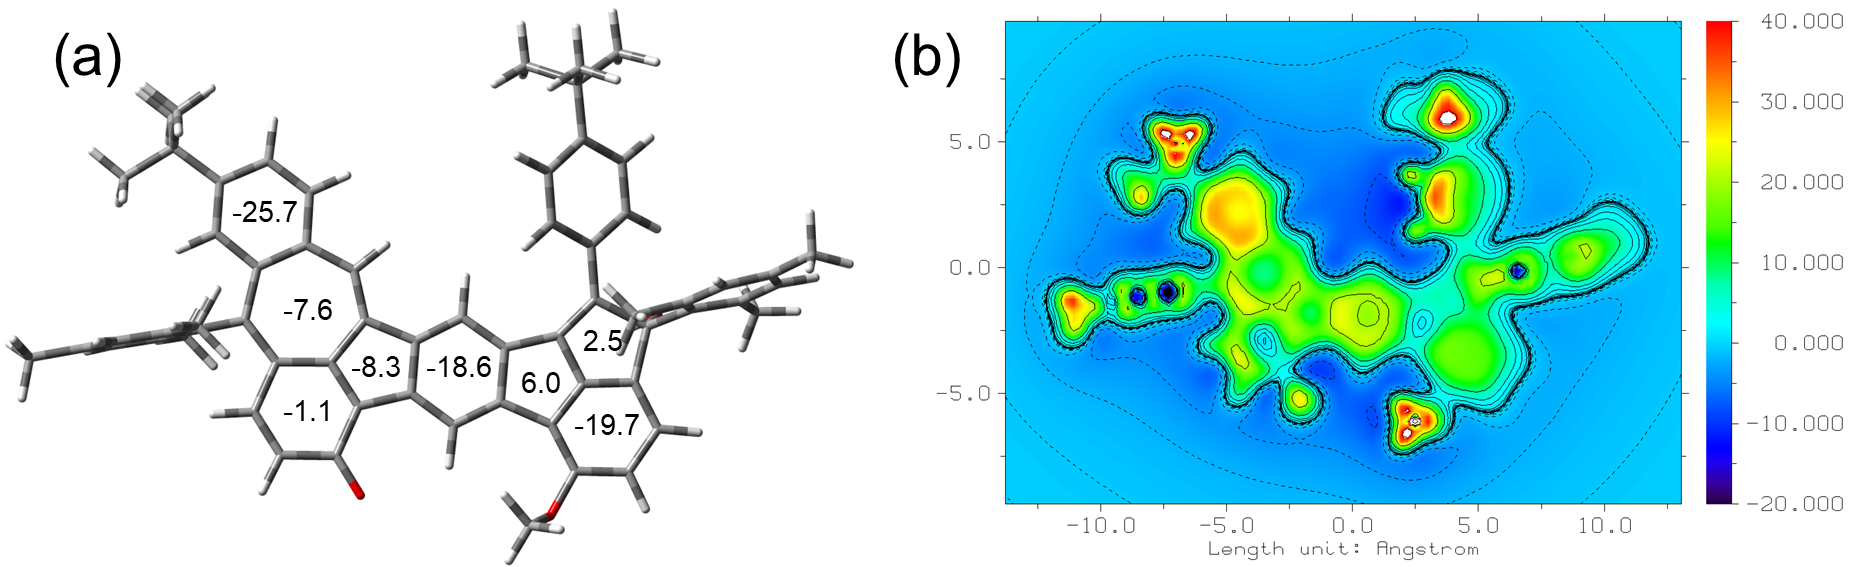


**Figure S44** The aromaticity calculation of compound **26-1a**. (a) **Nucleus-independent chemical shift (NICS) values** and (b) the isotropic chemical shielding surface (ICSS) maps based on DFT **B3LYP/6-31G(d,p) level.**


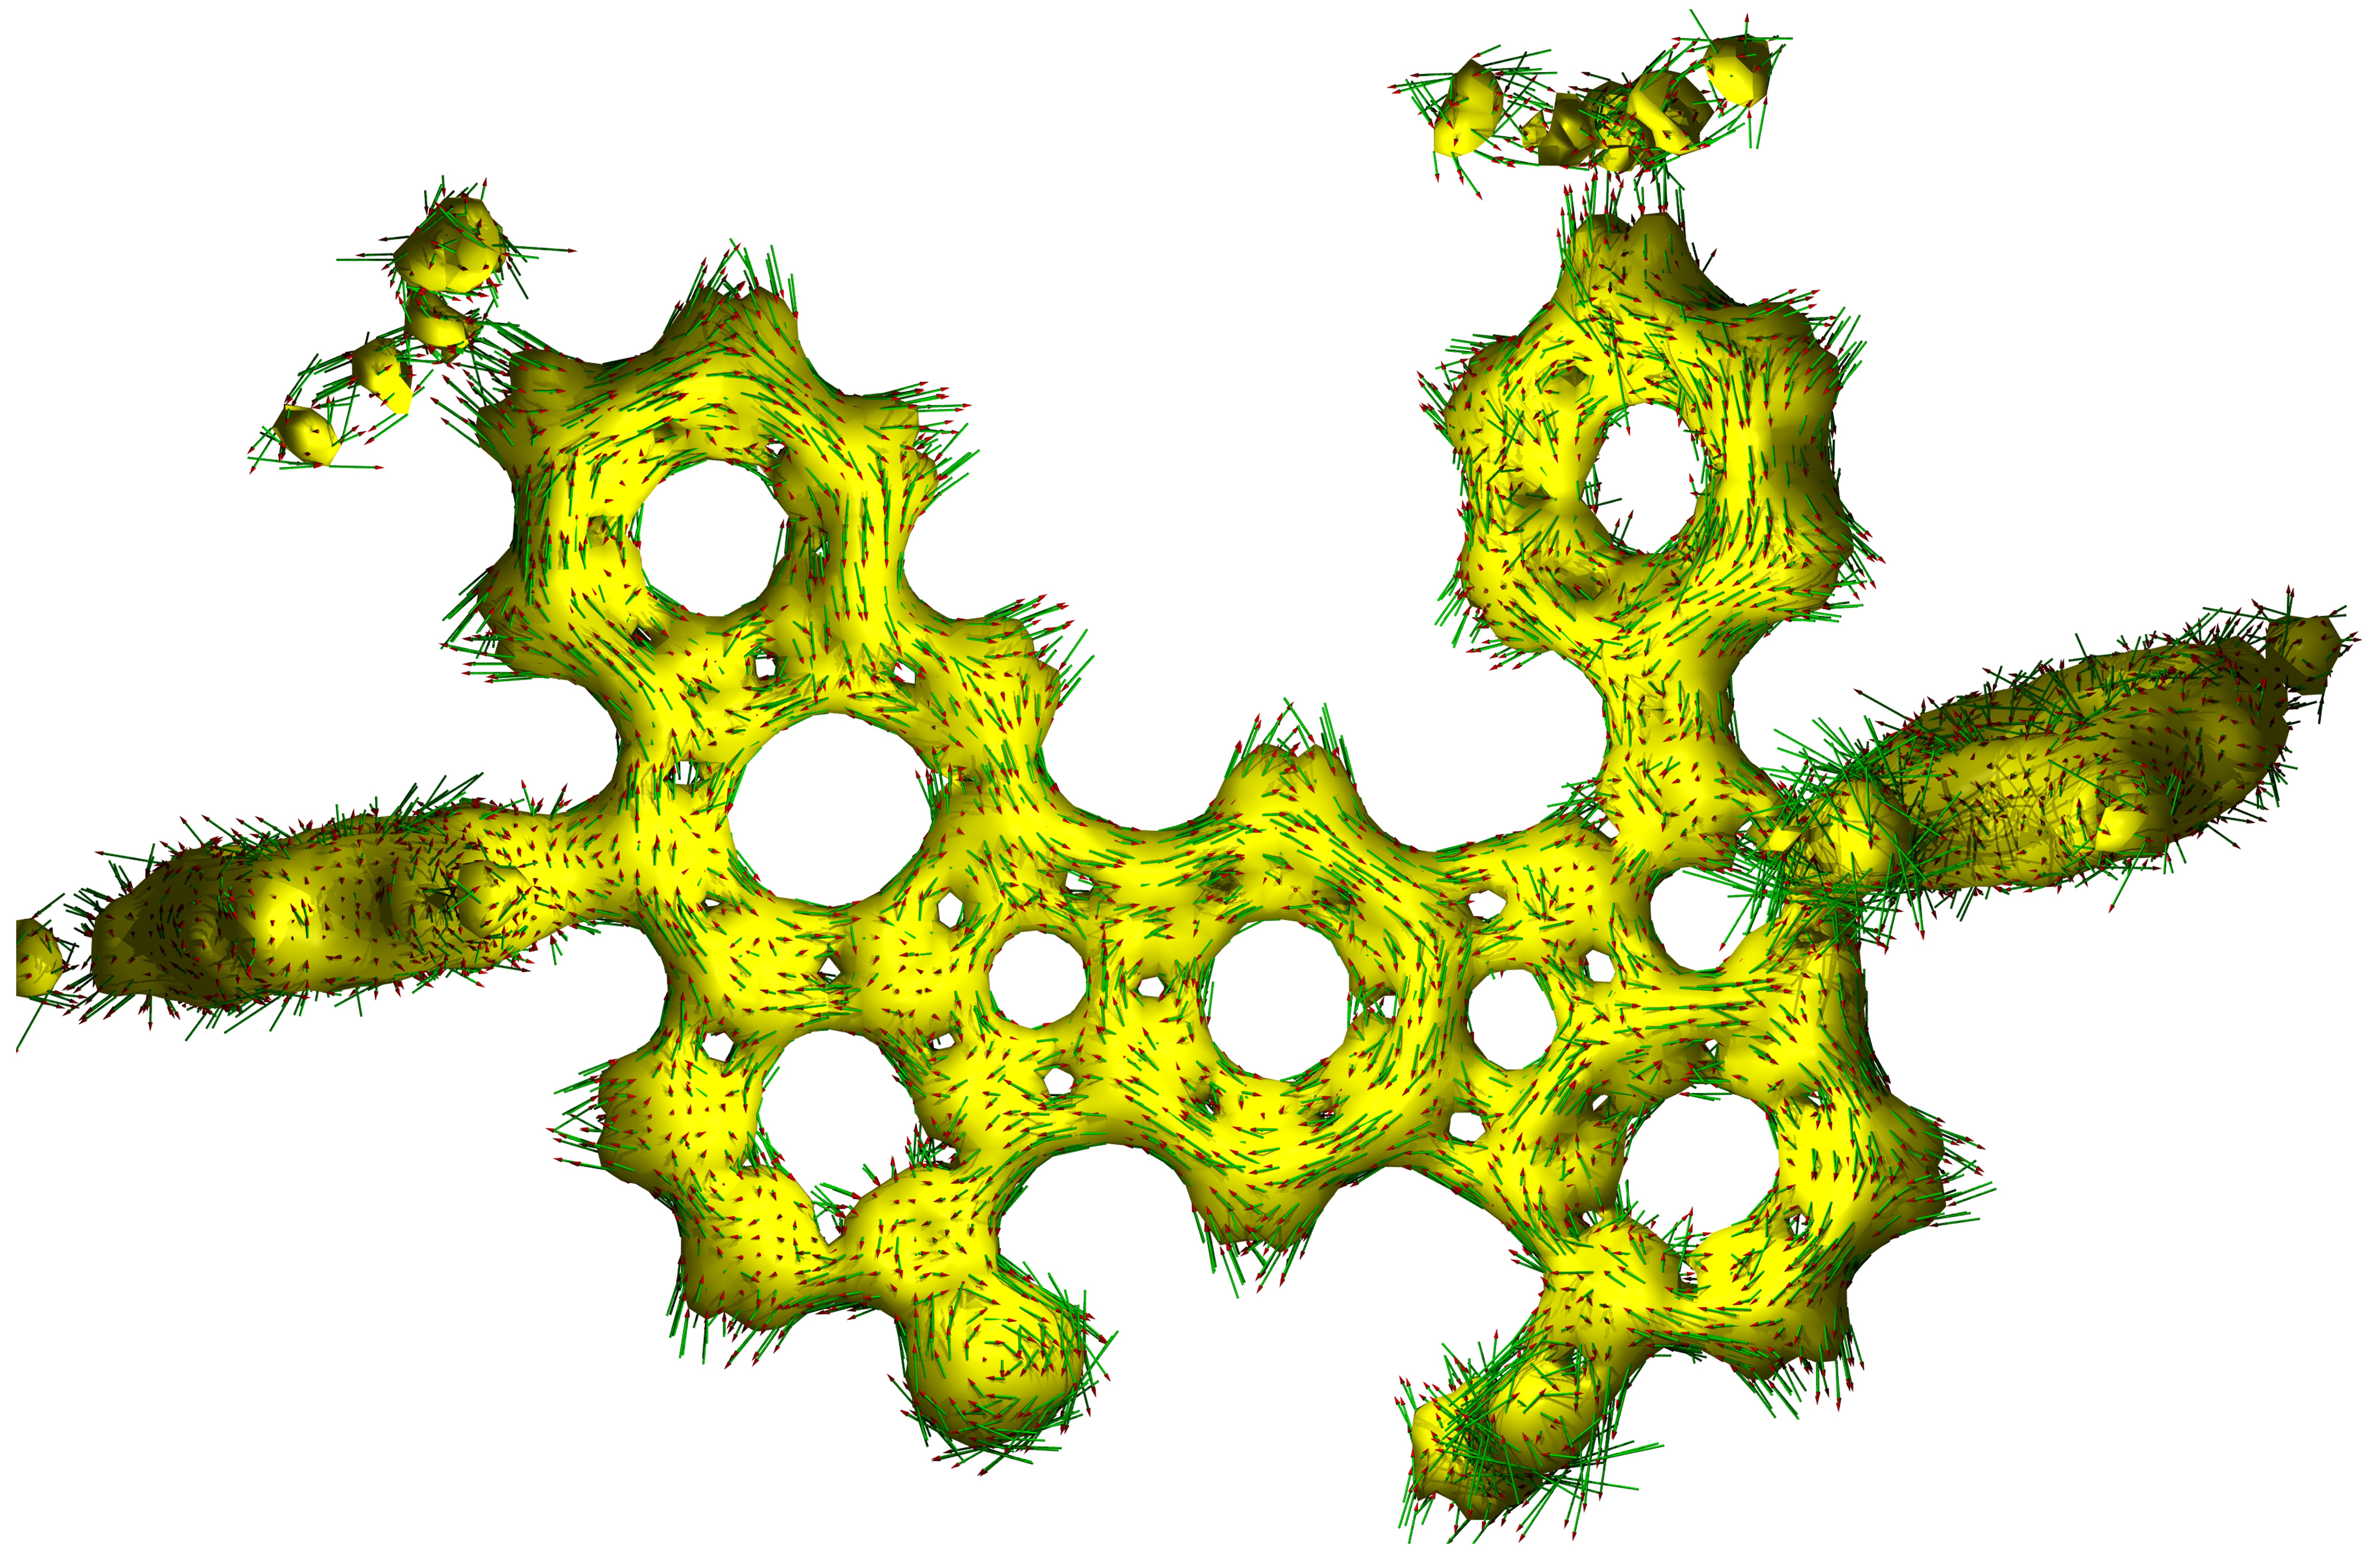


**Figure S45** The aromaticity calculation of compound **26-1a**. **The calculated** anisotropy of the induced current density (ACID) plots based on DFT **B3LYP/6-31G(d,p) level.**


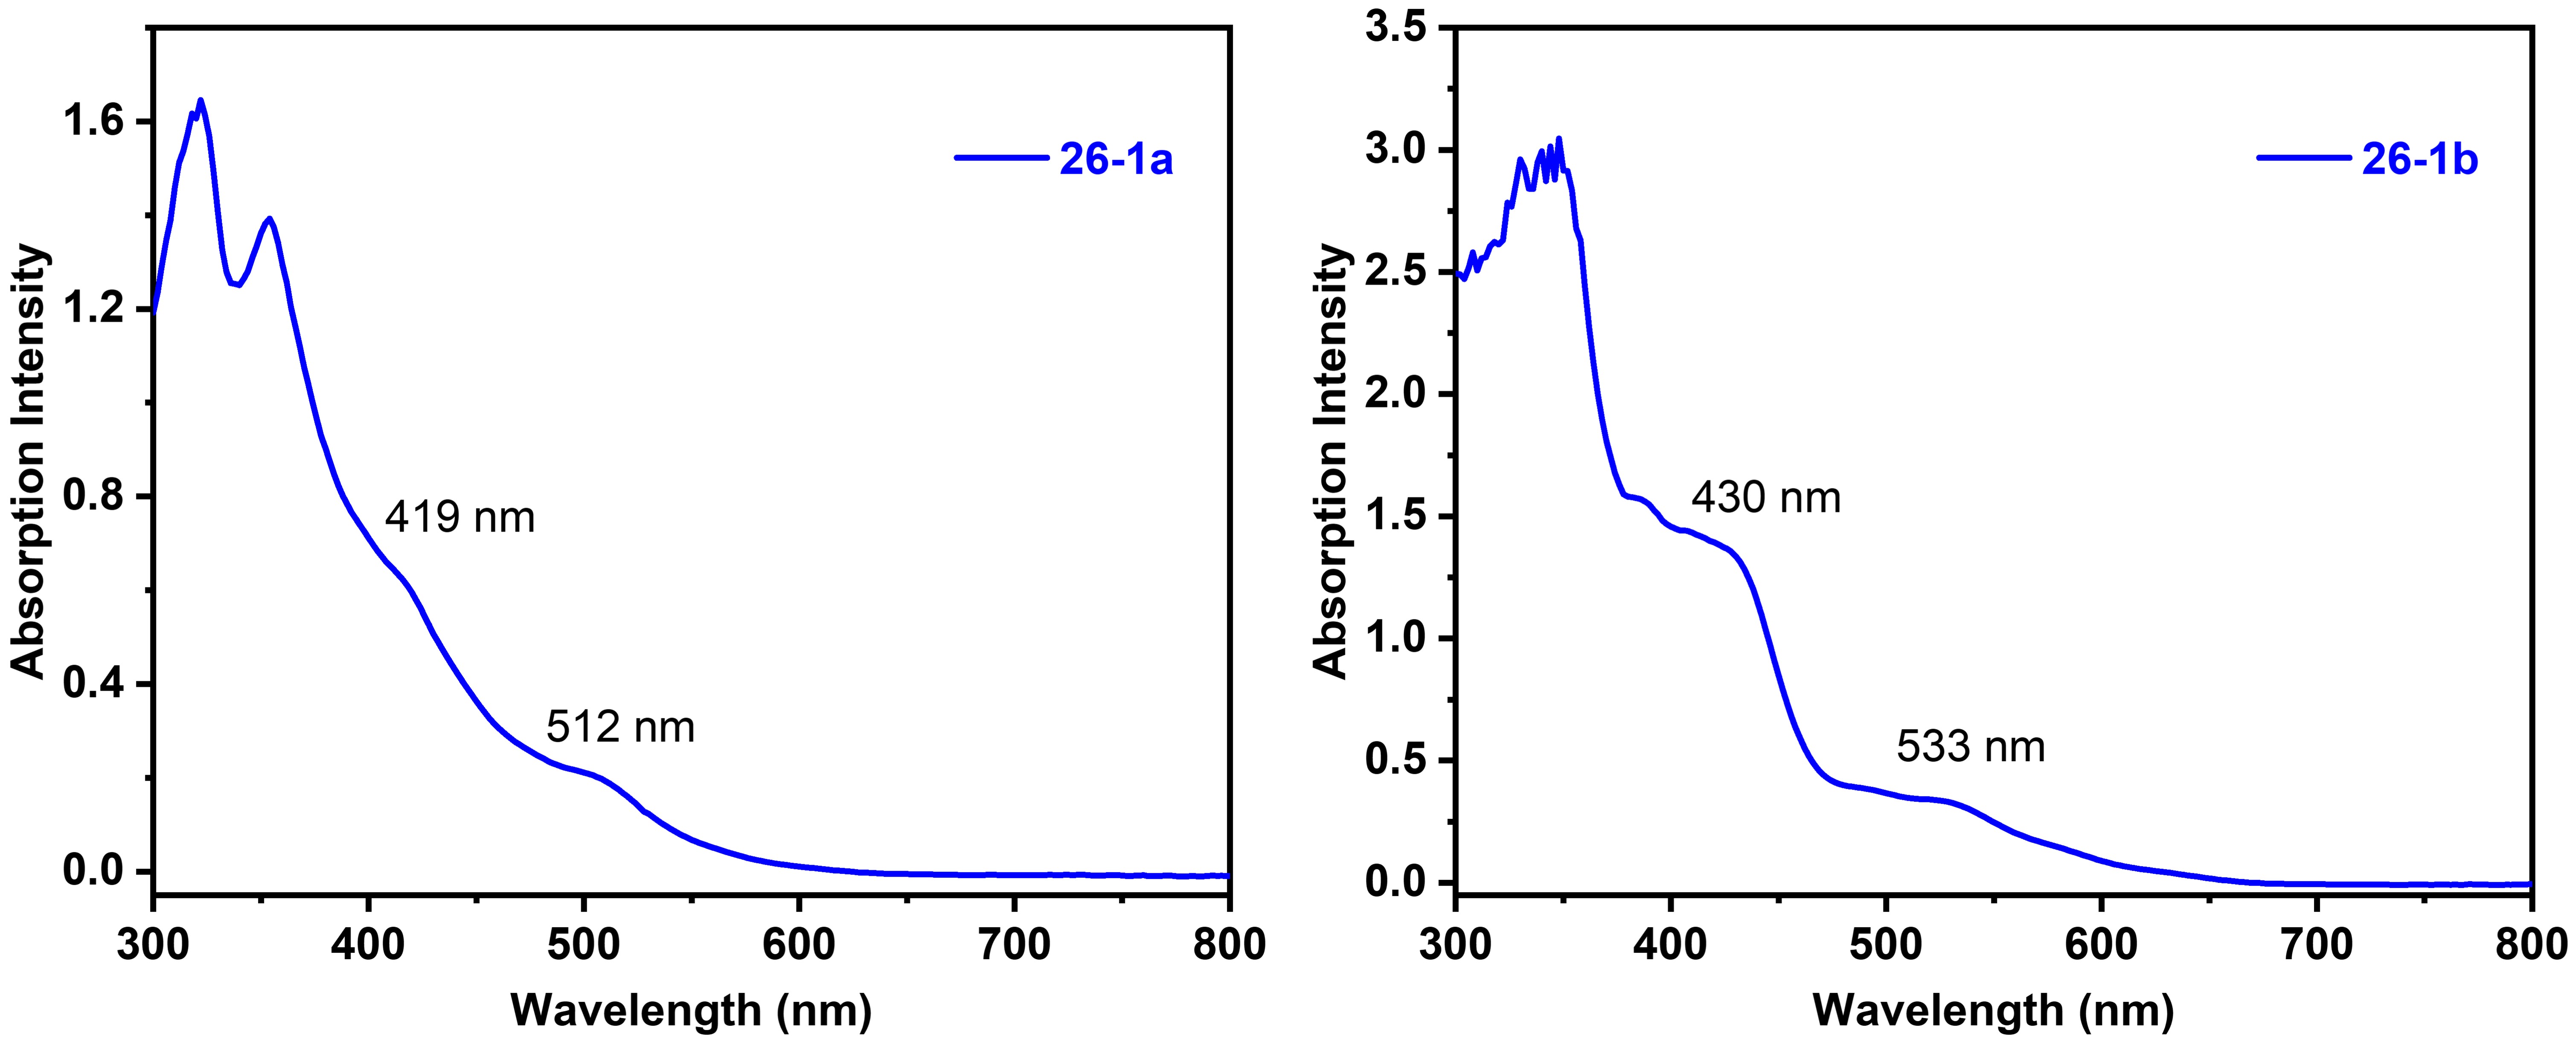


**Figure S46** UV-vis absorption spectrum of compound **26-1a** in dichloromethane solution (10-5 mol/L).


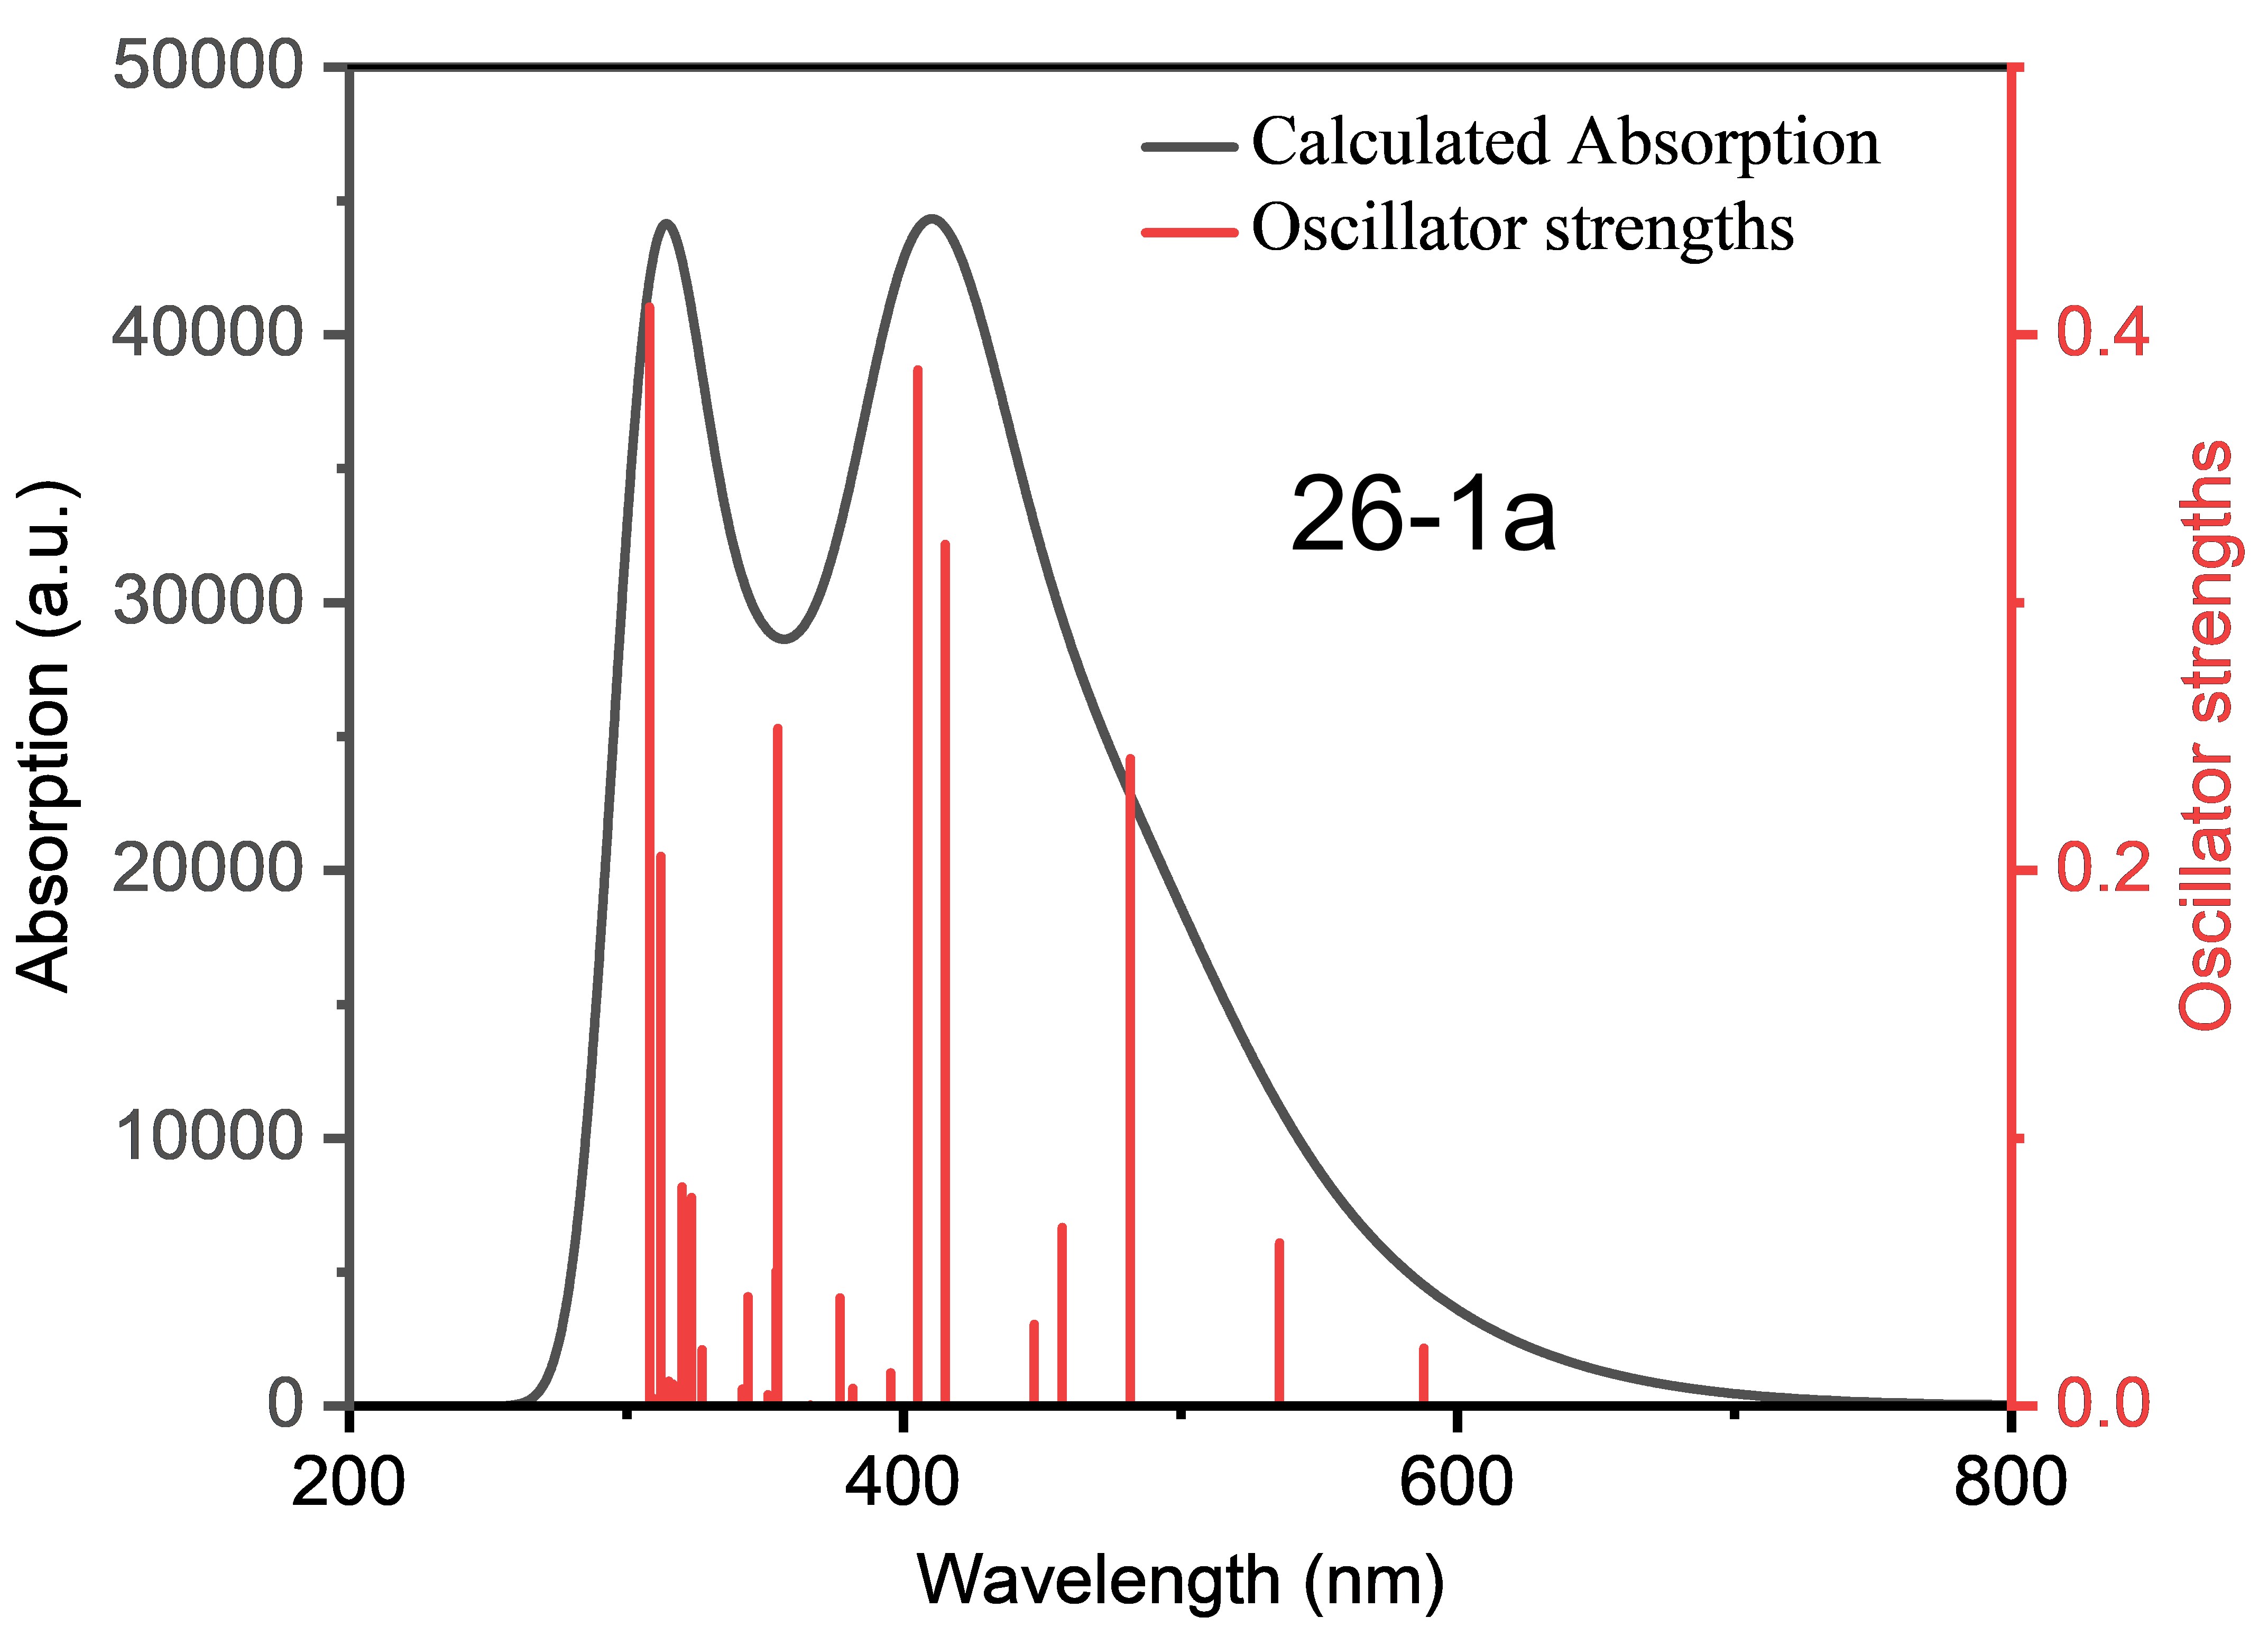


**Figure S47** Calculated UV-vis absorption spectra of the **26-1a** (closed-shell single state).

**Table S19** Excitation energies, oscillator strengths and orbital contribution of the S0 → Sn excitations of **26-1a** calculated at the TD-B3LYP-D3(BJ)/6-31G(d,p) level of theory.

| transition | energy [eV] | energy [nm] | oscillator  strength | orbital contribution | |
| --- | --- | --- | --- | --- | --- |
| S0 → S1 | 2.1090 | 587.88 | 0.02160 | H → L  H→ L+1 | 79.0%  14.8% |
| S0 → S2 | 2.3145 | 535.68 | 0.06090 | H → L+1  H → L  H-1 → L | 66.4%  16.0%  9.6% |
| S0 → S3 | 2.5730 | 481.87 | 0.24180 | H-1 → L  H → L+1 | 81.8%  11.1% |
| S0 → S4 | 2.6474 | 468.32 | 0.00010 | H-5 → L | 92.3% |
| S0 → S5 | 2.7112 | 457.30 | 0.06670 | H-1 → L+1  H-2 → L | 52.4%  41.6% |
| S0 → S6 | 2.7725 | 447.19 | 0.03060 | H-2 → L  H-1 → L+1  H-2 → L+1  H → L+1 | 38.1%  27.1%  24.3%  5.2% |
| S0 → S7 | 2.9869 | 415.09 | 0.32170 | H-2 → L+1  H-1 →L+1  H-2 → L  H-1 → L+2 | 59.0%  9.6%  9.3%  6.2% |
| S0 → S8 | 3.0599 | 405.19 | 0.38690 | H → L+2  H-1 → L+2 | 87.2%  5.4% |
| S0 → S9 | 3.1357 | 395.40 | 0.01250 | H-3 → L | 96.2% |
| S0 → S10 | 3.2055 | 386.79 | 0.00010 | H-5 → L+1 | 94.1% |


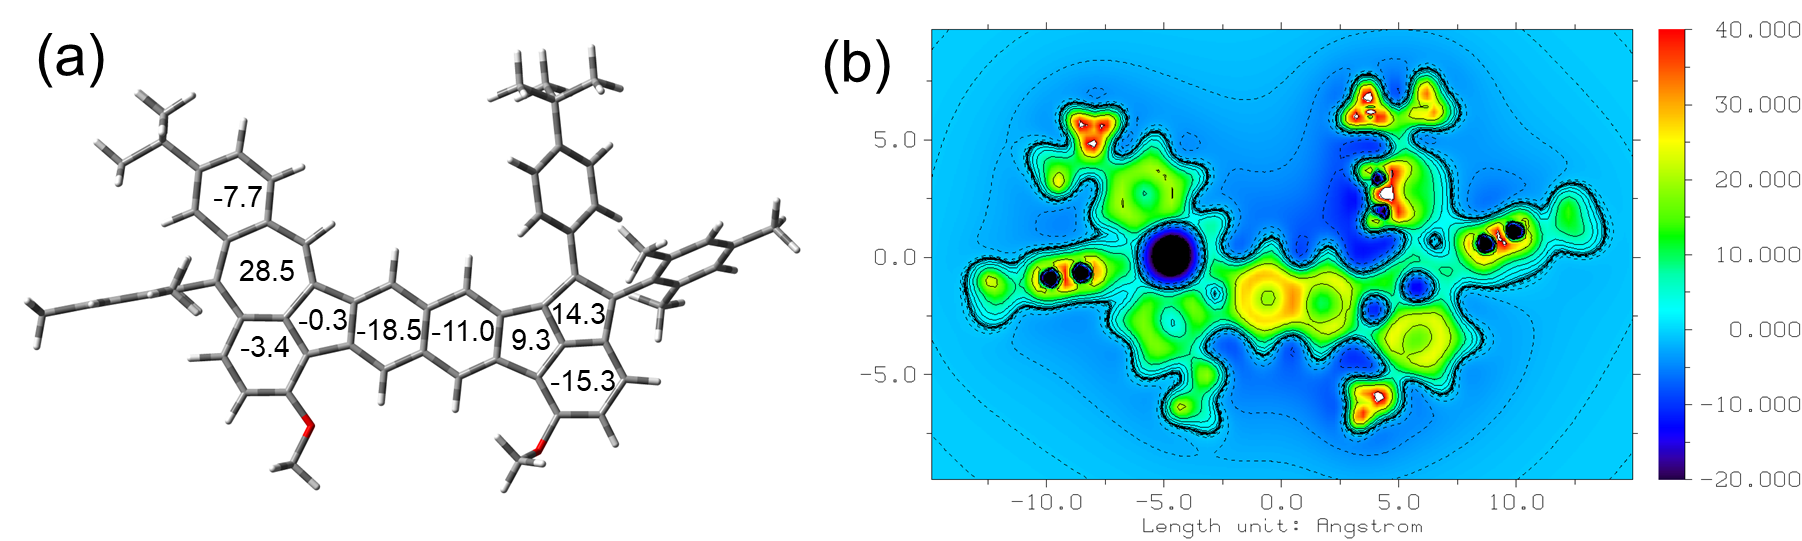


**Figure S48** The aromaticity calculation of compound **25-1b**. (a) **Nucleus-independent chemical shift (NICS) values** and (b) the isotropic chemical shielding surface (ICSS) maps based on DFT U**B3LYP/6-31G(d,p) level.**


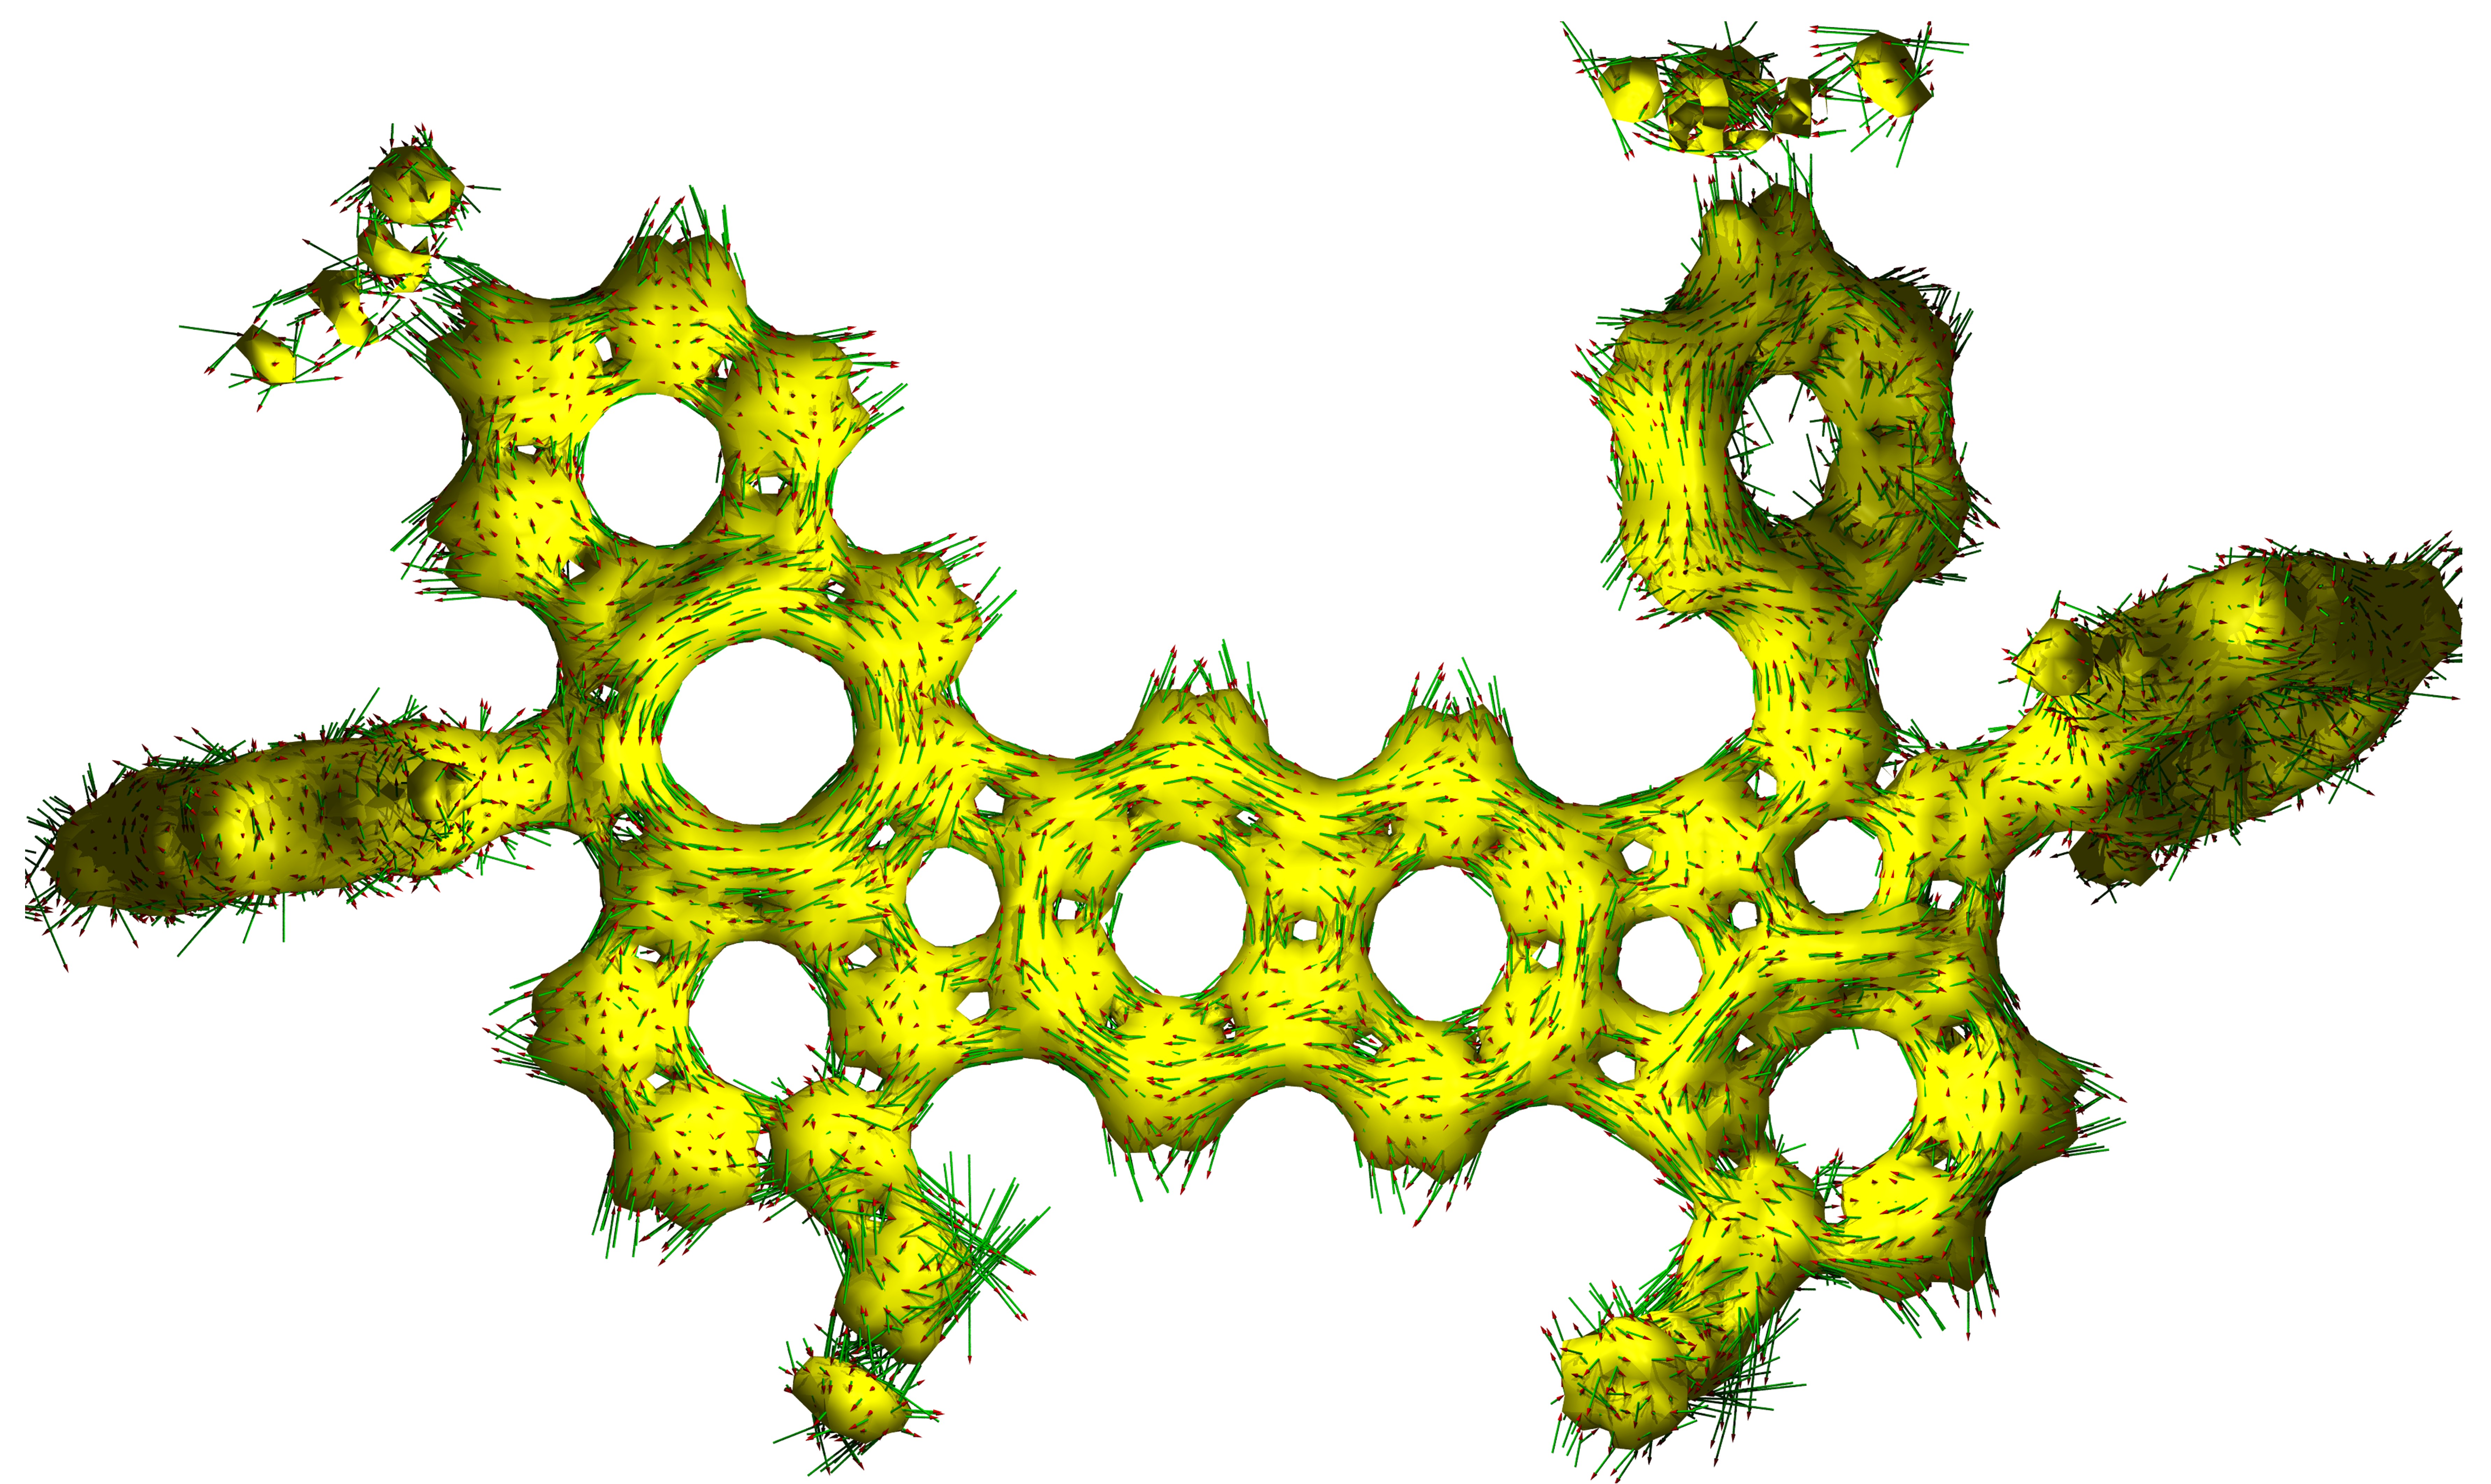


**Figure S49** The aromaticity calculation of compound **25-1b**. **The calculated** anisotropy of the induced current density (ACID) plots based on DFT U**B3LYP/6-31G(d,p) level.**


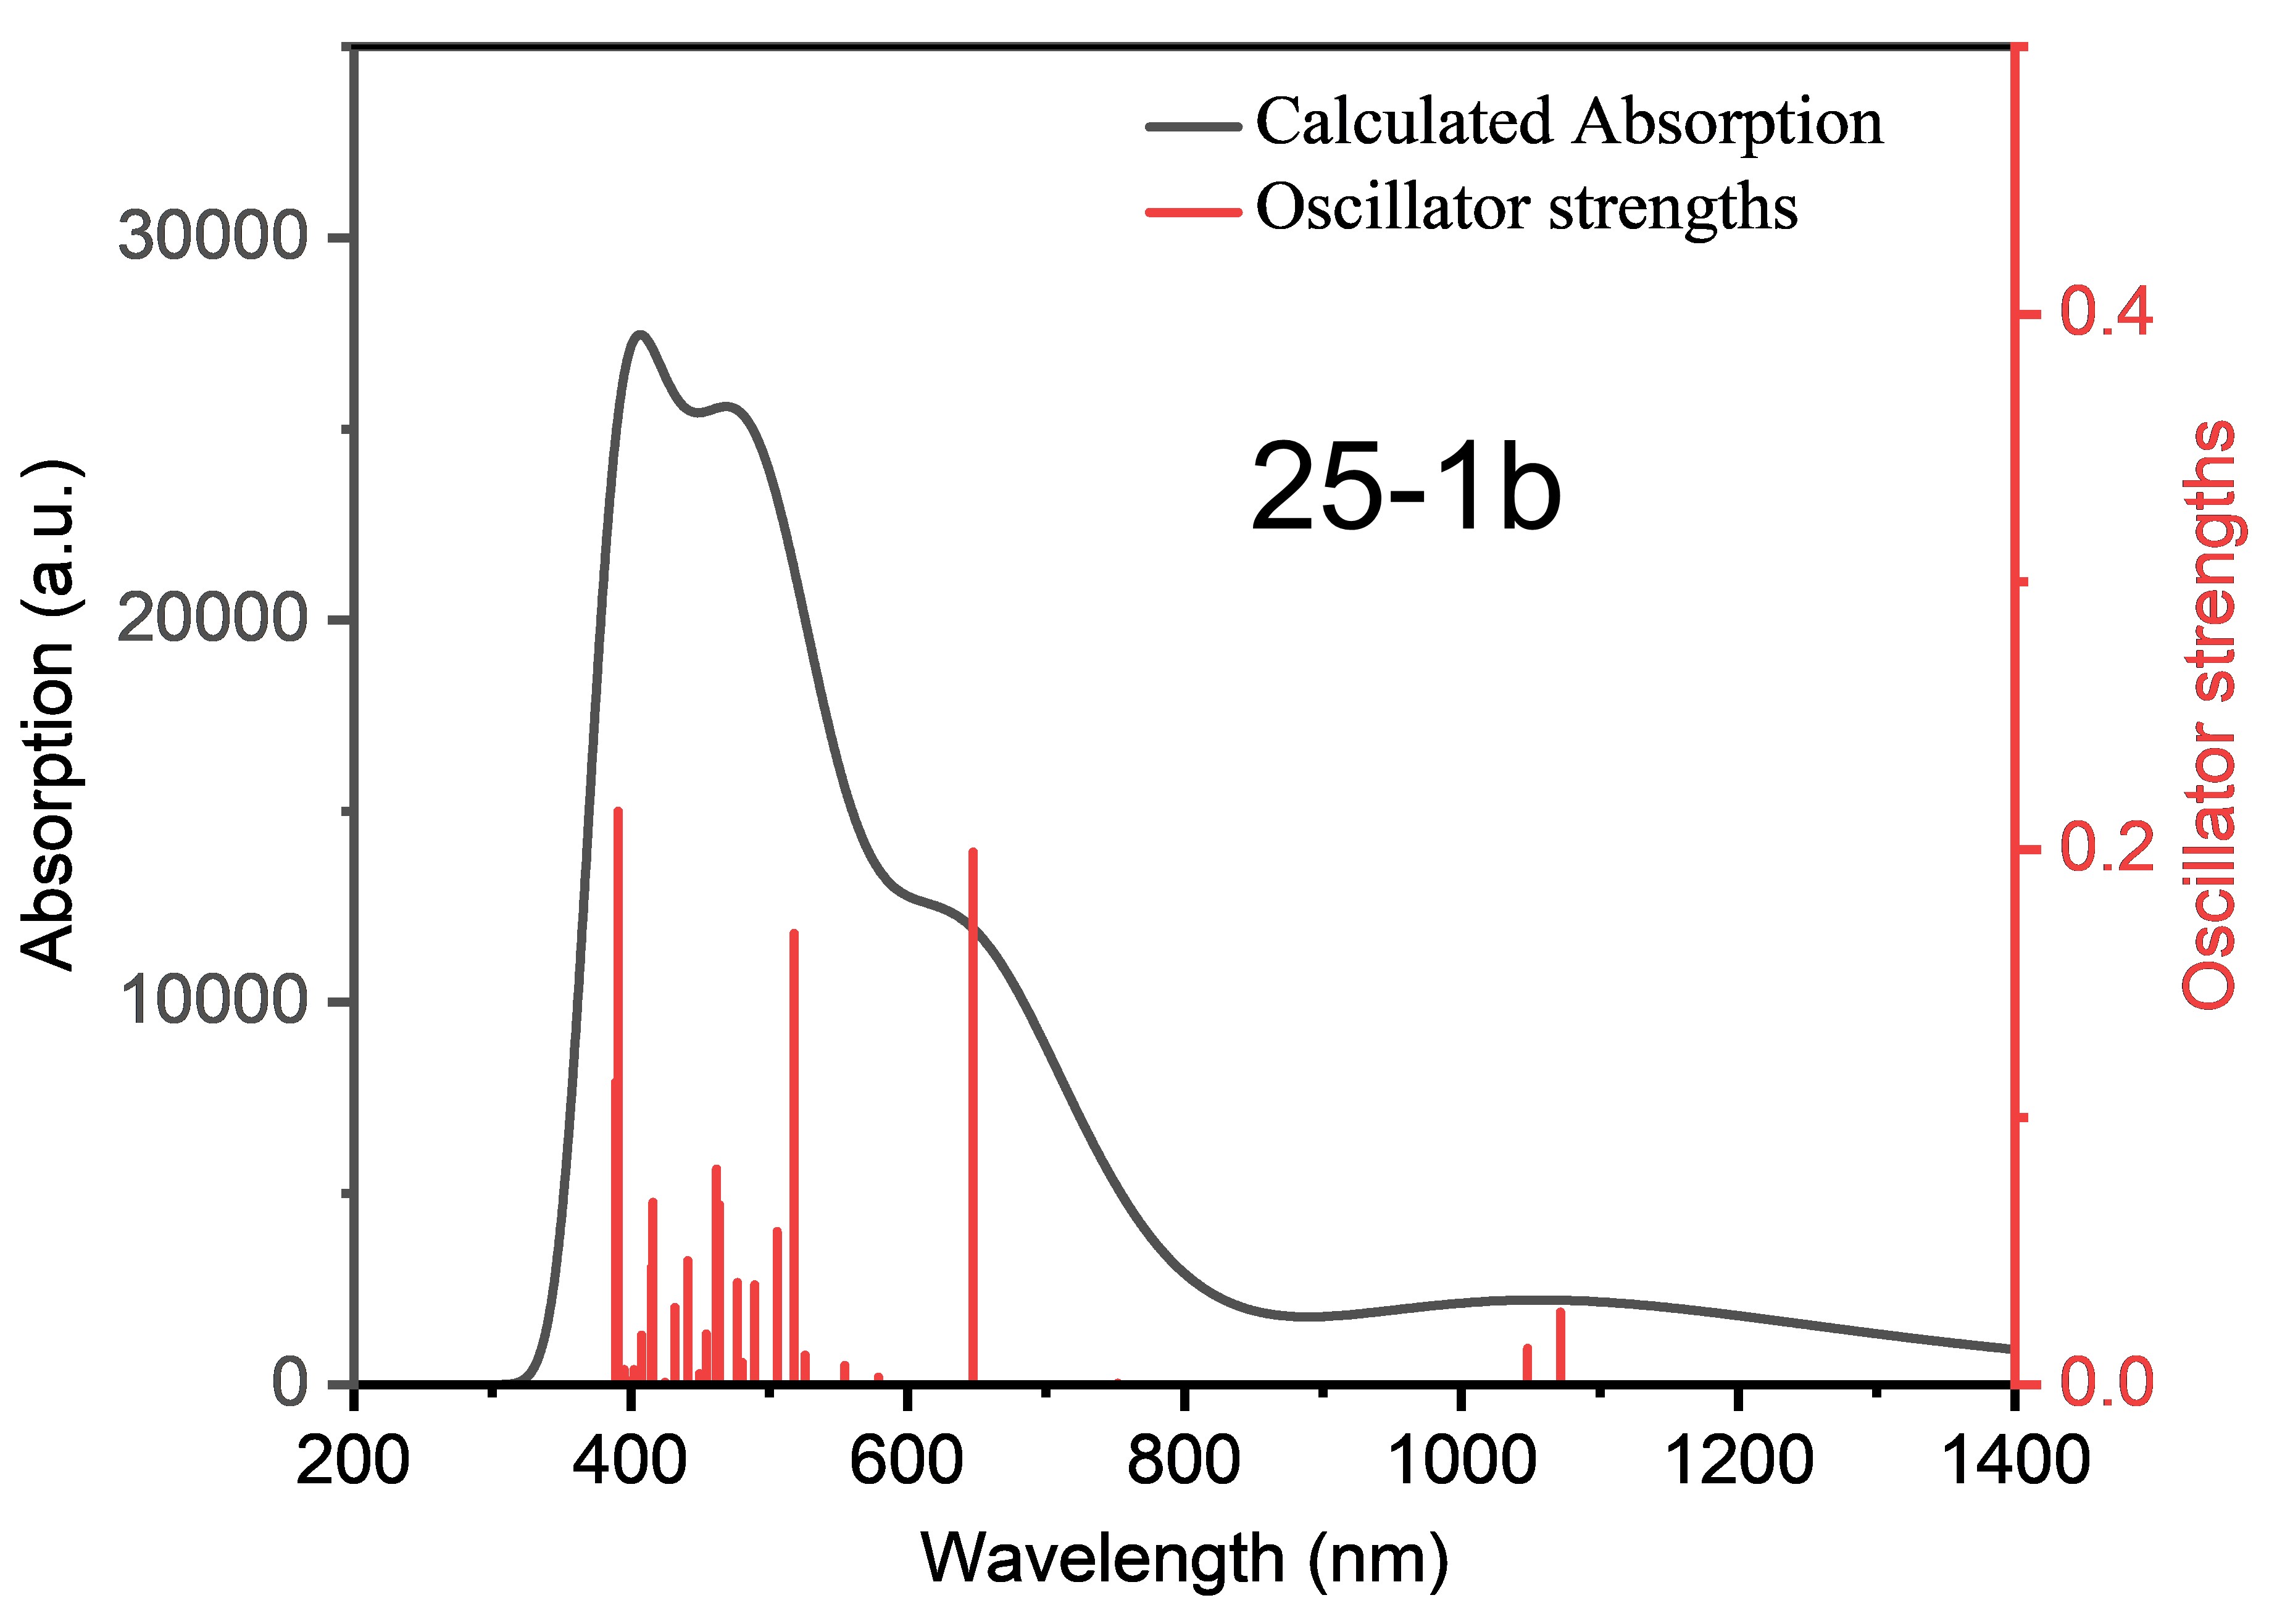


**Figure S50** Calculated UV-vis absorption spectra of the **25-1b** (triple state).

**Table S20** Excitation energies, oscillator strengths and orbital contribution of the S0 → Sn excitations of **25-1b** calculated at the TD-UB3LYP-D3(BJ)/6-31G(d,p) level of theory.

| transition | energy [eV] | energy [nm] | oscillator  strength | orbital contribution | |
| --- | --- | --- | --- | --- | --- |
| S0 → S1 | 1.1569 | 1071.69 | 0.02710 | βH → βL | 88.9% |
| S0 → S2 | 1.1833 | 1047.78 | 0.01360 | αH → αL | 92.9% |
| S0 → S3 | 1.6492 | 751.78 | 0.00060 | βH-1 → βL  βH-2 → βL | 86.6%  7.0% |
| S0 → S4 | 1.9151 | 647.40 | 0.19910 | βH-2 → βL  βH-1 → βL | 77.6%  5.6% |
| S0 → S5 | 2.1414 | 578.99 | 0.00280 | αH → αL+1  αH-1 → αL  βH → βL+1 | 47.4%  19.1%  5.2% |
| S0 → S6 | 2.2352 | 554.69 | 0.00720 | αH-1 → αL  αH → αL+1 | 39.0%  36.2% |
| S0 → S7 | 2.3581 | 525.78 | 0.01100 | βH-3 → βL | 79.0% |
| S0 → S8 | 2.3942 | 517.85 | 0.16860 | βH → βL+1  αH-1 → αL  βH-1 → βL+1 | 46.3%  14.3%  11.2% |
| S0 → S9 | 2.4516 | 505.73 | 0.05730 | αH → αL+2  αH-1 → αL  βH-2 → βL+1  αH-3 → αL  αH-1 → αL+1  βH-1 → βL+1  βH → βL+1  βH-1 → βL+2 | 18.7%  9.6%  8.6%  8.4%  7.8%  7.0%  5.8%  5.3% |
| S0 → S10 | 2.5323 | 489.61 | 0.03730 | αH → αL+2  βH → βL+1  βH-1 → βL+2  βH-5 → βL | 38.1%  14.7%  7.5%  6.1% |


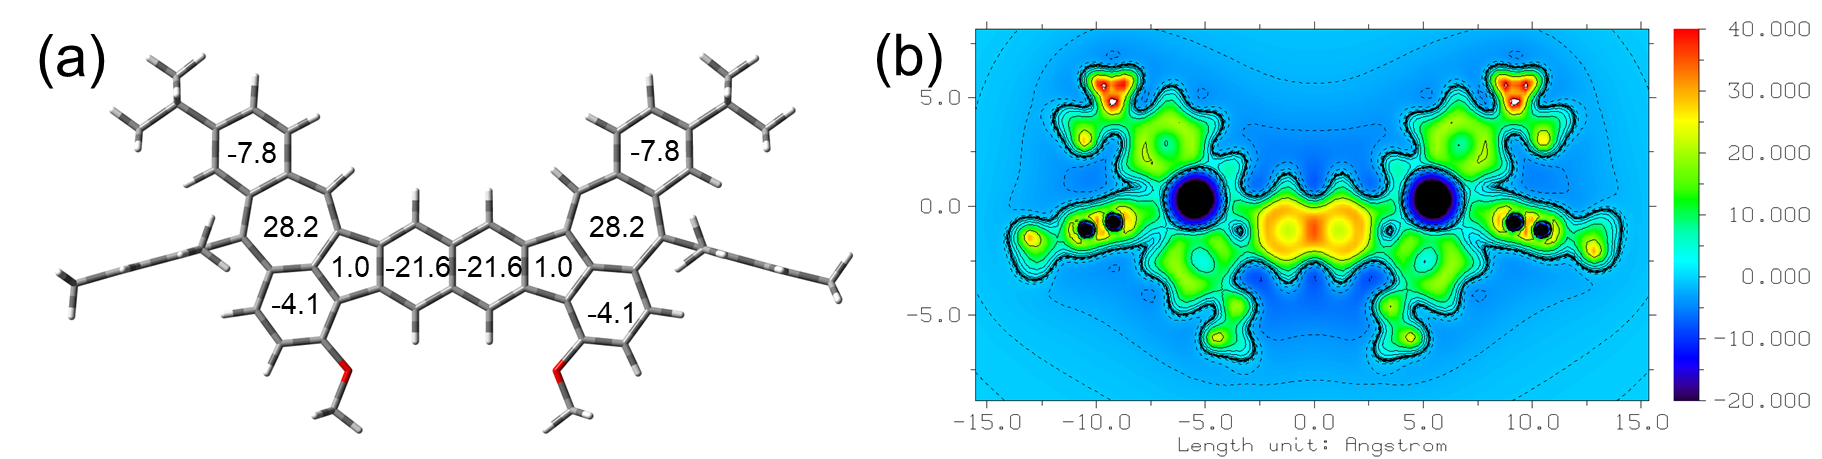


**Figure S51** The aromaticity calculation of compound **25-2b**. (a) **Nucleus-independent chemical shift (NICS) values and** (b) the isotropic chemical shielding surface (ICSS) maps based on DFT U**B3LYP/6-31G(d,p) level.**


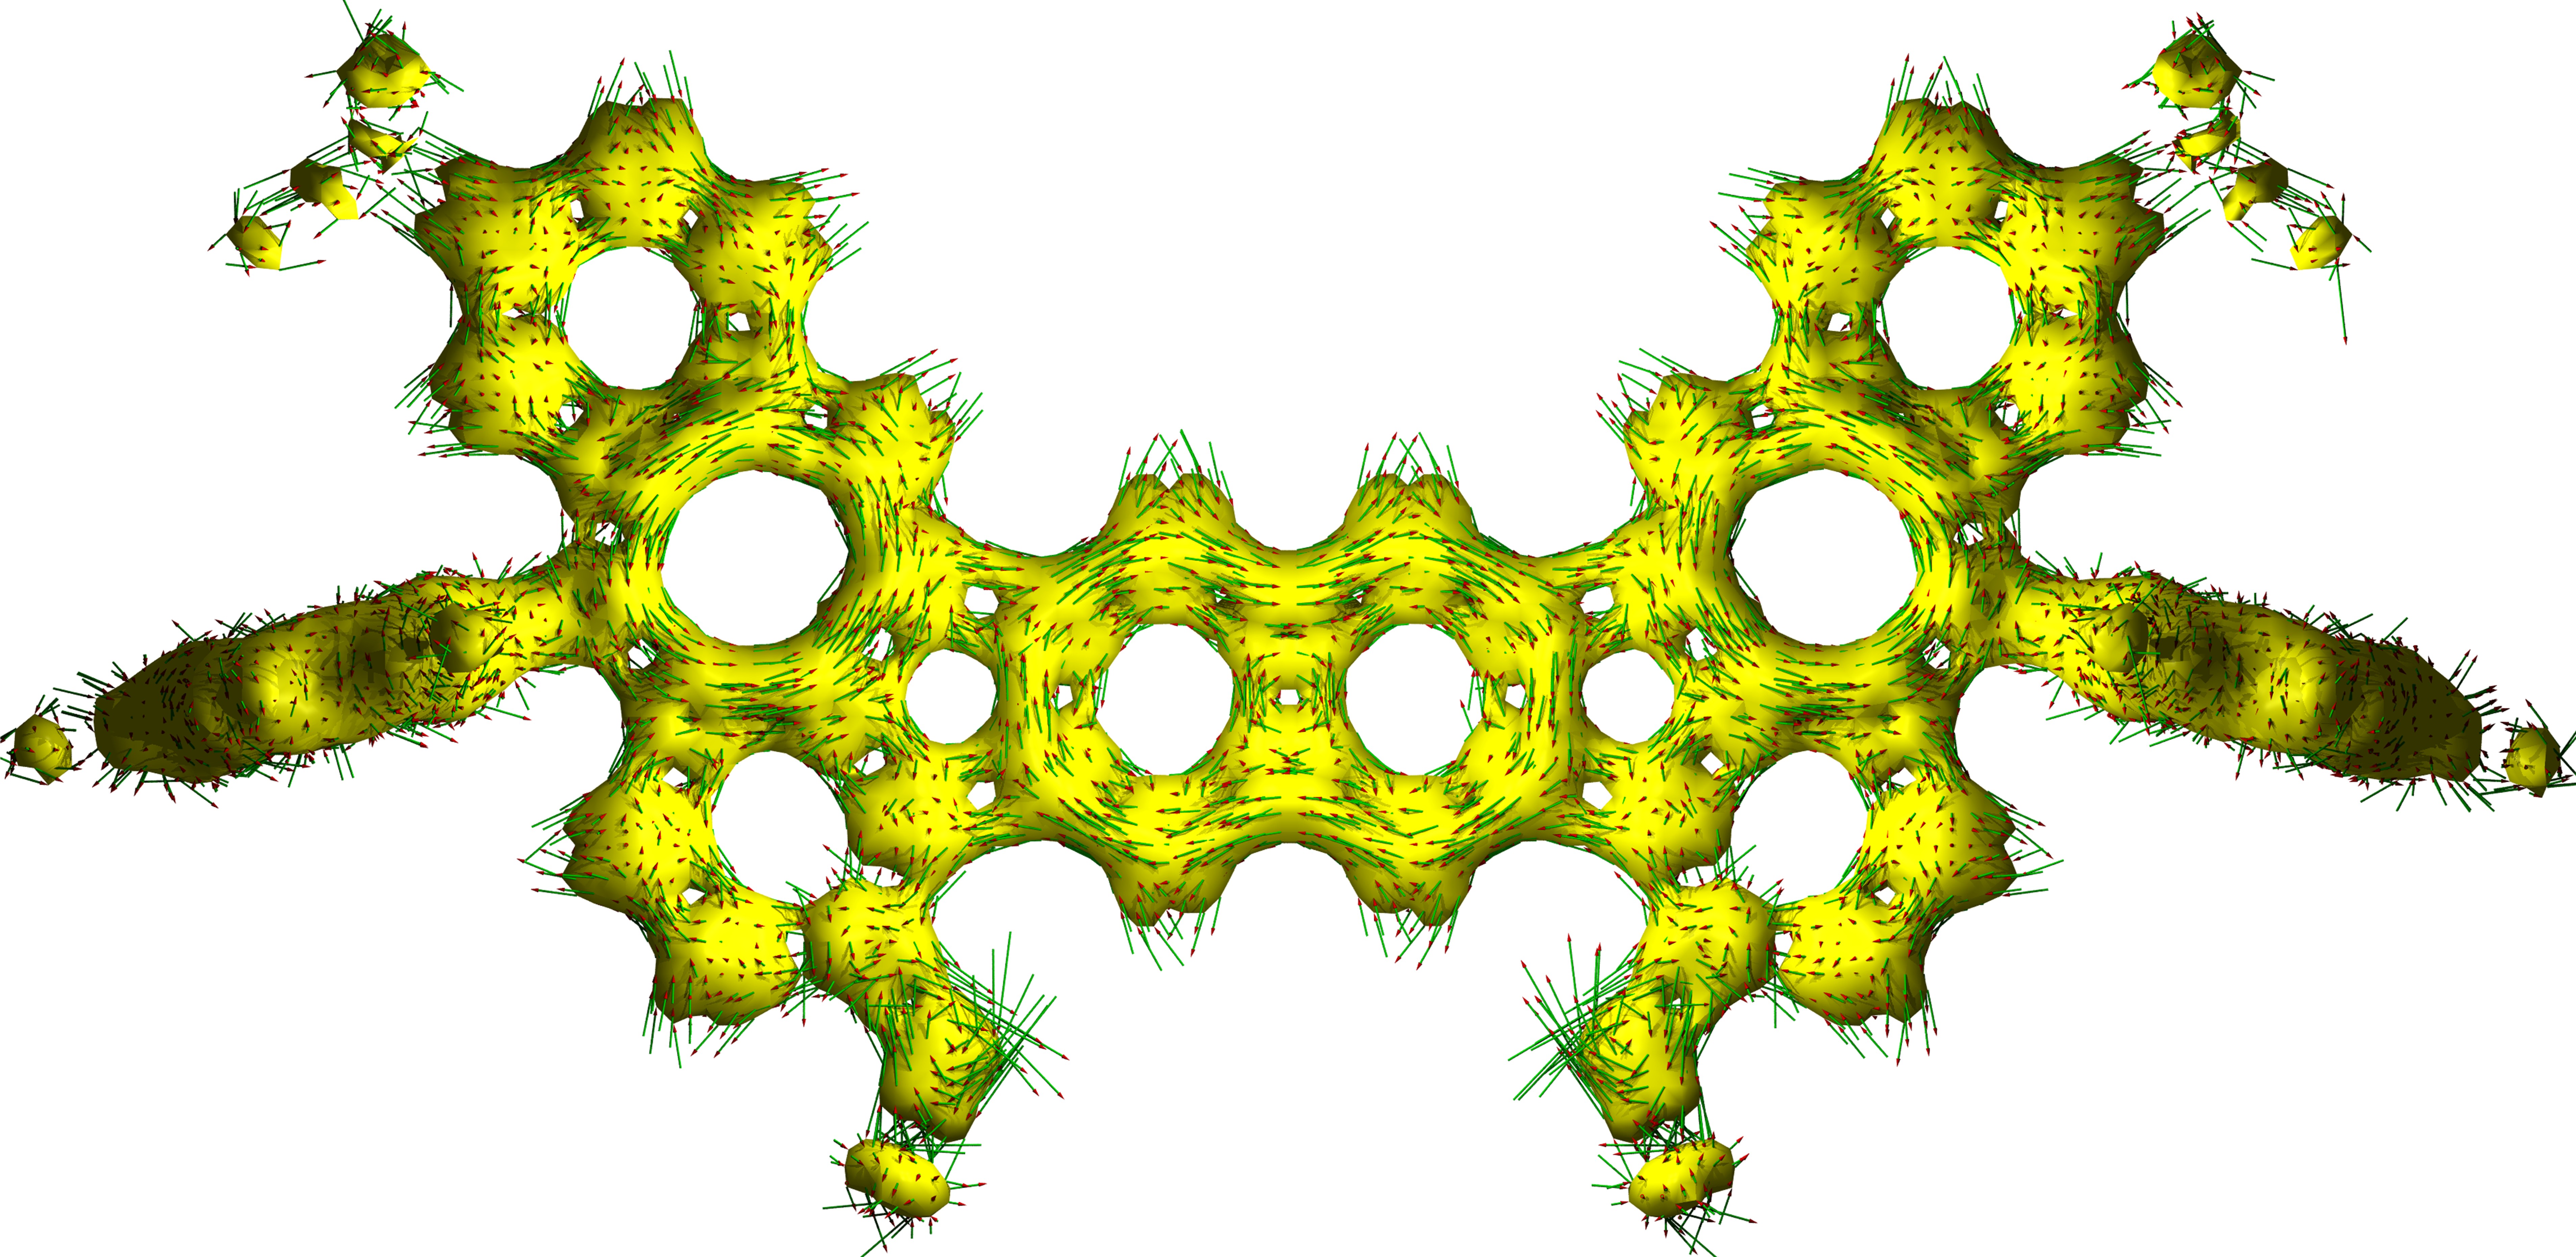


**Figure S52** The aromaticity calculation of compound **25-2b**. **The calculated** anisotropy of the induced current density (ACID) plots based on DFT U**B3LYP/6-31G(d,p) level.**


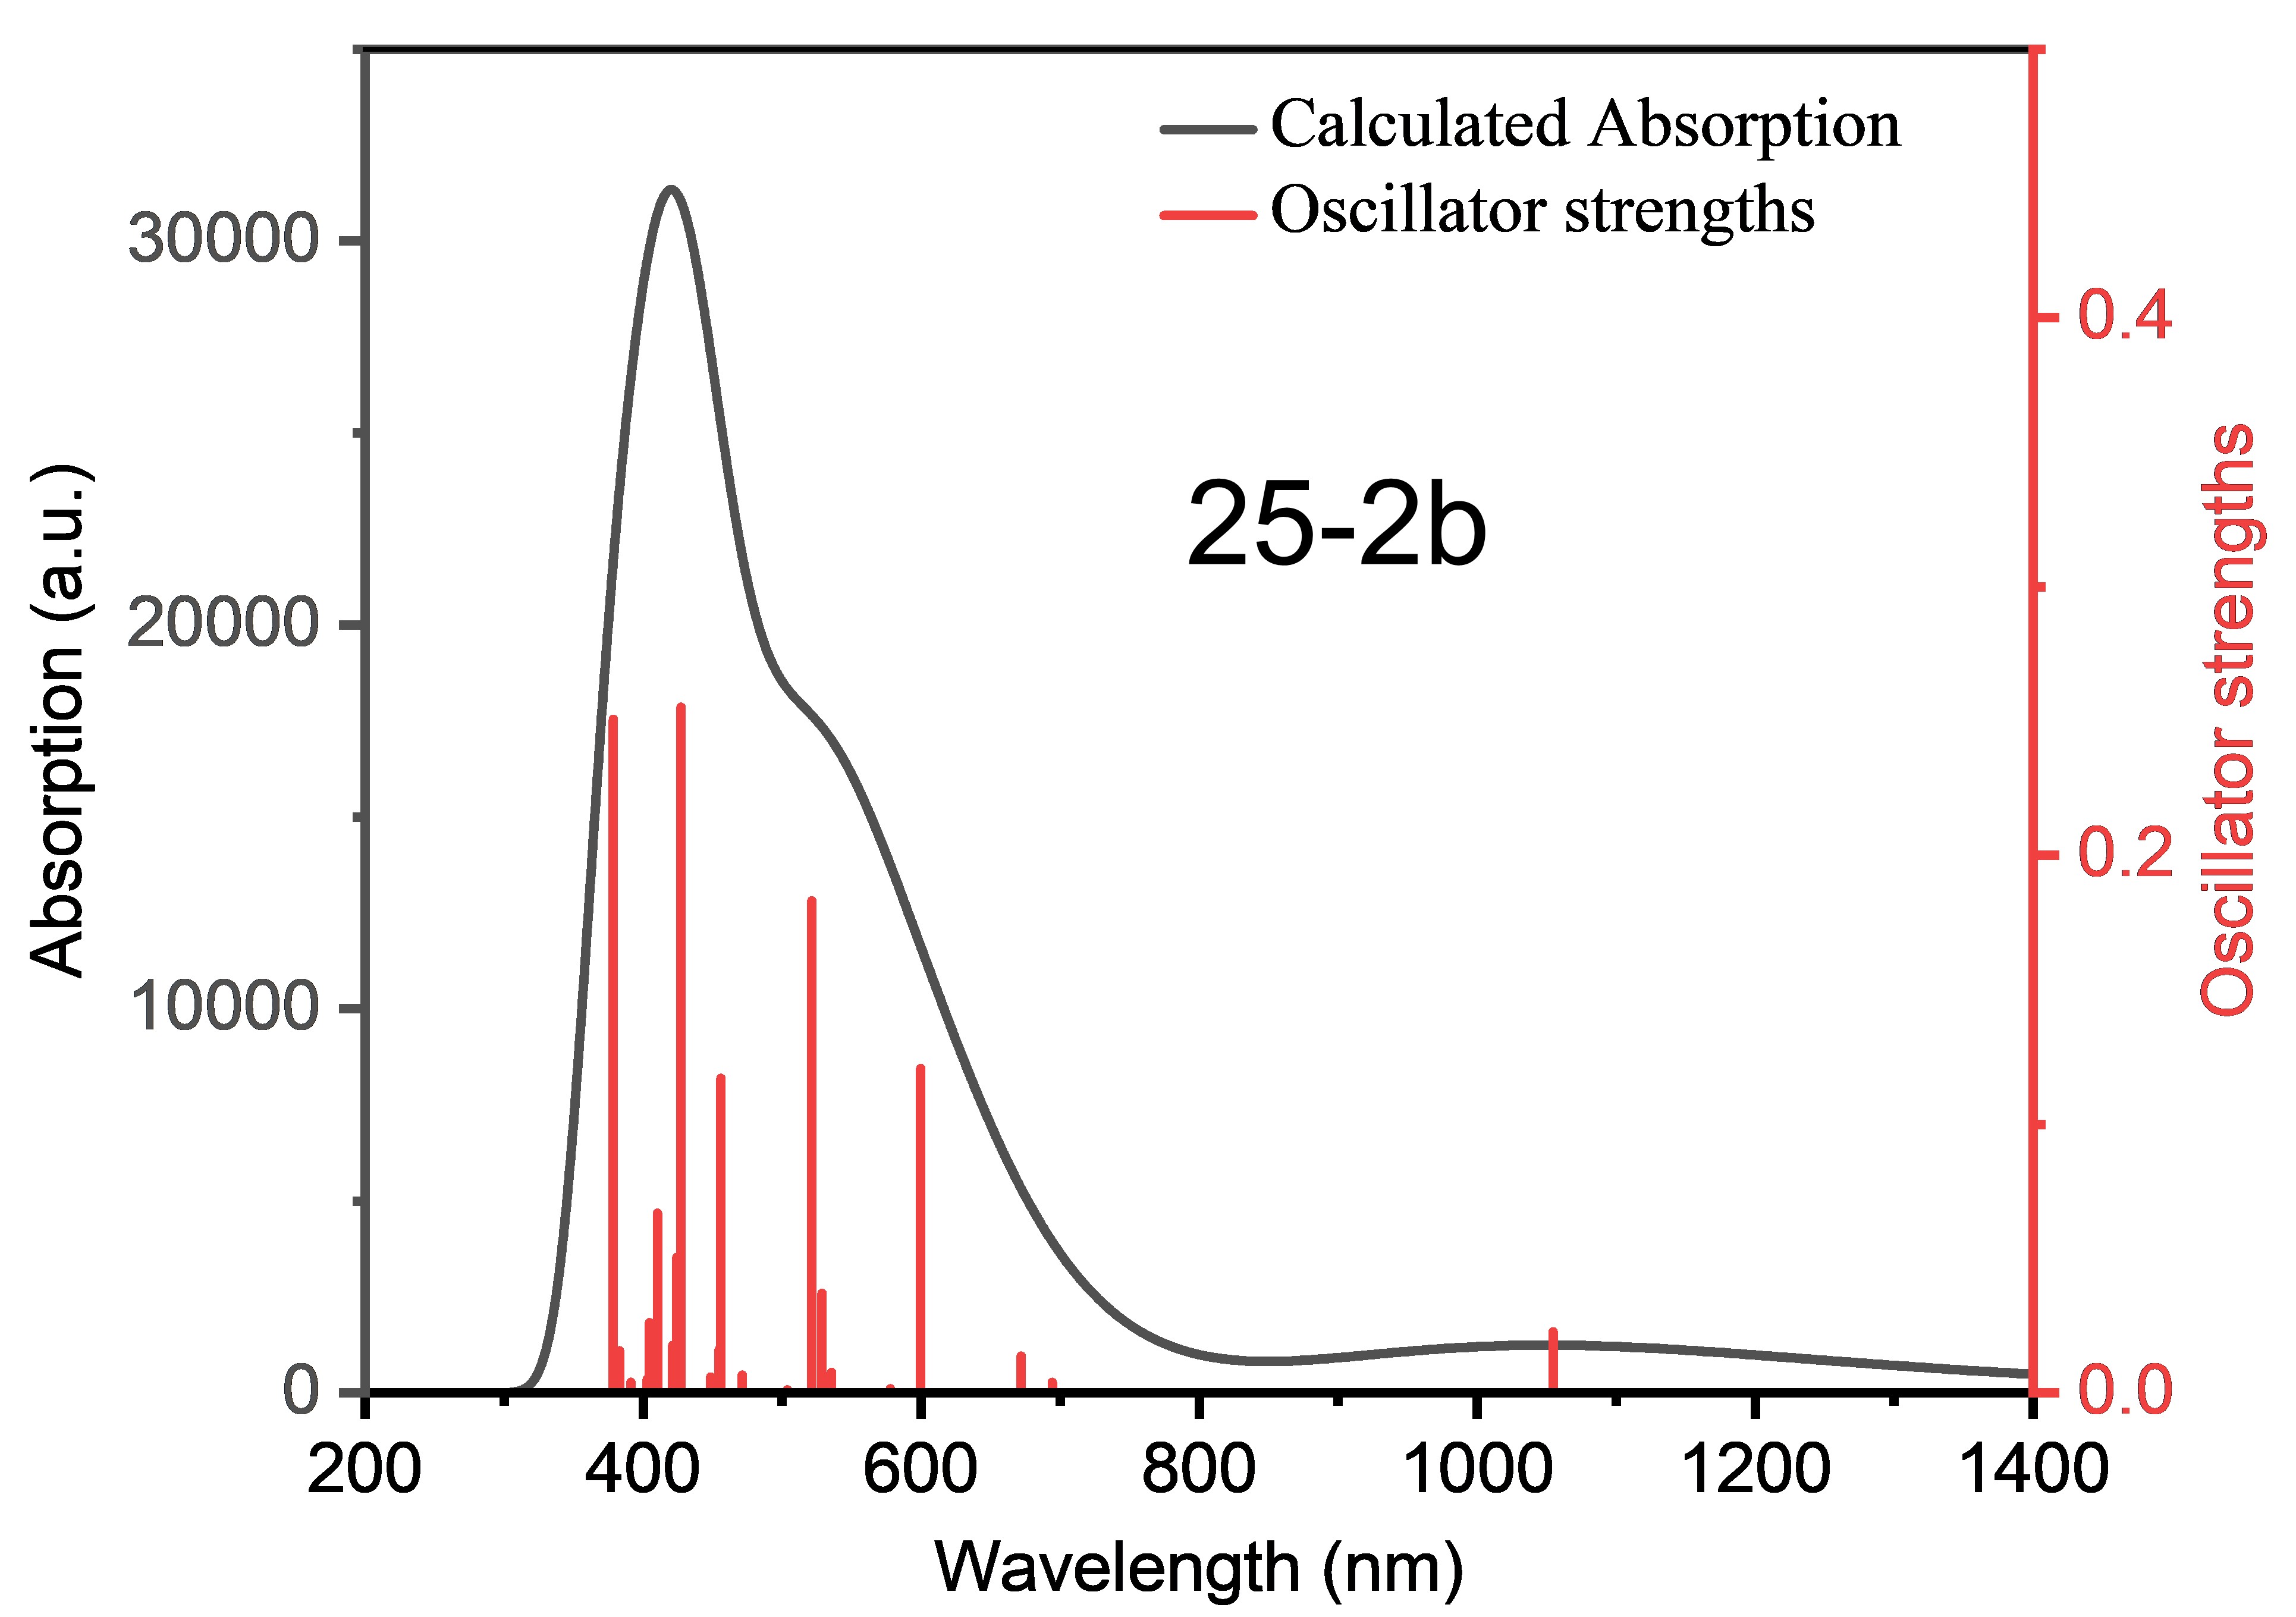


**Figure S53** Calculated UV-vis absorption spectra of the **25-2b** (triple state).

**Table S21** Excitation energies, oscillator strengths and orbital contribution of the S0 → Sn excitations of **25-2b** calculated at the TD-UB3LYP-D3(BJ)/6-31G(d,p) level of theory.

| transition | energy [eV] | energy [nm] | oscillator  strength | orbital contribution | |
| --- | --- | --- | --- | --- | --- |
| S0 → S1 | 1.1755 | 1054.74 | 0.02280 | αH → αL  αH-1 → αL+1 | 67.2%  26.9% |
| S0 → S2 | 1.2040 | 1029.77 | 0.00010 | αH-1 → αL  αH → αL+1 | 52.9%  41.2% |
| S0 → S3 | 1.7859 | 694.24 | 0.00390 | αH → αL+1  αH-1 → αL | 49.0%  40.8% |
| S0 → S4 | 1.8455 | 671.82 | 0.01370 | αH-1 → αL+1  αH → αL | 67.8%  26.6% |
| S0 → S5 | 2.0676 | 599.65 | 0.12070 | βH → βL  αH-2 → αL  βH → βL+2  αH-1 → αL+2 | 67.9%  9.9%  5.5%  5.5% |
| S0 → S6 | 2.1458 | 577.80 | 0.00160 | αH → αL+2  βH → βL+3  αH-2 → αL+1  βH-1 → βL  βH → βL+4  αH-2 → αL+2 | 17.7%  16.0%  14.5%  9.7%  7.1%  5.5% |
| S0 → S7 | 2.2525 | 550.43 | 0.00010 | αH → αL+2  βH → βL+1  βH-1 → βL | 40.3%  21.4%  16.7% |
| S0 → S8 | 2.3159 | 535.36 | 0.00760 | βH → βL+1  αH → αL+2  βH-2 → βL | 55.7%  25.0%  5.4% |
| S0 → S9 | 2.3453 | 528.65 | 0.03710 | αH-1 → αL+2  βH → βL+2  αH-2 → αL  αH → αL | 54.5%  19.5%  8.1%  5.2% |
| S0 → S10 | 2.3788 | 521.20 | 0.18310 | αH-1 → αL+2  βH → βL  βH → βL+2  αH-2 → αL | 24.1%  23.3%  23.2%  18.0% |


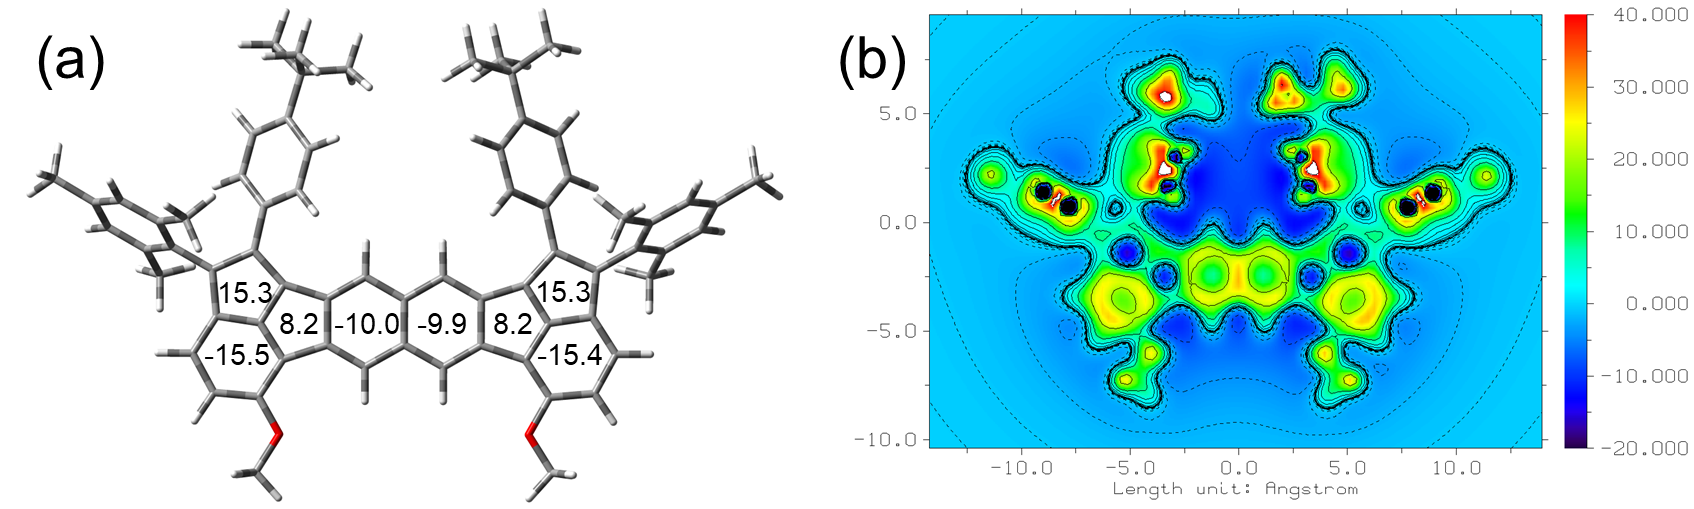


**Figure S54** The aromaticity calculation of compound **25-3b**. (a) **Nucleus-independent chemical shift (NICS) values and (b)** (b) the isotropic chemical shielding surface (ICSS) maps based on DFT U**B3LYP/6-31G(d,p) level.**


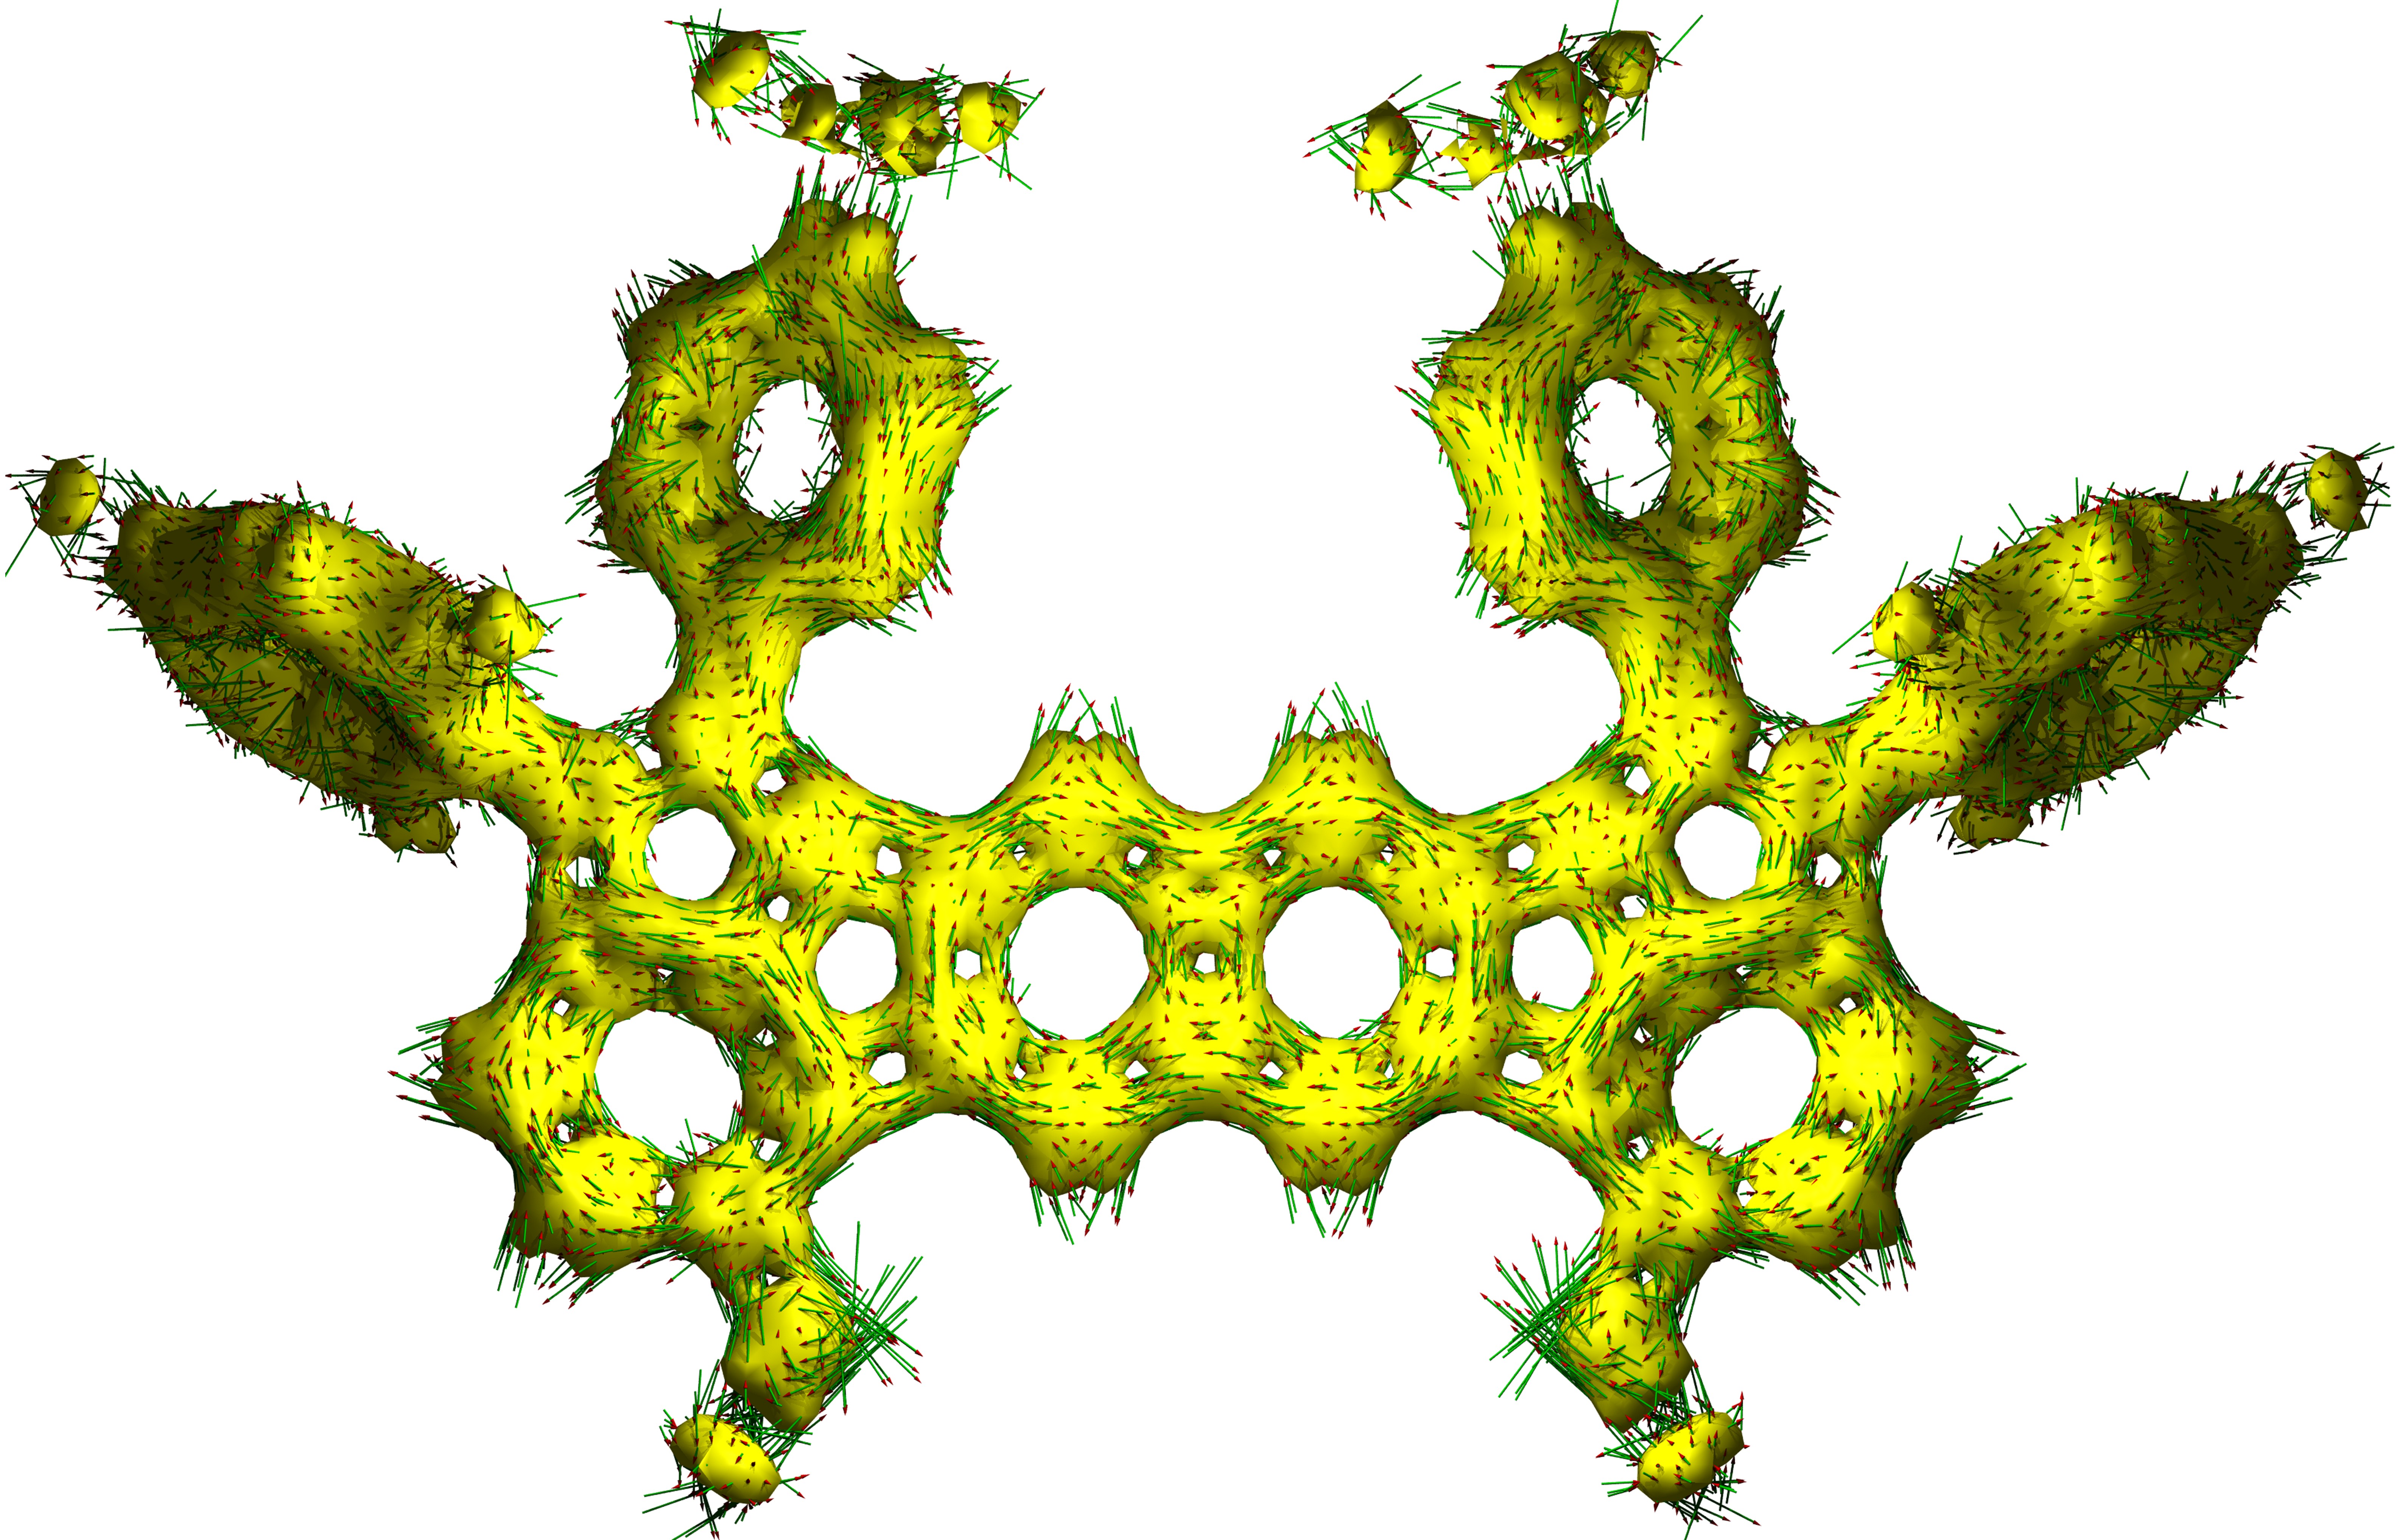


**Figure S55** The aromaticity calculation of compound **25-3b**. **The calculated** anisotropy of the induced current density (ACID) plots based on DFT U**B3LYP/6-31G(d,p) level.**


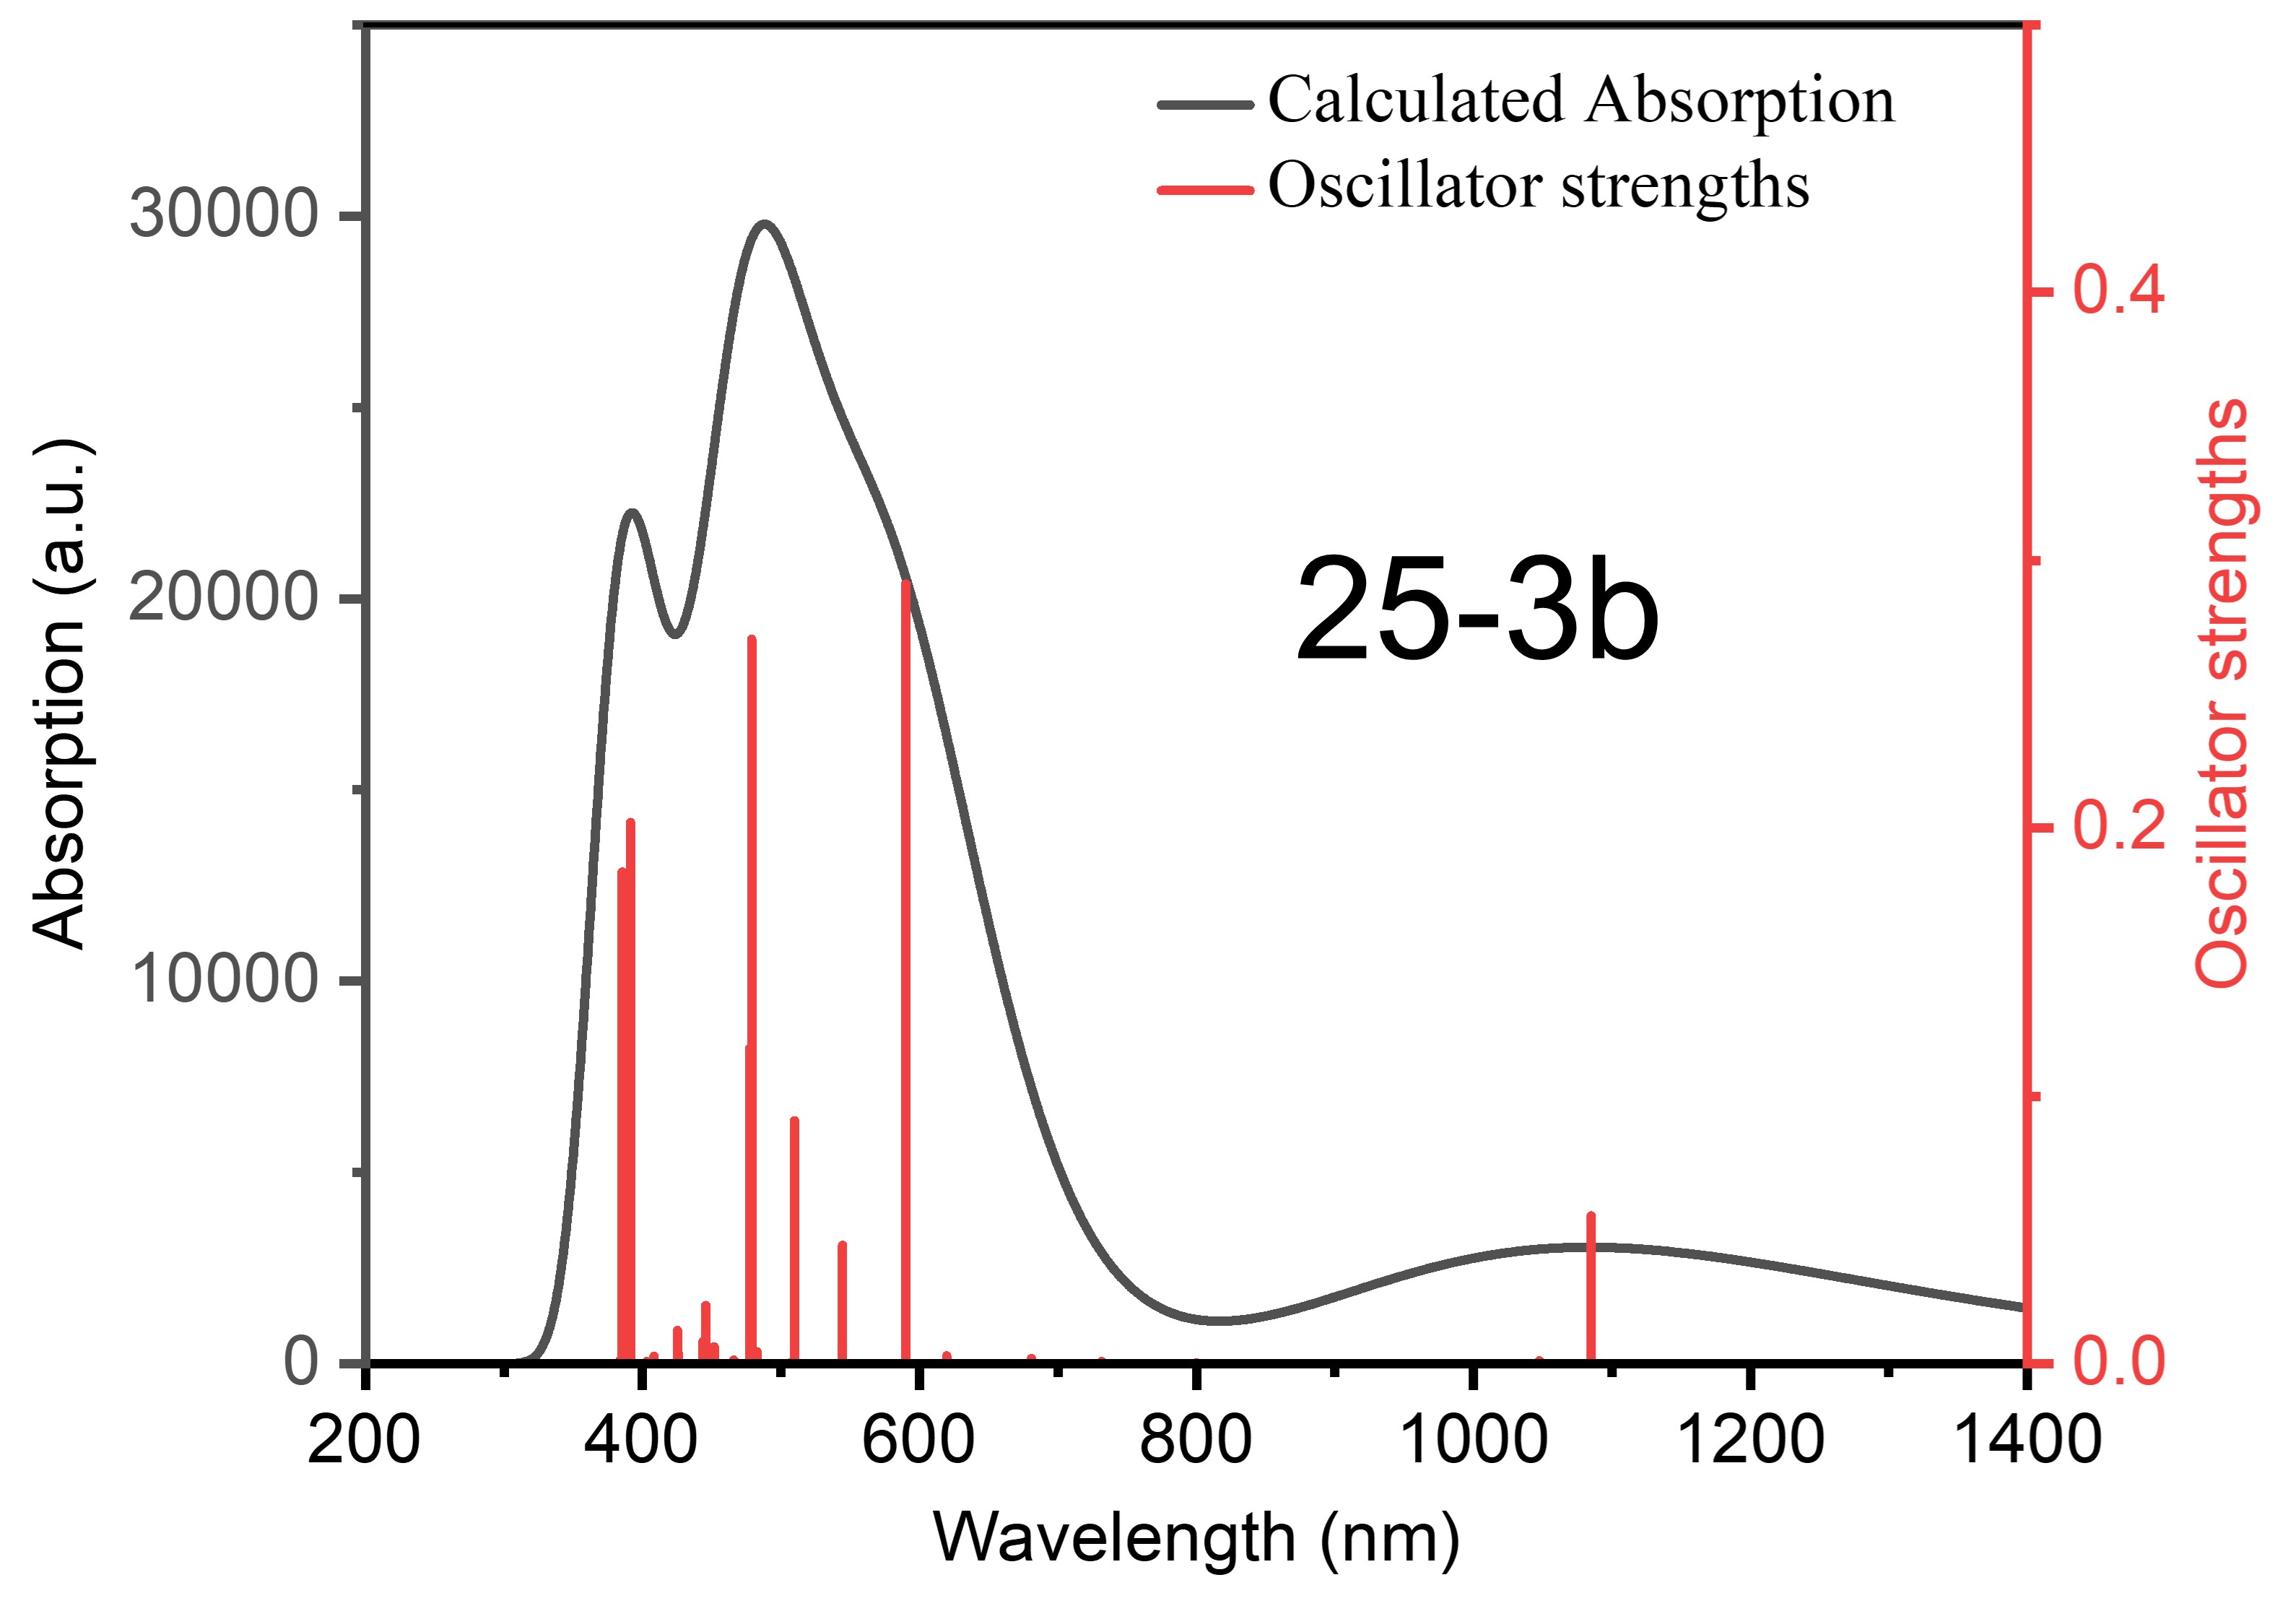


**Figure S56** Calculated UV-vis absorption spectra of the **25-3b** (triple state).

**Table S22** Excitation energies, oscillator strengths and orbital contribution of the S0 → Sn excitations of **25-3b** calculated at the TD-UB3LYP-D3(BJ)/6-31G(d,p) level of theory.

| transition | energy [eV] | energy [nm] | oscillator  strength | orbital contribution | |
| --- | --- | --- | --- | --- | --- |
| S0 → S1 | 1.1426 | 1085.11 | 0.05530 | βH → βL  βH-1 → βL+1 | 74.1%  19.7% |
| S0 → S2 | 1.1834 | 1047.69 | 0.00110 | βH-1 → βL  βH → βL+1 | 65.6%  29.0% |
| S0 → S3 | 1.5497 | 800.05 | 0.00040 | βH-2 → βL  βH → βL+1  βH-1 → βL | 52.9%  23.7%  19.5% |
| S0 → S4 | 1.6952 | 731.38 | 0.00080 | βH-1 → βL+1  βH → βL  βH-3 → βL  βH-2 → βL+1 | 64.8%  15.2%  10.6%  6.7% |
| S0 → S5 | 1.8205 | 681.04 | 0.00200 | βH → βL+1  βH-2 → βL  βH-1 → βL | 43.7%  40.8%  11.7% |
| S0 → S6 | 2.0004 | 619.80 | 0.00300 | βH-3 → βL  βH-2 → βL+1  βH-1 → βL+1  βH → βL | 42.6%  33.3%  11.5%  7.1% |
| S0 → S7 | 2.1008 | 590.18 | 0.29120 | βH-2 → βL+1  βH-3 → βL  αH → αL | 46.3%  35.5%  5.9% |
| S0 → S8 | 2.2774 | 544.41 | 0.04430 | βH-3 → βL+1  βH-4 → βL | 60.5%  23.4% |
| S0 → S9 | 2.4319 | 509.82 | 0.09080 | βH-5 → βL  βH-4 → βL+1  βH-7 → βL  αH → αL | 48.8%  23.2%  14.1%  7.0% |
| S0 → S10 | 2.4456 | 506.97 | 0.00040 | βH-4 → βL  βH-5 → βL+1  βH-3 → βL+1 | 55.0%  15.0%  14.8% |


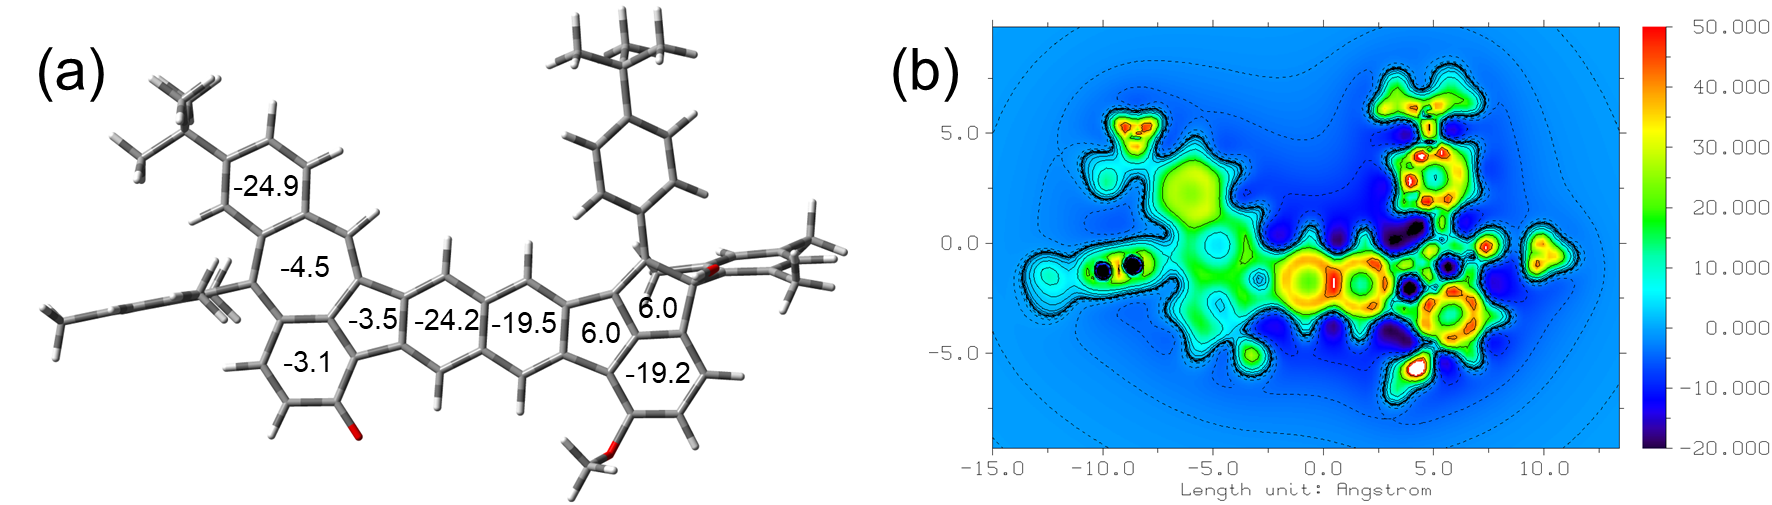


**Figure S57** The aromaticity calculation of compound **26-1b**. (a) **Nucleus-independent chemical shift (NICS) values and (b)** the isotropic chemical shielding surface (ICSS) maps based on DFT **B3LYP/6-31G(d,p) level.**


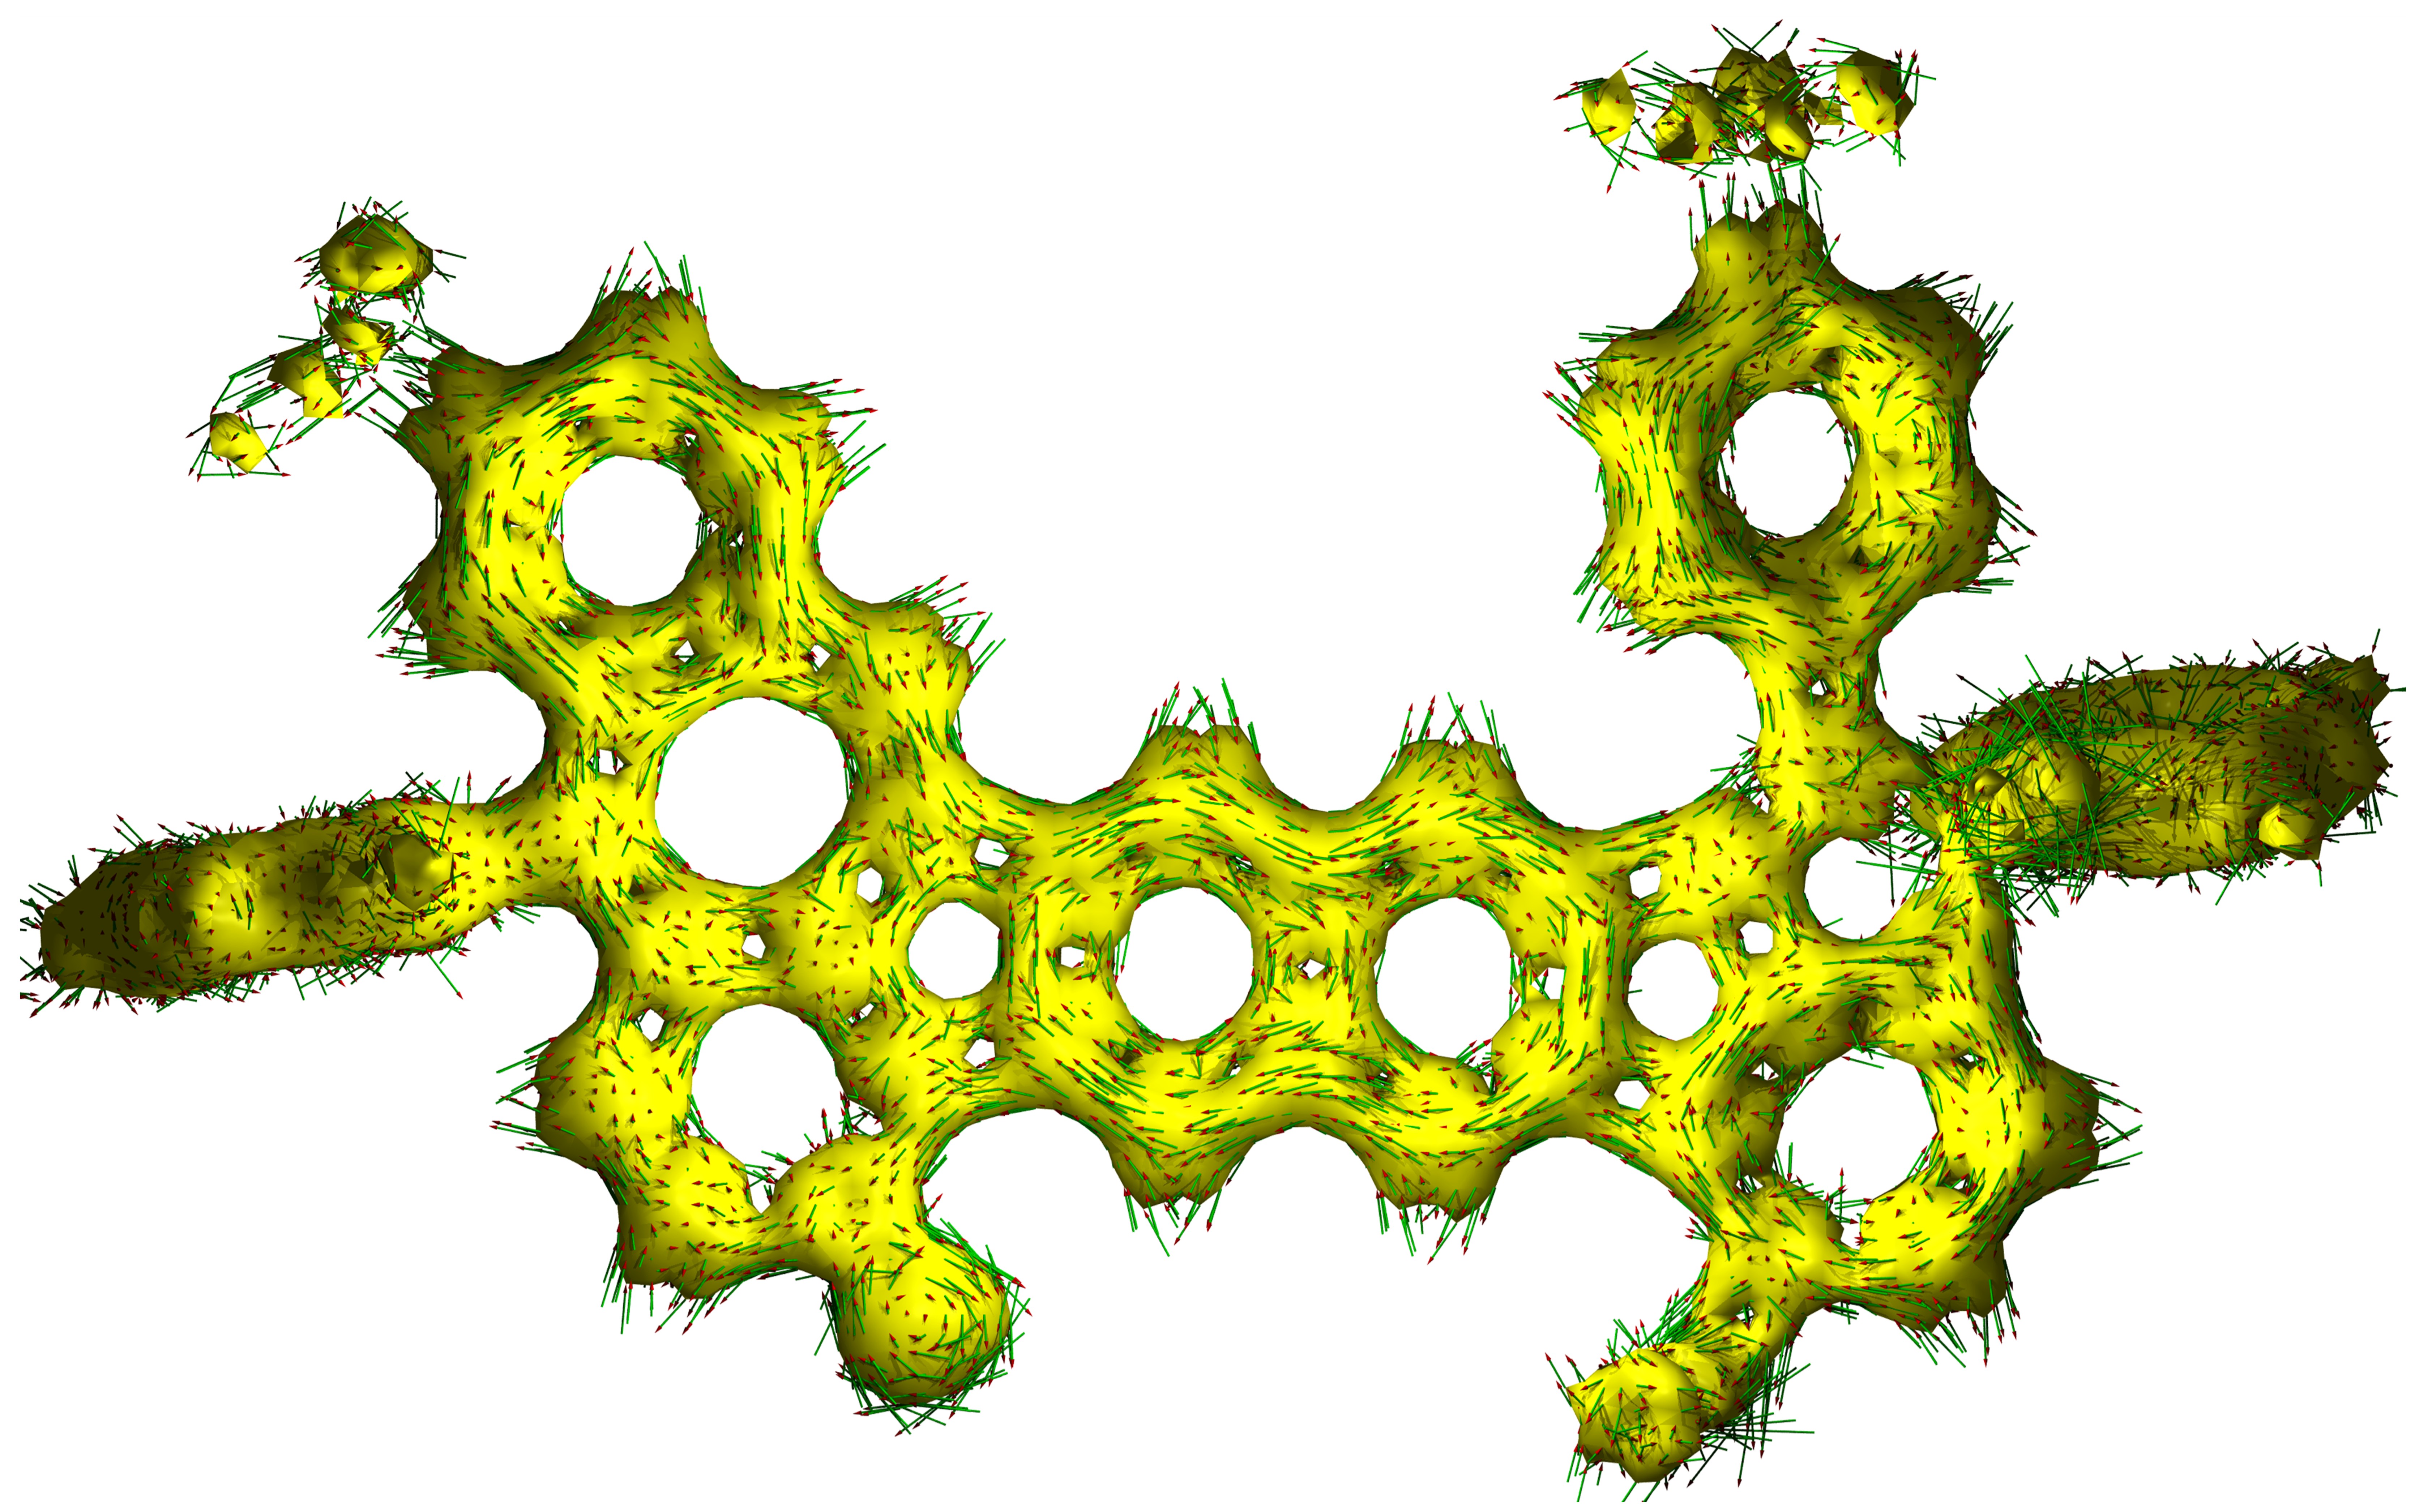


**Figure S58** The aromaticity calculation of compound **26-1b**. **The calculated** anisotropy of the induced current density (ACID) plots based on DFT **B3LYP/6-31G(d,p) level.**


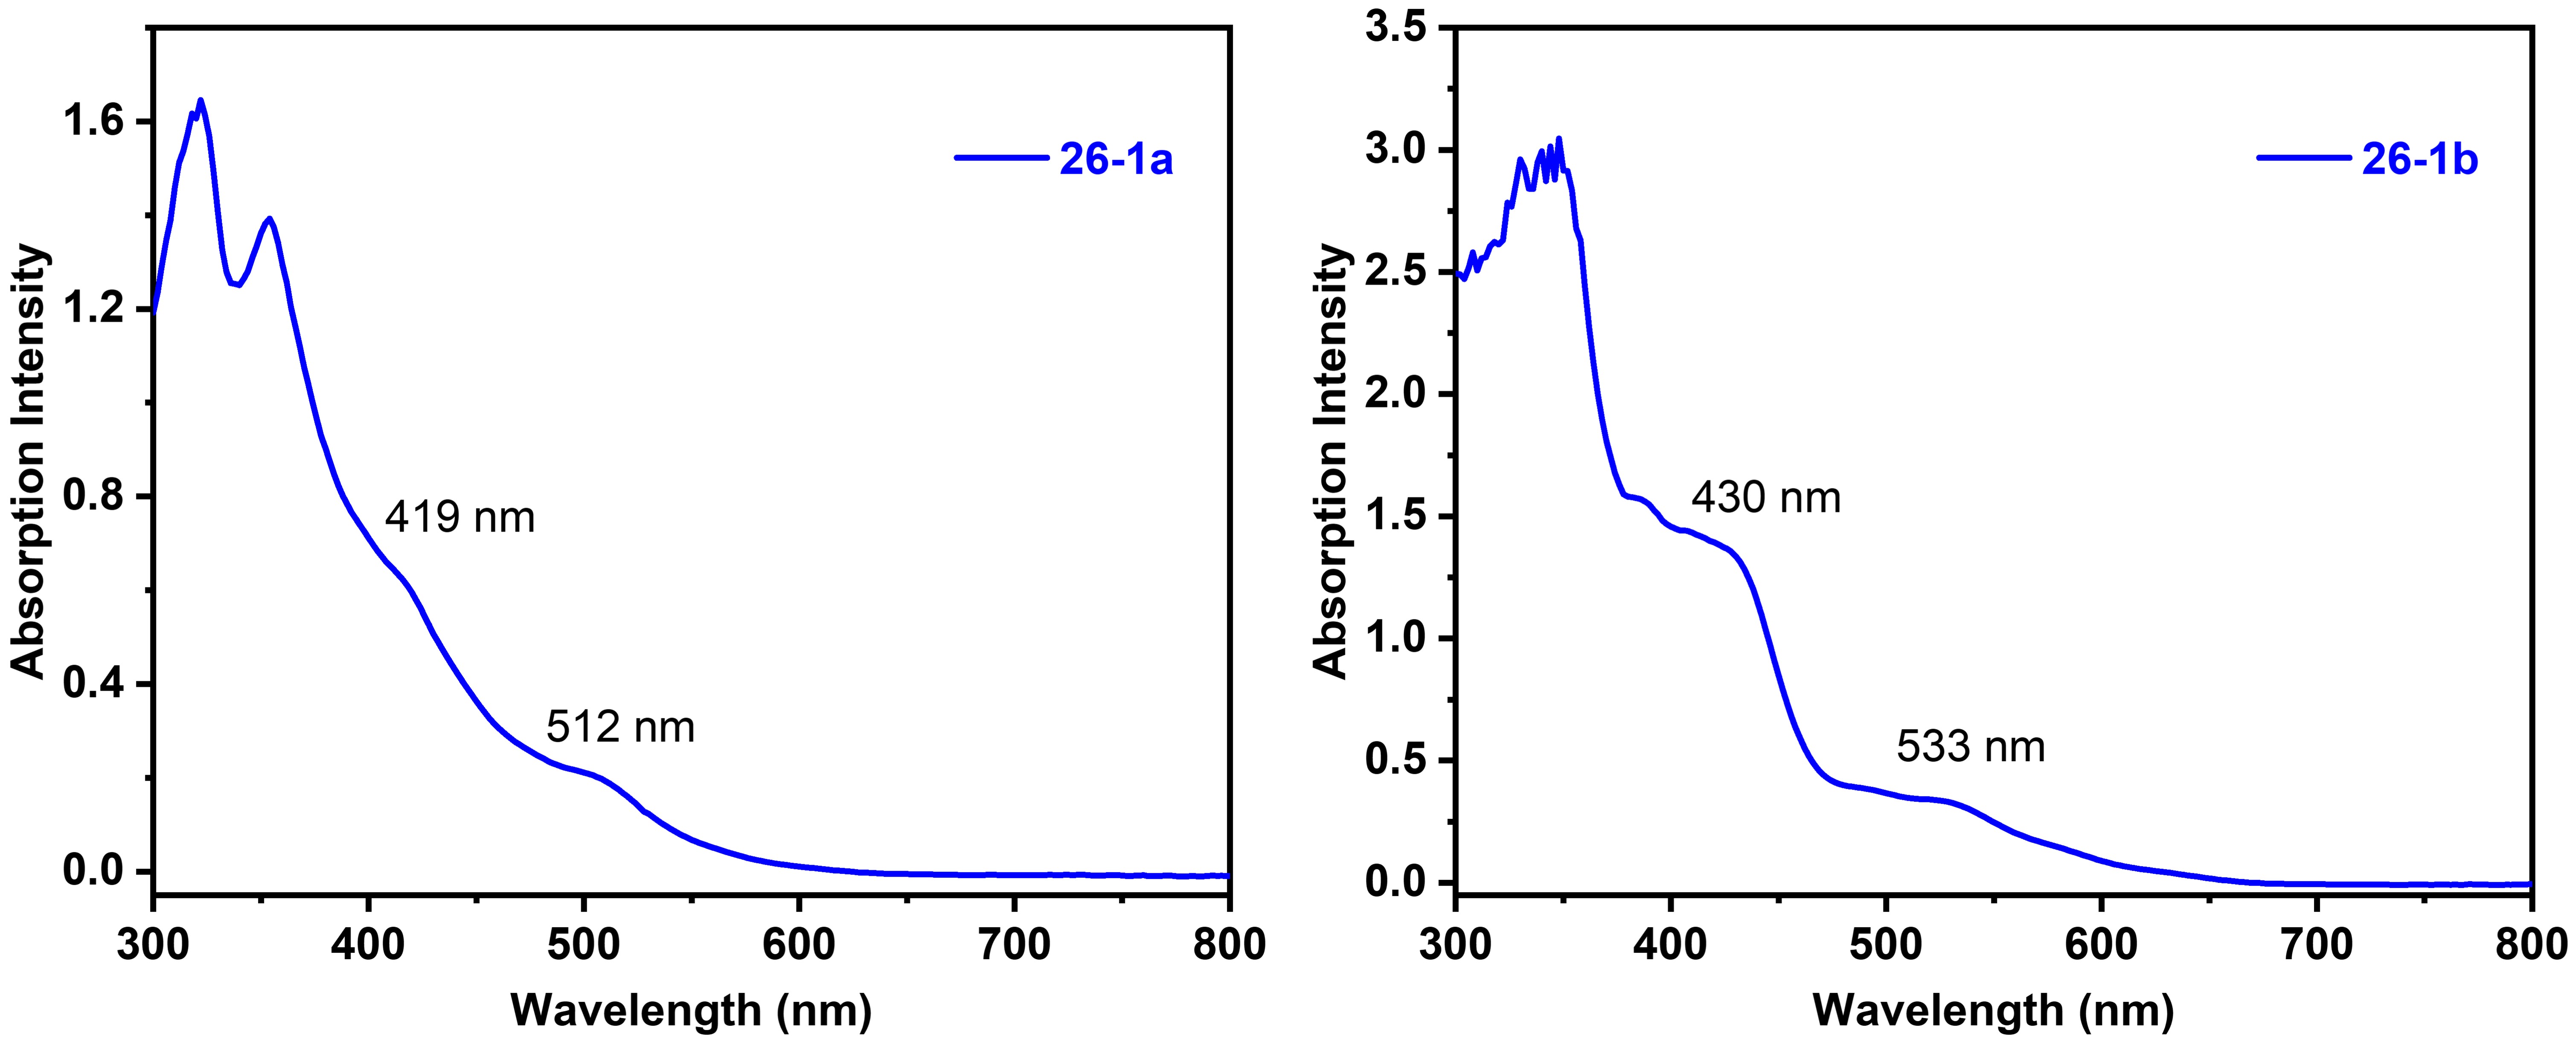


**Figure S59** UV-vis absorption spectrum of compound **26-1b** in dichloromethane solution (10-5 mol/L).


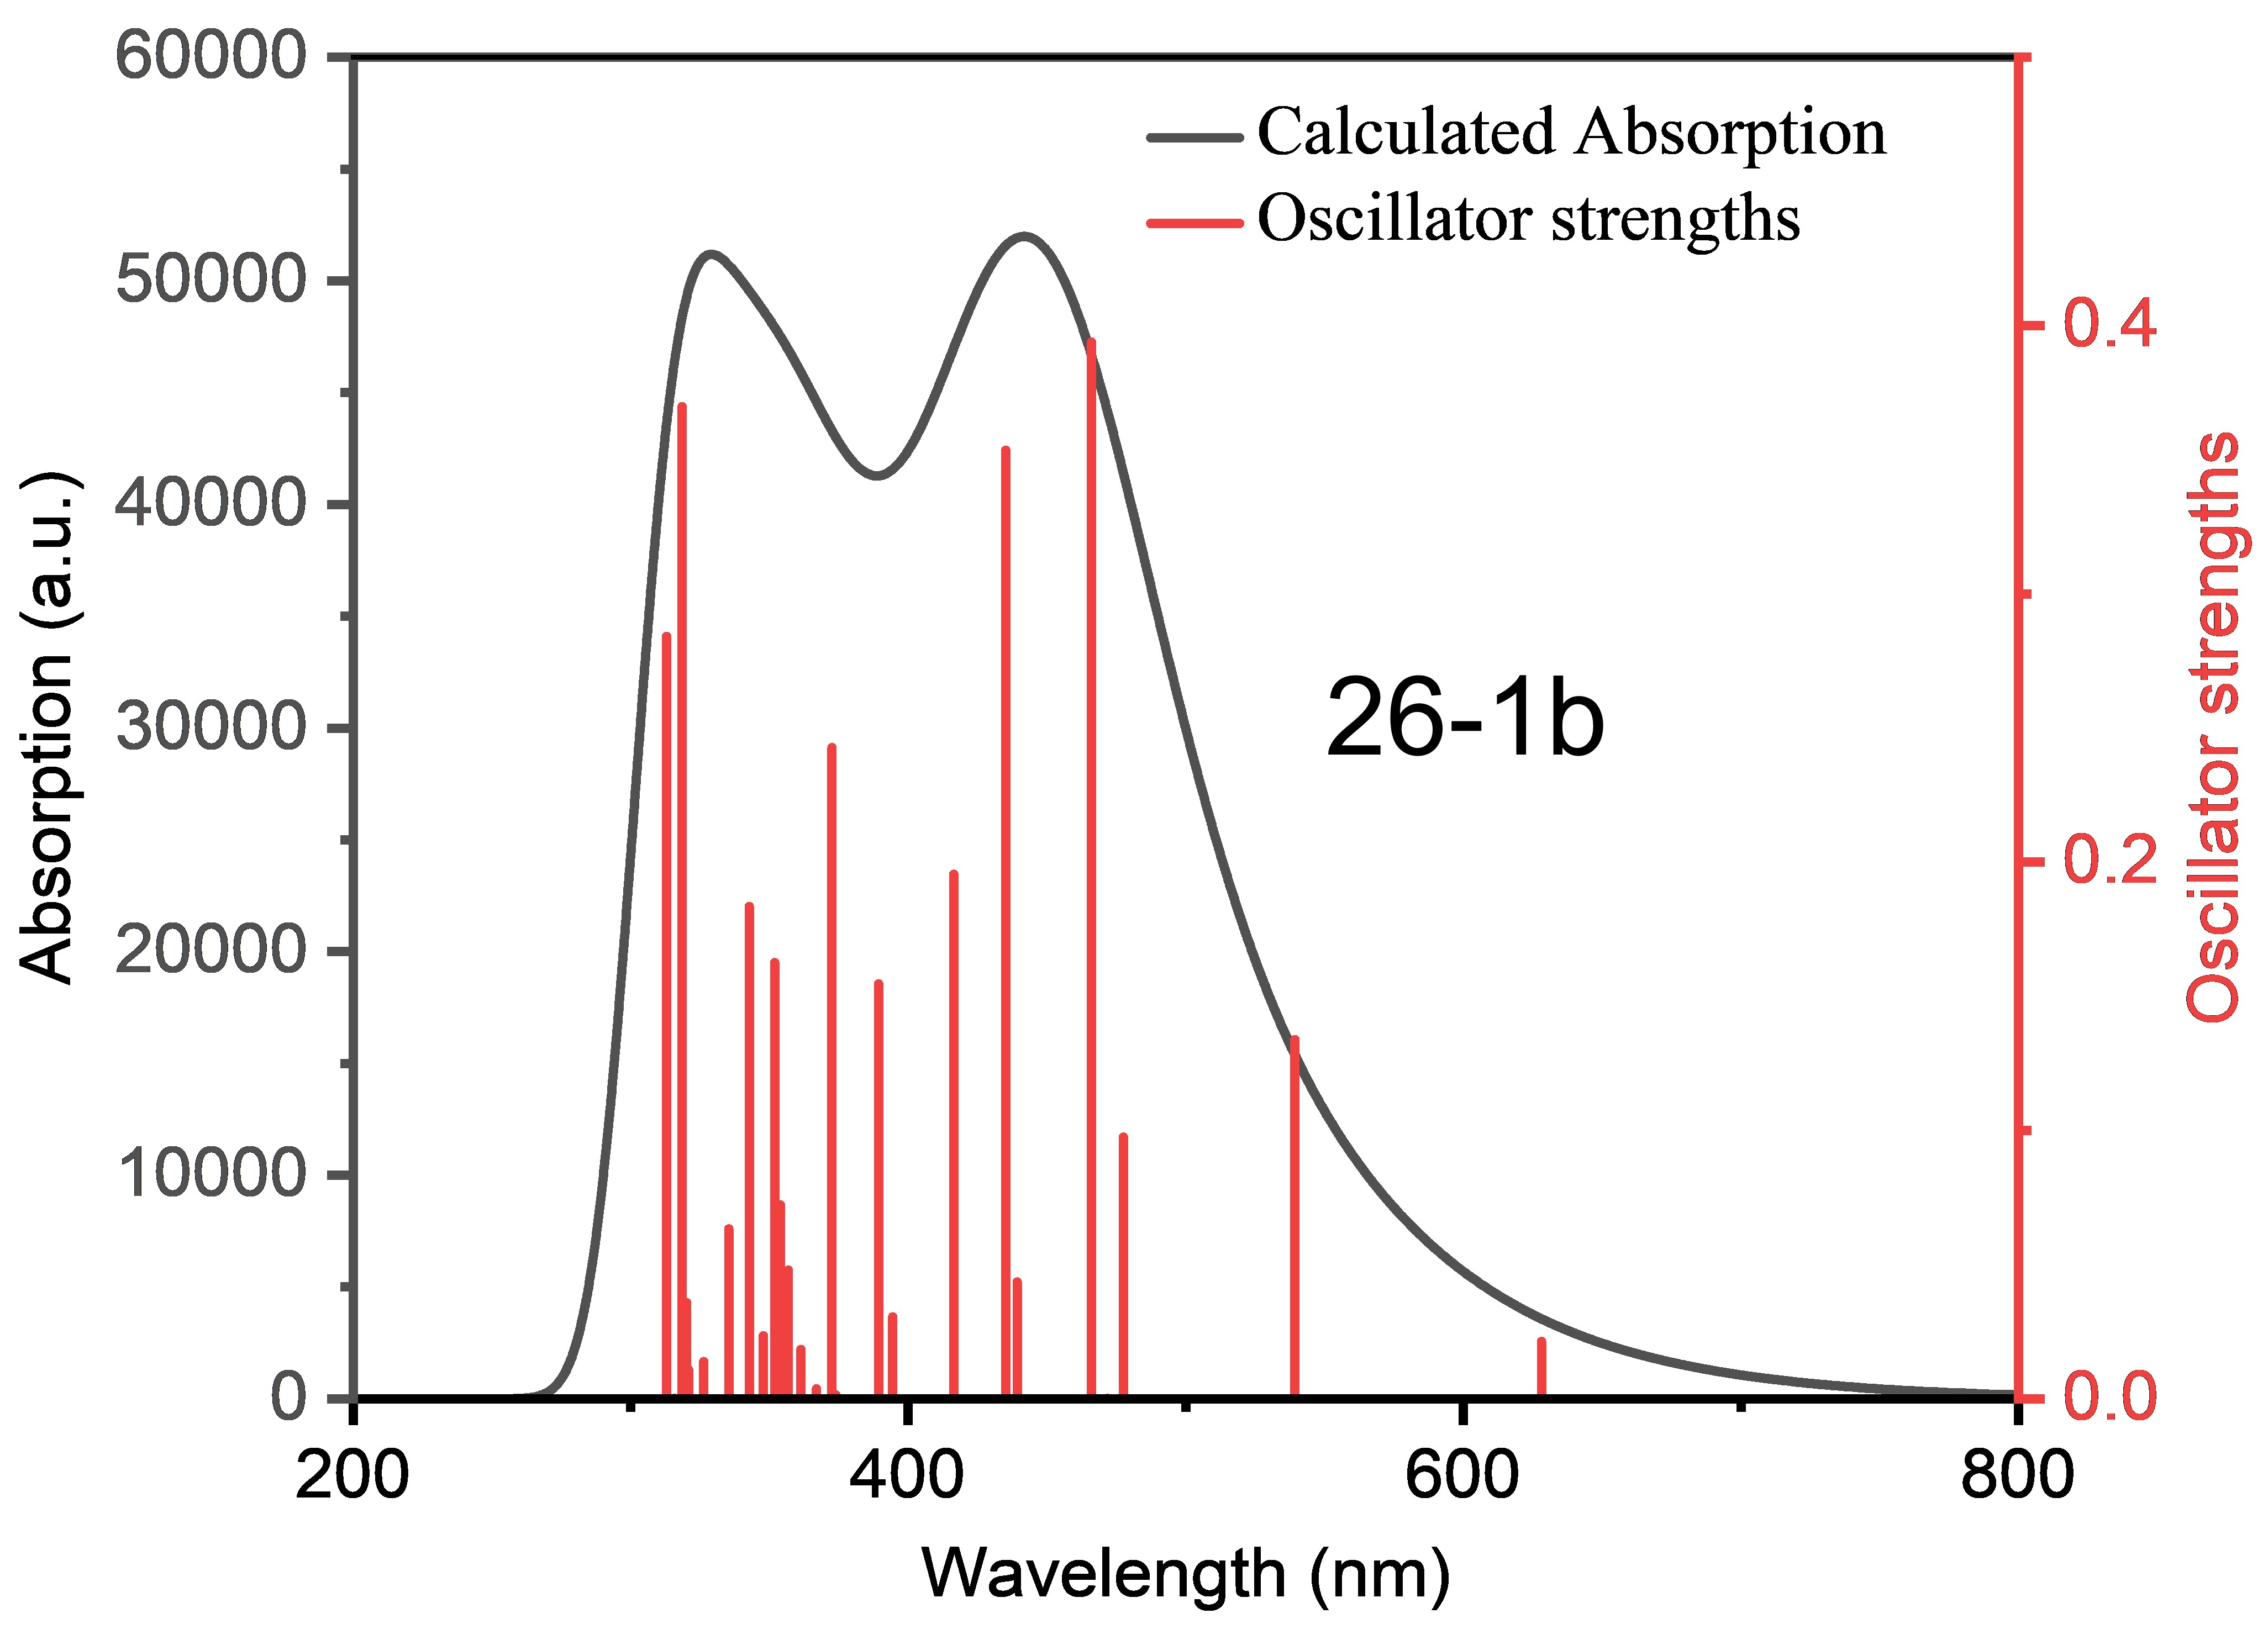


**Figure S60** Calculated UV-vis absorption spectra of the **26-1b** (closed-shell single state).

**Table S23** Excitation energies, oscillator strengths and orbital contribution of the S0 → Sn excitations of **26-1b** calculated at the TD-B3LYP-D3(BJ)/6-31G(d,p) level of theory.

| transition | energy [eV] | energy [nm] | oscillator  strength | orbital contribution | |
| --- | --- | --- | --- | --- | --- |
| S0 → S1 | 1.9738 | 628.15 | 0.02130 | H → L | 92.5% |
| S0 → S2 | 2.2989 | 539.32 | 0.13390 | H → L+1  H-2 → L | 74.3%  15.1% |
| S0 → S3 | 2.5963 | 477.54 | 0.09750 | H-1 → L | 95.4% |
| S0 → S4 | 2.6284 | 471.71 | 0.00010 | H-5 → L | 91.5% |
| S0 → S5 | 2.6604 | 466.04 | 0.39390 | H-2 → L  H → L+1  H-1 → L+1 | 66.6%  17.3%  9.4% |
| S0 → S6 | 2.8226 | 439.26 | 0.04360 | H-2 → L+1  H → L+2 | 70.2%  23.0% |
| S0 → S7 | 2.8490 | 435.18 | 0.35360 | H →L+2  H-2 → L+1  H-1 → L+1 | 68.2%  18.7%  7.4% |
| S0 → S8 | 2.9771 | 416.46 | 0.19550 | H-1 → L+1  H-6 → L  H-2 → L | 69.8%  8.3%  7.3% |
| S0 → S9 | 3.1438 | 394.38 | 0.03050 | H-3 → L | 95.0% |
| S0 → S10 | 3.1843 | 389.36 | 0.15460 | H-1 → L+2  H-2 → L+2 | 62.6%  22.0% |

12. Atomic Cartesian coordinates of the optimized geometry

**Table S24** Cartesian coordinates of the optimized geometry of **1** at the B3LYP-D3(BJ)/6-31G(d,p) level of theory.

C -0.93951700 1.11391500 -0.06078100

C 0.40351100 1.33770100 -0.05963500

C 1.38557300 0.20680300 -0.07108600

C 0.90832700 -1.14394900 -0.06351900

C -0.43509700 -1.36819600 -0.06557600

C -1.41569900 -0.23627300 -0.07391100

C -1.21312500 -2.62607800 -0.02918100

C -2.51940400 -2.20320500 -0.02057400

C -2.69986600 -0.77886300 -0.06295700

C 1.17783000 2.59631900 -0.01879400

C 2.48474700 2.17655600 -0.01273400

C 2.66944900 0.75225600 -0.05853000

C -3.70309500 -2.90935700 0.06022800

C -4.74925300 -1.85424200 0.06078700

C -4.14422700 -0.58728800 -0.01752700

C 3.66537000 2.88739900 0.06820200

C 4.71516500 1.83707700 0.06341000

C 4.11575500 0.56686600 -0.01523400

C -1.05480500 -4.02179600 0.02366800

C -2.22311300 -4.82255500 0.08384800

C -3.53733800 -4.29716600 0.10457700

C 1.01386200 3.99101600 0.04038600

C 2.17902300 4.79591300 0.10178400

C 3.49496300 4.27449500 0.11776900

O 0.21968000 -4.50731900 0.01351900

O -0.26303500 4.47025300 0.03526200

C 4.80136200 -0.72957200 -0.05758900

C 6.16241500 2.12682900 0.10586400

C -4.81772100 0.71568000 -0.05595600

C -6.19830700 -2.13340500 0.10815500

C -6.75844200 -2.69676600 1.27568400

C -8.12774100 -2.96441800 1.31148700

C -8.95836700 -2.69944600 0.21944200

C -8.38229200 -2.15486400 -0.92989900

C -7.01869400 -1.86193100 -1.00699500

C -4.29648500 1.74630400 -0.85823000

C -4.90008700 2.99595700 -0.90253200

C -6.05258900 3.28263900 -0.15370600

C -6.57515300 2.24909000 0.63351700

C -5.97441700 0.99243700 0.68564300

C 4.28360000 -1.77155300 -0.84092300

C 4.90945400 -3.01535500 -0.89810000

C 6.08323500 -3.27347300 -0.18100500

C 6.60152000 -2.22381200 0.59577700

C 5.98099000 -0.98333800 0.66347800

C 6.98126900 1.86245800 -1.01174300

C 8.34458100 2.15768500 -0.93536700

C 8.92059700 2.70231900 0.21372700

C 8.09234200 2.95415400 1.31099800

C 6.72362100 2.68435700 1.27594600

C -6.44923000 -1.27233600 -2.27336600

C -5.90294000 -2.96721700 2.49000500

C -10.44072800 -2.96924900 0.29143700

C -6.67818400 4.68107200 -0.22365200

C -7.10790900 4.97541800 -1.67730500

C -7.91380600 4.81307300 0.68096400

C -5.63634000 5.72912500 0.22535200

C 6.41269000 1.26910800 -2.27672000

C 5.87112300 2.93675800 2.49622700

C 10.39081000 3.03631200 0.26250700

C 6.80292900 -4.62729700 -0.21451500

C 6.08063600 -5.64837900 -1.10792200

C 8.23316700 -4.43046300 -0.76228000

C 6.87629400 -5.20300300 1.21633400

C -0.45898600 5.87286300 0.11469500

C 0.40736400 -5.91186000 0.07626600

H -1.63853000 1.94200800 -0.03632900

H 1.60717600 -1.97221000 -0.04028400

H -2.11521500 -5.89967700 0.12138400

H -4.37750500 -4.98355000 0.15533800

H 2.06730800 5.87251500 0.14375100

H 4.33317200 4.96319900 0.16949700

H -8.55706300 -3.38712700 2.21687700

H -9.01035600 -1.95505100 -1.79490300

H -3.41994500 1.55036800 -1.46676900

H -4.46418900 3.76037500 -1.53827700

H -7.46250700 2.41755400 1.23182700

H -6.40181700 0.22173300 1.31631500

H 3.39101400 -1.59544400 -1.43189200

H 4.46799300 -3.78429400 -1.52068300

H 7.50850700 -2.37884600 1.17179200

H 6.40689600 -0.20384700 1.28384700

H 8.97281100 1.95654900 -1.79987700

H 8.52382500 3.36518500 2.22075400

H -7.14936300 -1.39150100 -3.10431700

H -6.24624400 -0.20271200 -2.15423800

H -5.50279200 -1.74719300 -2.54660400

H -5.31475900 -2.08505300 2.76363100

H -6.52092800 -3.24782100 3.34656200

H -5.18483800 -3.77337000 2.31004800

H -10.66047300 -3.82555300 0.93591700

H -10.98003200 -2.10661500 0.70218000

H -10.85816400 -3.17187500 -0.69905500

H -7.55291400 5.97392500 -1.74937000

H -6.25895500 4.93613800 -2.36545400

H -7.84846400 4.24500500 -2.01751200

H -8.32304500 5.82491700 0.60145100

H -7.66606900 4.63598000 1.73217700

H -8.70334000 4.11245100 0.39202400

H -4.74862600 5.71562400 -0.41355600

H -6.06516600 6.73626600 0.18202100

H -5.31247200 5.53799600 1.25316000

H 5.46205800 1.73731900 -2.54675300

H 7.10946200 1.39404900 -3.10963900

H 6.21782200 0.19796600 -2.15765800

H 6.49001500 3.21846200 3.35176500

H 5.14337400 3.73609500 2.32483000

H 5.29385100 2.04639500 2.76668800

H 10.96457200 2.41578700 -0.43169900

H 10.56800700 4.08355400 -0.01215200

H 10.79977300 2.89174600 1.26701000

H 6.62824300 -6.59583600 -1.10231800

H 5.06483400 -5.84930100 -0.75263400

H 6.01909300 -5.30648900 -2.14574200

H 8.76701600 -5.38670600 -0.78887300

H 8.81122700 -3.74059600 -0.14150000

H 8.20662600 -4.02436300 -1.77822200

H 5.87263100 -5.34640500 1.62848800

H 7.38762400 -6.17194600 1.21172400

H 7.42314700 -4.53951000 1.89179000

H -1.53896100 6.02615700 0.10903000

H -0.03844100 6.28562800 1.04002000

H -0.01320600 6.39041600 -0.74387300

H 1.48616900 -6.07194700 0.06134600

H -0.00956900 -6.33238100 0.99974900

H -0.04716300 -6.41711200 -0.78500400

**Table S25** Cartesian coordinates of the optimized geometry of **2** at the UB3LYP-D3(BJ)/6-31G(d,p) level of theory.

C -1.71686500 -1.87235500 0.02868600

C -2.47221400 -0.59730700 0.01217600

C -1.76904900 0.60954100 0.01740100

C -0.36640000 0.62435400 0.02320700

C 0.36639800 -0.62434300 0.02320200

C -0.35302600 -1.86418400 0.03196200

C 0.35302400 1.86419500 0.03197400

C 1.71686300 1.87236600 0.02869800

C 2.47221200 0.59731900 0.01218000

C 1.76904700 -0.60952900 0.01739600

C 3.86600600 0.91467000 0.00987600

C -3.86600800 -0.91465900 0.00987200

C -2.69761600 -2.97671700 0.05523300

C 2.69761400 2.97672800 0.05525100

C 5.23833300 0.48600100 0.02424900

C -5.23833600 -0.48599000 0.02424400

C 2.77424800 4.38323500 0.09544800

C 4.05655900 4.98155200 0.12578200

C 5.26780500 4.24604000 0.12622800

C 5.20475200 2.85122800 0.09846100

C 3.91688400 2.34273700 0.05170900

C -2.77425100 -4.38322500 0.09541400

C -4.05656200 -4.98154200 0.12573900

C -5.26780800 -4.24602900 0.12618800

C -5.20475500 -2.85121700 0.09843300

C -3.91688600 -2.34272600 0.05169400

C -6.06245100 -1.64789100 0.07627400

C 6.06244800 1.64790000 0.07630300

C -5.70351900 0.90472900 -0.02201100

C 5.70351600 -0.90471700 -0.02202300

C -6.84077900 1.34101000 0.67926000

C -7.25985300 2.66272400 0.60126600

C -6.57313700 3.61621000 -0.16844800

C -5.43914200 3.17781800 -0.86207600

C -5.01416900 1.85225100 -0.79298900

C 5.01417800 -1.85222500 -0.79302800

C 5.43915300 -3.17779000 -0.86213500

C 6.57314100 -3.61619400 -0.16850000

C 7.25984500 -2.66272100 0.60124000

C 6.84076800 -1.34101000 0.67925400

C -7.07936400 5.06285100 -0.22273300

C -7.08843700 5.65567400 1.20300700

C -6.19730600 5.95606900 -1.10981300

C -8.51399300 5.07885900 -0.79383400

C 7.07937100 -5.06283300 -0.22280800

C 6.19732900 -5.95603400 -1.10992000

C 8.51400900 -5.07882500 -0.79388800

C 7.08842400 -5.65568500 1.20292000

O -1.59781700 -5.07133800 0.10156500

C -1.64761600 -6.48895800 0.14638500

O 1.59781400 5.07134800 0.10160300

C 1.64761200 6.48896600 0.14648400

C -7.53722100 -1.68039000 0.06470400

C -8.25604100 -1.25342700 -1.07255400

C -9.65151800 -1.30368500 -1.04857800

C -10.35694700 -1.75981200 0.06667600

C -9.62719900 -2.17572700 1.18342800

C -8.23180800 -2.15181400 1.20083100

C -7.48527500 -2.57313500 2.44398900

C -7.54711300 -0.75032100 -2.30531800

C -11.86369000 -1.82895300 0.05646200

C 7.53721800 1.68038900 0.06474000

C 8.25604000 1.25340700 -1.07251000

C 9.65151800 1.30363900 -1.04852200

C 10.35694700 1.75975500 0.06673500

C 9.62719600 2.17568900 1.18348100

C 8.23180600 2.15180300 1.20087300

C 7.48527300 2.57312400 2.44403100

C 7.54711900 0.75029500 -2.30527600

C 11.86369100 1.82886900 0.05653400

H -2.30765500 1.55187500 0.02493300

H 0.20244000 -2.79692500 0.04457000

H -0.20244200 2.79693700 0.04458800

H 2.30765300 -1.55186400 0.02492200

H 4.12823600 6.06181700 0.15260400

H 6.20973600 4.78646500 0.14862700

H -4.12823900 -6.06180700 0.15255300

H -6.20973900 -4.78645400 0.14857800

H -7.39437300 0.63851100 1.29077100

H -8.14202500 2.95838000 1.16064400

H -4.87516900 3.86805800 -1.47797700

H -4.14978400 1.53614400 -1.36802500

H 4.14980100 -1.53610900 -1.36807000

H 4.87519000 -3.86801900 -1.47805600

H 8.14201000 -2.95838700 1.16062400

H 7.39435300 -0.63852100 1.29078500

H -7.45291700 6.68860600 1.18414400

H -7.73553100 5.08459400 1.87426100

H -6.08058100 5.65554700 1.62962600

H -6.59480400 6.97562900 -1.11673300

H -6.17405800 5.60196400 -2.14514000

H -5.16823300 6.00317100 -0.73997900

H -8.53277700 4.66418000 -1.80649400

H -9.19990400 4.48987700 -0.17889200

H -8.89675700 6.10449400 -0.83591500

H 6.59482900 -6.97559300 -1.11685500

H 5.16825000 -6.00314600 -0.74010300

H 6.17409600 -5.60190900 -2.14524000

H 8.89677600 -6.10445800 -0.83598400

H 9.19990900 -4.48985500 -0.17892400

H 8.53280700 -4.66412600 -1.80653800

H 6.08056200 -5.65557000 1.62952400

H 7.45290700 -6.68861700 1.18404100

H 7.73550700 -5.08461900 1.87419600

H -0.61085700 -6.82707600 0.14743200

H -2.14713000 -6.84394300 1.05617200

H -2.16360100 -6.90003200 -0.73001300

H 0.61085200 6.82708300 0.14755800

H 2.14713700 6.84391200 1.05627900

H 2.16358500 6.90007900 -0.72990400

H -10.20180600 -0.97837900 -1.92833600

H -10.15782800 -2.52098000 2.06768700

H -8.17656300 -2.74460800 3.27291600

H -6.91311900 -3.49222400 2.28374900

H -6.76301700 -1.80918500 2.75011300

H -6.67659500 -1.36660100 -2.54647200

H -8.22122200 -0.75075000 -3.16583900

H -7.18364500 0.27273100 -2.16222200

H -12.29405400 -1.06587600 -0.59852400

H -12.21249300 -2.80391300 -0.30607900

H -12.27664600 -1.68950000 1.05988500

H 10.20180600 0.97831900 -1.92827500

H 10.15782500 2.52093400 2.06774300

H 8.17656800 2.74466600 3.27293700

H 6.91305600 3.49217000 2.28377200

H 6.76306900 1.80913800 2.75019700

H 7.18376600 -0.27280400 -2.16221700

H 6.67652800 1.36649400 -2.54636800

H 8.22119800 0.75083700 -3.16582000

H 12.21251500 2.80381700 -0.30601700

H 12.27663500 1.68942000 1.05996300

H 12.29404600 1.06577500 -0.59843800

**Table S26** Cartesian coordinates of the optimized geometry of **3** at the B3LYP-D3(BJ)/6-31G(d,p) level of theory.

O -2.62381700 -4.76384800 -0.68004000

O 2.61480100 4.74845100 -0.70276000

C -3.98691200 -1.41450500 -0.25219600

C -3.24366400 -0.15465400 -0.10856500

C -3.06402900 -2.43866900 -0.40566000

C 3.23339600 0.14234000 -0.10923400

C -1.81953500 -0.47784100 -0.26928100

C 1.80854300 0.46591200 -0.27113300

C 1.71727600 1.86391000 -0.40883200

C 0.63406400 -0.34436000 -0.32749700

C 0.66216800 -1.76254100 -0.46679900

H 1.61346900 -2.25718900 -0.60518100

C 3.75470500 -1.05628000 0.27240700

H 3.03896200 -1.83613800 0.49947000

C 3.97684500 1.40129900 -0.25935100

C -0.64494600 0.33276600 -0.32895200

C -1.72777700 -1.87671800 -0.40080300

C 5.11461500 -1.48403700 0.42714800

C 5.39458600 1.64366300 -0.23466600

C 6.31298800 -0.71798900 0.22171700

C -5.40391300 -1.65598400 -0.22589700

C -4.88850300 -4.06530900 -0.55101000

H -5.21598800 -5.09359100 -0.66898200

C -3.76676100 1.04564000 0.26725700

H -3.05151100 1.82701800 0.49069300

C 3.05450500 2.42474200 -0.41716400

C -5.78166800 -3.06163800 -0.40569900

H -6.83800700 -3.29548400 -0.40780300

C -5.12637700 1.47222400 0.41918000

C -6.42333500 -0.72036800 -0.06265800

C 6.41305400 0.71032000 -0.06518400

C -3.43458100 -3.83680300 -0.55577900

C 0.47393800 2.50835300 -0.53784400

H 0.44713200 3.58056000 -0.68678100

C 7.82501600 1.22666100 -0.16190300

C -7.83376200 -1.24193500 -0.15827800

C -0.67287200 1.75007100 -0.47369600

H -1.62401900 2.24460200 -0.61357200

C -6.32329900 0.70784300 0.21626200

C 7.66076200 -2.76000900 0.68726100

C -0.48412100 -2.52141900 -0.52748100

H -0.45727000 -3.59423000 -0.67200600

C 7.53848700 -1.41908800 0.34951200

H 8.44610300 -0.86223700 0.17855800

C 3.42585800 3.82237100 -0.57475400

C -5.26526200 2.83960400 0.77462200

H -4.35745200 3.41187300 0.93946700

C 5.25421600 -2.84663800 0.78632300

H 4.34692400 -3.41981000 0.95108100

C 8.50980400 1.62716800 1.00055300

C -7.55534200 1.41006200 0.33734900

H -8.45692100 0.84864400 0.16297000

C 8.47152200 1.24792600 -1.41079100

C -7.67471700 2.74826600 0.66883300

C 5.77263300 3.04819000 -0.42304300

H 6.82929000 3.28108600 -0.42749900

C -8.47666800 -1.27885200 -1.40860200

C 9.80422500 1.66453000 -1.47525600

H 10.30515200 1.67411400 -2.44013300

C -6.48384200 3.46559400 0.90250300

H -6.51564600 4.51527100 1.17474700

C 9.06061400 -3.37546100 0.79645200

C 6.47539900 -3.47670200 0.91974900

H 6.50170600 -4.52379200 1.19502100

C 4.87972500 4.05116200 -0.57315400

H 5.20690200 5.07877000 -0.69748600

C -8.51701100 -1.64300700 1.00480700

C -9.84171700 -2.07257900 0.89614600

H -10.36967800 -2.37998300 1.79561300

C 9.84017400 2.03957200 0.89287400

H 10.36946900 2.34601100 1.79184400

C 10.50633800 2.06438600 -0.33577100

C -9.80385500 -1.71224200 -1.47398800

H -10.30198400 -1.73393400 -2.44013400

C -7.75019600 -0.84673000 -2.65804800

H -8.41268400 -0.87663300 -3.52619200

H -6.89202100 -1.49555400 -2.86246500

H -7.36064400 0.17206700 -2.55980200

C -10.50395400 -2.11396900 -0.33404200

C 7.74385800 0.81466100 -2.65915400

H 6.89081600 1.46867400 -2.86822800

H 7.34697900 -0.20080200 -2.55605600

H 8.40798600 0.83497600 -3.52630000

C -7.83282700 -1.60144600 2.34822100

H -7.50303200 -0.58631000 2.59399500

H -6.94067700 -2.23622800 2.35947000

H -8.50372600 -1.94270300 3.13997600

C 9.85905800 -2.62451200 1.88542900

H 9.95926300 -1.56068500 1.65277000

H 10.86600100 -3.04602300 1.97305500

H 9.36638700 -2.71153700 2.85892500

C 7.82259500 1.59972300 2.34278800

H 8.49390800 1.94297100 3.13329000

H 7.48739400 0.58807400 2.59542900

H 6.93388600 2.23927500 2.34732100

C -9.03464900 3.44227900 0.78831200

C 9.78517200 -3.23116500 -0.56010300

H 9.23368200 -3.74632400 -1.35273700

H 10.78762100 -3.66813100 -0.50105400

H 9.89355200 -2.18278800 -0.85166300

C 9.00848700 -4.86571900 1.16731500

H 8.52701700 -5.02554500 2.13720900

H 10.02511200 -5.26428900 1.23331000

H 8.47101000 -5.45194500 0.41523600

C 11.93542700 2.53741500 -0.43124400

H 12.44370800 2.09999600 -1.29509000

H 12.50319800 2.27717100 0.46688500

H 11.98315700 3.62764500 -0.54123800

C -11.92679100 -2.60534800 -0.43029000

H -11.96098700 -3.69684600 -0.53256300

H -12.43781500 -2.18022900 -1.29864200

H -12.50036800 -2.34550100 0.46426900

C -10.20491200 2.48683900 0.50080300

H -10.15956400 2.08094900 -0.51450100

H -11.15064800 3.02763900 0.60069200

H -10.22644500 1.64552900 1.20038600

C -9.19453900 3.99339900 2.22183000

H -9.15622100 3.18307600 2.95636200

H -10.15761200 4.50410300 2.32522500

H -8.40810000 4.71110300 2.47157300

C -9.09536400 4.60842400 -0.22213100

H -8.30765300 5.34514600 -0.04086500

H -10.05855200 5.12381400 -0.14721400

H -8.98253700 4.24070700 -1.24659300

**Table S27** Cartesian coordinates of the optimized geometry of **25-1a** at the UB3LYP-D3(BJ)/6-31G(d,p) level of theory.

C 0.47082800 -1.10441800 -0.04422100

C 0.62179100 -2.52039600 -0.03555700

C -0.49355300 -3.37478200 -0.04686400

C -1.75434900 -2.80291100 -0.08446600

C -1.91630600 -1.34300200 -0.08976300

C -0.78928400 -0.51366500 -0.06614400

C -3.33031700 -1.05670100 -0.08127900

C -3.10361000 -3.42006100 -0.07215300

C -4.38728900 -0.10637100 -0.01709200

C -3.76077700 -4.66340300 -0.03181500

C -5.17188300 -4.68167900 0.04388400

C -5.97904600 -3.52444300 0.09036300

C -5.34134900 -2.27777500 0.04379100

C -3.96201100 -2.34061000 -0.05272200

C -5.62885200 -0.82940700 0.05947100

C -4.23314300 1.35254000 -0.02944900

C -3.22811800 1.94372800 -0.81602100

C -3.05148300 3.32097200 -0.83876900

C -3.86838700 4.17992800 -0.08545100

C -4.87248800 3.58703200 0.68931400

C -5.05386600 2.20536800 0.72146000

C 1.80443000 -0.49630200 -0.01728900

C 2.77065000 -1.59427200 0.00555300

C 2.04809100 -2.80987200 -0.00585600

C 2.04588500 0.83784500 -0.01403300

C 4.18597800 -1.55404900 0.03447600

C 4.81664800 -2.83215900 0.05166900

C 4.11619700 -4.03506700 0.04042100

C 2.71845800 -4.04579500 0.01081200

C 5.00953600 -0.36489100 0.04757900

C 3.28255400 1.56904400 0.01068800

C 3.13225100 2.97433000 0.00722200

C 4.19594000 3.85358600 0.02649400

C 5.51355300 3.35224100 0.05068400

C 5.67972200 1.97845800 0.05520400

C 4.61767000 1.02110900 0.03701000

O -3.09209300 -5.86718300 -0.03740100

C -2.44239200 -6.16426600 -1.27262000

C -3.63722400 5.69513600 -0.13993600

C -3.81367500 6.18678600 -1.59306600

C -2.20238100 6.00936100 0.33686200

C -4.62153500 6.46751900 0.75290800

O 1.94723300 -5.16693100 -0.00486600

C 2.59925700 -6.42816300 0.03212200

C 6.70441900 4.31639100 0.07159800

C 6.61135100 5.20477200 1.33117100

C 6.65535500 5.20557800 -1.18987700

C 8.05486300 3.58125500 0.09486200

C 6.48935000 -0.62375700 0.07665500

C 7.20728600 -0.74033600 -1.13006100

C 8.58487400 -0.96053300 -1.08450900

C 9.27225500 -1.06971000 0.12895000

C 8.54167400 -0.95617500 1.31281600

C 7.16037600 -0.73520900 1.30696400

C 6.39936800 -0.60153000 2.60219600

C 6.49243800 -0.61193900 -2.45186400

C 10.76323300 -1.30054000 0.14892100

C -6.98046000 -0.24413800 0.10835800

C -7.49104700 0.47640200 -0.99302200

C -8.77735000 1.01387600 -0.91204200

C -9.57161900 0.86442400 0.22655100

C -9.04683800 0.15120700 1.30763300

C -7.77055400 -0.41201800 1.26772600

C -7.22887800 -1.13979300 2.47485300

C -6.67801000 0.66798200 -2.24921000

C -10.96814900 1.43189000 0.27834700

H -0.36045300 -4.44746600 -0.00595800

H -0.90969400 0.56440000 -0.05170500

H -5.63996600 -5.66022800 0.07368900

H -7.05845200 -3.62561100 0.15392000

H -2.60009100 1.30848600 -1.43230500

H -2.26722800 3.73446900 -1.46550100

H -5.52942000 4.20310100 1.29139900

H -5.83650700 1.78529500 1.34208800

H 1.16312000 1.47391900 -0.03281800

H 5.89684900 -2.87686100 0.07474400

H 4.67670600 -4.96155500 0.05481300

H 2.12101300 3.37104300 -0.01084400

H 4.00744300 4.92162000 0.02307900

H 6.68298700 1.58786000 0.07433500

H -1.71589600 -5.39115600 -1.54758800

H -1.92248200 -7.11384300 -1.13059300

H -3.17438600 -6.26651600 -2.08383500

H -4.82494800 5.97482300 -1.95374600

H -3.64777000 7.26800200 -1.65295400

H -3.10778000 5.70157300 -2.27277200

H -2.05252700 5.66933000 1.36626600

H -2.01586200 7.08829400 0.30138200

H -1.45209600 5.51943500 -0.29009700

H -4.41842500 7.54054700 0.68277000

H -5.65927300 6.30516800 0.44558300

H -4.52599500 6.17925200 1.80434000

H 1.80610900 -7.17610800 0.02394900

H 3.24445500 -6.57074600 -0.84314900

H 3.19749500 -6.54199200 0.94397200

H 6.64480400 4.59438300 2.23890500

H 7.44894200 5.90987900 1.36134500

H 5.68448300 5.78473200 1.35098800

H 6.72045900 4.59583000 -2.09635100

H 7.49351900 5.91064700 -1.19035200

H 5.72984000 5.78572500 -1.24160500

H 8.15872700 2.94920300 0.98204000

H 8.18877800 2.94865200 -0.78792000

H 8.86923400 4.31205000 0.10856200

H 9.13550100 -1.04716600 -2.01860200

H 9.05731400 -1.03919600 2.26652500

H 7.06057600 -0.73099500 3.46264500

H 5.92498200 0.38275500 2.67929300

H 5.59819800 -1.34486300 2.66915800

H 7.18369000 -0.74445000 -3.28790800

H 5.69429900 -1.35586900 -2.54384700

H 6.02073100 0.37183300 -2.54923300

H 11.13975000 -1.38546400 1.17162100

H 11.03174800 -2.21883900 -0.38523100

H 11.29947200 -0.47812300 -0.33810500

H -9.16965600 1.56280700 -1.76490500

H -9.64360300 0.03616400 2.20945000

H -7.89893800 -1.02459500 3.33048900

H -7.10436700 -2.21011000 2.28376600

H -6.24171300 -0.75931800 2.75702700

H -7.31834300 0.97222600 -3.08127300

H -5.91430700 1.44063900 -2.11171000

H -6.15551600 -0.25006200 -2.53213100

H -11.24596300 1.71647900 1.29752900

H -11.06465500 2.31443100 -0.36059200

H -11.70638600 0.69725700 -0.06652500

**Table S28** Cartesian coordinates of the optimized geometry of **25-2a** at the UB3LYP-D3(BJ)/6-31G(d,p) level of theory.

C 1.05156700 1.83624300 0.03119700

C 0.98510500 3.30633100 -0.02362500

C -0.23484400 3.96995800 -0.11573500

C -1.40144700 3.21094100 -0.14221900

C -1.35792600 1.74107200 -0.05452200

C -0.12617600 1.08157200 0.03085500

C -2.72036500 1.26516200 -0.07839300

C -2.81060100 3.63049800 -0.22277900

C -3.65121700 0.19153500 -0.00036000

C -3.61267900 4.78617300 -0.30559700

C -5.01939000 4.62325200 -0.33314100

C -5.66611000 3.36627400 -0.26745100

C -4.88213200 2.21194600 -0.16778200

C -3.51787900 2.45139000 -0.17457900

C -4.98048900 0.74677500 -0.06249500

C -3.31602600 -1.22701700 0.15764800

C -4.09461500 -2.09943100 0.93134500

C -3.72670600 -3.43310600 1.09688300

C -2.56763200 -3.95319700 0.51029400

C -1.79612600 -3.07808100 -0.27178100

C -2.16222700 -1.75144600 -0.45164700

C 2.44481000 1.46413400 0.08874900

C 3.14928100 2.71230500 0.11230300

C 2.35770600 3.83499100 0.03534500

C 3.45485700 0.46095900 0.12556100

C 4.52597200 2.57853200 0.17316500

C 5.22276000 3.79136500 0.15163600

C 4.48505800 4.99674800 0.08486100

C 3.07088100 5.05014600 0.02415500

C 4.73649500 1.12278800 0.17521100

C 3.27559500 -0.99366000 0.04010100

C 4.13867200 -1.88573300 0.70034800

C 4.04583500 -3.25444400 0.49044400

C 3.08834200 -3.80994000 -0.37379500

C 2.19075900 -2.92284700 -0.98226500

C 2.28052600 -1.54507200 -0.78111600

O -2.97213500 5.98783100 -0.35319900

C -3.75698800 7.16733000 -0.43244000

C -2.10998200 -5.40286700 0.70351800

C -3.09123600 -6.21953800 1.55918900

C -0.73760700 -5.39773600 1.41149100

C -1.98643500 -6.09069400 -0.67315900

O 2.34295200 6.19948400 -0.05033800

C 3.03716200 7.43685200 -0.07343500

C 3.10865200 -5.31687500 -0.66039300

C 4.43499300 -5.65893000 -1.37613200

C 1.94749200 -5.75558400 -1.56619400

C 3.02577600 -6.11215500 0.65987100

C 6.06416200 0.48127300 0.15720700

C 6.50728800 -0.22724300 -0.98031400

C 7.77412000 -0.81498500 -0.95923600

C 8.61376900 -0.72564800 0.15245200

C 8.15727400 -0.01873000 1.26832100

C 6.90327100 0.59300500 1.28849000

C 6.43542700 1.31598700 2.52891800

C 5.64452400 -0.35936900 -2.21051100

C 9.98757300 -1.34822500 0.13973500

C -6.24621800 -0.00796200 -0.06313800

C -6.56578500 -0.87044400 -1.13433100

C -7.77736700 -1.56399500 -1.10601000

C -8.67976900 -1.43489300 -0.04829400

C -8.34310100 -0.58040000 1.00484600

C -7.14817800 0.14070400 1.01432200

C -6.80714700 1.01834500 2.19499100

C -5.62876000 -1.04860500 -2.30298900

C -9.99369400 -2.17548300 -0.05466700

H -0.27578900 5.05204600 -0.16288400

H -0.08262200 0.00195000 0.11124000

H -5.64531700 5.50419600 -0.40349800

H -6.75133400 3.33195600 -0.29408800

H -4.98799700 -1.72987100 1.42005400

H -4.35672900 -4.06609300 1.71019100

H -0.88822700 -3.43464400 -0.74729300

H -1.56088600 -1.10742100 -1.08437300

H 6.30747600 3.83905200 0.17865400

H 5.04318900 5.92474700 0.07422800

H 4.90182600 -1.49908900 1.36454300

H 4.75044700 -3.90339000 1.00060100

H 1.42846600 -3.29598700 -1.65634900

H 1.60435800 -0.88121600 -1.31062200

H -3.05068500 7.99785700 -0.45550300

H -4.36676600 7.18295600 -1.34415000

H -4.41343200 7.27171300 0.44018600

H -4.08420300 -6.26702700 1.10116900

H -2.72317000 -7.24491500 1.66359200

H -3.19646400 -5.80138100 2.56495600

H 0.00150600 -4.81462100 0.85689500

H -0.35649300 -6.41941100 1.51758200

H -0.82093800 -4.95709100 2.40981500

H -2.95742500 -6.12163900 -1.17737800

H -1.28851400 -5.56614800 -1.33029600

H -1.62761500 -7.11902600 -0.55622600

H 2.27124200 8.21049400 -0.13668800

H 3.62719100 7.58288200 0.83971000

H 3.70009700 7.50872000 -0.94442600

H 5.30058300 -5.39868800 -0.76060200

H 4.48535000 -6.73108700 -1.59611900

H 4.51864300 -5.11055200 -2.31964200

H 0.97696200 -5.54089900 -1.11250400

H 2.00005100 -6.83518000 -1.73690800

H 1.98734300 -5.26468300 -2.54343700

H 3.03690900 -7.18788400 0.45366400

H 3.86960800 -5.89319400 1.31948700

H 2.10644300 -5.87794300 1.20226800

H 8.11391600 -1.35623400 -1.83914600

H 8.79107200 0.05279500 2.14915400

H 7.13856200 1.16953500 3.35263600

H 6.33229300 2.39212700 2.35787100

H 5.45115700 0.95834600 2.84897000

H 6.25181200 -0.61930700 -3.08155300

H 4.88984400 -1.14213500 -2.08059200

H 5.10830200 0.56855700 -2.42656200

H 10.74361900 -0.63127900 -0.20377600

H 10.28534800 -1.67888200 1.13923000

H 10.02880900 -2.21100500 -0.53128200

H -8.02269200 -2.22251200 -1.93590300

H -9.02476500 -0.47828300 1.84601400

H -7.52568200 0.87399700 3.00571600

H -5.80618600 0.79504000 2.57846900

H -6.80604600 2.07968200 1.92821600

H -6.14761300 -1.50916700 -3.14767800

H -5.21212600 -0.09248500 -2.63196100

H -4.78268800 -1.69051800 -2.03613900

H -10.78431500 -1.57408100 -0.52037600

H -9.92233300 -3.11060400 -0.61759400

H -10.32301200 -2.41310300 0.96118200

**Table S29** Cartesian coordinates of the optimized geometry of **25-3a** at the UB3LYP-D3(BJ)/6-31G(d,p) level of theory.

C -1.19443000 0.41802000 0.00003500

C -1.19271200 1.84119400 -0.00001800

C 0.00000300 2.56682700 -0.00004500

C 1.19271600 1.84119300 -0.00001500

C 1.19443300 0.41801800 0.00003900

C 0.00000100 -0.29982200 0.00006200

C 2.58685500 -0.04604600 0.00004200

C 2.58789100 2.28011700 -0.00002900

C 2.96896800 -1.34637800 0.00006300

C 3.12515800 3.57695700 -0.00003700

C 4.51703800 3.71402700 0.00001100

C 5.34044600 2.59212000 0.00005400

C 4.84589500 1.25708700 0.00003600

C 3.43229700 1.14888500 0.00000100

C 5.78984200 0.16012500 0.00007000

C -2.58685300 -0.04604200 0.00004400

C -3.43229400 1.14889000 -0.00000200

C -2.58788600 2.28012100 -0.00004000

C -2.96896900 -1.34637400 0.00008800

C -4.84589100 1.25709500 -0.00000800

C -5.34044000 2.59212900 -0.00005700

C -4.51703100 3.71403400 -0.00009500

C -3.12515000 3.57696200 -0.00008800

C -5.78984000 0.16013300 0.00001900

C -4.27688300 -1.94429800 0.00008900

C 4.27688200 -1.94430500 -0.00000900

C -4.27621400 -3.35706400 0.00012900

C -5.42686800 -4.12017100 0.00013400

C -6.68431900 -3.48314200 0.00010100

C -6.70455500 -2.09950800 0.00006500

C -5.54713300 -1.25925200 0.00005300

C 5.54713200 -1.25926000 -0.00002700

C 6.70455400 -2.09951900 -0.00014900

C 6.68431500 -3.48315300 -0.00022500

C 5.42686200 -4.12017900 -0.00017500

C 4.27621000 -3.35707000 -0.00007300

O 2.24107200 4.61356500 -0.00007400

C 2.76145500 5.93308100 -0.00016000

O -2.24106300 4.61356900 -0.00012200

C -2.76144500 5.93308600 -0.00022400

C -7.97072700 -4.31596100 0.00009900

C -7.99454800 -5.20743200 1.26065600

C -7.99451500 -5.20746000 -1.26044100

C -9.23617800 -3.44221000 0.00007400

C 7.97072100 -4.31597400 -0.00034900

C 9.23617200 -3.44222400 -0.00028900

C 7.99449000 -5.20732500 -1.26099400

C 7.99455800 -5.20759300 1.26010300

C -7.23469800 0.57291400 0.00000100

C -7.91478100 0.75528500 1.21856100

C -9.26574600 1.11192600 1.19881800

C -9.95947500 1.29617000 -0.00003900

C -9.26568900 1.11198200 -1.19888900

C -7.91473700 0.75534700 -1.21859200

C -7.19431400 0.54651800 -2.52697600

C -7.19443000 0.54638000 2.52697300

C -11.41071500 1.70890600 -0.00009100

C 7.23470000 0.57290800 0.00018700

C 7.91484600 0.75541200 -1.21836300

C 9.26577300 1.11204500 -1.19854200

C 9.95947200 1.29618100 0.00039400

C 9.26565700 1.11188300 1.19916500

C 7.91467000 0.75522600 1.21878900

C 7.19423400 0.54626300 2.52714500

C 7.19450300 0.54666100 -2.52680400

C 11.41071500 1.70891100 0.00034500

H 0.00000400 3.64658600 -0.00008600

H 0.00000000 -1.38637000 0.00010000

H 2.15885500 -2.07301900 0.00010800

H 4.97694000 4.69455900 0.00002700

H 6.41020300 2.75024100 0.00011100

H -2.15885700 -2.07301600 0.00012500

H -6.41019700 2.75025000 -0.00006500

H -4.97693100 4.69456700 -0.00012800

H -3.31238800 -3.85846400 0.00015800

H -5.35146500 -5.20216700 0.00016600

H -7.66132400 -1.60550800 0.00004500

H 7.66132300 -1.60552100 -0.00018400

H 5.35145700 -5.20217600 -0.00021900

H 3.31238300 -3.85846800 -0.00004300

H 1.89656400 6.59725700 -0.00025400

H 3.36757600 6.12608500 0.89352900

H 3.36765700 6.12593300 -0.89382500

H -1.89655300 6.59726000 -0.00028000

H -3.36761000 6.12594300 -0.89391400

H -3.36760200 6.12608600 0.89344000

H -7.97886900 -4.59551000 2.16785900

H -8.90249800 -5.81997800 1.27610700

H -7.13468300 -5.88214100 1.29643800

H -7.97881100 -4.59555700 -2.16765600

H -8.90246600 -5.82000700 -1.27590300

H -7.13464900 -5.88216900 -1.29618400

H -9.28748100 -2.80064100 0.88501200

H -9.28746200 -2.80066200 -0.88488100

H -10.12346400 -4.08277300 0.00007100

H 10.12345800 -4.08278700 -0.00043300

H 9.28741600 -2.80053400 -0.88514400

H 9.28751700 -2.80079500 0.88474900

H 7.13463200 -5.88204100 -1.29679600

H 8.90244800 -5.81985900 -1.27654900

H 7.97875800 -4.59531600 -2.16813700

H 8.90250000 -5.82015600 1.27546000

H 7.97891100 -4.59577700 2.16737800

H 7.13468300 -5.88229200 1.29582600

H -9.78907800 1.24532800 2.14286300

H -9.78898800 1.24543100 -2.14294700

H -6.82581700 -0.48141300 -2.61276600

H -7.85321800 0.74624900 -3.37577500

H -6.32163000 1.20299100 -2.60618000

H -7.85336700 0.74611000 3.37574800

H -6.82598500 -0.48157300 2.61274700

H -6.32172000 1.20280900 2.60624400

H -11.93244400 1.33363700 -0.88536200

H -11.93205200 1.33523700 0.88607900

H -11.51260800 2.80127000 -0.00107400

H 9.78914200 1.24553300 -2.14255900

H 9.78891300 1.24526600 2.14325100

H 7.85309000 0.74604300 3.37597100

H 6.32146700 1.20262400 2.60635000

H 6.82586400 -0.48171800 2.61289100

H 7.85353900 0.74617200 -3.37555300

H 6.82575400 -0.48118200 -2.61255600

H 6.32199000 1.20334900 -2.60614000

H 11.51263100 2.80125100 -0.00640100

H 11.93069700 1.33994800 0.88925900

H 11.93378500 1.32893300 -0.88214200

**Table S30** Cartesian coordinates of the optimized geometry of **26-1a** at the B3LYP-D3(BJ)/6-31G(d,p) level of theory.

C -0.59601000 -1.15544500 -0.19894500

C -0.70870400 -2.57046400 -0.12875600

C 0.41880100 -3.39778500 -0.17387200

C 1.66452000 -2.78663500 -0.26589600

C 1.78727700 -1.33371700 -0.32617300

C 0.64918500 -0.53267400 -0.30271800

C 3.21339700 -1.00891300 -0.46408400

C 3.01560300 -3.37934300 -0.36796500

C 4.18507100 -0.05226900 -0.56662800

C 3.66518100 -4.62709800 -0.40249400

C 5.06310100 -4.65565200 -0.58799800

C 5.85937100 -3.49901400 -0.74407300

C 5.22369100 -2.25998100 -0.69334700

C 3.86514000 -2.29579000 -0.50908600

C 4.07663600 1.39643400 -0.47723900

C 3.03590500 1.98613200 0.26708400

C 2.93336300 3.36386500 0.38872100

C 3.86084200 4.22746300 -0.21913900

C 4.90144900 3.63652000 -0.94598400

C 5.01691100 2.25415500 -1.07090200

C -1.94631500 -0.59473500 -0.14775300

C -2.86770700 -1.72419700 -0.03767500

C -2.12006400 -2.89602600 -0.02525300

C -2.24059700 0.73032200 -0.19706000

C -4.30343900 -1.71920800 0.05187600

C -4.90409100 -3.05163400 0.15901600

C -4.18561600 -4.19729500 0.17573500

C -2.71599200 -4.21770700 0.08775400

C -5.14506500 -0.60894400 0.04531100

C -3.50515100 1.40156700 -0.15956700

C -3.41875300 2.81517800 -0.24101800

C -4.51984200 3.64053200 -0.22078800

C -5.81271500 3.09030000 -0.11447900

C -5.91162600 1.71189400 -0.03417800

C -4.80978400 0.81142000 -0.05096200

O 2.99613400 -5.82166200 -0.29421000

C 2.45213900 -6.07770000 1.00247200

C 3.71047900 5.74449100 -0.05564000

C 3.79157200 6.10497600 1.44390600

C 2.34031000 6.18460500 -0.61578100

C 4.80765600 6.52315300 -0.79894200

C -7.04437600 4.00026200 -0.09045100

C -7.08827300 4.82320400 -1.39640200

C -6.94050400 4.95620700 1.11787900

C -8.35533500 3.20505600 0.02862000

C -6.62084900 -0.89614500 0.15142400

C -7.23474900 -0.94177100 1.41631800

C -8.61265500 -1.16075600 1.49112000

C -9.39307200 -1.33839200 0.34573200

C -8.75916800 -1.29192500 -0.89871400

C -7.38396000 -1.07529200 -1.01678600

C -6.72959400 -1.02520200 -2.37485200

C -6.42007900 -0.74816300 2.67086600

C -10.87451500 -1.60160500 0.45093800

C 6.74822600 -0.30574700 0.00901000

C 6.55434000 -0.14413600 1.40375000

C 7.60585300 0.31568700 2.20003000

C 8.86326100 0.60670600 1.67795200

C 9.05919800 0.36675200 0.32167600

C 8.04422800 -0.09741700 -0.52525700

C 8.46697200 -0.37421800 -1.95653100

C 5.26515700 -0.47864200 2.12159000

C 9.96767600 1.15039100 2.54828600

H 0.29794300 -4.47297000 -0.15679600

H 0.73548100 0.54579200 -0.38016900

H 5.52871300 -5.63545200 -0.61162700

H 6.93155200 -3.59754800 -0.88364600

H 2.33033400 1.34701200 0.78609100

H 2.12289800 3.77495900 0.98272900

H 5.64637400 4.25698100 -1.42916400

H 5.82669900 1.82891800 -1.64949300

H -1.38785500 1.40051600 -0.28019600

H -5.98233100 -3.10846100 0.22832300

H -4.67604600 -5.16232800 0.25799000

H -2.42931000 3.25449500 -0.32405400

H -4.38066200 4.71437200 -0.28754900

H -6.89385900 1.28007500 0.04733300

H 1.77644500 -5.27854700 1.32533000

H 1.89148800 -7.01027400 0.92459200

H 3.25404100 -6.18895200 1.74322700

H 4.75511300 5.80068500 1.86388200

H 3.68297200 7.18624000 1.58215400

H 3.00455700 5.61251600 2.02169000

H 2.25866100 5.93924000 -1.67923000

H 2.21255100 7.26666800 -0.50286100

H 1.51376300 5.69403200 -0.09406900

H 4.65641600 7.59767200 -0.65747600

H 5.80491000 6.27604900 -0.42233100

H 4.78769000 6.32323300 -1.87474300

H -7.16212500 4.16544100 -2.26784800

H -7.95786200 5.48859800 -1.39512200

H -6.19477200 5.44219700 -1.51729000

H -6.90868600 4.39415700 2.05631300

H -7.80800600 5.62364500 1.14789500

H -6.04240700 5.57835400 1.06802000

H -8.49617700 2.52234600 -0.81495400

H -8.39282000 2.61602700 0.95014100

H -9.20236800 3.89726700 0.04149100

H -9.08713600 -1.19118600 2.46888100

H -9.34907000 -1.42559800 -1.80215700

H -7.46894000 -1.14192100 -3.17051200

H -6.20773900 -0.07482900 -2.52964400

H -5.98279900 -1.81857600 -2.48472000

H -7.05553300 -0.77646400 3.55898200

H -5.65741300 -1.52741100 2.77251300

H -5.89298300 0.21181700 2.65794200

H -11.41004500 -1.22550200 -0.42541600

H -11.07954600 -2.67674000 0.52166900

H -11.30163200 -1.12994900 1.34052200

H 7.43145000 0.43911100 3.26604600

H 10.04582900 0.53203500 -0.10410100

H 9.55901000 -0.36766700 -2.01431500

H 8.10791400 -1.33996600 -2.31368700

H 8.08313400 0.37348200 -2.65406000

H 5.45247200 -0.53545400 3.19684100

H 4.49480900 0.28017500 1.96300000

H 4.85384000 -1.43895800 1.80528400

H 10.95353300 0.89422000 2.14953000

H 9.91614300 2.24428400 2.61412400

H 9.90071700 0.76120100 3.56875700

O -2.06761100 -5.27120200 0.11332200

C 5.57324800 -0.76611700 -0.85849100

O 5.86836200 -0.48038900 -2.23577200

H 5.11263200 -0.81013300 -2.74189300

**Table S31** Cartesian coordinates of the optimized geometry of **25-1b** at the UB3LYP-D3(BJ)/6-31G(d,p) level of theory.

C 1.73039400 -0.88995000 -0.02429500

C 1.85847300 -2.31713500 -0.01115100

C 0.73830100 -3.12654000 -0.02269000

C -0.54854400 -2.54319400 -0.04904100

C -0.68122000 -1.10756100 -0.06104900

C 0.48547100 -0.30166100 -0.04752200

C -1.72408700 -3.35719900 -0.05878900

C -2.96617800 -2.78764300 -0.09169700

C -3.10738300 -1.31460600 -0.09542100

C -1.97481200 -0.52227300 -0.07970400

C -4.52099600 -1.01018300 -0.07837200

C -4.32551300 -3.37805900 -0.07326400

C -5.56842000 -0.04503100 -0.00847600

C -5.00107500 -4.61323100 -0.03367800

C -6.40986300 -4.61114300 0.04713200

C -7.19942300 -3.43967200 0.09848300

C -6.54482500 -2.20385900 0.05272100

C -5.16507300 -2.28458600 -0.04772800

C -6.81532800 -0.75199800 0.07065400

C -5.40192500 1.41267100 -0.02243000

C -4.39815300 1.99914700 -0.80723800

C -4.22115100 3.38113900 -0.84323800

C -5.04076800 4.23998600 -0.10156200

C -6.04474100 3.64704900 0.68159600

C -6.22526700 2.27075300 0.72674000

C 3.07759600 -0.30471100 -0.00739200

C 4.02277400 -1.42136600 0.01703600

C 3.28467500 -2.62575400 0.01489900

C 3.34203000 1.02412000 -0.01398700

C 5.44063600 -1.40342600 0.04076300

C 6.05039200 -2.68965000 0.06260600

C 5.33214800 -3.88178500 0.06127300

C 3.93425000 -3.87050300 0.03726700

C 6.28448700 -0.22799500 0.04443200

C 4.59207700 1.73556200 -0.00005500

C 4.46646900 3.14232200 -0.01412500

C 5.54573000 4.00380700 -0.00438300

C 6.85387200 3.48035400 0.02089100

C 6.99563700 2.10338800 0.03512000

C 5.91711800 1.16533000 0.02611000

O -4.34568400 -5.82393100 -0.04747200

C -3.73053200 -6.13272900 -1.29786900

C -4.88513900 5.76566700 -0.11716000

C -6.19492800 6.40635400 -0.62547500

C -3.73763800 6.22514500 -1.03087300

C -4.59250300 6.26401200 1.31476300

O 3.14523600 -4.97962600 0.03387700

C 3.77980900 -6.24992400 0.06487700

C 8.06195500 4.42308000 0.03217200

C 7.98742200 5.32273000 1.28494400

C 8.02650600 5.30327400 -1.23603400

C 9.39899200 3.66387400 0.05871700

C 7.75970200 -0.51188300 0.07108700

C 8.43292000 -0.62361300 1.30200200

C 9.80976700 -0.86204000 1.30663000

C 10.53625700 -0.99615700 0.12053900

C 9.84883900 -0.88300000 -1.09074100

C 8.47265200 -0.64489500 -1.13506700

C 7.75880600 -0.50984200 -2.45674300

C 7.67636800 -0.46589500 2.59712700

C 12.01740000 -1.28208100 0.14722600

C -8.16207900 -0.15474100 0.12063500

C -8.66844000 0.56752000 -0.98155300

C -9.94996900 1.11619200 -0.89971700

C -10.74380900 0.97585500 0.24033100

C -10.22339100 0.26057500 1.32212300

C -8.95181100 -0.31327100 1.28145600

C -8.41436100 -1.04246700 2.48967600

C -7.85533900 0.75068400 -2.23889000

C -12.13532200 1.55546600 0.29294600

H 0.83872400 -4.20511800 -0.01113100

H 0.37036800 0.77905000 -0.05490700

H -1.60913300 -4.43590000 -0.01852800

H -2.06293500 0.55952000 -0.06779600

H -6.89349700 -5.58208200 0.07670700

H -8.28005500 -3.52496300 0.16515400

H -3.76684200 1.36146700 -1.41782500

H -3.43577900 3.78393900 -1.47164500

H -6.70084600 4.27344400 1.27793800

H -7.00704500 1.85330700 1.34996900

H 2.47039200 1.67528800 -0.03305400

H 7.12986400 -2.75106300 0.08155200

H 5.87858800 -4.81654300 0.07922000

H 3.46247700 3.55688800 -0.03341600

H 5.37535100 5.07483300 -0.01608200

H 7.99195700 1.69546300 0.05461700

H -4.48440900 -6.23597500 -2.08855500

H -3.00939500 -5.36303400 -1.59681300

H -3.21125200 -7.08364800 -1.16383600

H -7.04502700 6.14727300 0.01146300

H -6.10573600 7.49816100 -0.63895800

H -6.42302100 6.06852300 -1.64116700

H -2.77411300 5.82129100 -0.70449200

H -3.66426600 7.31678600 -1.00966100

H -3.90191300 5.92365100 -2.07009800

H -4.48306700 7.35401500 1.32455000

H -5.39790100 6.00207300 2.00627300

H -3.66670700 5.82317600 1.69733100

H 2.97666600 -6.98716600 0.06110100

H 4.41667000 -6.40053800 -0.81510600

H 4.38304000 -6.37343300 0.97226900

H 8.01169200 4.71890900 2.19736200

H 8.83760500 6.01288300 1.30811600

H 7.07115500 5.91940000 1.30190900

H 8.07872800 4.68549800 -2.13788700

H 8.87728200 5.99304000 -1.24355800

H 7.11150000 5.89962600 -1.29049800

H 9.49309300 3.03661800 0.95038200

H 9.52010600 3.02234800 -0.81944600

H 10.22642800 4.37993900 0.06562000

H 10.32721000 -0.94129900 2.25991200

H 10.39703400 -0.97879800 -2.02513300

H 6.94721200 -1.23960500 -2.54423400

H 7.30501300 0.48189100 -2.55857200

H 8.44654700 -0.65905800 -3.29287100

H 8.33662100 -0.59925900 3.45771600

H 7.21874200 0.52687000 2.66638200

H 6.86290200 -1.19505100 2.67128400

H 12.49056700 -0.85461200 1.03605500

H 12.21255000 -2.36154600 0.16204900

H 12.51878800 -0.87374400 -0.73509100

H -10.33868300 1.66709200 -1.75295300

H -10.81964200 0.15267700 2.22517100

H -9.07863300 -0.91384200 3.34791500

H -8.30581300 -2.11548500 2.30378100

H -7.42064500 -0.67434700 2.76505800

H -8.49386400 1.06056700 -3.07025800

H -7.08401400 1.51597700 -2.10273300

H -7.34186100 -0.17242500 -2.52185400

H -12.87988700 0.82825400 -0.05405400

H -12.41103900 1.84007500 1.31267900

H -12.22376800 2.44035200 -0.34393400

**Table S32** Cartesian coordinates of the optimized geometry of **25-2b** at the UB3LYP-D3(BJ)/6-31G(d,p) level of theory.

C -2.44729200 1.68893900 -0.11193600

C -2.44713900 3.16506100 -0.13611200

C -1.26226100 3.85609400 -0.15725900

C -0.02025900 3.15850100 -0.14851100

C -0.01633800 1.71664800 -0.11022800

C -1.24415200 1.00925400 -0.09273400

C 1.21818100 3.86203200 -0.16520000

C 2.40652100 3.17686600 -0.14861800

C 2.41498100 1.70082100 -0.11709500

C 1.21513500 1.01544200 -0.09325200

C 3.79459400 1.26990400 -0.09863400

C 3.81116100 3.64024500 -0.13199400

C 4.74808500 0.21861400 -0.03241500

C 4.58128600 4.82052400 -0.11973500

C 5.99158100 4.69908300 -0.07126100

C 6.67293900 3.45893300 -0.02277900

C 5.92166400 2.27963900 -0.02116800

C 4.55171200 2.48231500 -0.09353000

C 6.06040700 0.81254200 0.01525000

C 4.43646700 -1.21513800 -0.00956000

C 3.35727900 -1.70657100 -0.75929300

C 3.01046600 -3.05559100 -0.73320800

C 3.72931500 -3.97725700 0.03690900

C 4.81925700 -3.48281500 0.77238800

C 5.16953000 -2.13828200 0.75554600

C -3.82415200 1.25052200 -0.09024700

C -4.58827600 2.45809900 -0.07170400

C -3.85450300 3.62047000 -0.10790900

C -4.77045700 0.19295700 -0.02800300

C -5.95651000 2.24624200 0.00792100

C -6.71467800 3.42107700 0.01952300

C -6.04088800 4.66554600 -0.02562900

C -4.63167300 4.79594700 -0.08324900

C -6.08594200 0.77773000 0.03368400

C -4.44628000 -1.23810100 -0.02601400

C -5.15413000 -2.17759900 0.73581200

C -4.78770800 -3.52312100 0.73469600

C -3.70590200 -3.99127500 -0.02088200

C -3.01134800 -3.04776100 -0.79526900

C -3.37045900 -1.70686900 -0.80150400

O 3.90741900 6.00419700 -0.15532400

C 4.65887900 7.20812500 -0.14016200

C 3.37069600 -5.46698200 0.10509300

C 4.57311600 -6.30591200 -0.37860100

C 2.15560300 -5.81442300 -0.77013100

C 3.03520100 -5.84280600 1.56485800

O -3.96535400 5.98394600 -0.11649900

C -4.72404500 7.18311300 -0.08890500

C -3.26368600 -5.45988100 -0.03476900

C -4.11766700 -6.33489200 0.89648100

C -1.79240000 -5.55389100 0.42612000

C -3.38596000 -6.01502100 -1.47050700

C -7.36294700 0.04372500 0.07844600

C -8.18142600 0.13675600 1.22625900

C -9.38842400 -0.56335900 1.25911200

C -9.81517600 -1.34691900 0.18379000

C -8.99824500 -1.41526200 -0.94665900

C -7.77820000 -0.74007700 -1.02015400

C -6.93869100 -0.84544300 -2.26910800

C -7.74380200 0.94135300 2.42690700

C -11.10888100 -2.11928400 0.25347500

C 7.34308700 0.08824100 0.05587800

C 7.75473600 -0.70243100 -1.03918700

C 8.98012600 -1.36832000 -0.96998500

C 9.80596600 -1.28415900 0.15288700

C 9.38262500 -0.49408100 1.22479900

C 8.17048600 0.19726600 1.19591300

C 7.73693800 1.00857700 2.39354500

C 6.90542600 -0.82525000 -2.27989800

C 11.10558000 -2.04688200 0.21860400

H -1.26241900 4.94147900 -0.17385900

H -1.22457300 -0.07503800 -0.05533600

H 1.21313900 4.94734900 -0.18491500

H 1.20064900 -0.06874700 -0.05252500

H 6.59280700 5.59980100 -0.06648400

H 7.75851500 3.45800800 0.01298100

H 2.79629400 -1.02087700 -1.38581800

H 2.16827700 -3.38300500 -1.33102200

H 5.40553900 -4.16120500 1.38451600

H 6.00960600 -1.79531000 1.34802000

H -7.79995600 3.41360500 0.06295100

H -6.64741900 5.56259000 -0.01087900

H -5.98966900 -1.85265300 1.34488700

H -5.35871000 -4.20929400 1.34863100

H -2.17583300 -3.36526500 -1.41158000

H -2.82809700 -1.00575900 -1.42733900

H 3.92992800 8.01858000 -0.17075600

H 5.26042300 7.29370100 0.77308000

H 5.31925900 7.27955700 -1.01307900

H 5.46082900 -6.13144700 0.23547400

H 4.33670100 -7.37451400 -0.33070000

H 4.82814800 -6.05735700 -1.41349200

H 1.26131800 -5.26922600 -0.45338800

H 1.93625900 -6.88344700 -0.68886900

H 2.33889500 -5.59222600 -1.82606800

H 2.78295200 -6.90649900 1.63646800

H 3.87766500 -5.65185200 2.23519800

H 2.18050000 -5.26321400 1.92724500

H -4.00029600 7.99820600 -0.11984900

H -5.39103700 7.25560400 -0.95669400

H -5.31959200 7.25962700 0.82905800

H -5.17066000 -6.33533600 0.59817700

H -3.76195000 -7.36912200 0.85922700

H -4.05564600 -5.99872500 1.93615100

H -1.12871200 -4.98036400 -0.22660100

H -1.45325600 -6.59538900 0.41434700

H -1.67716600 -5.16669900 1.44318100

H -4.42121500 -5.95885400 -1.82096300

H -2.76387500 -5.45476100 -2.17402500

H -3.06898000 -7.06317500 -1.50319900

H -10.00877800 -0.49903700 2.14999200

H -9.32078500 -2.00730800 -1.79990500

H -7.53167600 -1.23279900 -3.10168900

H -6.52765800 0.12564300 -2.55893500

H -6.08901600 -1.51947200 -2.11832400

H -8.40544400 0.75992200 3.27762400

H -6.72198600 0.68434400 2.72454000

H -7.74437400 2.01610500 2.22045400

H -11.54754300 -2.25368300 -0.73950900

H -10.94983600 -3.11877500 0.67704000

H -11.84393800 -1.61223400 0.88536400

H 9.29961000 -1.96585300 -1.82054100

H 10.00983700 -0.41763900 2.10990300

H 8.40549600 0.83701500 3.24089800

H 7.73031400 2.08175100 2.17920600

H 6.71862500 0.74838200 2.70026400

H 7.49385600 -1.21716200 -3.11357200

H 6.06117600 -1.50288800 -2.11540300

H 6.48596700 0.14040500 -2.57573900

H 11.84255100 -1.52874200 0.83917000

H 10.95718400 -3.04333300 0.65305200

H 11.53650100 -2.18779200 -0.77685500

**Table S33** Cartesian coordinates of the optimized geometry of **25-3b** at the UB3LYP-D3(BJ)/6-31G(d,p) level of theory.

C 2.42137000 0.35130500 0.00002000

C 2.42001900 1.78683500 -0.00004000

C 1.23631800 2.48971500 -0.00008500

C -0.00001000 1.79046300 -0.00007100

C 0.00003400 0.34764700 -0.00000900

C 1.23727800 -0.34796700 0.00003500

C -1.23638100 2.48963300 -0.00011400

C -2.42004000 1.78667600 -0.00009600

C -2.42130300 0.35114400 -0.00003300

C -1.23716300 -0.34804900 0.00000900

C -3.81666900 -0.11050900 -0.00001700

C -3.81635800 2.22023100 -0.00012300

C -4.19913200 -1.41017200 0.00006200

C -4.35365000 3.51648000 -0.00017400

C -5.74522300 3.65239200 -0.00018000

C -6.56696600 2.52909800 -0.00014900

C -6.07305600 1.19484500 -0.00012200

C -4.65820700 1.08679000 -0.00009200

C -7.01812700 0.09846700 -0.00007500

C 3.81676600 -0.11026500 0.00005500

C 4.65824300 1.08709400 0.00001700

C 3.81631100 2.22047900 -0.00003300

C 4.19927000 -1.40991400 0.00009300

C 6.07307600 1.19523500 0.00005000

C 6.56692100 2.52953500 0.00003900

C 5.74508300 3.65275100 -0.00002300

C 4.35351500 3.51675800 -0.00006200

C 7.01819500 0.09886600 0.00012300

C 5.50816000 -2.00757700 0.00009600

C -5.50799000 -2.00790400 0.00010200

C 5.50883100 -3.41978800 0.00007000

C 6.66077000 -4.18192400 0.00003000

C 7.91714800 -3.54406200 0.00000300

C 7.93555500 -2.15990100 0.00003800

C 6.77734700 -1.32173300 0.00010600

C -6.77722700 -1.32215600 0.00004100

C -7.93536200 -2.16044000 0.00004500

C -7.91682900 -3.54460100 0.00015200

C -6.66039600 -4.18235600 0.00022500

C -5.50853200 -3.42012300 0.00019000

O -3.46936500 4.55273200 -0.00020200

C -3.99071800 5.87278100 -0.00025200

O 3.46918200 4.55295900 -0.00011400

C 3.99048400 5.87304100 -0.00012600

C 9.20460900 -4.37532000 -0.00008600

C 9.22984200 -5.26664400 1.26053500

C 10.46896700 -3.49993700 -0.00036200

C 9.22947900 -5.26691300 -1.26052300

C -9.20426700 -4.37589800 0.00016900

C -10.46868900 -3.50063000 -0.00002700

C -9.22928700 -5.26721300 1.26080600

C -9.22910900 -5.26752800 -1.26024700

C 8.46257800 0.51286200 0.00019000

C 9.14123400 0.70079300 -1.21846100

C 10.48941000 1.06741600 -1.19874500

C 11.18332000 1.25124900 0.00020500

C 10.48932600 1.06797500 1.19895000

C 9.14095400 0.70130400 1.21867400

C 8.41946200 0.49704800 2.52720100

C 8.41977300 0.49591500 -2.52690700

C 12.64913700 1.60880100 -0.00030700

C -8.46247500 0.51263600 -0.00012100

C -9.14237300 0.69585700 1.21853600

C -10.49292600 1.05371100 1.19882200

C -11.18662600 1.23829200 -0.00010700

C -10.49316700 1.05306800 -1.19890300

C -9.14248200 0.69515400 -1.21864800

C -8.42262400 0.48469200 -2.52709100

C -8.42218800 0.48617700 2.52692300

C -12.63749700 1.65228400 0.00027000

H 1.23625700 3.57297700 -0.00013000

H 1.22281400 -1.43493000 0.00008200

H -1.23638700 3.57289500 -0.00015900

H -1.22262800 -1.43501100 0.00005800

H -3.38898700 -2.13665200 0.00010600

H -6.20649100 4.63222700 -0.00020700

H -7.63684000 2.68659600 -0.00014900

H 3.38915800 -2.13643000 0.00010200

H 7.63676000 2.68730100 0.00009500

H 6.20632000 4.63259800 -0.00003100

H 4.54562300 -3.92232400 0.00007200

H 6.58623100 -5.26399900 -0.00000100

H 8.89164300 -1.66457000 0.00002600

H -8.89160700 -1.66542000 -0.00004300

H -6.58577700 -5.26442400 0.00029200

H -4.54527400 -3.92256800 0.00023000

H -3.12646000 6.53757900 -0.00026700

H -4.59692400 6.06444200 -0.89402100

H -4.59694100 6.06450300 0.89349300

H 3.12619300 6.53779600 -0.00016200

H 4.59666700 6.06477000 0.89363900

H 4.59671300 6.06473500 -0.89386800

H 8.37085400 -5.94245200 1.29641000

H 10.13858300 -5.87802700 1.27595600

H 9.21340500 -4.65470400 2.16771400

H 10.51924500 -2.85858300 -0.88554900

H 11.35706400 -4.13937900 -0.00032000

H 10.51940500 -2.85824400 0.88457000

H 8.37044000 -5.94267600 -1.29604000

H 9.21285200 -4.65516500 -2.16782900

H 10.13818000 -5.87835300 -1.27603800

H -10.51924400 -2.85919000 -0.88511100

H -11.35673300 -4.14013600 0.00007000

H -10.51928200 -2.85885800 0.88481500

H -8.37025100 -5.94297200 1.29664200

H -10.13799500 -5.87863700 1.27631100

H -9.21284300 -4.65524400 2.16796700

H -10.13779300 -5.87898900 -1.27570700

H -9.21257800 -4.65578500 -2.16755800

H -8.37004200 -5.94326400 -1.29580900

H 11.00975600 1.21178300 -2.14283000

H 11.00955400 1.21272100 2.14301100

H 8.05069200 -0.53054000 2.61558800

H 7.54684900 1.15392600 2.60428900

H 9.07789400 0.69892100 3.37584500

H 9.07826000 0.69726700 -3.37563100

H 8.05088900 -0.53167800 -2.61474500

H 7.54723100 1.15284300 -2.60436500

H 13.27588100 0.70864300 -0.02265500

H 12.91373400 2.20971100 -0.87537400

H 12.92317300 2.17315300 0.89578400

H -11.01608500 1.18770700 2.14288000

H -11.01646500 1.18657200 -2.14293200

H -9.08152100 0.68454500 -3.37585200

H -7.54920500 1.14010100 -2.60721600

H -8.05533400 -0.54372100 -2.61220900

H -9.08089200 0.68648000 3.37572800

H -8.05481800 -0.54216500 2.61253000

H -7.54878300 1.14167800 2.60645100

H -12.73845200 2.74461700 0.01592500

H -13.15589500 1.29107300 -0.89270200

H -13.16275400 1.26555300 0.87853600

**Table S34** Cartesian coordinates of the optimized geometry of **26-1b** at the B3LYP-D3(BJ)/6-31G(d,p) level of theory.

C 1.80877000 -0.94790200 -0.20262500

C 1.88676500 -2.37989200 -0.19625000

C 0.74988300 -3.15444000 -0.27755400

C -0.51458700 -2.52095300 -0.37305000

C -0.59701200 -1.08067000 -0.38401800

C 0.59148900 -0.31246400 -0.29412000

C -1.71398700 -3.28339100 -0.44775400

C -2.93220700 -2.66017400 -0.55131900

C -3.01926300 -1.19269800 -0.57585700

C -1.86699400 -0.44830100 -0.48060300

C -4.44615100 -0.83112200 -0.61661800

C -4.30166300 -3.21112300 -0.58476000

C -5.39787400 0.15178200 -0.55389000

C -4.98189100 -4.43985900 -0.54044700

C -6.39026500 -4.43206700 -0.48212400

C -7.16483600 -3.25146600 -0.46027100

C -6.49837900 -2.03001100 -0.54735700

C -5.12936000 -2.10106700 -0.60402400

C -5.24275800 1.59442000 -0.67147800

C -4.08416800 2.14264000 -1.24970800

C -3.90500200 3.51794000 -1.35542500

C -4.87830600 4.41701400 -0.90022100

C -6.04904600 3.86642400 -0.35367000

C -6.23855900 2.49579700 -0.24608500

C 3.17690600 -0.42438200 -0.10075900

C 4.06287700 -1.58288800 -0.03593200

C 3.29192700 -2.73669500 -0.09351800

C 3.50337300 0.89261900 -0.07513600

C 5.50236400 -1.61770100 0.07028800

C 6.06925900 -2.96670800 0.11094700

C 5.32461500 -4.09477400 0.05400500

C 3.85786600 -4.07595100 -0.05527500

C 6.36867700 -0.53123900 0.13520300

C 4.78424800 1.53050800 0.02026400

C 4.73461500 2.94696800 0.01823400

C 5.85638500 3.74189100 0.10152200

C 7.13251300 3.15474000 0.19442800

C 7.19474000 1.77085600 0.19748400

C 6.07126400 0.90346600 0.11428100

O -4.32846700 -5.65019600 -0.51418200

C -3.69835200 -5.99513500 -1.74865200

C -4.71849900 5.93888200 -0.99097600

C -5.85184300 6.52020900 -1.86414400

C -3.37288700 6.34833500 -1.61106300

C -4.80202800 6.54378400 0.42754400

C 8.38653400 4.02917700 0.28762500

C 8.28809600 4.91860600 1.54612100

C 8.47258600 4.92236500 -0.96911800

C 9.67464000 3.19409100 0.38074200

C 7.83568400 -0.86008100 0.24336300

C 8.43072400 -0.99165900 1.51125100

C 9.80205100 -1.24721100 1.59034900

C 10.59381000 -1.37834400 0.44645000

C 9.97829100 -1.24655000 -0.80107200

C 8.61018700 -0.99092900 -0.92363500

C 7.97572500 -0.84845200 -2.28458500

C 7.60362000 -0.85000300 2.76457700

C 12.06725300 -1.68197200 0.55499100

C -7.74402800 -0.20069900 0.67359900

C -9.15257800 -0.16233400 0.51535700

C -9.95203000 0.15229600 1.62147200

C -9.42790300 0.40048900 2.88619400

C -8.04965500 0.27475000 3.03907200

C -7.20102900 -0.03411700 1.97229200

C -5.73597600 -0.20193400 2.30920500

C -9.90266300 -0.47325900 -0.76649500

C -10.31432600 0.78155700 4.04453400

H 0.82860600 -4.23524200 -0.26800200

H 0.51289900 0.77186600 -0.29999700

H -1.64898100 -4.36490100 -0.39140500

H -1.90544400 0.63532300 -0.45815700

H -6.88126100 -5.39859800 -0.43615600

H -8.24480100 -3.31938400 -0.37439900

H -3.33308300 1.47673300 -1.65728500

H -2.99467700 3.88534400 -1.81380100

H -6.83855300 4.52387100 -0.00344300

H -7.16012300 2.11678400 0.17542300

H 2.66877600 1.58736000 -0.13592500

H 7.14469100 -3.05350000 0.19093500

H 5.79241100 -5.07387600 0.08738400

H 3.75811300 3.41624300 -0.05279900

H 5.74430800 4.82100800 0.09459200

H 8.16442000 1.30981400 0.26807500

H -4.44351900 -6.12079500 -2.54421100

H -2.97228500 -5.23512700 -2.05970400

H -3.18143700 -6.94142700 -1.58032300

H -6.83781800 6.29589000 -1.44849000

H -5.75708300 7.60924000 -1.93514300

H -5.81324200 6.10608700 -2.87638600

H -2.52724000 5.97957600 -1.02198600

H -3.30144800 7.43964100 -1.64770900

H -3.26775100 5.97489700 -2.63446200

H -4.69582400 7.63316700 0.38346900

H -5.75860200 6.31944000 0.90703200

H -4.00650700 6.14747700 1.06621300

H 8.22653000 4.30607000 2.45086100

H 9.17189300 5.56003100 1.62648600

H 7.40719800 5.56620900 1.51817900

H 8.54313300 4.31254400 -1.87504900

H 9.35888400 5.56334400 -0.91808100

H 7.59725800 5.57062600 -1.06768500

H 9.68236500 2.55358100 1.26802800

H 9.81144700 2.55616100 -0.49785400

H 10.53884900 3.86180100 0.44487600

H 10.26228900 -1.34395000 2.57058900

H 10.57725700 -1.34286300 -1.70330500

H 7.21197900 -1.61600600 -2.44814900

H 7.47876400 0.12165900 -2.39153000

H 8.72284700 -0.93809300 -3.07648700

H 8.22643700 -0.94110800 3.65738600

H 7.09703100 0.12042500 2.79862700

H 6.82358000 -1.61702000 2.81356200

H 12.49338000 -1.26881500 1.47367100

H 12.24644800 -2.76391600 0.57035600

H 12.62281300 -1.27236000 -0.29342100

H -11.02954600 0.18956000 1.48120600

H -7.61112400 0.40946100 4.02455900

H -5.60888600 -0.18791900 3.39439100

H -5.33701700 -1.14950300 1.94051200

H -5.11664400 0.59648700 1.89346300

H -10.95484600 -0.65579700 -0.53031800

H -9.84653100 0.35004600 -1.48157000

H -9.50680500 -1.35097200 -1.27842200

H -9.92124100 0.39878000 4.99115100

H -10.39076800 1.87165600 4.14170800

H -11.32912800 0.39439800 3.91499000

O 3.18464200 -5.11266600 -0.10938900

C -6.83396900 -0.52372200 -0.52320200

O -7.48768900 -0.08389500 -1.71745000

H -6.90624300 -0.33096400 -2.44953700

13. 1H NMR and 13C NMR spectra


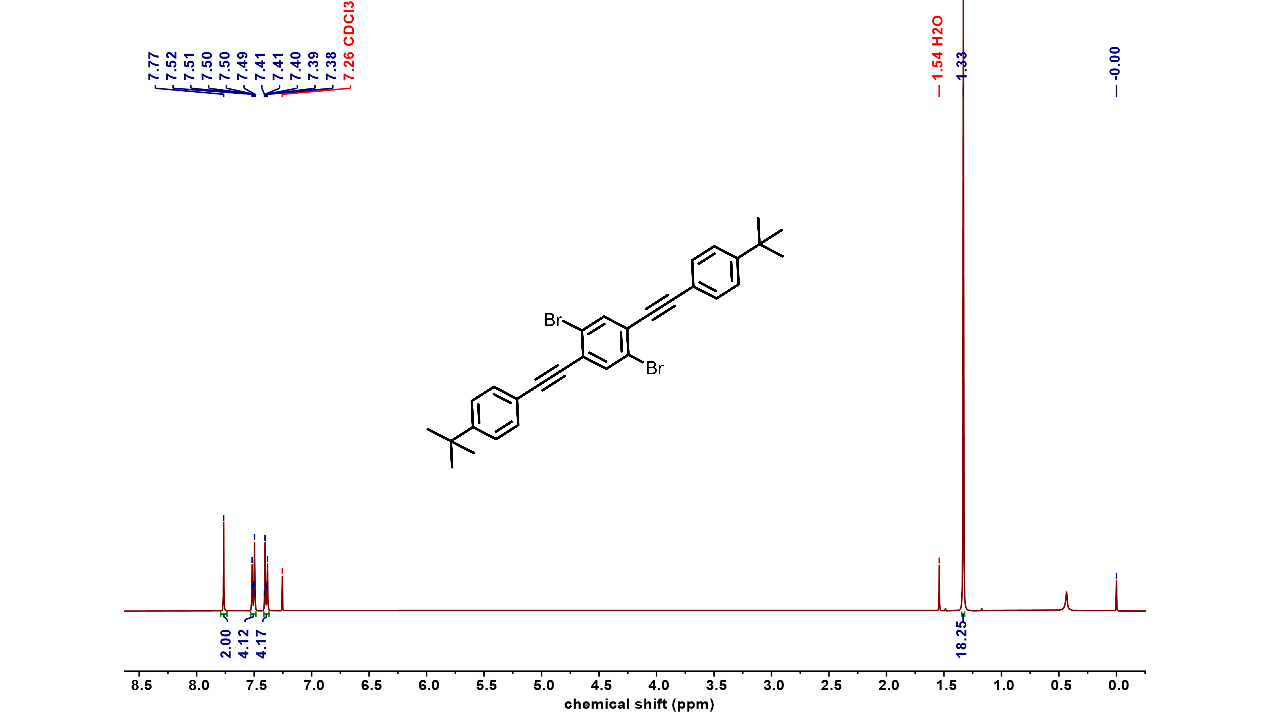


**Figure S61** 1H NMR spectrum of compound **5** (400 MHz, CDCl3, 298 K)


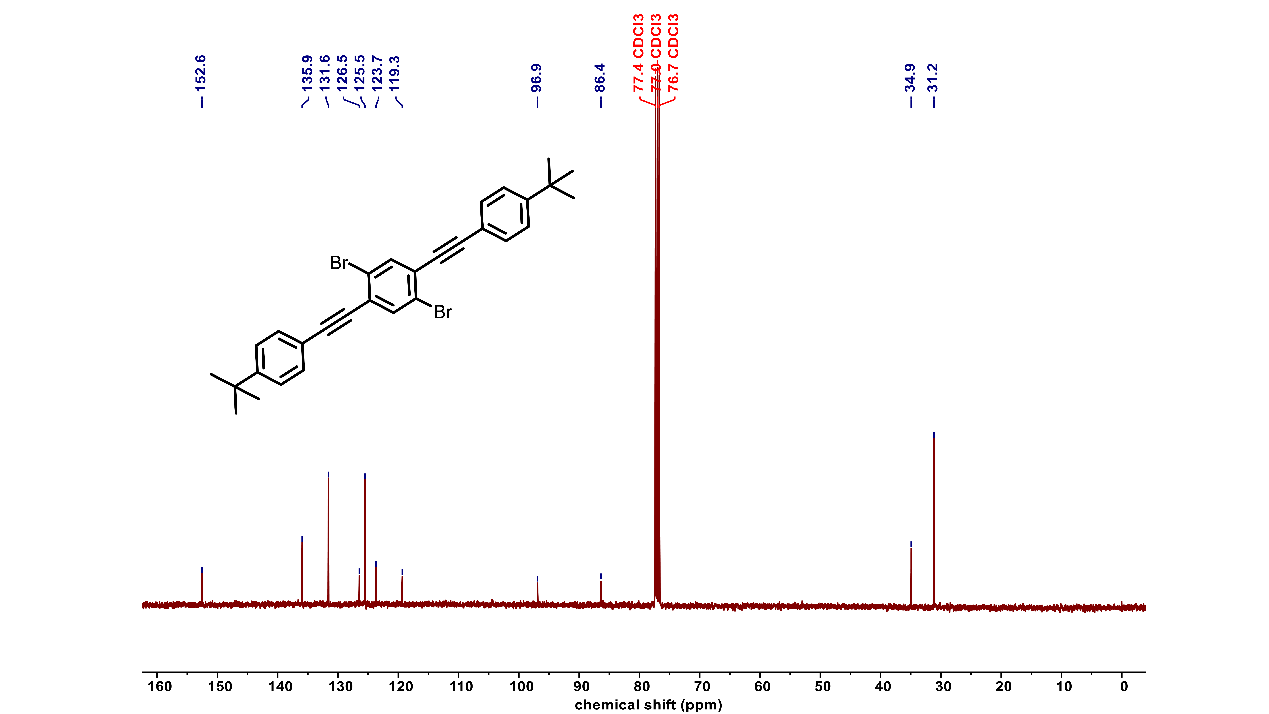


**Figure S62** 13C NMR spectrum of compound **5** (101 MHz, CDCl3, 298 K)


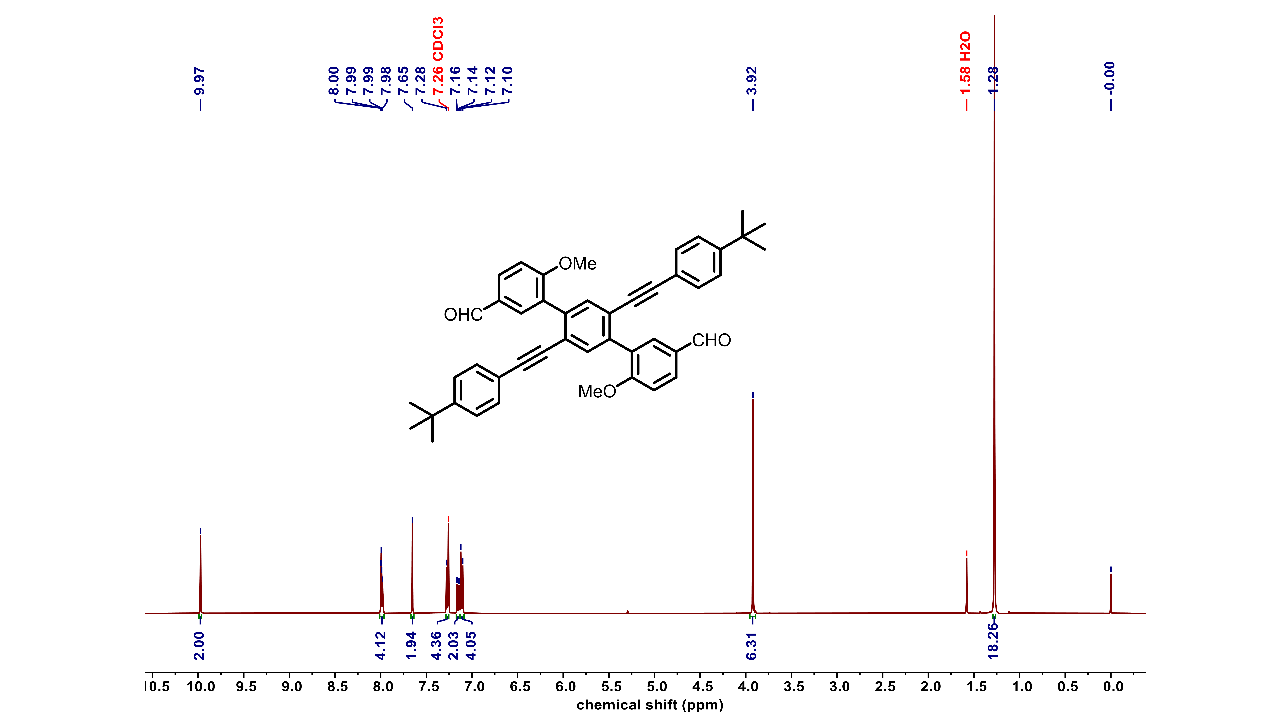


**Figure S63** 1H NMR spectrum of compound **6** (400 MHz, CDCl3, 298 K)


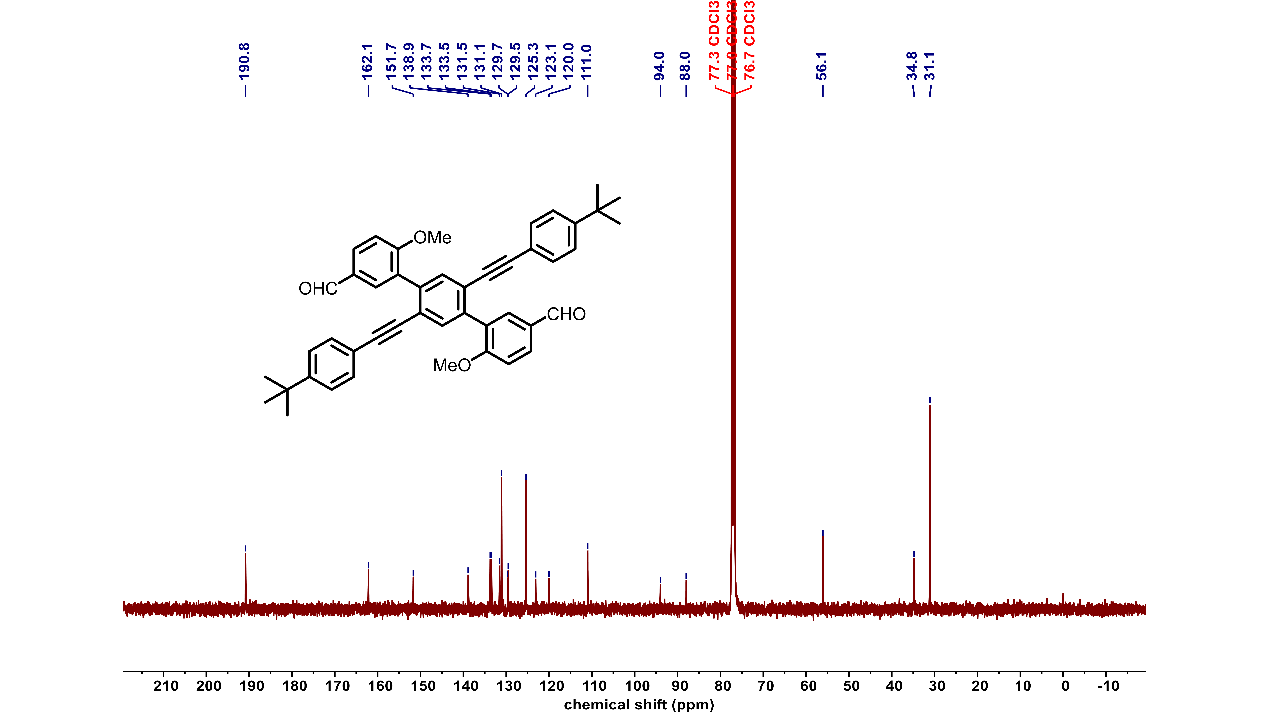


**Figure S64** 13C NMR spectrum of compound **6** (101 MHz, CDCl3, 298 K)


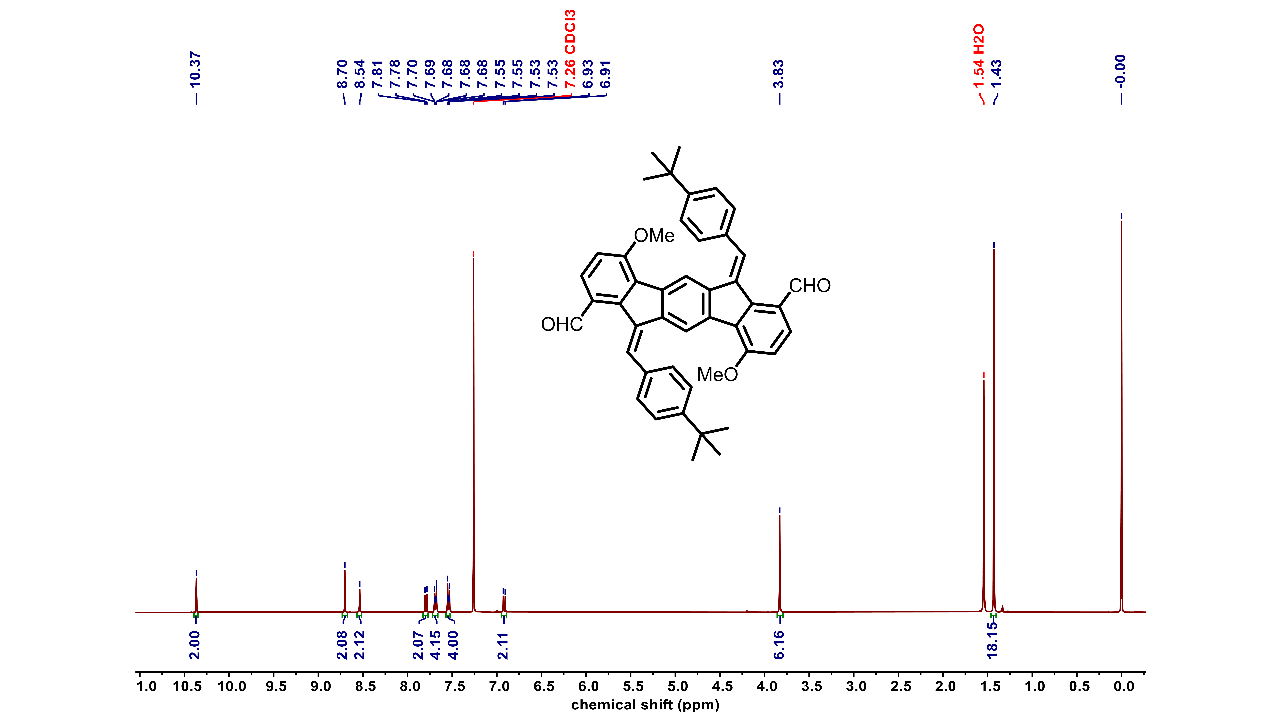


**Figure S65** 1H NMR spectrum of compound **7** (400 MHz, CDCl3, 298 K)


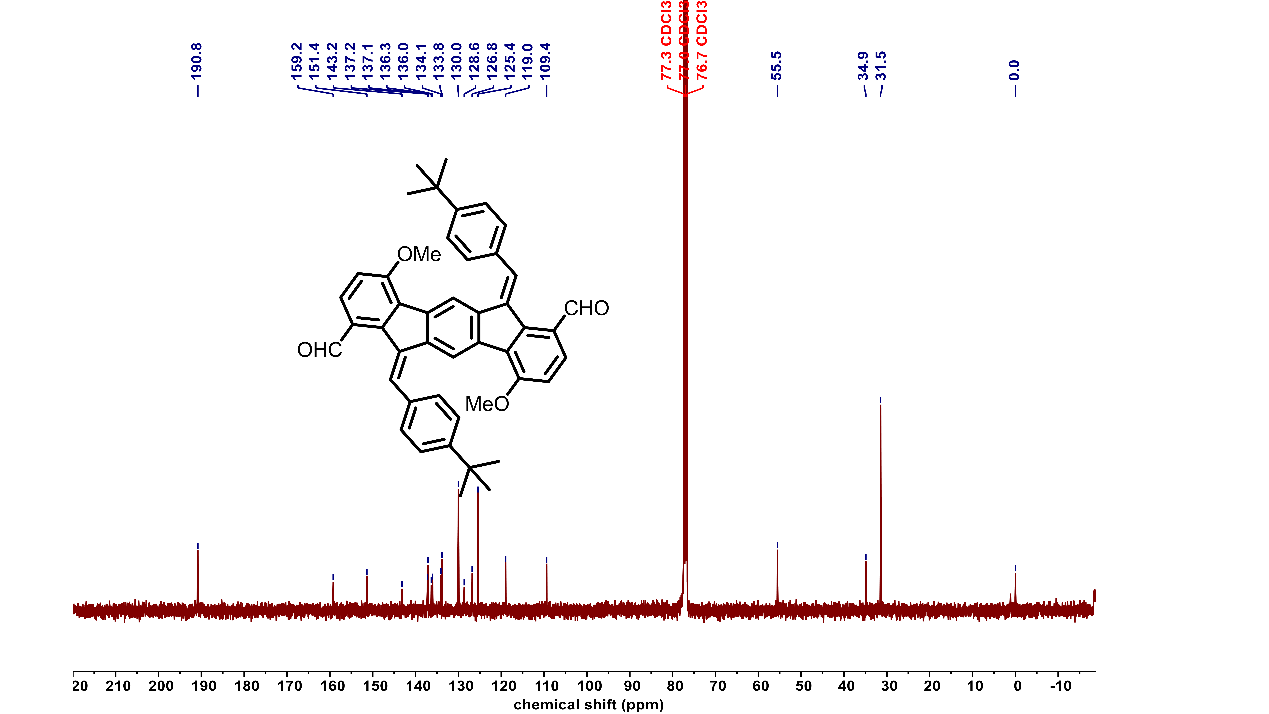


**Figure S66** 13C NMR spectrum of compound **7** (101 MHz, CDCl3, 298 K)


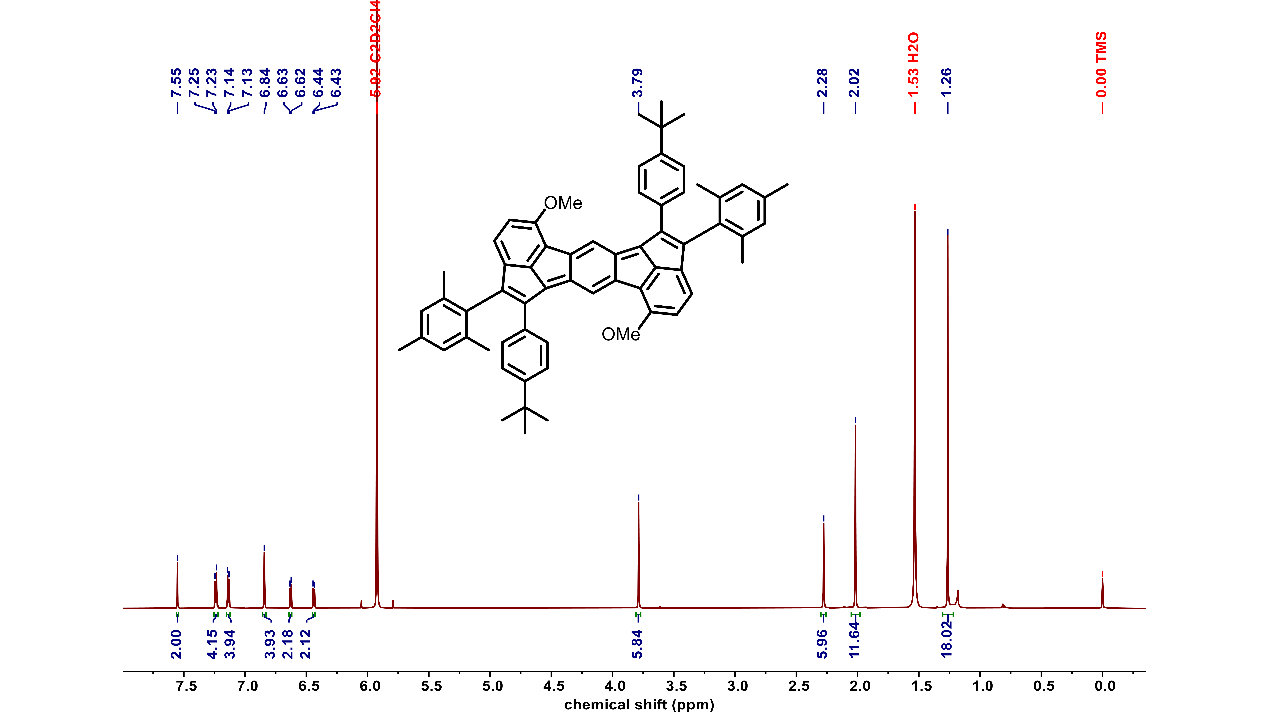


**Figure S67** 1H NMR spectrum of compound **1** (700 MHz, C2D2Cl4, 298 K)


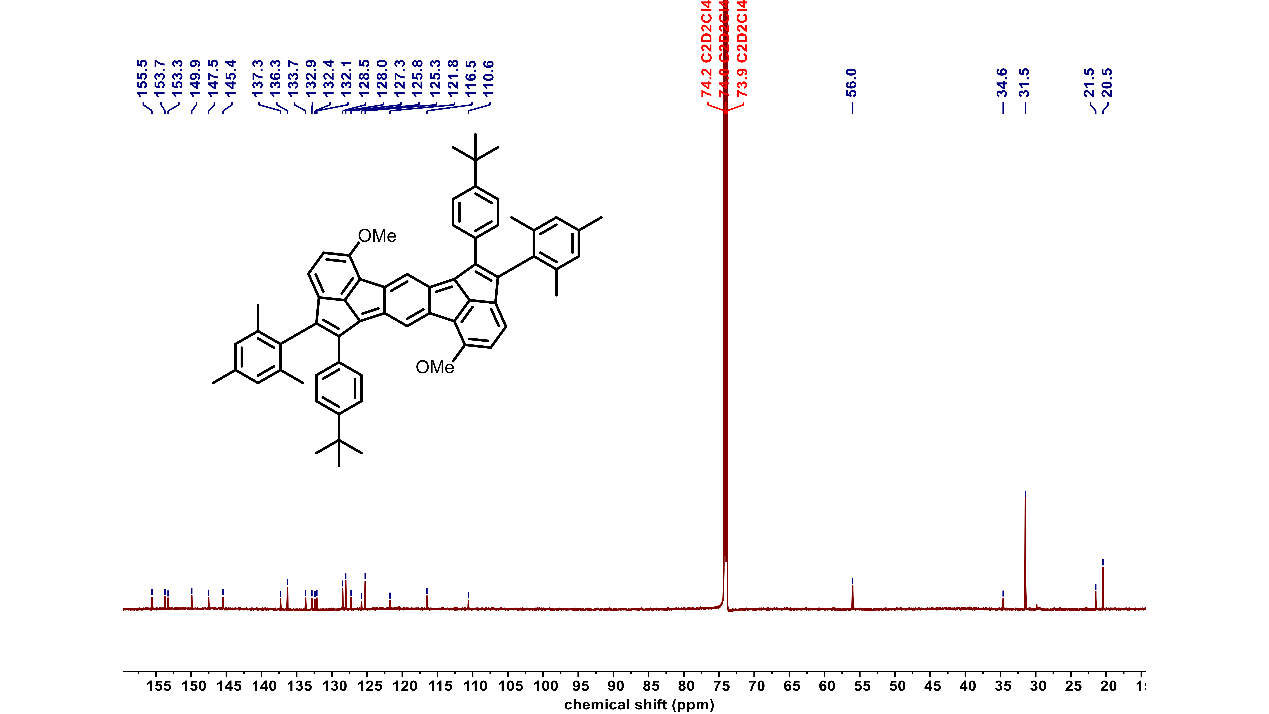


**Figure S68** 13C NMR spectrum of compound **1** (176 MHz, CDCl3, 298 K)


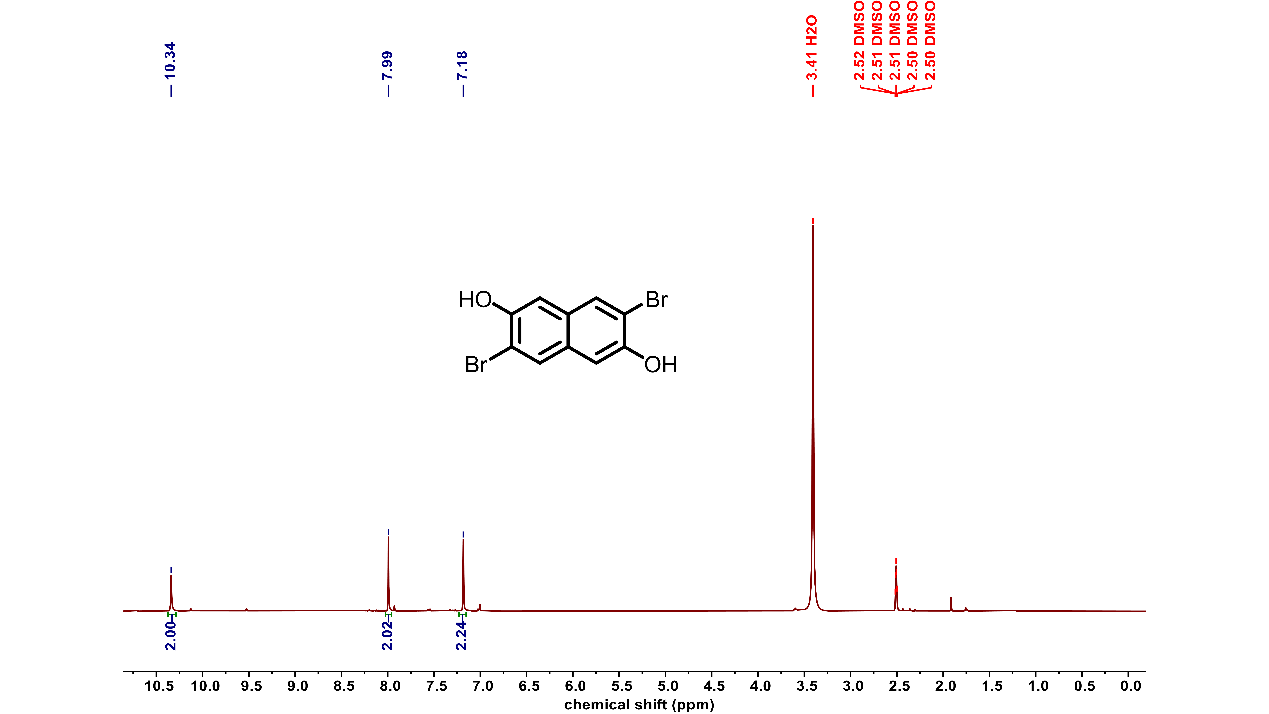


**Figure S69** 1H NMR spectrum of compound **Na-2Br-2OH** (400 MHz, DMSO-*d*6, 298 K)


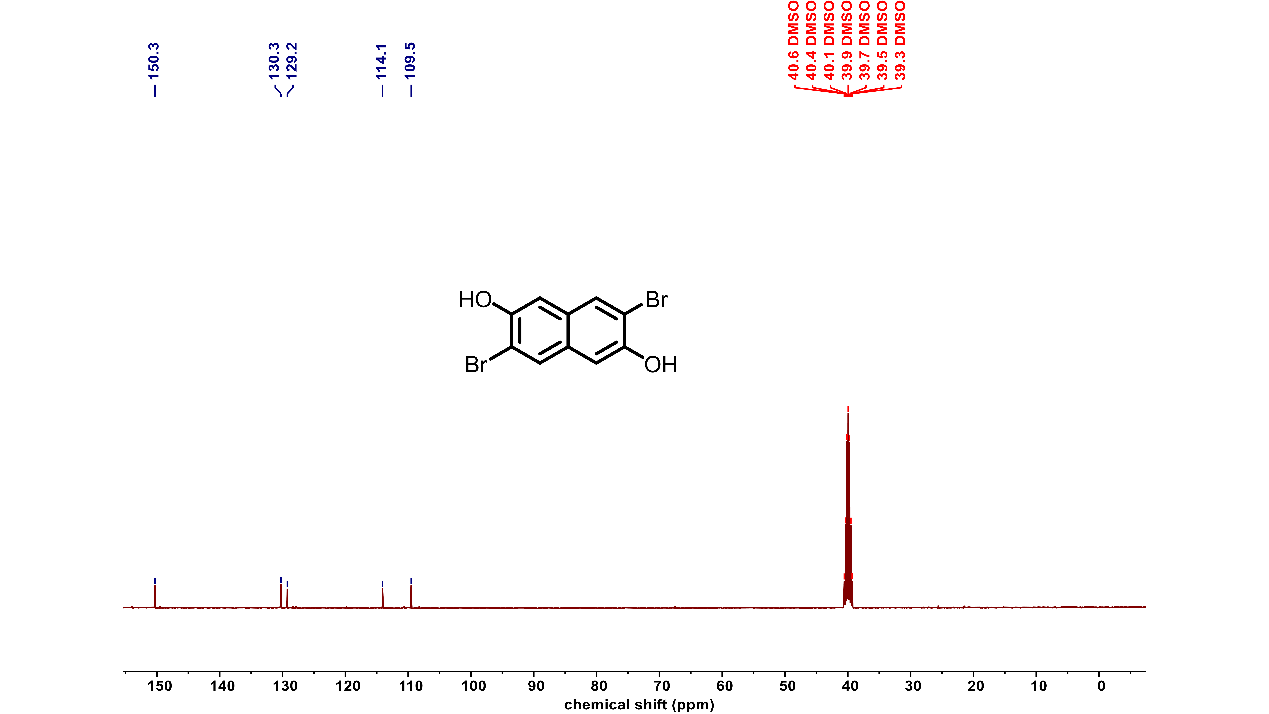


**Figure S70** 13C NMR spectrum of compound **Na-2Br-2OH** (101 MHz, DMSO-*d*6, 298 K)


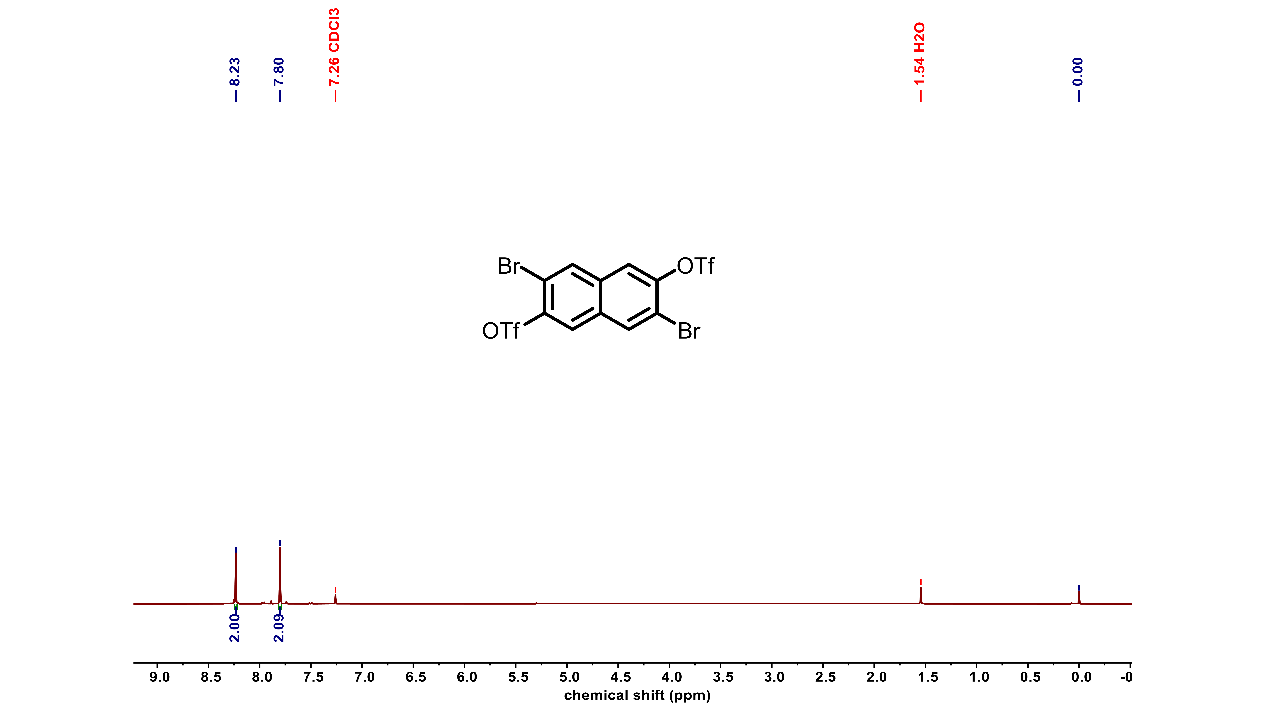


**Figure S71** 1H NMR spectrum of compound **10** (400 MHz, CDCl3, 298 K)


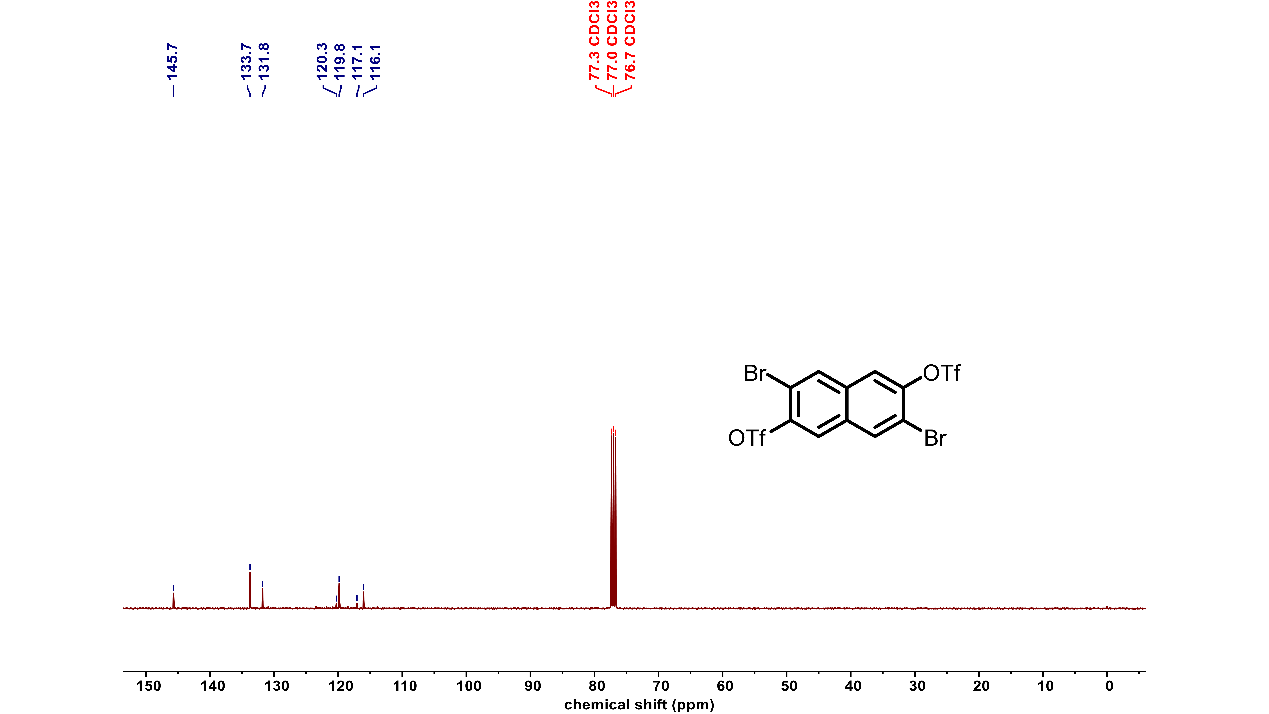


**Figure S72** 13C NMR spectrum of compound **10** (101 MHz, CDCl3, 298 K)


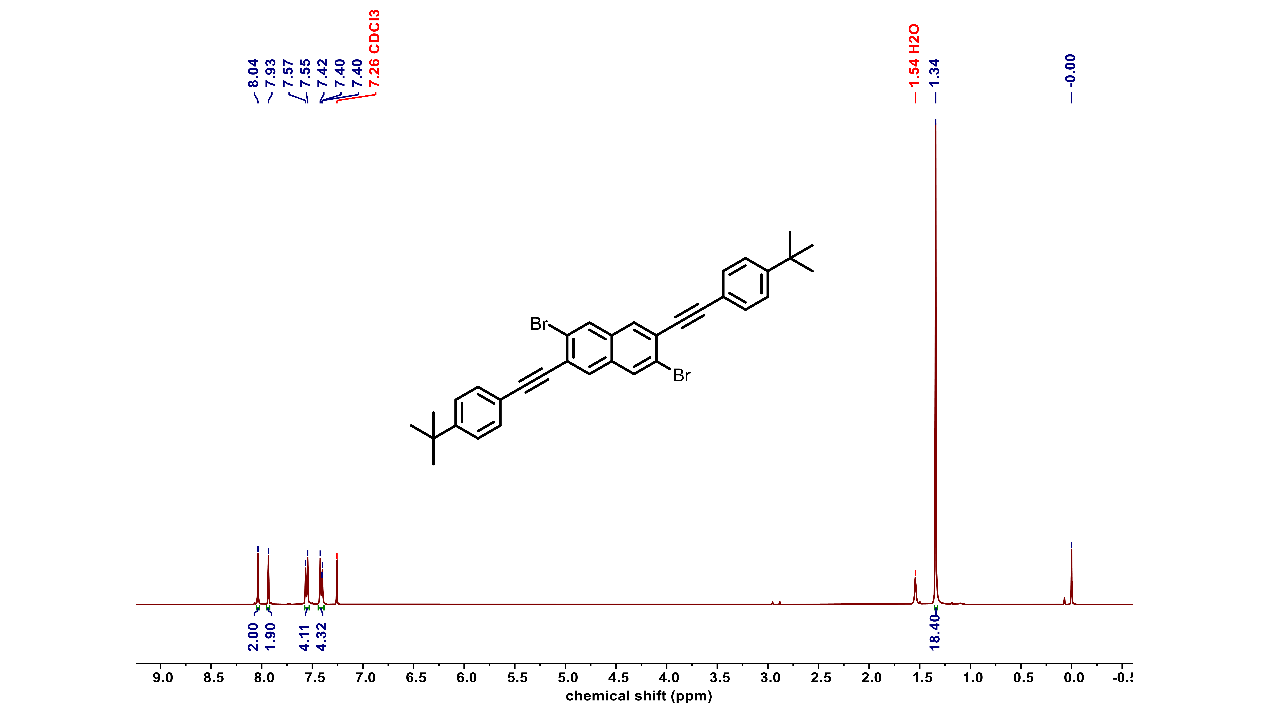


**Figure S73** 1H NMR spectrum of compound **11** (400 MHz, CDCl3, 298 K)


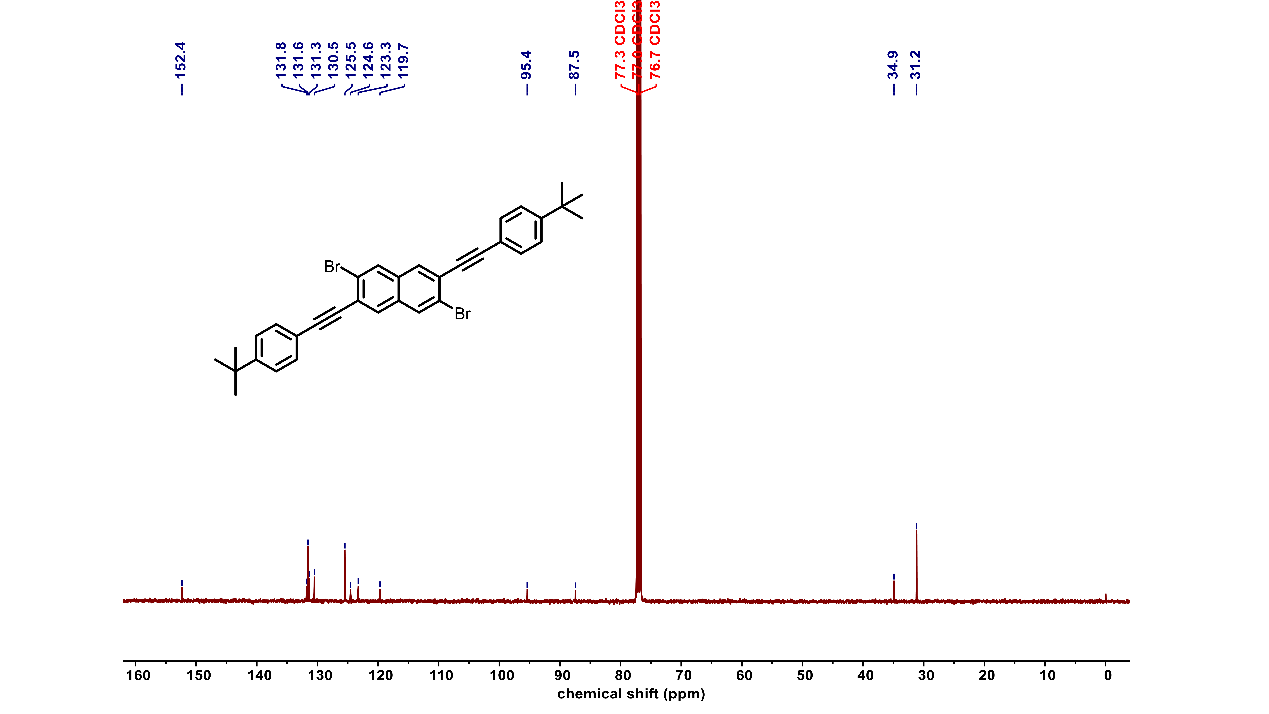


**Figure S74** 13C NMR spectrum of compound **11** (101 MHz, CDCl3, 298 K)


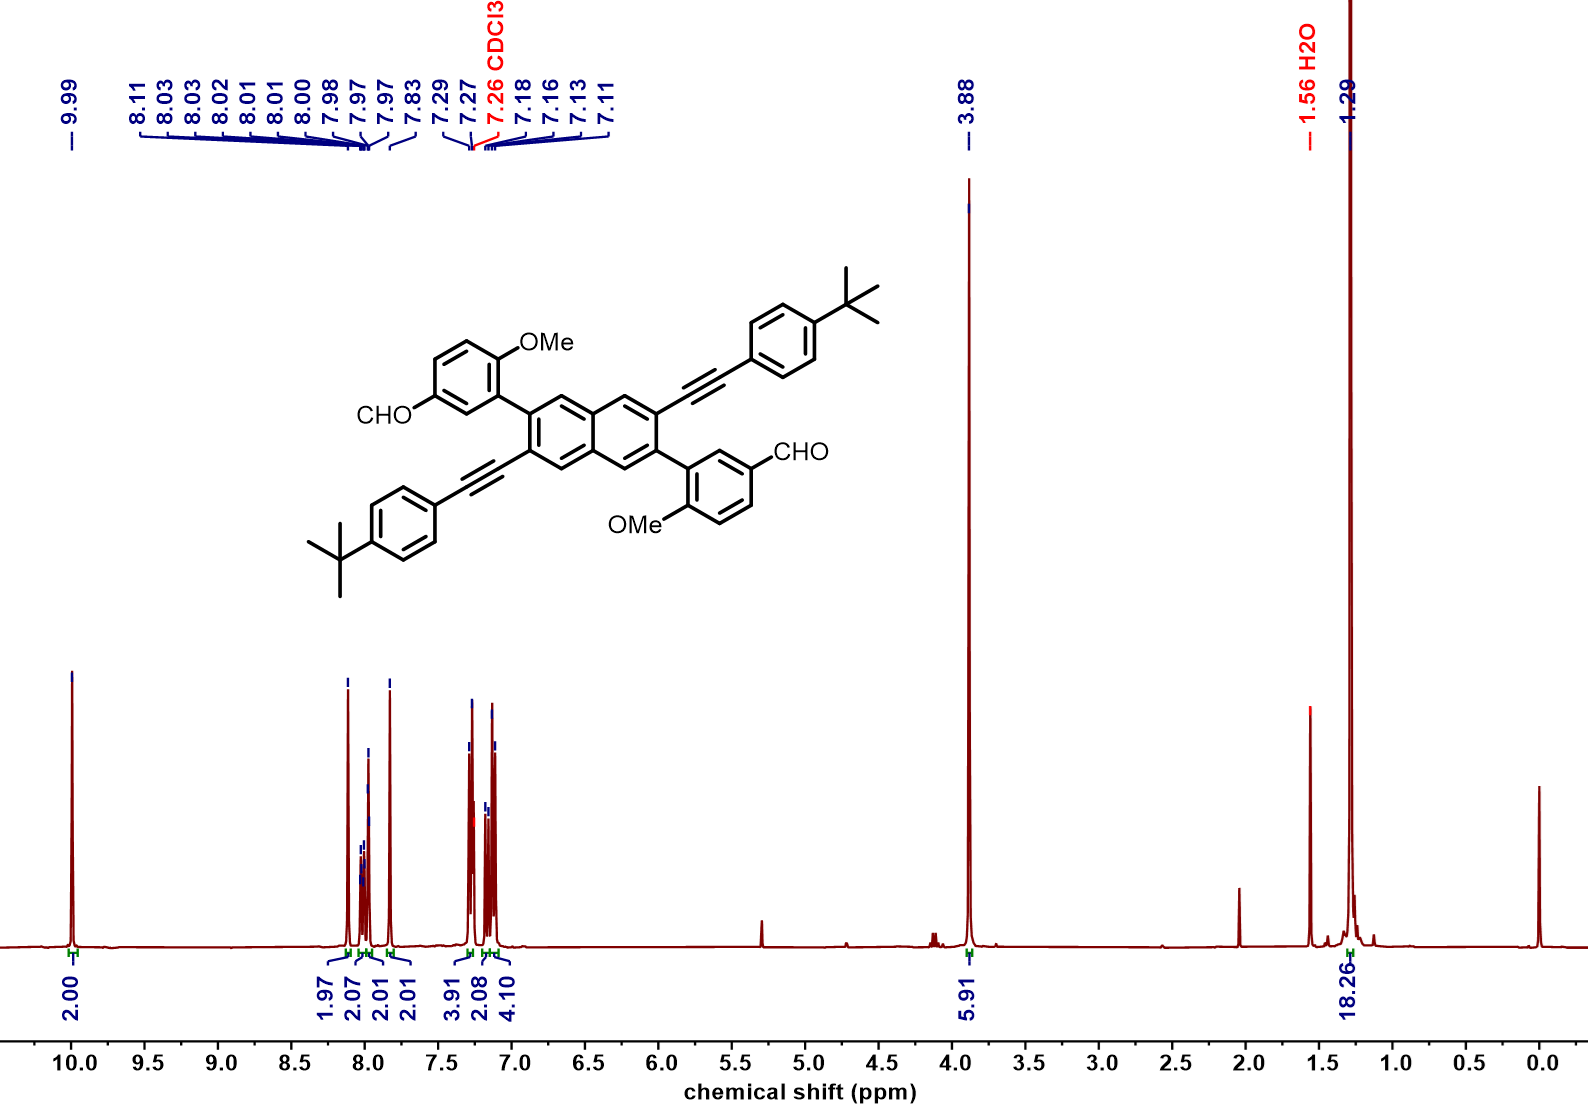


**Figure S75** 1H NMR spectrum of compound **12** (400 MHz, CDCl3, 298 K)


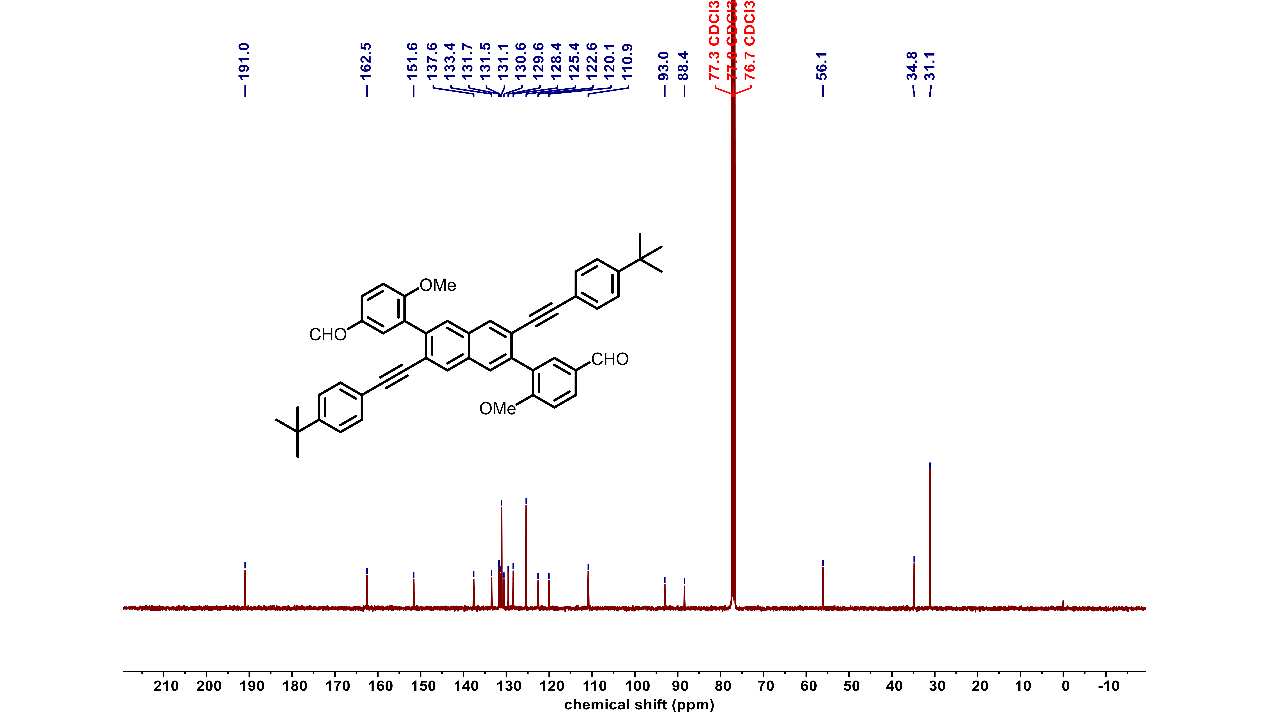


**Figure S76** 13C NMR spectrum of compound **12** (101 MHz, CDCl3, 298 K)


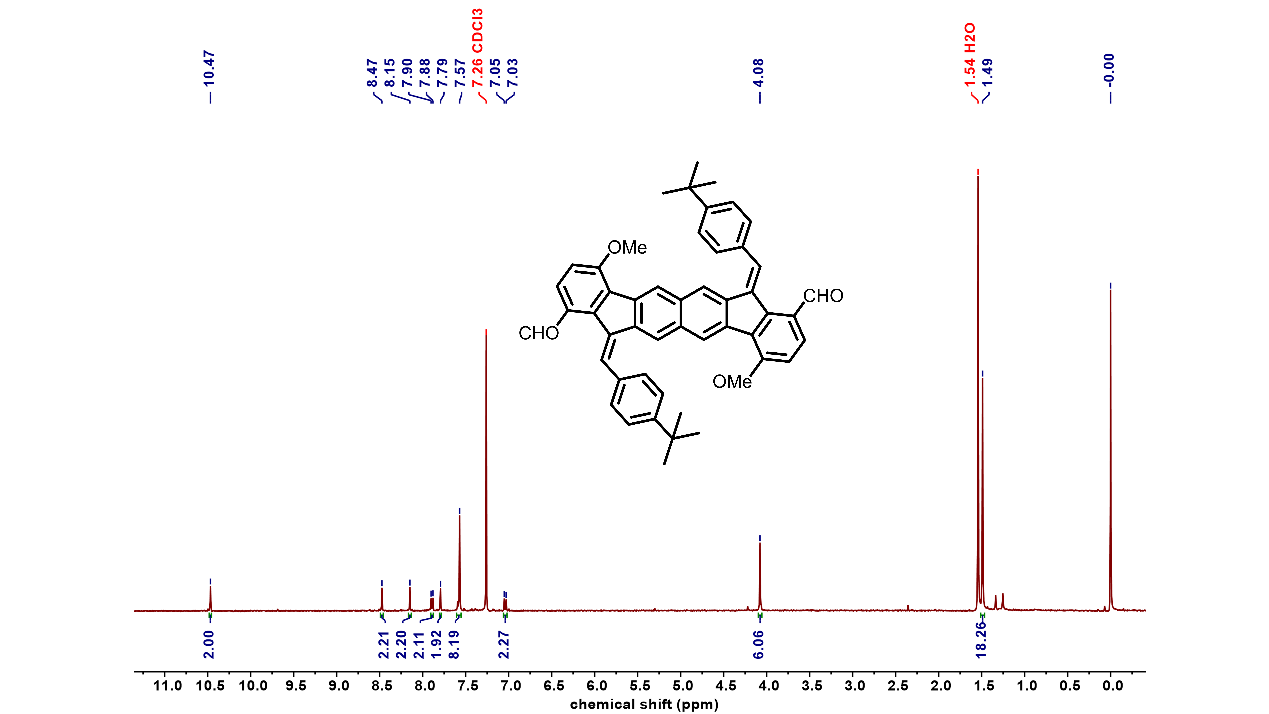


**Figure S77** 1H NMR spectrum of compound **13** (400 MHz, CDCl3, 298 K)


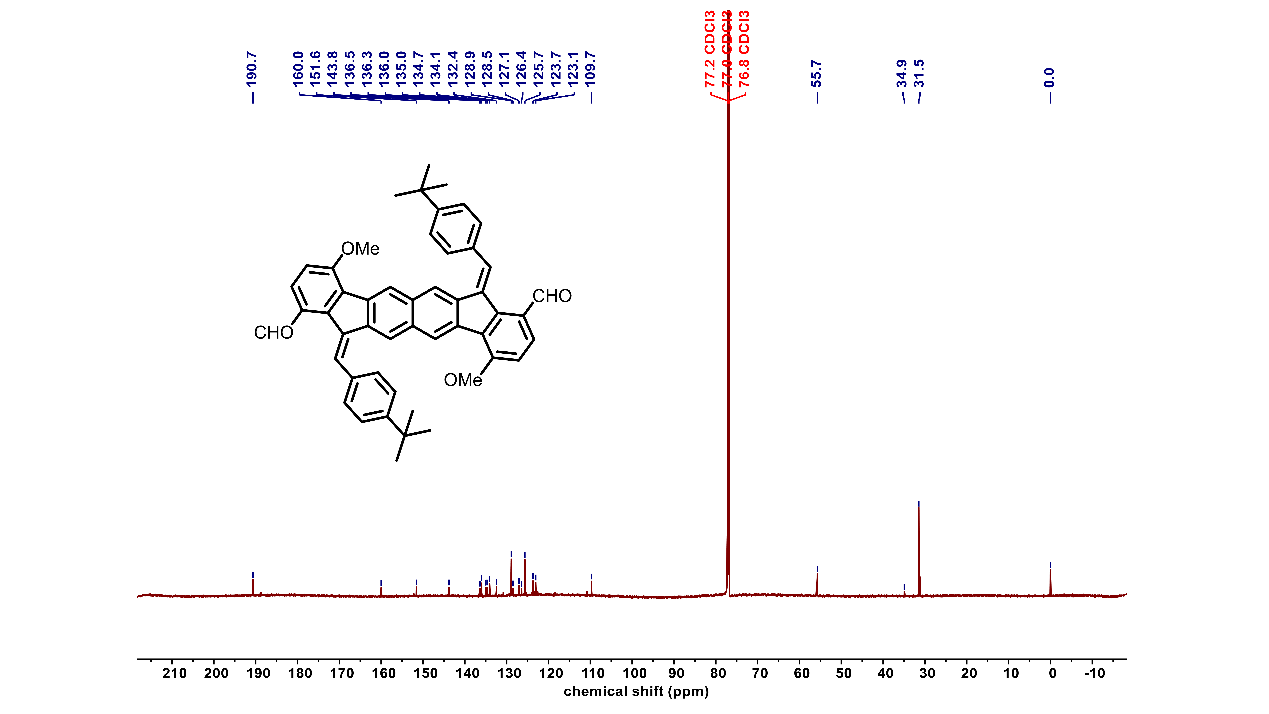


**Figure S78** 13C NMR spectrum of compound **13** (101 MHz, CDCl3, 298 K)


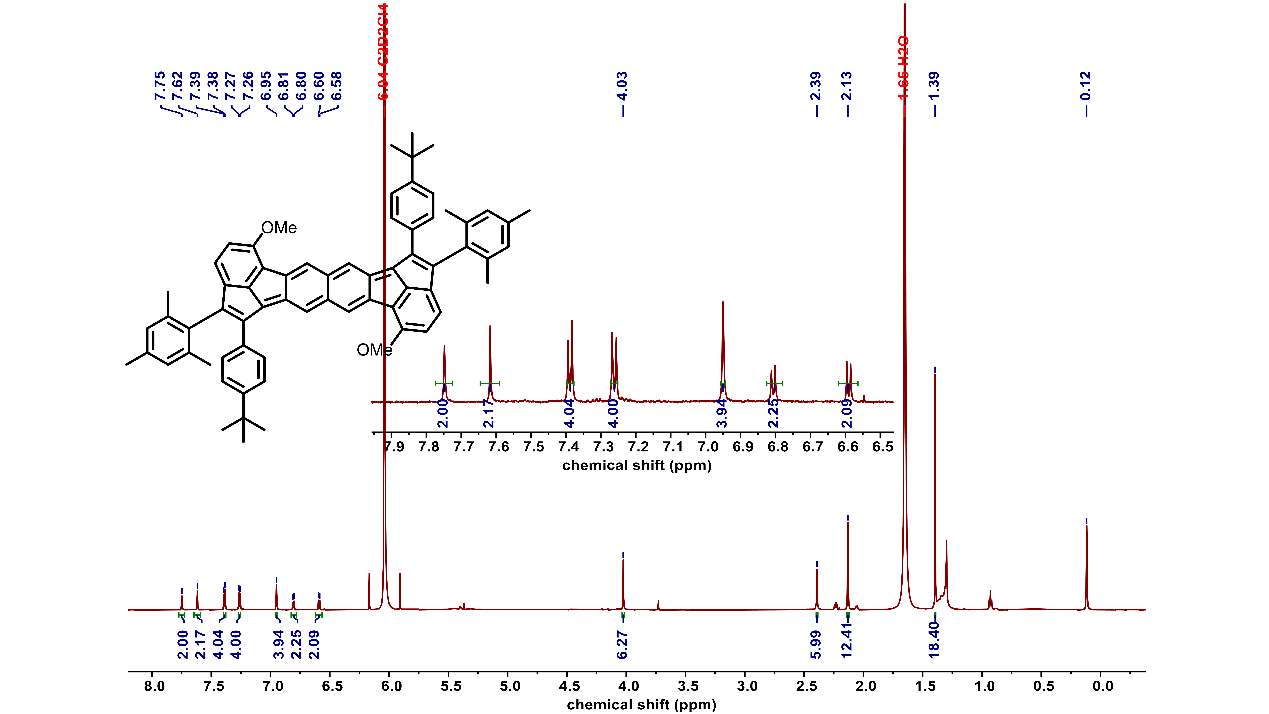


**Figure S79** 1H NMR spectrum of compound **2** (700 MHz, C2D2Cl4, 298 K)


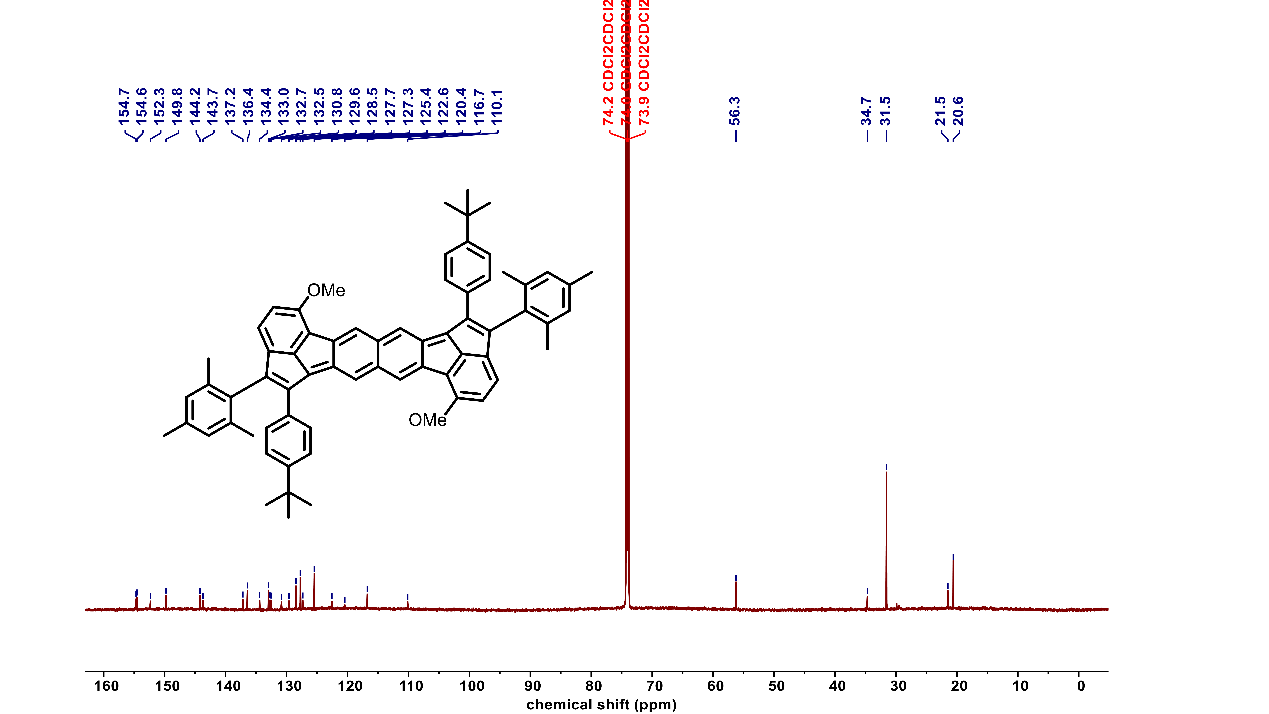


**Figure S80** 13C NMR spectrum of compound **2** (176 MHz, C2D2Cl4, 298 K)


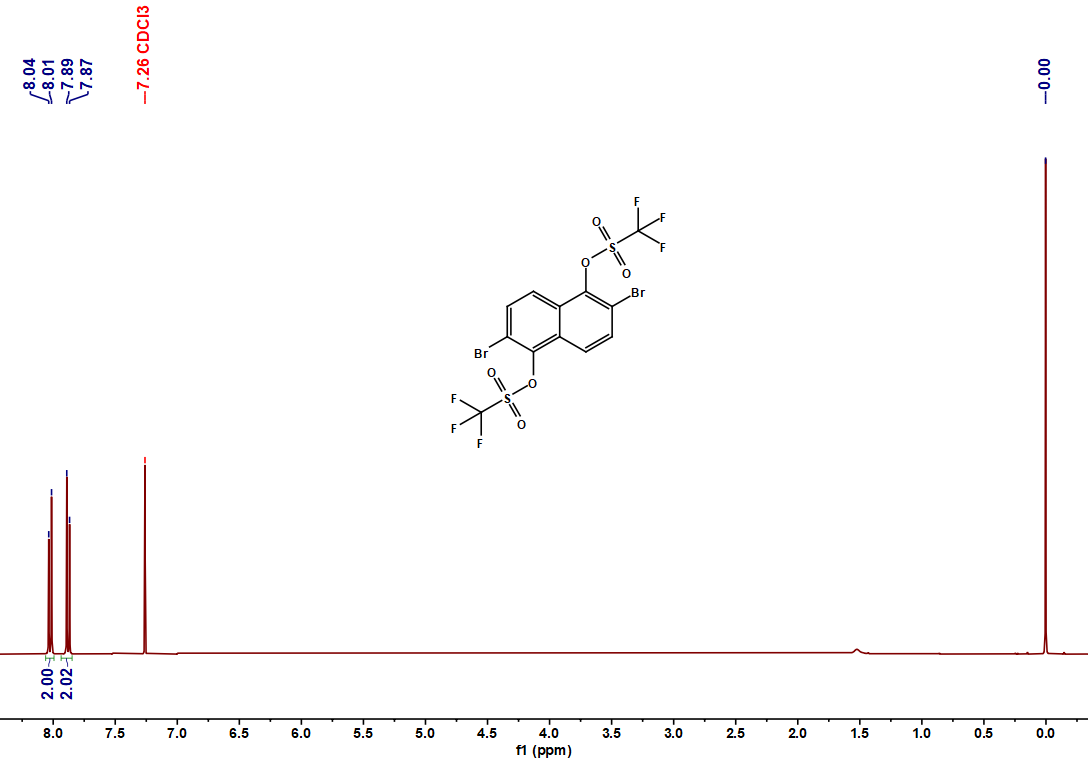


**Figure S81** 1H NMR spectrum of compound **16** (400 MHz, CDCl3, 298 K)


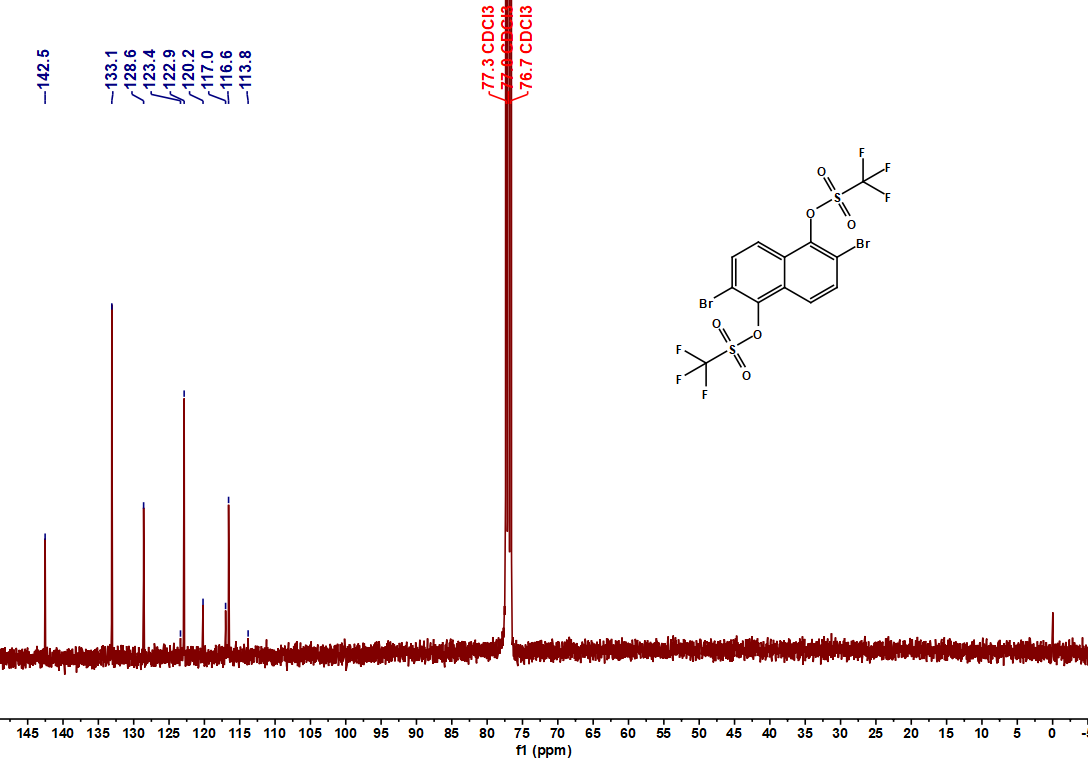


**Figure S82** 13C NMR spectrum of compound **16** (101 MHz, CDCl3, 298 K)


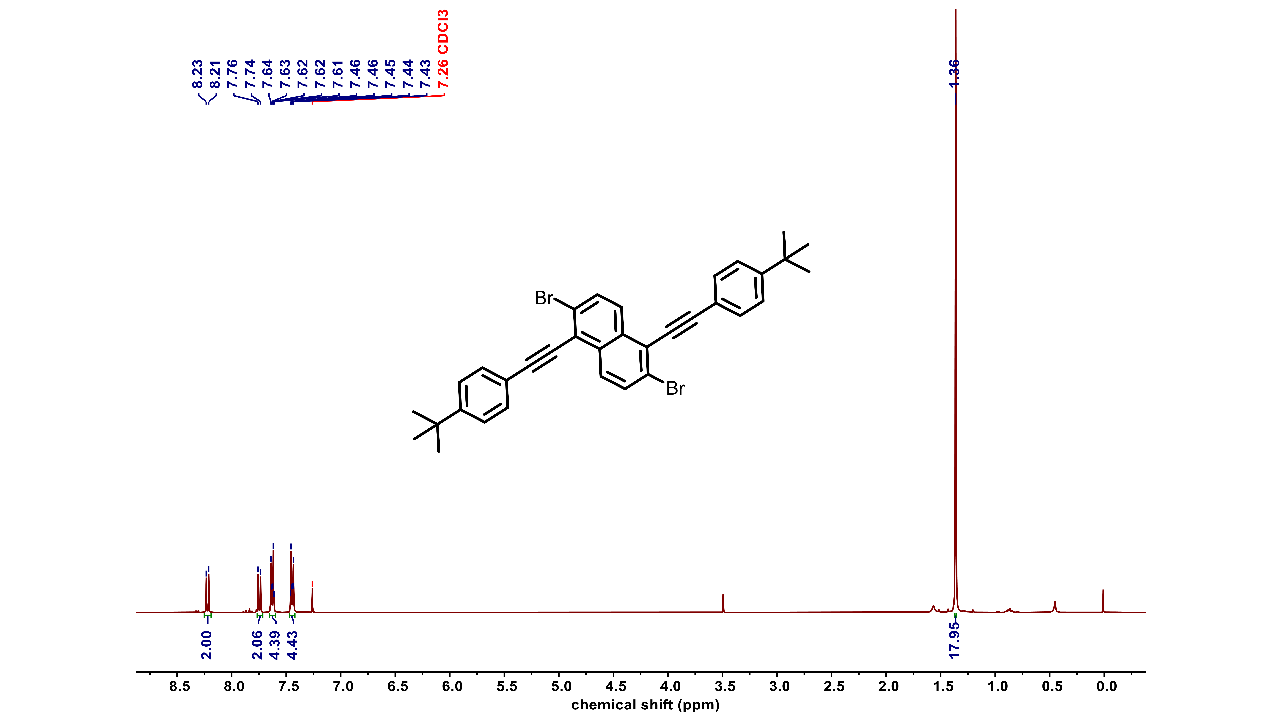


**Figure S83** 1H NMR spectrum of compound **17** (400 MHz, CDCl3, 298 K)


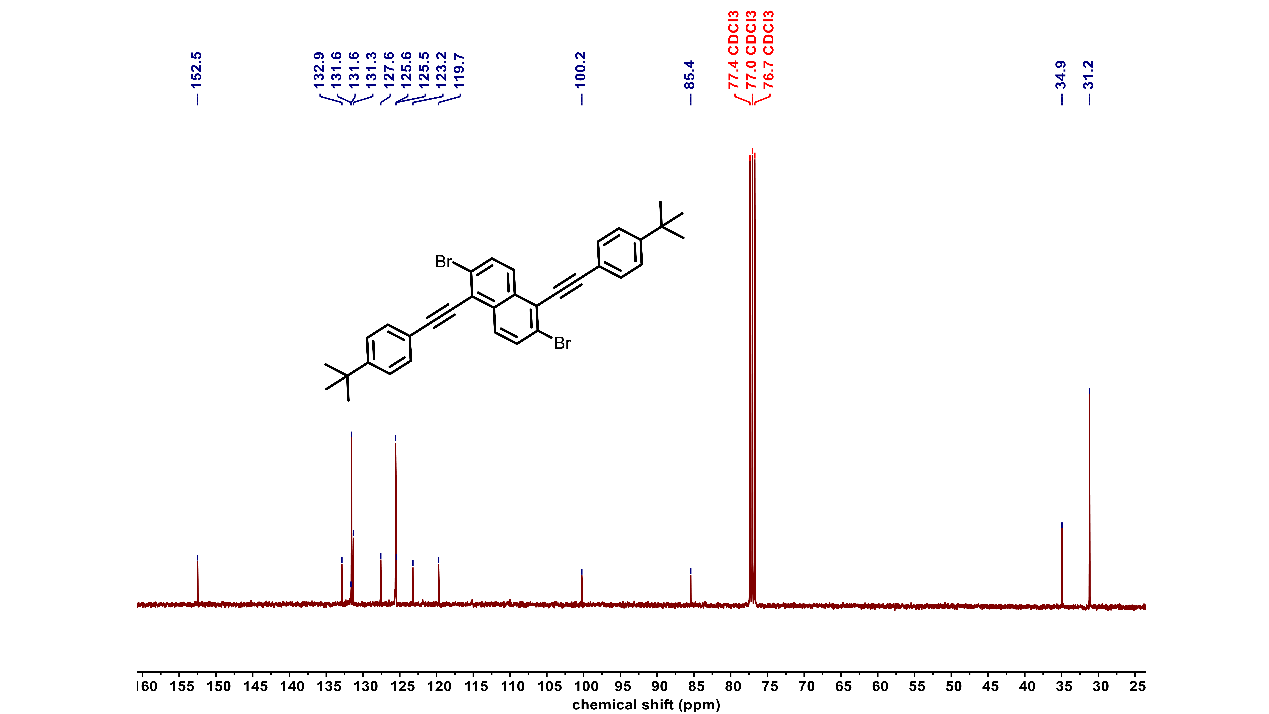


**Figure S84** 13C NMR spectrum of compound **17** (101 MHz, CDCl3, 298 K)


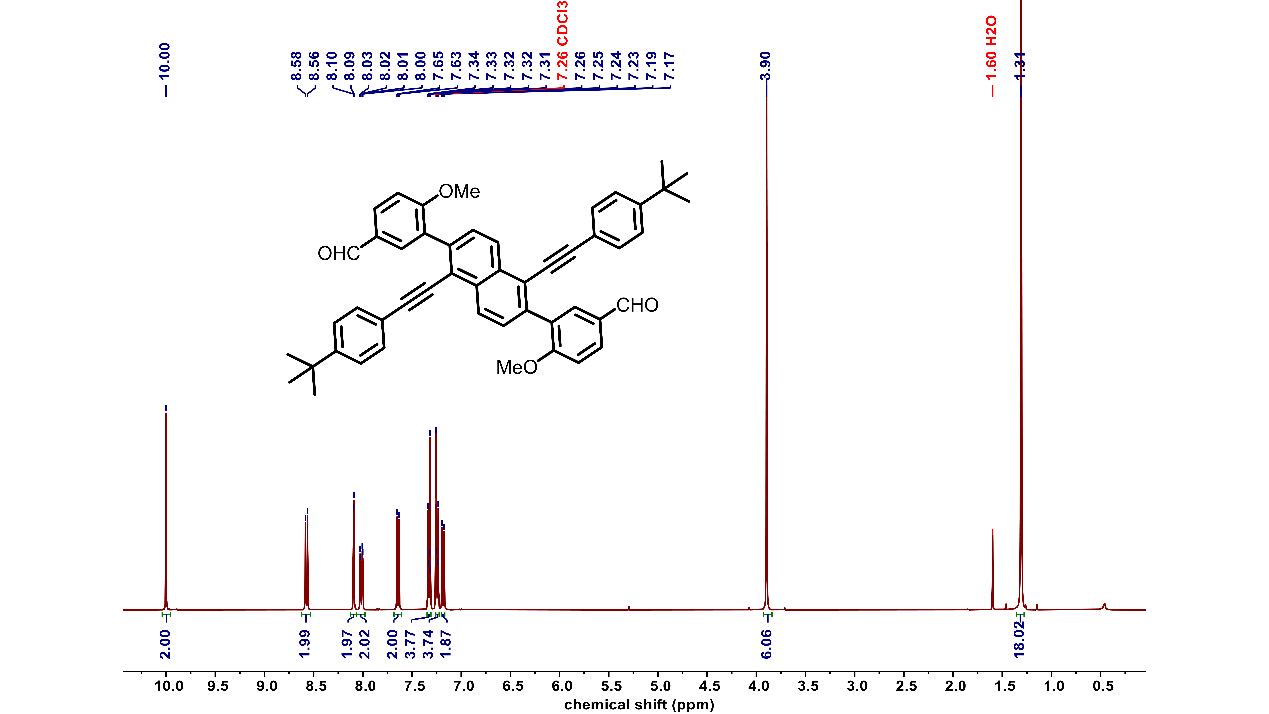


**Figure S85** 1H NMR spectrum of compound **18** (400 MHz, CDCl3, 298 K)


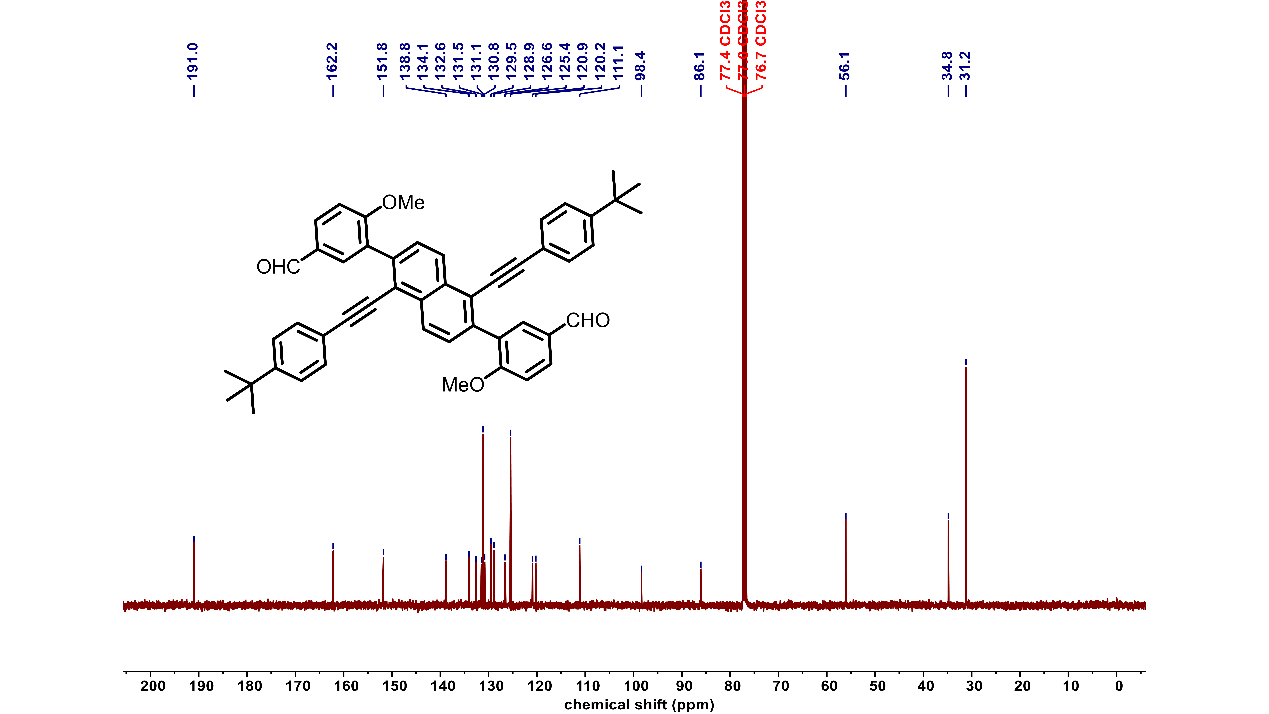


**Figure S86** 13C NMR spectrum of compound **18** (101 MHz, CDCl3, 298 K)


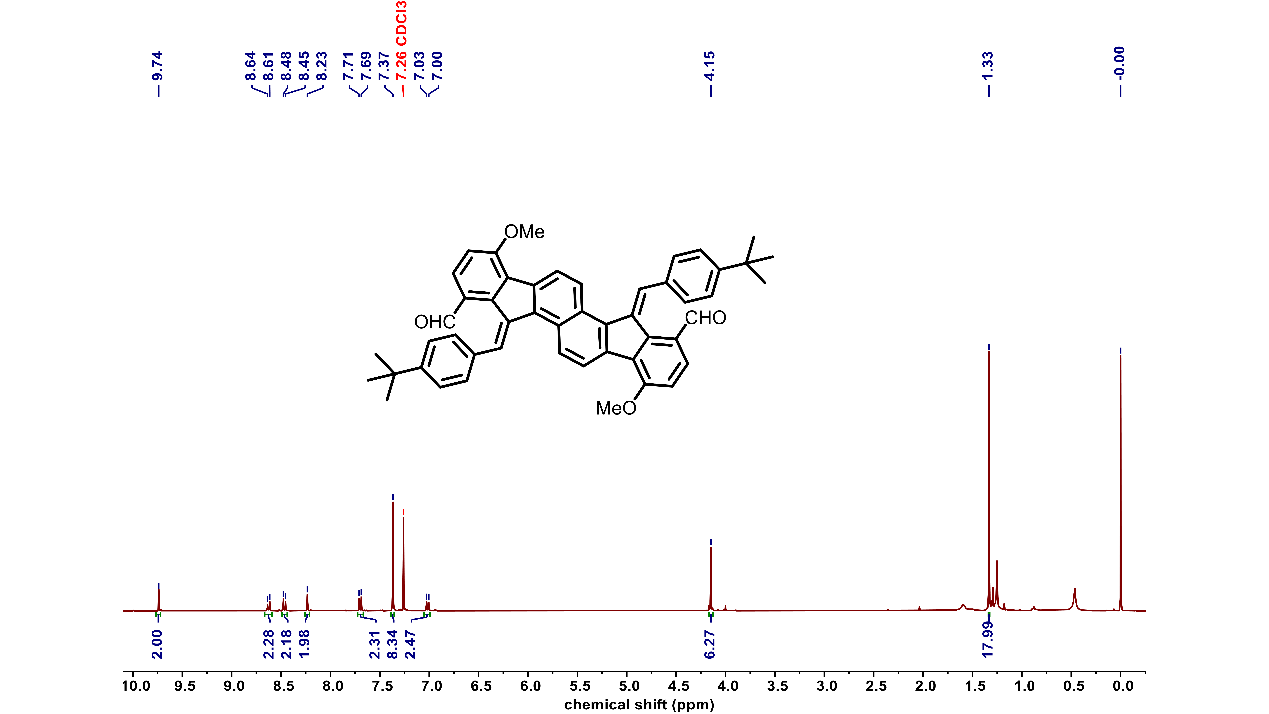


**Figure S87** 1H NMR spectrum of compound **19** (400 MHz, CDCl3, 298 K)


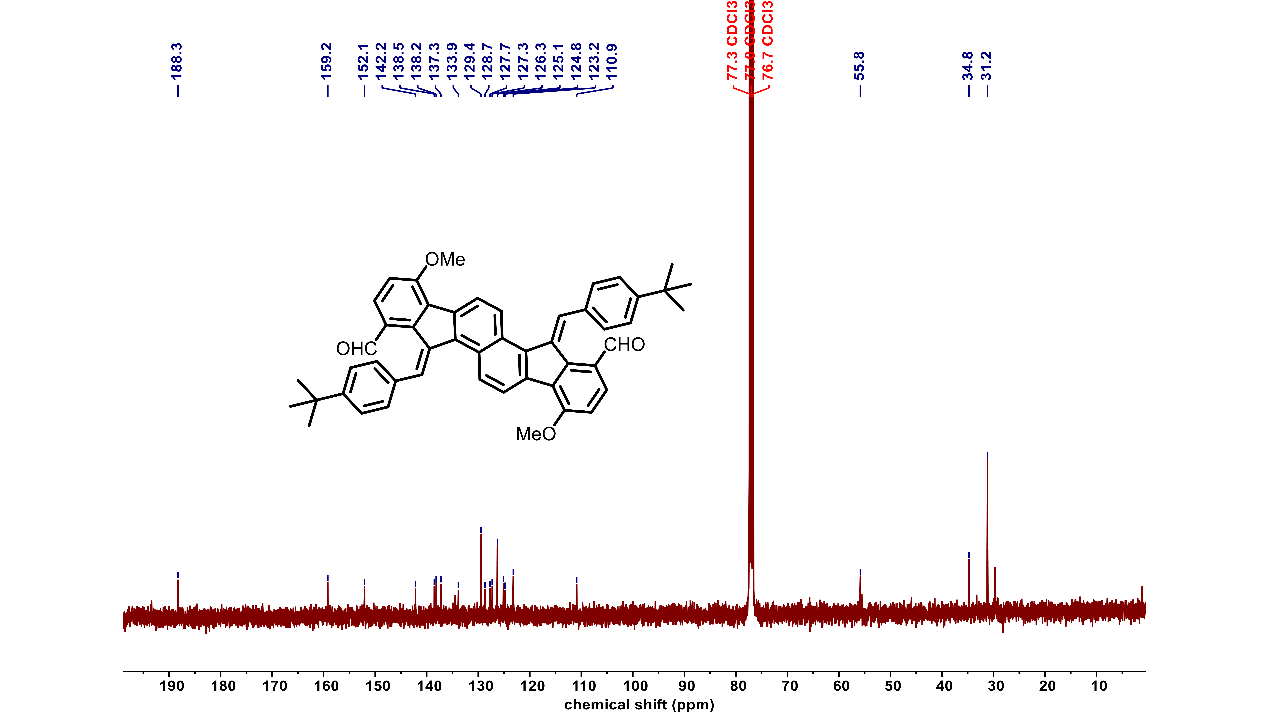


**Figure S88** 13C NMR spectrum of compound **19** (101 MHz, CDCl3, 298 K)


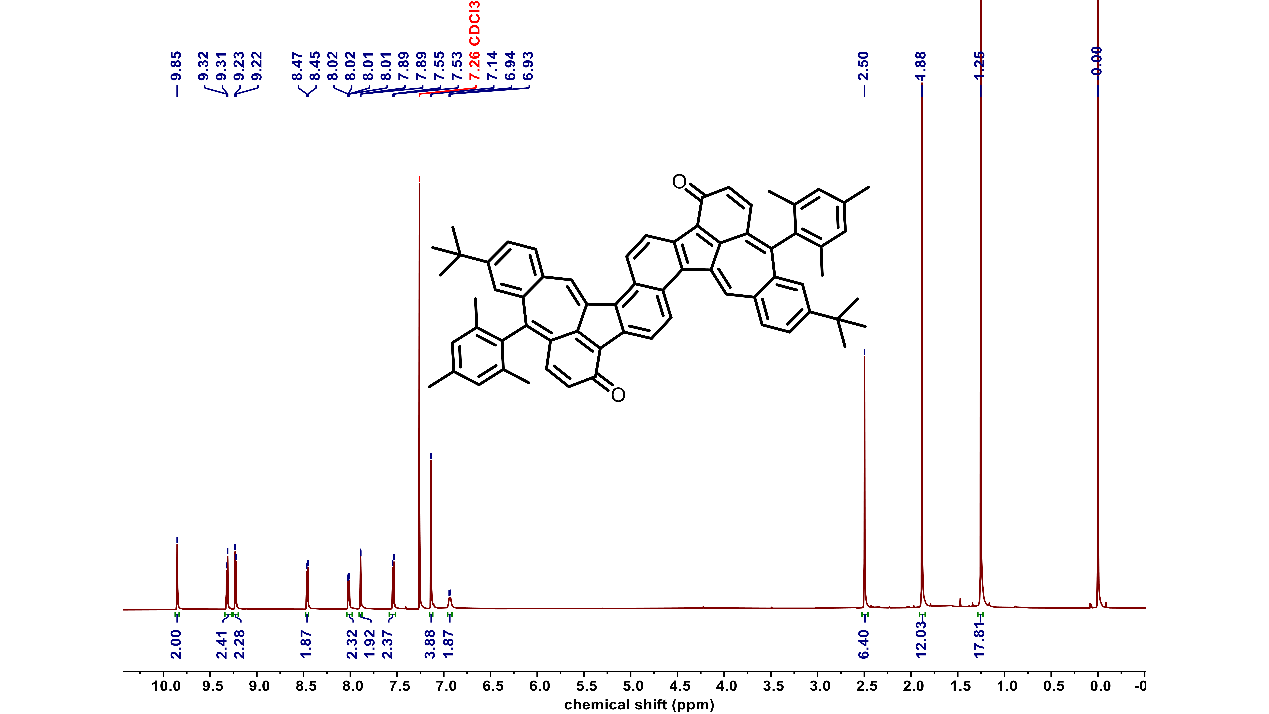


**Figure S89** 1H NMR spectrum of compound **3** (400 MHz, CDCl3, 298 K)


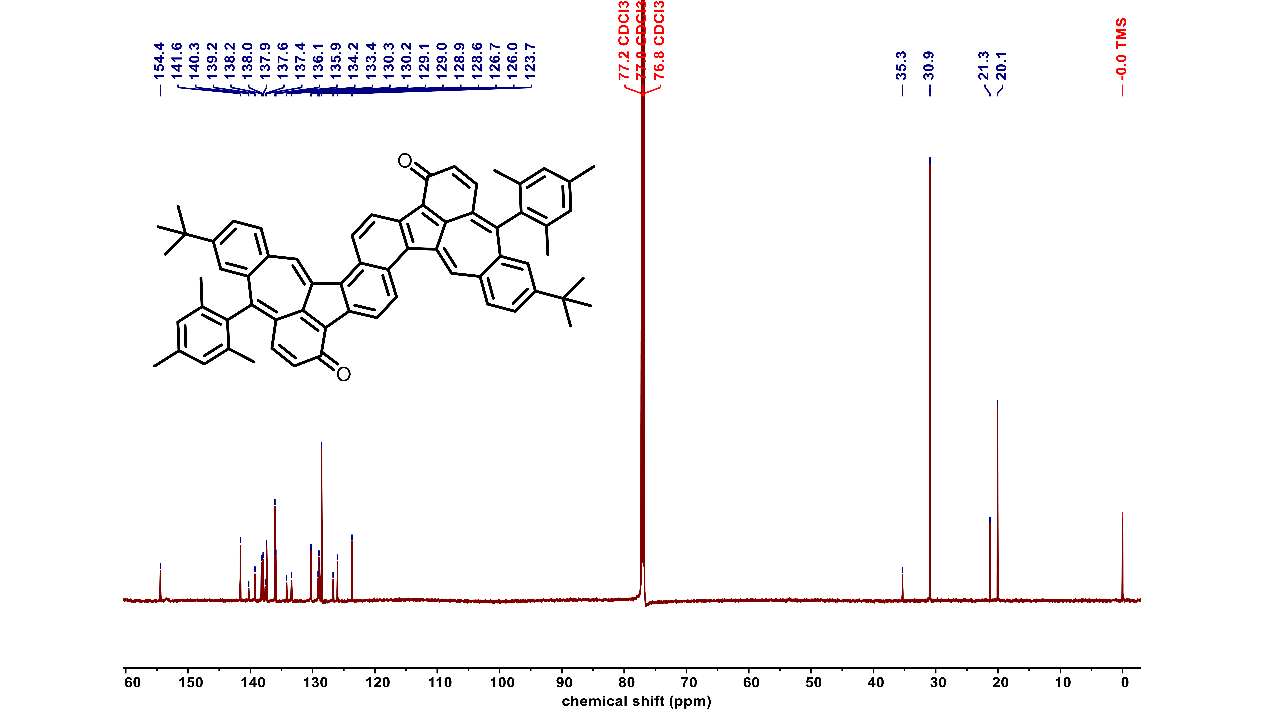


**Figure S90** 13C NMR spectrum of compound **3** (101 MHz, CDCl3, 298 K)


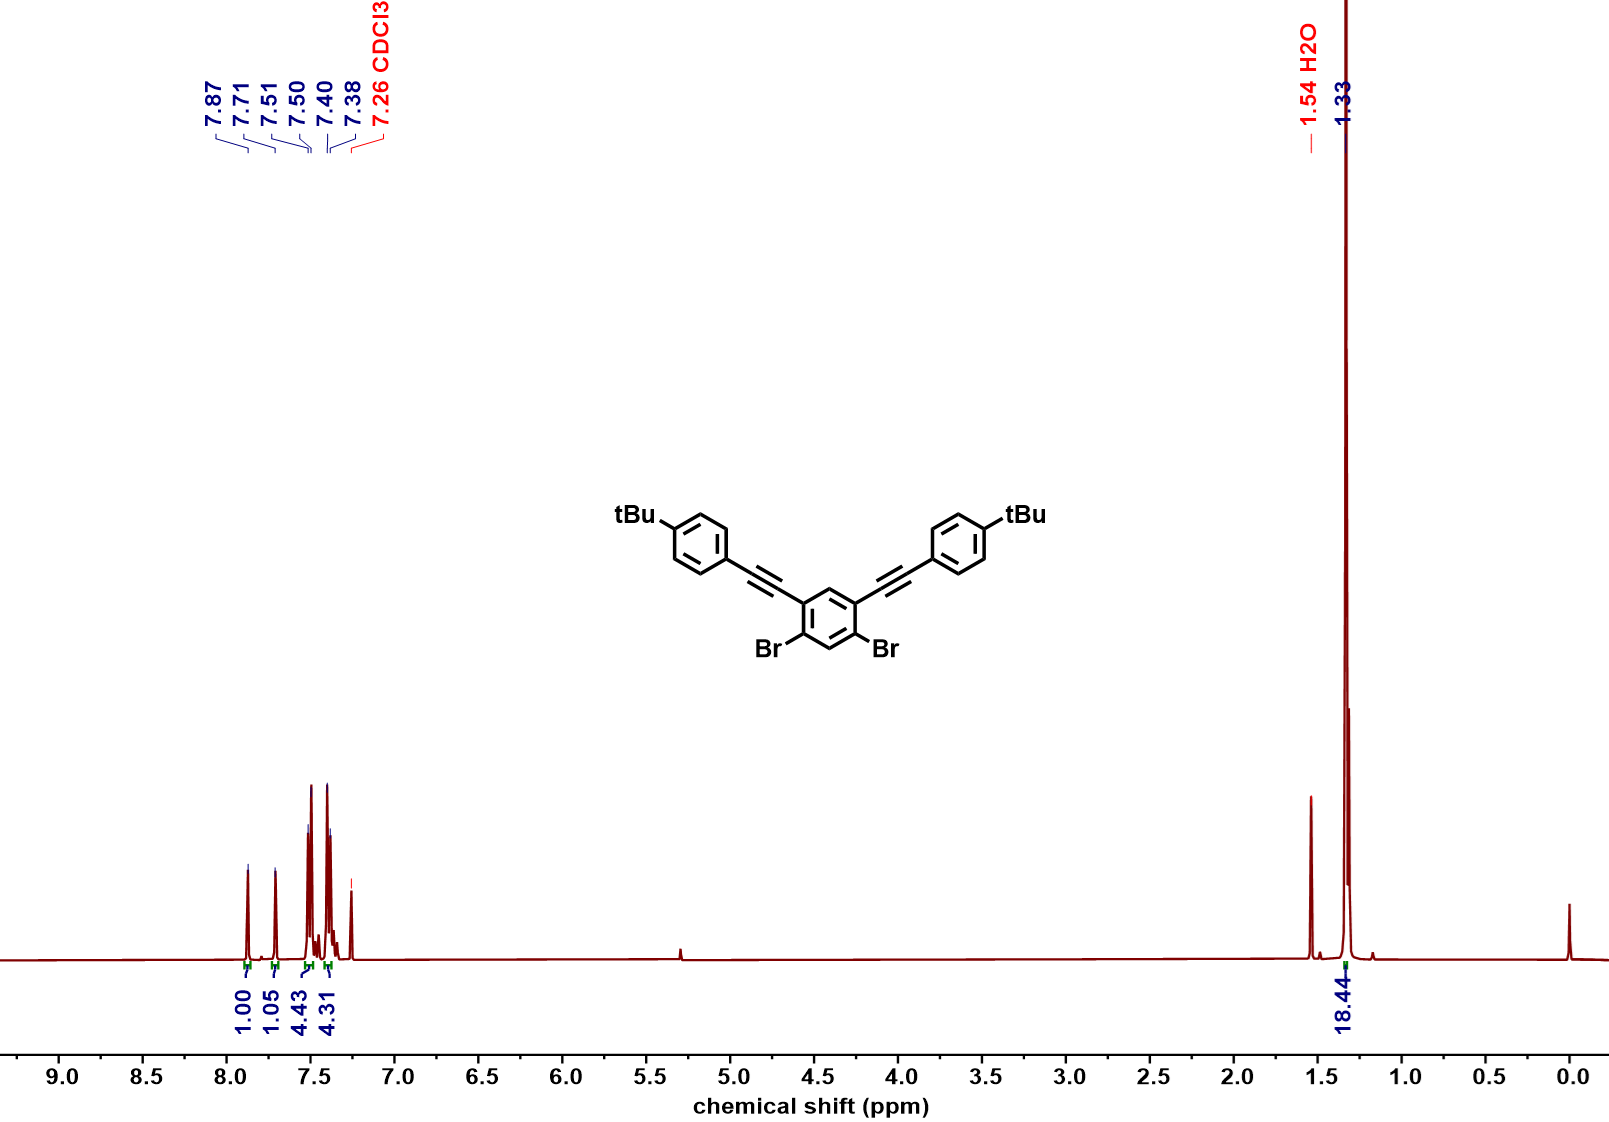


**Figure S91** 1H NMR spectrum of compound **Ph-Yne** (400 MHz, CDCl3, 298 K)


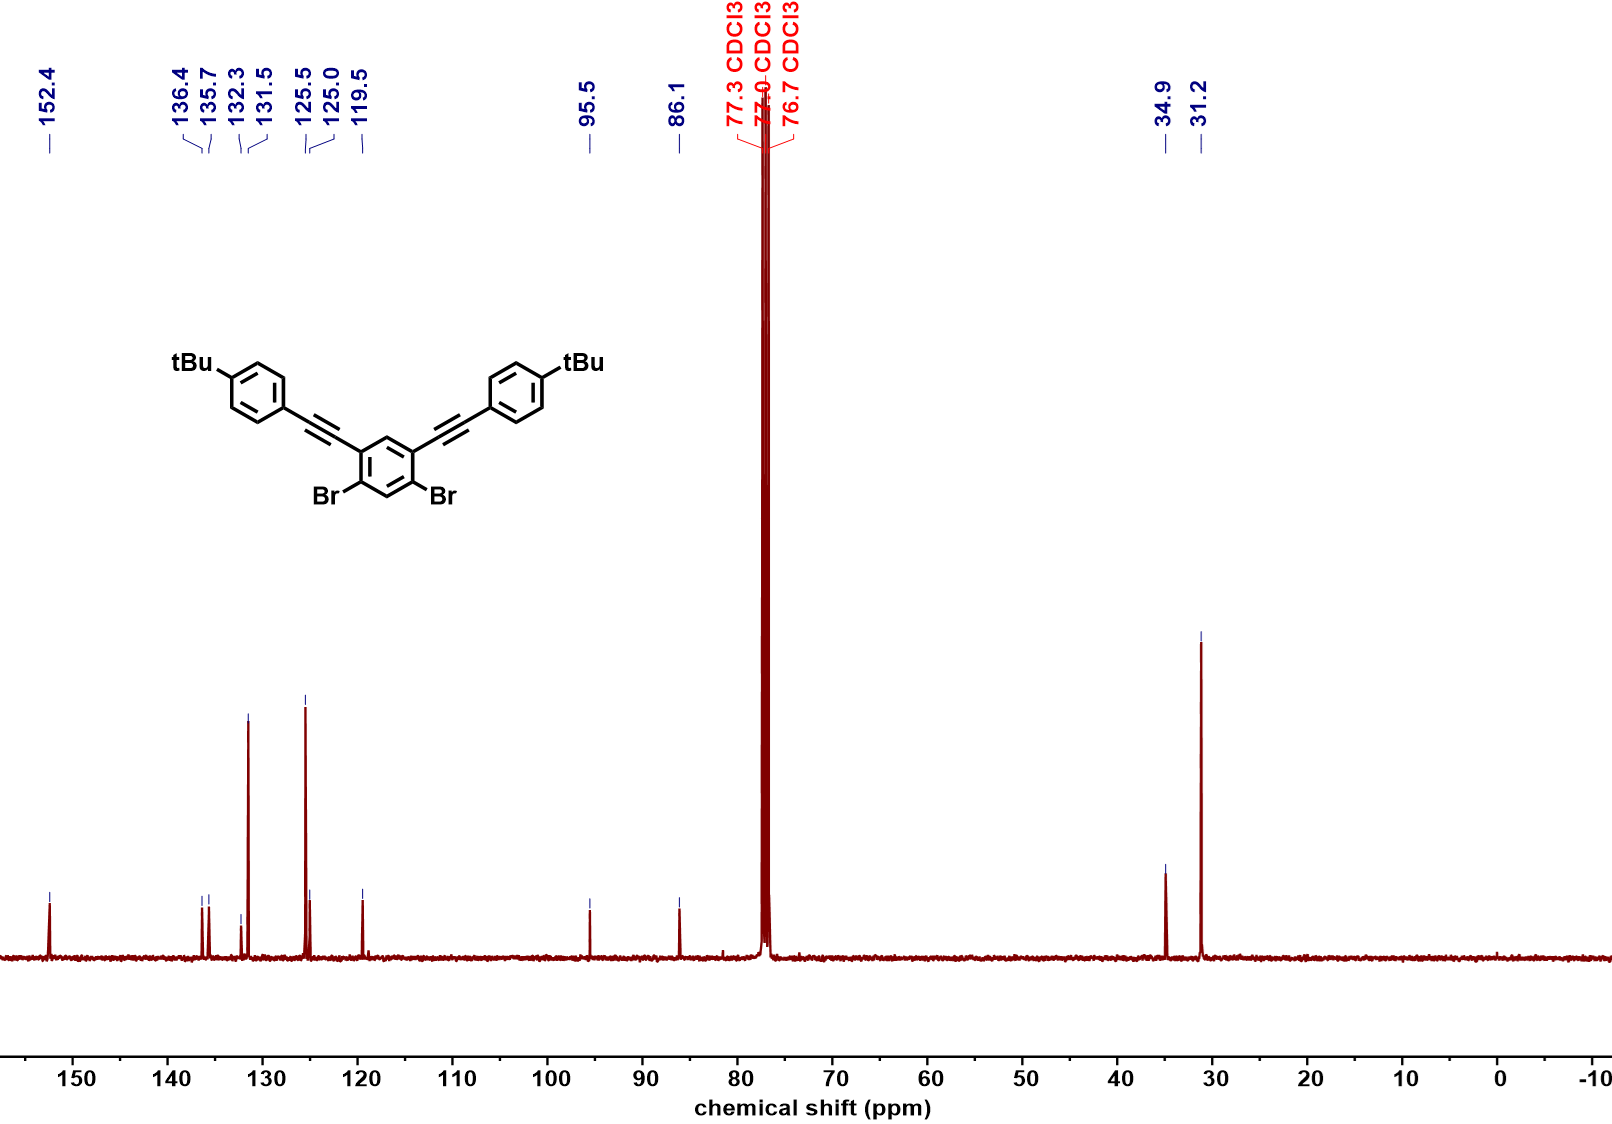


**Figure S92** 13C NMR spectrum of compound **Ph-Yne** (101 MHz, CDCl3, 298 K)


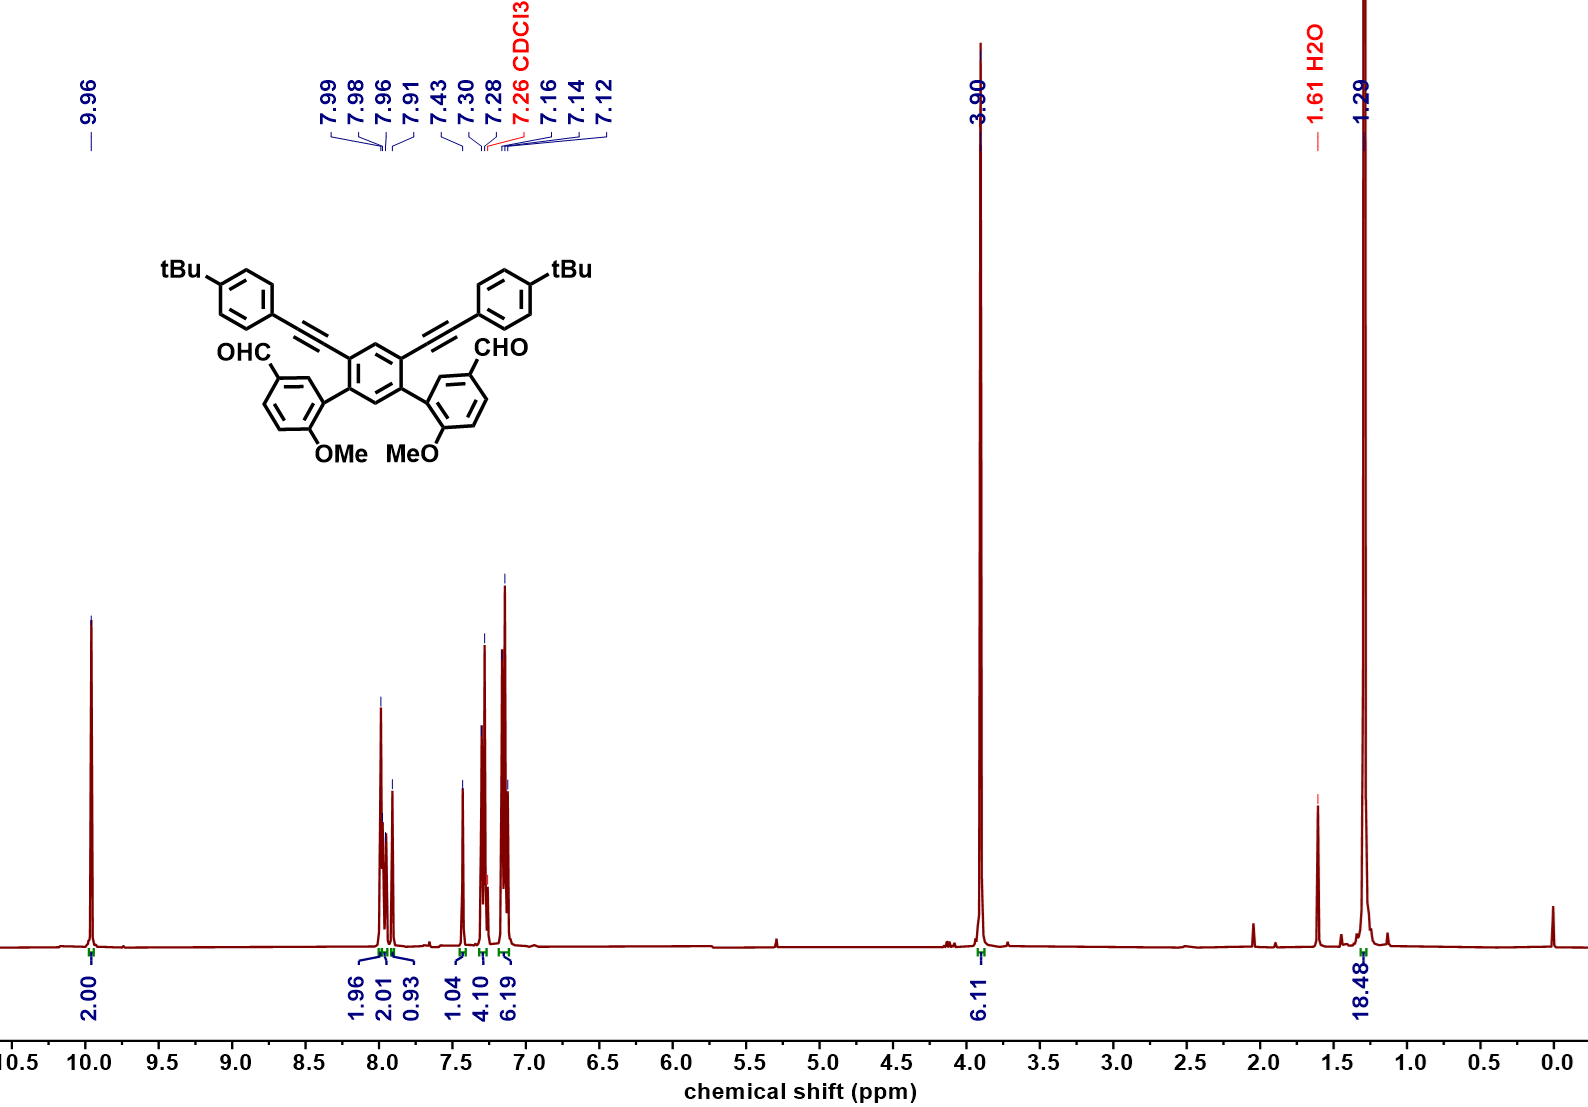


**Figure S93** 1H NMR spectrum of compound **22a** (400 MHz, CDCl3, 298 K)


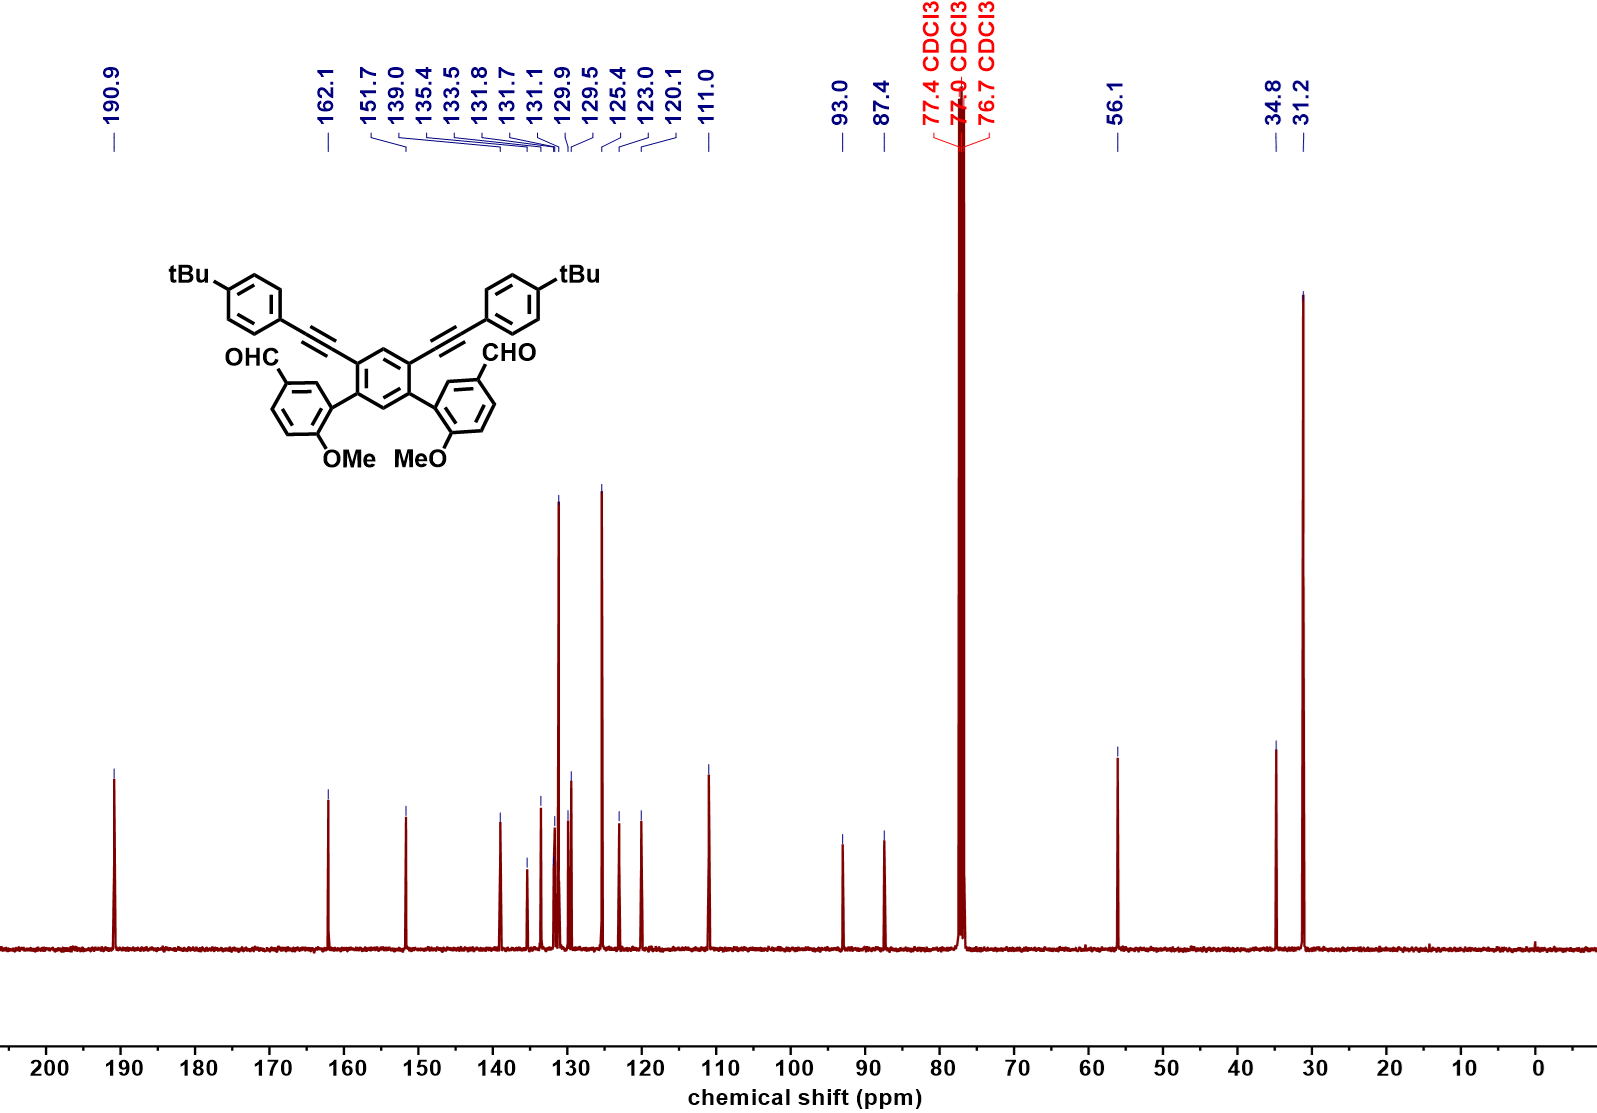


**Figure S94** 13C NMR spectrum of compound **22a** (101 MHz, CDCl3, 298 K)


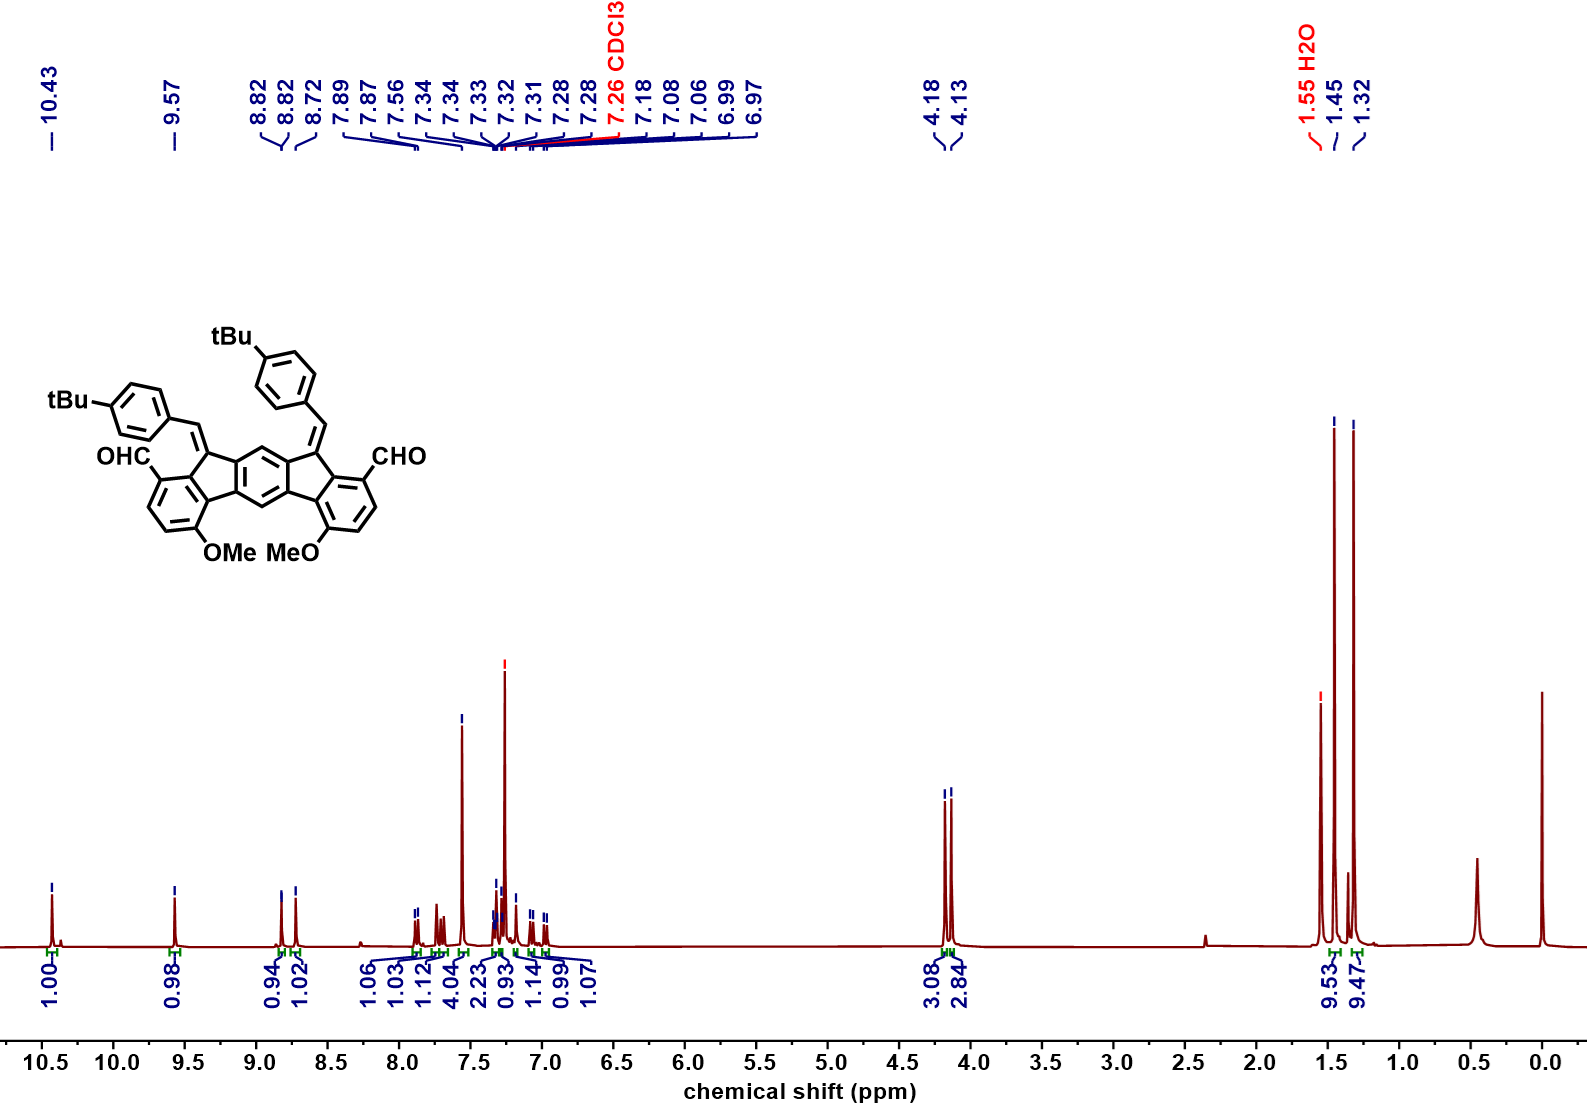


**Figure S95** 1H NMR spectrum of compound **23-1a** (400 MHz, CDCl3, 298 K)


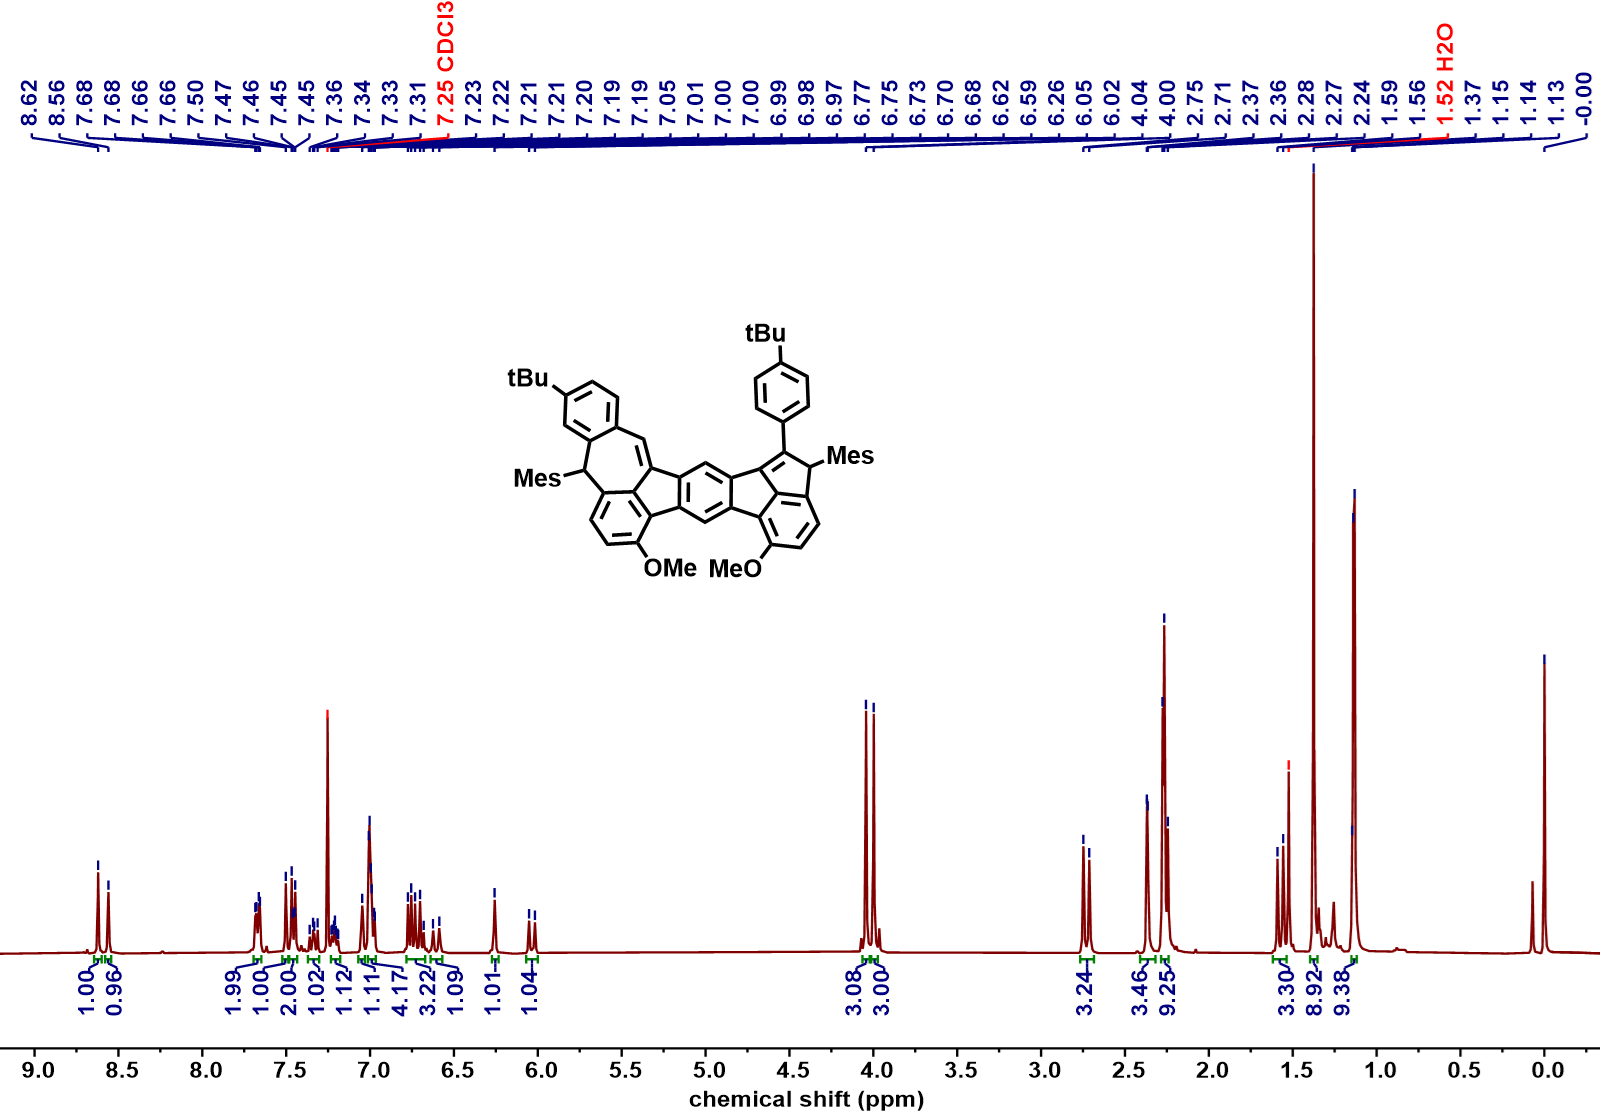


**Figure S96** 1H NMR spectrum of compound **24-1a** (400 MHz, CDCl3, 298 K)


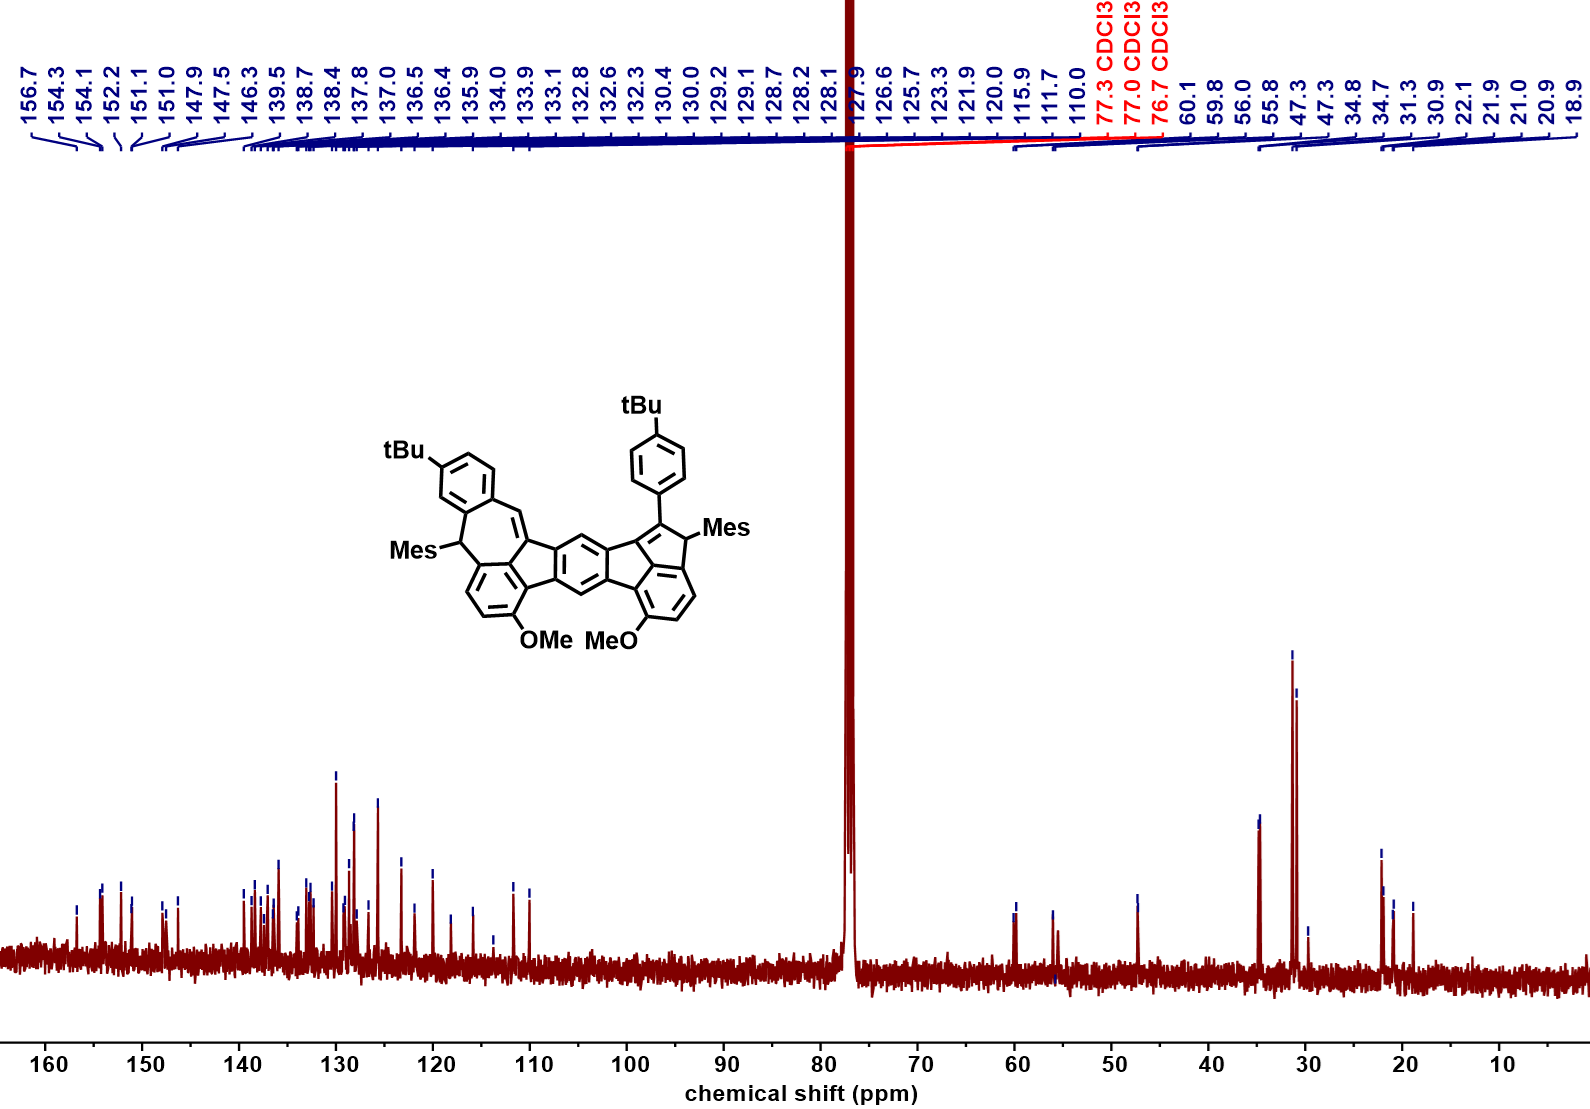


**Figure S97** 13C NMR spectrum of compound **24-1a** (101 MHz, CDCl3, 298 K)

**Figure S98** 1H NMR spectrum of compound **24-3a** (400 MHz, CDCl3, 298 K)

**Figure S99** 13C NMR spectrum of compound **24-3a** (101 MHz, CDCl3, 298 K)

**Figure S100** 1H NMR spectrum of compound **26-1a** (400 MHz, CDCl3, 298 K)

**Figure S101** 13C NMR spectrum of compound **26-1a** (101 MHz, CDCl3, 298 K)

**Figure S102** 1H NMR spectrum of compound **Na-OTf** (400 MHz, CDCl3, 298 K)

**Figure S103** 13C NMR spectrum of compound **Na-OTf** (101 MHz, CDCl3, 298 K)

**Figure S104** 1H NMR spectrum of compound **Na-Yne** (400 MHz, CDCl3, 298 K)

**Figure S105** 13C NMR spectrum of compound **Na-Yne** (101 MHz, CDCl3, 298 K)

**Figure S106** 1H NMR spectrum of compound **22b** (400 MHz, CDCl3, 298 K)

**Figure S107** 13C NMR spectrum of compound **22b** (101 MHz, CDCl3, 298 K)

**Figure S108** 1H NMR spectrum of compound **23-3b** (400 MHz, CDCl3, 298 K)

**Figure S109** 13C NMR spectrum of compound **23-3b** (101 MHz, CDCl3, 298 K)

**Figure S110** 1H NMR spectrum of compound **24-1b** (400 MHz, CDCl3, 298 K)

**Figure S111** 13C NMR spectrum of compound **24-1b** (101 MHz, CDCl3, 298 K)

**Figure S112** 1H NMR spectrum of compound **24-2b** (400 MHz, CDCl3, 298 K)

**Figure S113** 13C NMR spectrum of compound **24-2b** (101 MHz, CDCl3, 298 K)

**Figure S114** 1H NMR spectrum of compound **24-3b** (400 MHz, CDCl3, 298 K)

**Figure S115** 13C NMR spectrum of compound **24-3b** (101 MHz, CDCl3, 298 K)

**Figure S116** 1H NMR spectrum of compound **26-1b** (600 MHz, CDCl3, 298 K)

**Figure S117** 13C NMR spectrum of compound **26-1b** (151 MHz, CDCl3, 298 K)

14. HRMS spectra

**Figure S118** HRMS spectrum of compound **5**

**Figure S119** HRMS spectrum of compound **6**

**Figure S120** HRMS spectrum of compound **7**

**Figure S121** HRMS spectrum of compound **9**

**Figure S122** HRMS spectrum of compound **1**

**Figure S123** HRMS spectrum of compound **11**

**Figure S124** HRMS spectrum of compound **12**

**Figure S125** HRMS spectrum of compound **13**

**Figure S126** HRMS spectrum of compound **15**

**Figure S127** HRMS spectrum of compound **2**

**Figure S128** HRMS spectrum of compound **17**

**Figure S129** HRMS spectrum of compound **18**

**Figure S130** HRMS spectrum of compound **19**

**Figure S131** HRMS spectrum of compound **21**

**Figure S132** HRMS spectrum of compound **3**

**Figure S133** HRMS spectrum of compound **22a**

**Figure S134** HRMS spectrum of the mixture of **23-1a**, **23-2a** and **23-3a**

**Figure S135** HRMS spectrum of compound **24-1a**

**Figure S136** HRMS spectrum of compound **24-3a**

**Figure S137** HRMS spectrum of compound **25-3a**

**Figure S138** HRMS spectrum of compound **26-1a**

**Figure S139** HRMS spectrum of compound **22b**

**Figure S140** HRMS spectrum of the mixture of **23-1b**, **23-2b** and **23-3b**

**Figure S141** HRMS spectrum of compound **24-1b**

**Figure S142** HRMS spectrum of compound **24-2b**

**Figure S143** HRMS spectrum of compound **24-3b**

**Figure S144** HRMS spectrum of compound **25-3b**

**Figure S145** HRMS spectrum of compound **26-1b**

15. Reference

[S1] M. J. Frisch, G. W. Trucks, H. B. Schlegel, G. E. Scuseria, M. A. Robb, J. R. Cheeseman, G. Scalmani, V. Barone, G. A. Petersson, H. Nakatsuji, X. Li, M. Caricato, A. V. Marenich, J. Bloino, B. G. Janesko, R. Gomperts, B. Mennucci, H. P. Hratchian, J. V. Ortiz, A. F. Izmaylov, J. L. Sonnenberg, D. Williams-Young, F. Ding, F. Lipparini, F. Egidi, J. Goings, B. Peng, A. Petrone, T. Henderson, D. Ranasinghe, V. G. Zakrzewski, J. Gao, N. Rega, G. Zheng, W. Liang, M. Hada, M. Ehara, K. Toyota, R. Fukuda, J. Hasegawa, M. Ishida, T. Nakajima, Y. Honda, O. Kitao, H. Nakai, T. Vreven, K. Throssell, J. A. Montgomery Jr, J. E. Peralta, F. Ogliaro, M. J. Bearpark, J. J. Heyd, E. N. Brothers, K. N. Kudin, V. N. Staroverov, T. A. Keith, R. Kobayashi, J. Normand, K. Raghavachari, A. P. Rendell, J. C. Burant, S. S. Iyengar, J. Tomasi, M. Cossi, J. M. Millam, M. Klene, C. Adamo, R. Cammi, J. W. Ochterski, R. L. Martin, K. Morokuma, O. Farkas, J. B. Foresman, D. J. Fox, *Gaussian 09, Revision E.01*, Gaussian, Inc., Wallingford CT, **2013**.

[S2] P. J. Stephens, F. J. Devlin, C. F. Chabalowski, M. J. Frisch, *J. Phys. Chem.,* **1994**, *98*, 11623-11627.

[S3] S. Grimme, J. Antony, S. Ehrlich, H. Krieg, *J. Chem. Phys.,* **2010**, *132*, 154104.

[S4] P. C. Hariharan, J. A. Pople, *Theor. Chim. Acta,* **1973**, *28*, 213-222.

[S5] F. Furche, R. Ahlrichs, *J. Chem. Phys.,* **2002**, *117*, 7433-7447.

[S6] Z. Chen, C. S. Wannere, C. Corminboeuf, R. Puchta, P. V. R. Schleyer, *Chem. Rev.*, **2005**, *105*, 3842-3888.

[S7] D. Geuenich, K. Hess, F. Köhler, R. Herges, *Chem. Rev.*, **2005**, *105*, 3758-3772.

[S8] Z. Liu, T. Lu, Q. Chen, *Carbon*, **2020**, *165*, 468-475.

[S9] T. Lu, F. Chen, *J. Comput. Chem.*, **2012**, *33*, 580-592.

[S10] K. Kamada, K. Ohta, A. Shimizu, T. Kubo, R. Kishi, H. Takahashi, E. Botek, B. Champagne, M. Nakano, *J. Phys. Chem. Lett.* **2010**, *1*, 937-940.
